# Supplementary material for: Exploring Transcriptomic Landscapes in Red Blood Cells, in Their Extracellular Vesicles and on a Single-Cell Level
Source: MDPI journal article supplement (doi:10.3390/ijms232112897), 2022-10-25

## **Supplementary Material**

Kerkelä E, Lahtela J, Larjo A, Impola U, Mäenpää L, Mattila P: Exploring transcriptomic landscapes in red blood cells, in their extracellular vesicles and on a single-cell level

## Supplementary Methods

**Characterization of RBC-EVs with Western Blot:** Pelleted RBC-EV samples (8d, n=4) were characterized by Western Blot for the origin of EVs. Equal amount of protein (9 µg) was loaded and run on TGX Mini-Protean 4-20% gel (Bio-Rad Laboratories, Hercules, CA, USA) and subsequently electrophoretically transferred to nitrocellulose membranes (BioRad). Nonspecific binding was blocked with 6 % milk-0.05 % Tween 20-Tris (room temperature, 1 h). Rabbit anti-human CD235a (1:1000 dilution, clone EPR8200, Abcam, Cambridge, UK), mouse anti-human Hb (1:10000, clone 7E1F, Abcam), mouse anti-human CD61 (2µg/ml, clone VI-PL2, BD Biosciences), and mouse anti-human apolipoprotein A1 (Apo-A1; 1:1000, Medix Biochemica, Espoo, Finland) antibodies were incubated in 2 % milk-0.05% Tween 20-Tris (+4 °C, overnight), followed by incubation with a horseradish peroxidase-conjugated goat anti-rabbit and goat anti-mouse IgG (H+L) secondary antibodies (1:3000 dilution, 1 h, RT, Bio-Rad Laboratories). The enhanced chemiluminescence (ECL) reagent/kit (GE Healthcare, Amersham, Little Chalfont, UK) was used for detection of results. Apo-A1 and CD61 expression was also studied from supernatant of a 2-day old platelet concentrate (SN) and platelet EV aliquot (PLT-EV), collected by ultracentrifugation from 5d-old platelet concentrate, respectively, to confirm the functionality of antibodies.

**Scanning electron microscopy:** EVs were collected from RBC concentrate, aged 23d of storage and processed the same day. In total, 50 µL of concentrated EVs was placed on concanavalin A (Sigma-Aldrich)–coated glass cover slips and fixed with 5% glutaraldehyde (G7651 Sigma, EM quality) in 0.05 M HEPES buffer (pH 7.2) for 30 min and washed repeatedly with 0.05 M HEPES buffer and stored in a buffer solution until the next day. Samples were post-fixed with 1% OsO<sub>4</sub> and dehydrated in an increasing gradient of ethanol. Samples were allowed to dry on hexamethyldisilazane and were imaged immediately. Before microscopy, the samples were coated with platinum. SEM analyses were conducted by means of a FEG-SEM Quanta 250 microscope (FEI Company, Hillsboro, OR, USA).

## Supplementary Figure Legends

**Supplementary Figure S1.** (A) Gene body coverage plots from the transcription start site (5') to the transcription end site (3') for RBC and EV samples were generated with the RSeQC toolkit. (B) Principal component analysis (PCA) of RBC (blue) and EV (red) samples. The percentages on the axes denote the ratio of explained variance.

**Supplementary Figure S2.** Correlation plots calculated in logarithmic ( $\log_2$ ) scale of TPM (Transcripts Per Kilobase Million) values for 3 representative RBC/RBC pairs, 3 representative EV/EV pairs and all relevant RBC/EV pairs. Correlation coefficient  $R^2$  is shown for each plot.

**Supplementary Figure S3.** RBC-EV characterization. (A) Western blot analysis of representative d8 RBC-EV samples shows that CD235a and Hb proteins are clearly detectable in RBC-EVs, while CD61 and ApoA1 are not present with the same exposure time. Original membrane was cut in four pieces based on predicted size of the protein and incubated individually with the corresponding antibodies (red lines depict the borders of the pieces). (B) Apo-A1 was detected from supernatant of a 2-day old platelet concentrate (SN) and CD61 was expressed in platelet EVs (PLT-EV) collected from 5d-old platelet concentrate, which confirmed that antibodies negative in RBC-EVs were functional. (C) Image of a stain free gel shows, that equal amount of protein (9  $\mu$ g) was loaded per lane. (D) Typical size distribution pattern of RBC-EVs show that the majority of EVs are 100-300 nm in diameter as measured by nanoparticle tracking analysis (NTA). (E) Scanning electron microscopy reveals the wide variety of shapes and sizes in EVs from RBC concentrate.

**Supplementary Figure S4.** Violin plots showing the distribution of the total number of genes (nGene), the total UMIs (nUMI) and the percentage of mitochondrial gene expression (percent.mito) per cell for the total population of cells prior bioinformatics exclusion.

**Supplementary Figure S5.** Combined list of expressed genes (5 or more UMIs) from single-cell sequencing analysis (158 in total, gene list in Supplementary Table 8) was compared with "bulk" RBC transcriptome using the Venny 2.1.0 tool and Ensembl gene IDs.

Figure S1.

A

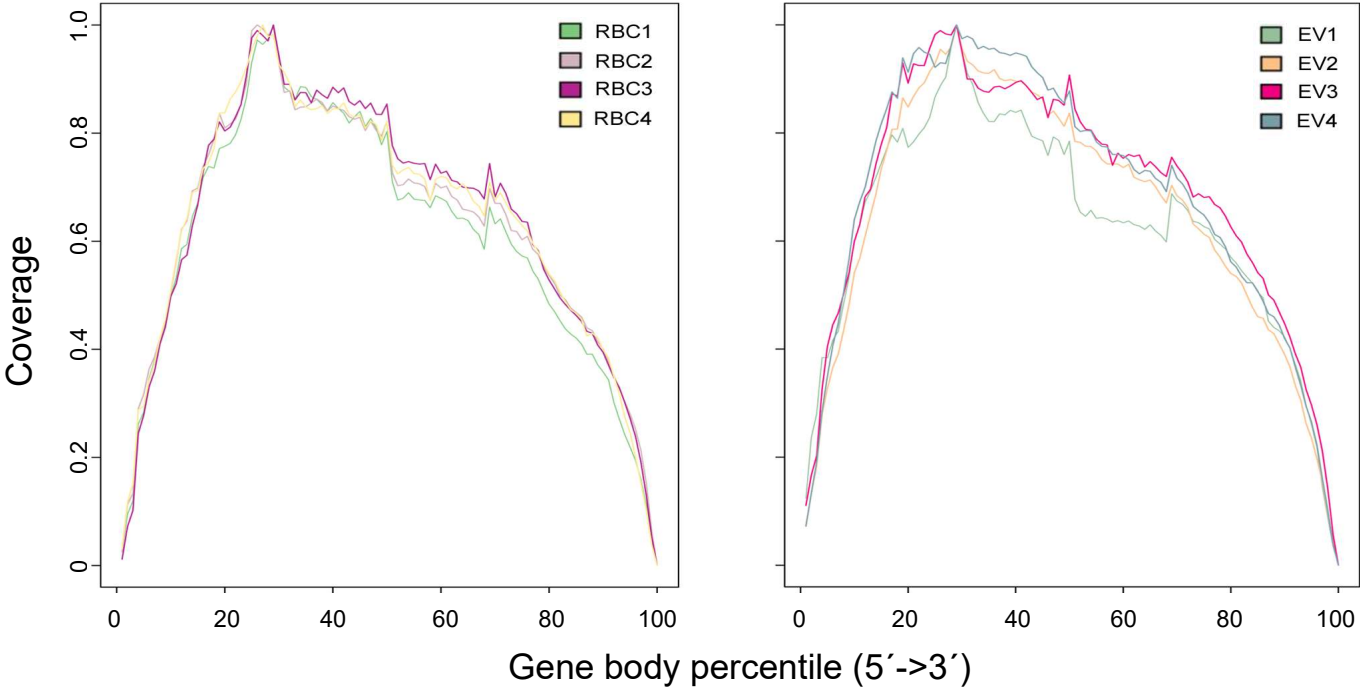

B

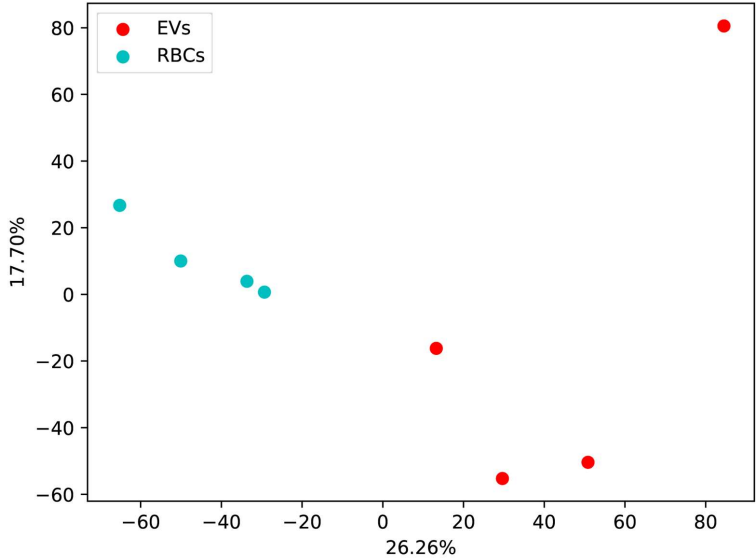

Figure S2.

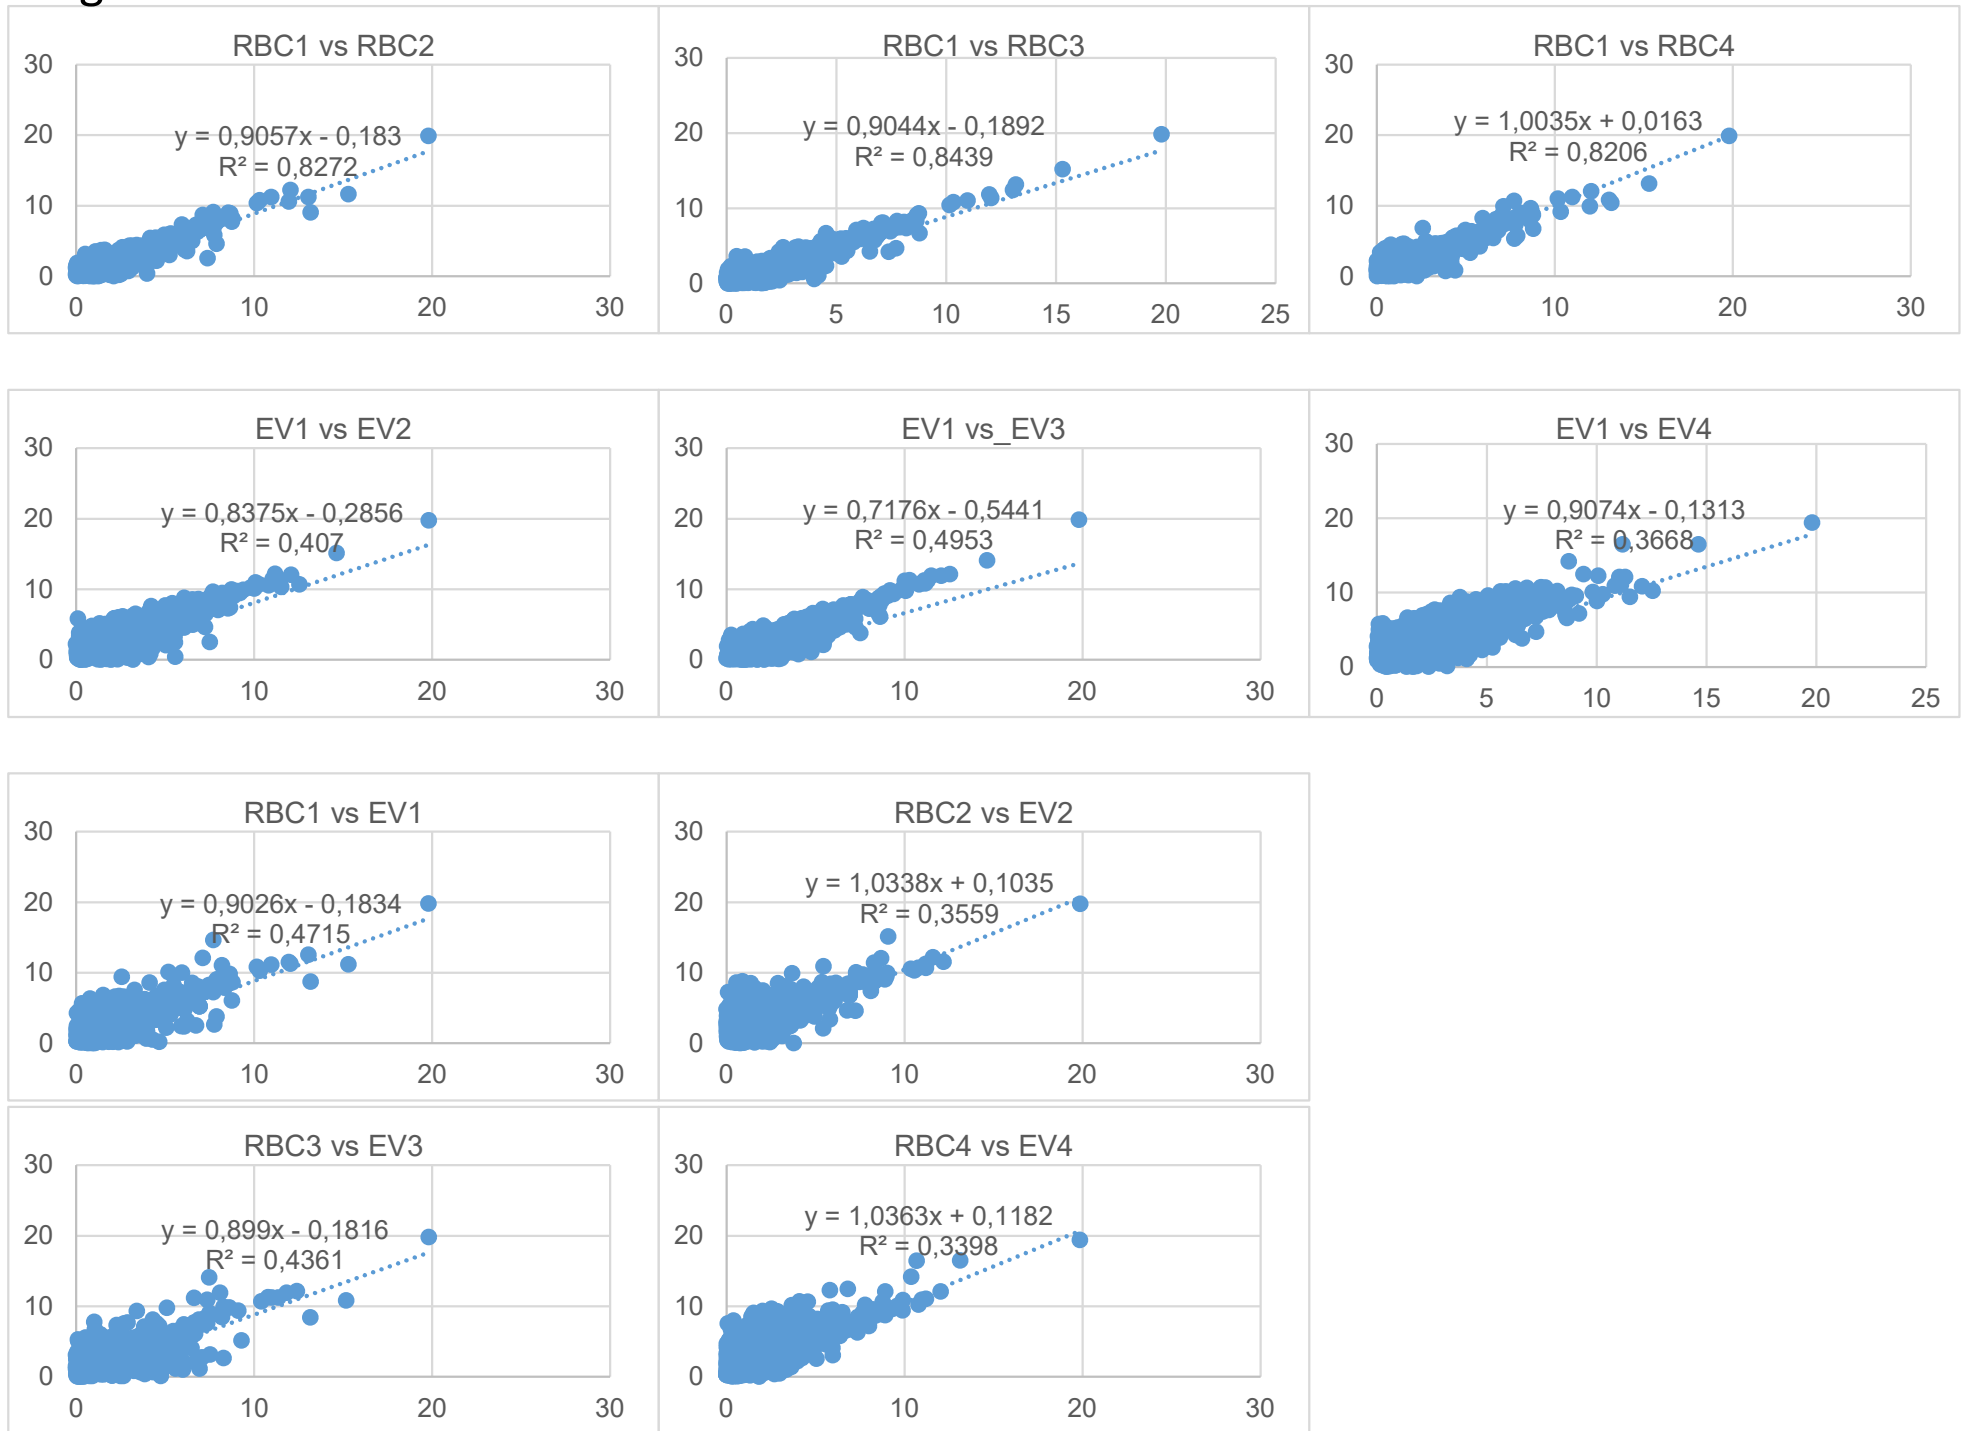

Figure S3.

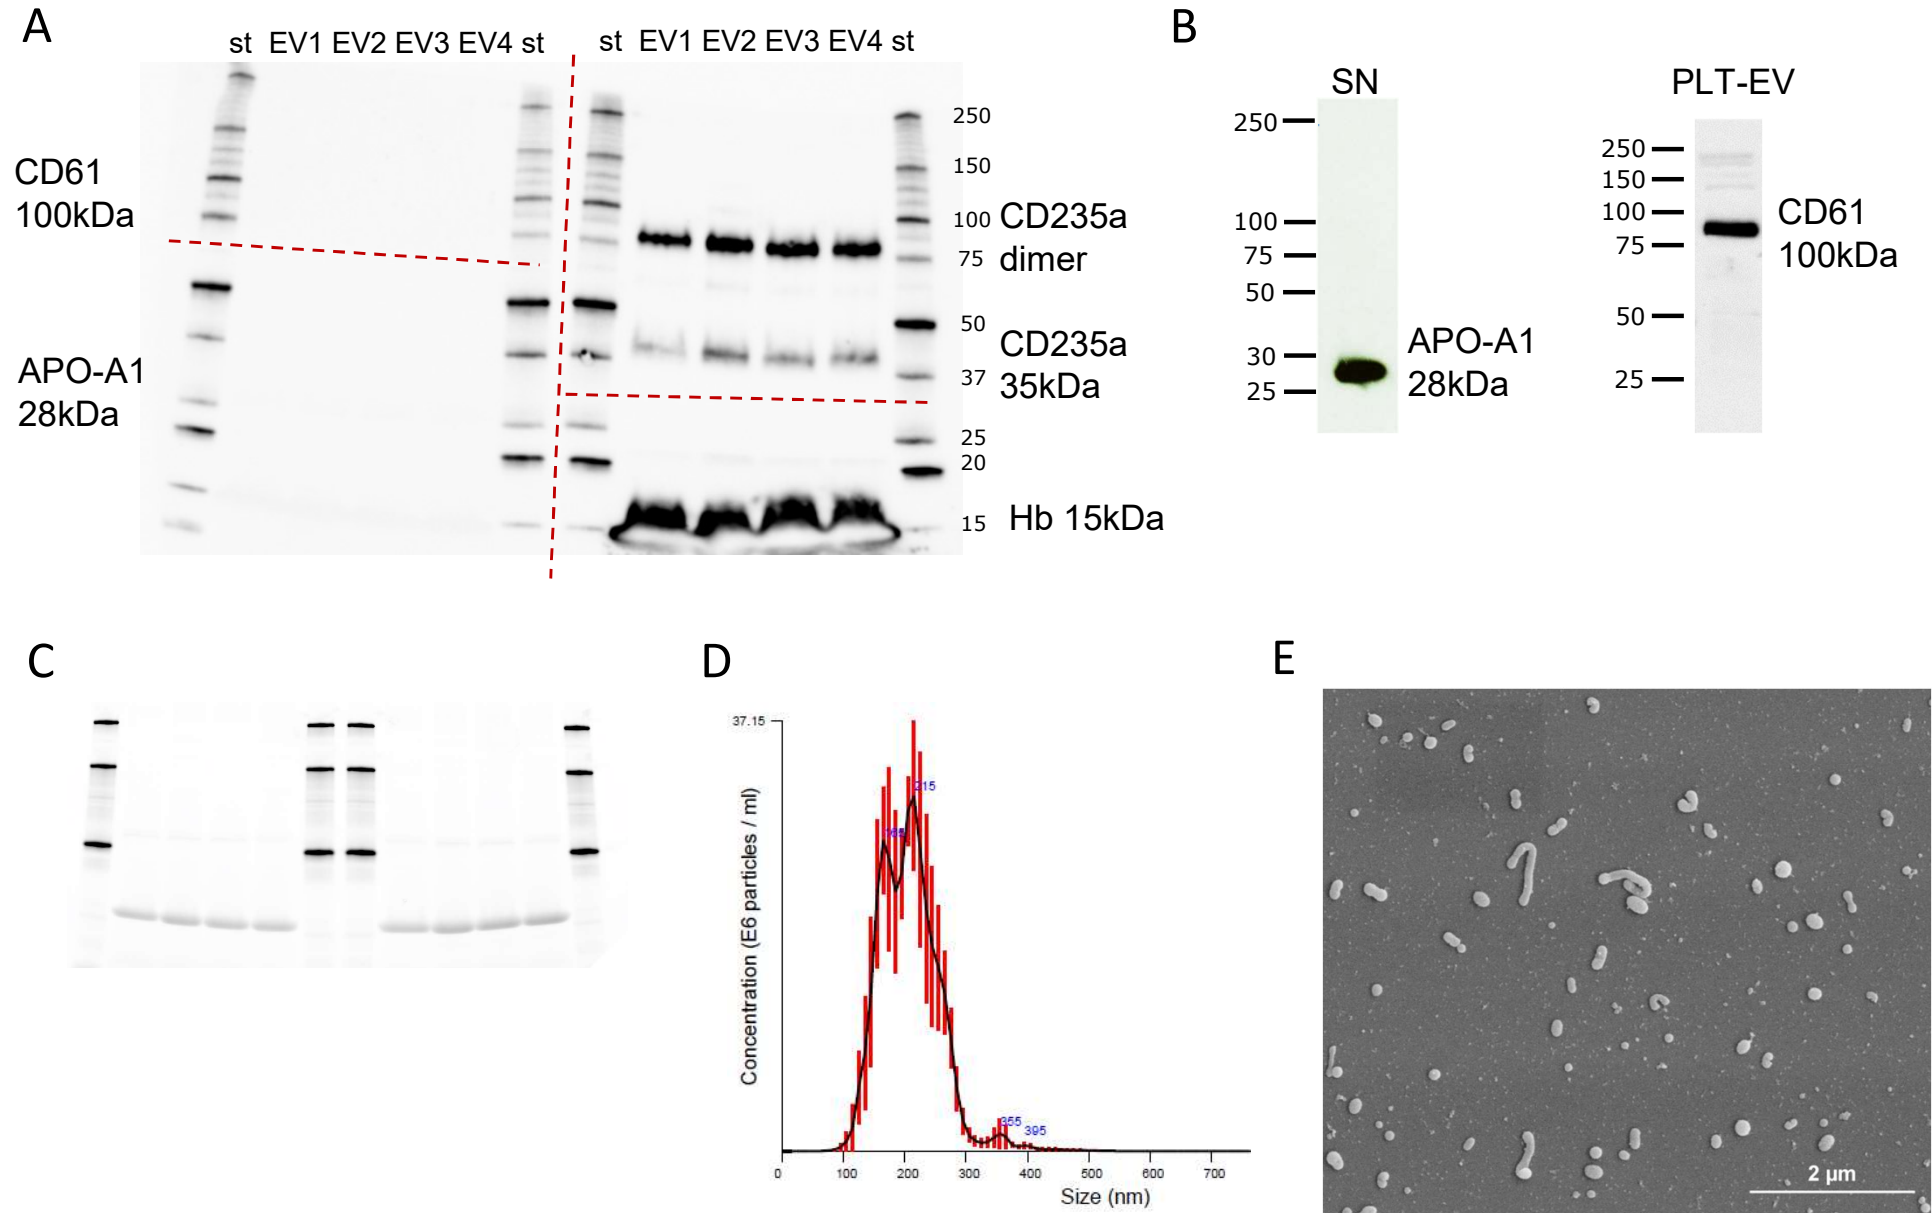

Figure S4.

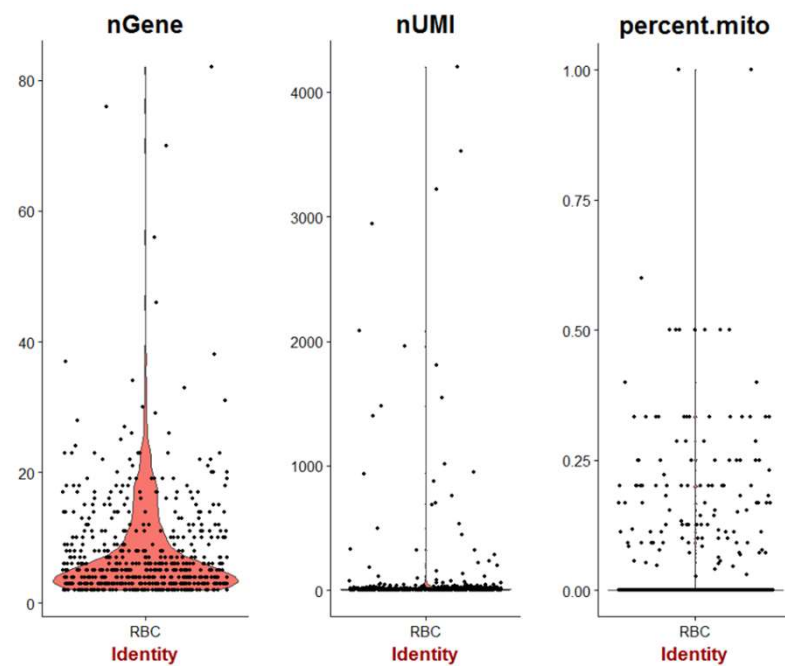

Figure S5.

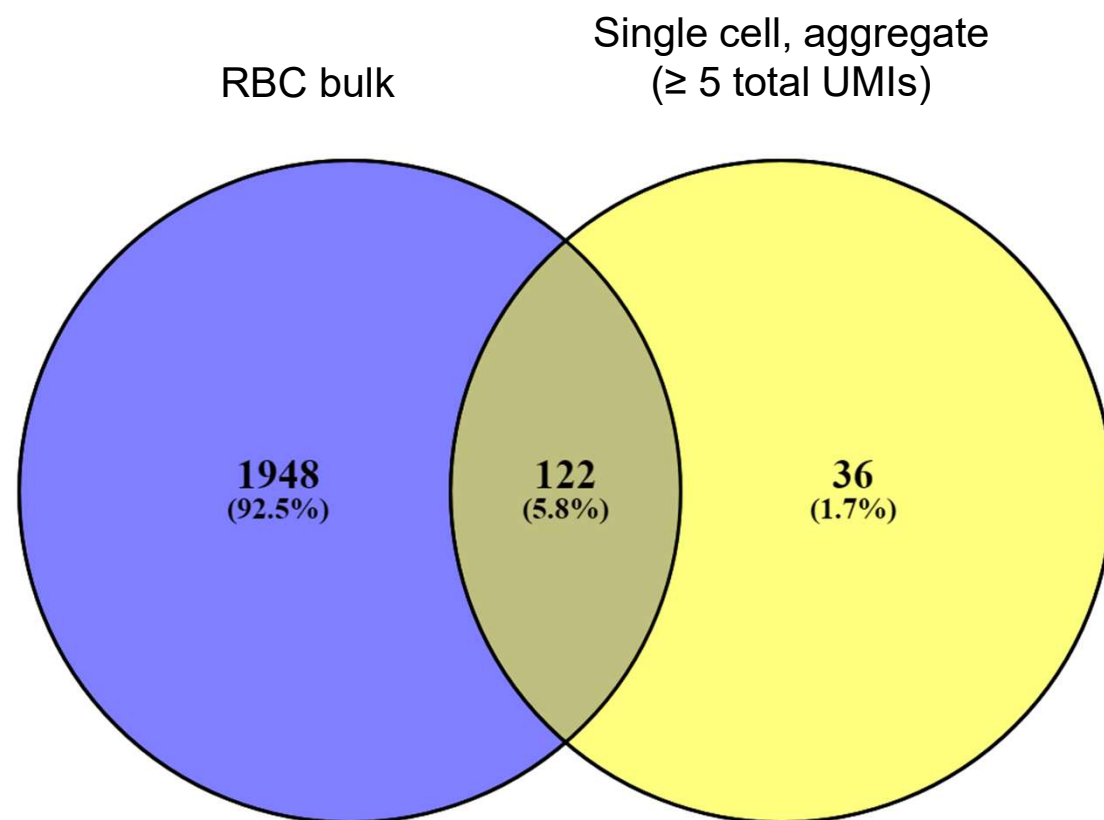

Supplement: s1 [file s1]
