# Supplementary material for: Exploring Transcriptomic Landscapes in Red Blood Cells, in Their Extracellular Vesicles and on a Single-Cell Level
Source: Int J Mol Sci. 2022 Oct 25;23(21):12897. doi: 10.3390/ijms232112897 (PMC9657499; doi:10.3390/ijms232112897)
Supplement: Supplementary file 1 [file ijms-23-12897-s001.zip › Supplementary Tables S1-S11.xlsx]

## Sheet: Supplementary Table 1
Supplementary Table S1. Alignment statistics for RNAseq
(mean of 4 individual samples)
Aligner	RBCs		EVs
	Uniquely aligned (reads)	Uniquely aligned (%)	Uniquely aligned (reads)	Uniquely aligned (%)
Star	39806345	90.7	21 737 632	54.8
Kallisto	41 792 122	95.2	22 741 112	57.3

## Sheet: Supplementary Table 2
Supplementary Table S2. Expressed genes in RBCs (n = 4, cut-off value 5 counts). Data was annotated using QIAGEN’s Ingenuity® Pathway Analysis (IPA®, QIAGEN, Dec 16th, 2016) or Ensembl genome browser (http://www.ensembl.org, release 88 - Mar 2017).
Symbol	Entrez Gene Name	ENSEMBL ID	Exp Intensity (TPM; RBC1)	Exp Intensity (TPM; RBC2)	Exp Intensity (TPM; RBC3)	Exp Intensity (TPM; RBC4)	Exp Intensity(mean)	Location	Type(s)
AAAS	aladin WD repeat nucleoporin	ENSG00000094914	50	51	132	113	86.5	Nucleus	other
AAGAB	alpha- and gamma-adaptin binding protein	ENSG00000103591	14	18	69	50	37.75	Cytoplasm	other
ABALON	apoptotic BCL2L1-antisense long non-coding RNA	ENSG00000281376	38	13	114	88	63.25	Other	other
ABCB10	ATP binding cassette subfamily B member 10	ENSG00000135776	100	102	125	265	148	Cytoplasm	transporter
ABCC13	ATP binding cassette subfamily C member 13 (pseudogene) [Source:HGNC Symbol	ENSG00000243064	665	162	474	484	446.25
ABCC4	ATP binding cassette subfamily C member 4	ENSG00000125257	97	60	60	132	87.25	Plasma Membrane	transporter
ABCF1	ATP binding cassette subfamily F member 1	ENSG00000204574	59	84	44	57	61	Cytoplasm	transporter
ABHD5	abhydrolase domain containing 5	ENSG00000011198	15	5	28	70	29.5	Cytoplasm	enzyme
ABTB1	ankyrin repeat and BTB domain containing 1	ENSG00000114626	603	109	3421	1274	1351.75	Cytoplasm	translation regulator
AC004453.8	OTTHUMG00000155305 (Vega gene) is an external reference matched to Gene ENSG00000146677	ENSG00000146677	5	6	8	18	9.25
AC006547.13	OTTHUMG00000150731 (Vega gene) is an external reference matched to Gene ENSG00000236540	ENSG00000236540	21	5	9	36	17.75
AC007256.5	OTTHUMG00000154748 (Vega gene) is an external reference matched to Gene ENSG00000213090	ENSG00000213090	7	68	54	136	66.25
AC009403.2	OTTHUMG00000151355 (Vega gene) is an external reference matched to Gene ENSG00000216895	ENSG00000216895	13	30	19	28	22.5
AC116366.5	OTTHUMG00000059494 (Vega gene) is an external reference matched to Gene ENSG00000238160	ENSG00000238160	20	27	22	22	22.75
ACADM	acyl-CoA dehydrogenase, C-4 to C-12 straight chain	ENSG00000117054	20	71	27	31	37.25	Cytoplasm	enzyme
ACAP2	ArfGAP with coiled-coil, ankyrin repeat and PH domains 2	ENSG00000114331	59	200	48	130	109.25	Nucleus	other
ACKR1	atypical chemokine receptor 1 (Duffy blood group)	ENSG00000213088	393	397	404	549	435.75	Plasma Membrane	G-protein coupled receptor
ACKR2	atypical chemokine receptor 2	ENSG00000144648	6	53	17	112	47	Plasma Membrane	G-protein coupled receptor
ACP1	acid phosphatase 1, soluble	ENSG00000143727	319	288	367	186	290	Cytoplasm	phosphatase
ACSL6	acyl-CoA synthetase long-chain family member 6	ENSG00000164398	46	29	21	29	31.25	Cytoplasm	enzyme
ACTB	actin beta	ENSG00000075624	192	179	265	95	182.75	Cytoplasm	other
ACTR1A	ARP1 actin-related protein 1 homolog A, centractin alpha	ENSG00000138107	114	68	160	191	133.25	Cytoplasm	other
ACTR3	ARP3 actin related protein 3 homolog	ENSG00000115091	43	35	43	83	51	Plasma Membrane	other
ADAL	adenosine deaminase like	ENSG00000168803	10	28	21	59	29.5	Cytoplasm	enzyme
ADAR	adenosine deaminase, RNA specific	ENSG00000160710	10	73	61	29	43.25	Nucleus	enzyme
ADD1	adducin 1	ENSG00000087274	97	86	324	258	191.25	Cytoplasm	other
ADD2	adducin 2	ENSG00000075340	52	79	13	68	53	Cytoplasm	other
ADIPOR1	adiponectin receptor 1	ENSG00000159346	8827	8714	6044	11168	8688.25	Plasma Membrane	transmembrane receptor
AFF1	AF4/FMR2 family member 1	ENSG00000172493	84	197	46	165	123	Nucleus	transcription regulator
AFTPH	aftiphilin	ENSG00000119844	17	37	9	42	26.25	Cytoplasm	other
AGER	advanced glycosylation end product-specific receptor	ENSG00000204305	20	11	32	103	41.5	Plasma Membrane	transmembrane receptor
AGGF1	angiogenic factor with G-patch and FHA domains 1	ENSG00000164252	117	229	65	190	150.25	Cytoplasm	other
AGO2	argonaute 2, RISC catalytic component	ENSG00000123908	98	83	128	93	100.5	Cytoplasm	translation regulator
AGPAT3	1-acylglycerol-3-phosphate O-acyltransferase 3	ENSG00000160216	15	19	33	23	22.5	Cytoplasm	enzyme
AGTPBP1	ATP/GTP binding protein 1	ENSG00000135049	153	271	17	263	176	Nucleus	peptidase
AHSP	alpha hemoglobin stabilizing protein	ENSG00000169877	2912	3609	6491	3575	4146.75	Cytoplasm	other
AIDA	axin interactor, dorsalization associated	ENSG00000186063	133	198	83	205	154.75	Cytoplasm	other
AK9	adenylate kinase 9	ENSG00000155085	13	58	21	45	34.25	Nucleus	kinase
AKAP13	A-kinase anchoring protein 13	ENSG00000170776	30	28	137	125	80	Cytoplasm	other
AKAP7	A-kinase anchoring protein 7	ENSG00000118507	1225	2725	1379	2438	1941.75	Plasma Membrane	other
AKAP9	A-kinase anchoring protein 9	ENSG00000127914	631	1419	480	1590	1030	Cytoplasm	other
AKT1S1	AKT1 substrate 1	ENSG00000204673	27	15	37	40	29.75	Cytoplasm	other
AL353644.10	This identifier is not in the current EnsEMBL database but it has been mapped to 1 deprecated identifier, ENSG00000277048.1, non-coding RNA	ENSG00000277048	189	197	325	616	331.75
AL592183.1	Novel protein coding, there is no ungapped mapping of this gene onto the GRCh37 assembly	ENSG00000273748	7	14	12	29	15.5
ALAD	aminolevulinate dehydratase	ENSG00000148218	79	160	310	448	249.25	Cytoplasm	enzyme
ALAS2	5'-aminolevulinate synthase 2	ENSG00000158578	185510	155254	64482	66432	117920	Cytoplasm	enzyme
ALDOA	aldolase, fructose-bisphosphate A	ENSG00000149925	46	22	76	46	47.5	Cytoplasm	enzyme
ALG13	ALG13, UDP-N-acetylglucosaminyltransferase subunit	ENSG00000101901	14	5	22	25	16.5	Cytoplasm	enzyme
ALKBH5	alkB homolog 5, RNA demethylase	ENSG00000091542	12	42	18	32	26	Nucleus	enzyme
ALMS1	ALMS1, centrosome and basal body associated protein	ENSG00000116127	152	300	96	309	214.25	Cytoplasm	other
ALS2CR12	amyotrophic lateral sclerosis 2 chromosome region candidate 12	ENSG00000155749	942	2233	1102	2013	1572.5	Cytoplasm	other
AMFR	autocrine motility factor receptor	ENSG00000159461	19	5	25	52	25.25	Plasma Membrane	transmembrane receptor
AMMECR1	Alport syndrome, mental retardation, midface hypoplasia and elliptocytosis chromosomal region gene 1	ENSG00000101935	7	23	19	5	13.5	Other	other
ANAPC16	anaphase promoting complex subunit 16	ENSG00000166295	160	228	162	262	203	Nucleus	other
ANK1	ankyrin 1	ENSG00000029534	777	1355	797	1700	1157.25	Plasma Membrane	other
ANKH	ANKH inorganic pyrophosphate transport regulator	ENSG00000154122	63	232	130	170	148.75	Plasma Membrane	transporter
ANKIB1	ankyrin repeat and IBR domain containing 1	ENSG00000001629	188	211	135	433	241.75	Nucleus	transcription regulator
ANKRD12	ankyrin repeat domain 12	ENSG00000101745	319	547	368	292	381.5	Nucleus	other
ANKRD13A	ankyrin repeat domain 13A	ENSG00000076513	19	15	45	28	26.75	Plasma Membrane	other
ANKRD17	ankyrin repeat domain 17	ENSG00000132466	37	98	80	134	87.25	Nucleus	other
ANKRD26	ankyrin repeat domain 26	ENSG00000107890	204	284	149	345	245.5	Nucleus	transcription regulator
ANKRD36	ankyrin repeat domain 36	ENSG00000135976	59	111	58	106	83.5	Other	other
ANKRD36BP2	ankyrin repeat domain 36B pseudogene 2 [Source:HGNC Symbol	ENSG00000230006	963	2037	875	2137	1503
ANKRD36C	ankyrin repeat domain 36C	ENSG00000174501	183	225	44	137	147.25	Other	other
ANO10	anoctamin 10	ENSG00000160746	32	68	27	92	54.75	Plasma Membrane	ion channel
ANO7L1	anoctamin 7 like 1 [Source:HGNC Symbol	ENSG00000237276	29	139	81	138	96.75
ANP32B	acidic nuclear phosphoprotein 32 family member B	ENSG00000136938	570	1239	609	1758	1044	Nucleus	other
ANP32E	acidic nuclear phosphoprotein 32 family member E	ENSG00000143401	479	851	289	509	532	Nucleus	other
ANXA7	annexin A7	ENSG00000138279	110	216	145	123	148.5	Plasma Membrane	ion channel
AP2A1	adaptor related protein complex 2 alpha 1 subunit	ENSG00000196961	43	11	38	61	38.25	Cytoplasm	transporter
AP2B1	adaptor related protein complex 2 beta 1 subunit	ENSG00000006125	890	501	855	1295	885.25	Plasma Membrane	transporter
AP2M1	adaptor related protein complex 2 mu 1 subunit	ENSG00000161203	5091	8730	12712	9310	8960.75	Cytoplasm	transporter
AP2S1	adaptor related protein complex 2 sigma 1 subunit	ENSG00000042753	215	222	519	343	324.75	Cytoplasm	transporter
APLF	aprataxin and PNKP like factor [Source:HGNC Symbol	ENSG00000169621	52	72	44	178	86.5
APOBEC2	apolipoprotein B mRNA editing enzyme catalytic subunit 2	ENSG00000124701	9	104	28	53	48.5	Other	enzyme
APOBEC3C	apolipoprotein B mRNA editing enzyme catalytic subunit 3C	ENSG00000244509	1118	849	1113	1546	1156.5	Other	enzyme
APOL3	apolipoprotein L3	ENSG00000128284	6	19	11	20	14	Cytoplasm	transporter
APOM	apolipoprotein M	ENSG00000204444	26	7	41	15	22.25	Plasma Membrane	transporter
APOOL	apolipoprotein O like [Source:HGNC Symbol	ENSG00000155008	13	57	17	45	33
APOPT1	apoptogenic 1, mitochondrial	ENSG00000256053	14	18	33	8	18.25	Cytoplasm	other
ARAF	A-Raf proto-oncogene, serine/threonine kinase	ENSG00000078061	163	132	285	234	203.5	Cytoplasm	kinase
ARF1	ADP ribosylation factor 1	ENSG00000143761	764	204	2010	529	876.75	Cytoplasm	enzyme
ARF4	ADP ribosylation factor 4	ENSG00000168374	266	277	128	239	227.5	Cytoplasm	enzyme
ARF4-AS1	ARF4 antisense RNA 1 [Source:HGNC Symbol	ENSG00000272146	6	5	7	24	10.5
ARG1	arginase 1	ENSG00000118520	131	231	122	227	177.75	Cytoplasm	enzyme
ARHGAP42	Rho GTPase activating protein 42	ENSG00000165895	19	106	16	75	54	Other	other
ARHGAP5	Rho GTPase activating protein 5	ENSG00000100852	126	305	33	258	180.5	Cytoplasm	enzyme
ARHGEF12	Rho guanine nucleotide exchange factor 12	ENSG00000196914	439	1100	715	1460	928.5	Cytoplasm	other
ARID1A	AT-rich interaction domain 1A	ENSG00000117713	18	65	33	57	43.25	Nucleus	transcription regulator
ARID2	AT-rich interaction domain 2	ENSG00000189079	6	58	11	6	20.25	Nucleus	transcription regulator
ARID4A	AT-rich interaction domain 4A	ENSG00000032219	69	127	29	59	71	Nucleus	transcription regulator
ARID4B	AT-rich interaction domain 4B	ENSG00000054267	301	624	272	726	480.75	Nucleus	enzyme
ARL4A	ADP ribosylation factor like GTPase 4A	ENSG00000122644	1659	1004	1070	1963	1424	Nucleus	enzyme
ARL6IP1	ADP ribosylation factor like GTPase 6 interacting protein 1	ENSG00000170540	195	496	139	334	291	Cytoplasm	other
ARL6IP5	ADP ribosylation factor like GTPase 6 interacting protein 5	ENSG00000144746	27	41	9	37	28.5	Cytoplasm	other
ARMC1	armadillo repeat containing 1	ENSG00000104442	16	15	42	53	31.5	Cytoplasm	other
ARMC6	armadillo repeat containing 6	ENSG00000105676	19	12	17	43	22.75	Other	other
ARMC8	armadillo repeat containing 8	ENSG00000114098	60	87	107	60	78.5	Nucleus	other
ARNT	aryl hydrocarbon receptor nuclear translocator	ENSG00000143437	51	58	60	74	60.75	Nucleus	transcription regulator
ARPC3	actin related protein 2/3 complex subunit 3	ENSG00000111229	134	91	100	63	97	Cytoplasm	other
ARPC4	actin related protein 2/3 complex subunit 4	ENSG00000241553	55	105	102	128	97.5	Cytoplasm	other
ARRB2	arrestin beta 2	ENSG00000141480	257	421	959	581	554.5	Cytoplasm	other
ASAP1	ArfGAP with SH3 domain, ankyrin repeat and PH domain 1	ENSG00000153317	365	662	305	738	517.5	Plasma Membrane	other
ASB8	ankyrin repeat and SOCS box containing 8	ENSG00000177981	44	44	70	87	61.25	Nucleus	transcription regulator
ASCC2	activating signal cointegrator 1 complex subunit 2	ENSG00000100325	2299	1641	4024	3036	2750	Nucleus	other
ASH1L	ASH1 like histone lysine methyltransferase	ENSG00000116539	103	214	92	232	160.25	Nucleus	transcription regulator
ASH2L	ASH2 like histone lysine methyltransferase complex subunit	ENSG00000129691	91	218	89	329	181.75	Nucleus	transcription regulator
ASNA1	arsA arsenite transporter, ATP-binding, homolog 1 (bacterial)	ENSG00000198356	255	456	410	668	447.25	Nucleus	transporter
ASPH	aspartate beta-hydroxylase	ENSG00000198363	8	52	16	39	28.75	Cytoplasm	enzyme
ASPM	abnormal spindle microtubule assembly	ENSG00000066279	114	205	57	130	126.5	Nucleus	other
ASXL2	additional sex combs like 2, transcriptional regulator	ENSG00000143970	8	70	15	58	37.75	Extracellular Space	other
ATAD2	ATPase family, AAA domain containing 2	ENSG00000156802	256	670	402	434	440.5	Nucleus	enzyme
ATAD2B	ATPase family, AAA domain containing 2B	ENSG00000119778	312	600	195	768	468.75	Nucleus	other
ATAD5	ATPase family, AAA domain containing 5	ENSG00000176208	192	455	98	407	288	Extracellular Space	other
ATF2	activating transcription factor 2	ENSG00000115966	26	39	32	29	31.5	Nucleus	transcription regulator
ATF4	activating transcription factor 4	ENSG00000128272	65	37	157	92	87.75	Nucleus	transcription regulator
ATF7IP	activating transcription factor 7 interacting protein	ENSG00000171681	107	259	100	347	203.25	Nucleus	transcription regulator
ATG12	autophagy related 12	ENSG00000145782	27	35	39	51	38	Cytoplasm	other
ATG13	autophagy related 13	ENSG00000175224	31	94	107	133	91.25	Cytoplasm	other
ATG3	autophagy related 3	ENSG00000144848	128	287	63	176	163.5	Cytoplasm	enzyme
ATG9A	autophagy related 9A	ENSG00000198925	36	11	86	43	44	Cytoplasm	other
ATM	ATM serine/threonine kinase	ENSG00000149311	22	50	12	23	26.75	Nucleus	kinase
ATP2B1	ATPase plasma membrane Ca2+ transporting 1	ENSG00000070961	106	81	77	86	87.5	Plasma Membrane	transporter
ATP5B	ATP synthase, H+ transporting, mitochondrial F1 complex, beta polypeptide	ENSG00000110955	774	173	2282	292	880.25	Cytoplasm	transporter
ATP5E	ATP synthase, H+ transporting, mitochondrial F1 complex, epsilon subunit	ENSG00000124172	5752	3567	4870	10151	6085	Cytoplasm	other
ATP5F1	ATP synthase, H+ transporting, mitochondrial Fo complex subunit B1	ENSG00000116459	6	8	9	61	21	Cytoplasm	transporter
ATP5H	ATP synthase, H+ transporting, mitochondrial Fo complex subunit D	ENSG00000167863	20	9	18	17	16	Cytoplasm	enzyme
ATP5I	ATP synthase, H+ transporting, mitochondrial Fo complex subunit E	ENSG00000169020	12	10	14	32	17	Cytoplasm	transporter
ATP5J	ATP synthase, H+ transporting, mitochondrial Fo complex subunit F6	ENSG00000154723	62	61	85	70	69.5	Cytoplasm	transporter
ATP5J2	ATP synthase, H+ transporting, mitochondrial Fo complex subunit F2	ENSG00000241468	19	27	51	46	35.75	Cytoplasm	transporter
ATP5L	ATP synthase, H+ transporting, mitochondrial Fo complex subunit G	ENSG00000167283	188	136	113	197	158.5	Cytoplasm	enzyme
ATP5O	ATP synthase, H+ transporting, mitochondrial F1 complex, O subunit	ENSG00000241837	9	12	5	14	10	Cytoplasm	transporter
ATP5S	ATP synthase, H+ transporting, mitochondrial Fo complex subunit s (factor B)	ENSG00000125375	217	435	454	657	440.75	Cytoplasm	transporter
ATP6V0D1	ATPase H+ transporting V0 subunit d1	ENSG00000159720	20	49	127	38	58.5	Cytoplasm	transporter
ATP6V0E1	ATPase H+ transporting V0 subunit e1	ENSG00000113732	25	40	30	62	39.25	Cytoplasm	transporter
ATP6V1D	ATPase H+ transporting V1 subunit D	ENSG00000100554	63	49	44	116	68	Cytoplasm	transporter
ATP6V1E1	ATPase H+ transporting V1 subunit E1	ENSG00000131100	27	27	18	24	24	Cytoplasm	transporter
ATP6V1F	ATPase H+ transporting V1 subunit F	ENSG00000128524	201	330	373	310	303.5	Cytoplasm	enzyme
ATP6V1G1	ATPase H+ transporting V1 subunit G1	ENSG00000136888	38	6	8	12	16	Cytoplasm	transporter
ATP9B	ATPase phospholipid transporting 9B (putative)	ENSG00000166377	34	30	6	77	36.75	Cytoplasm	transporter
ATR	ATR serine/threonine kinase	ENSG00000175054	6	12	20	10	12	Nucleus	kinase
ATRX	ATRX, chromatin remodeler	ENSG00000085224	482	1199	361	1261	825.75	Nucleus	transcription regulator
ATXN2	ataxin 2	ENSG00000204842	17	73	16	78	46	Nucleus	other
ATXN3	ataxin 3	ENSG00000066427	22	211	55	148	109	Nucleus	peptidase
AURKA	aurora kinase A	ENSG00000087586	83	113	28	200	106	Nucleus	kinase
AZIN1	antizyme inhibitor 1	ENSG00000155096	151	176	48	47	105.5	Cytoplasm	enzyme
B2M	beta-2-microglobulin	ENSG00000166710	130	229	90	217	166.5	Plasma Membrane	transmembrane receptor
B4GALT3	beta-1,4-galactosyltransferase 3	ENSG00000158850	990	1384	2440	2015	1707.25	Cytoplasm	enzyme
BABAM1	BRISC and BRCA1 A complex member 1	ENSG00000105393	206	104	761	618	422.25	Nucleus	other
BACH1	BTB domain and CNC homolog 1 [Source:HGNC Symbol	ENSG00000156273	9	48	22	53	33
BAG1	BCL2 associated athanogene 1	ENSG00000107262	1353	2583	1745	2417	2024.5	Cytoplasm	other
BAG6	BCL2 associated athanogene 6	ENSG00000204463	275	463	562	558	464.5	Nucleus	enzyme
BARD1	BRCA1 associated RING domain 1	ENSG00000138376	242	370	134	313	264.75	Nucleus	transcription regulator
BAZ1A	bromodomain adjacent to zinc finger domain 1A	ENSG00000198604	88	246	51	523	227	Nucleus	other
BAZ1B	bromodomain adjacent to zinc finger domain 1B	ENSG00000009954	55	108	53	74	72.5	Nucleus	transcription regulator
BAZ2B	bromodomain adjacent to zinc finger domain 2B	ENSG00000123636	22	135	92	179	107	Extracellular Space	other
BBOF1	basal body orientation factor 1	ENSG00000119636	1376	2590	1194	2659	1954.75	Cytoplasm	other
BCAP29	B-cell receptor-associated protein 29	ENSG00000075790	17	84	19	31	37.75	Cytoplasm	transporter
BCL2L1	BCL2 like 1	ENSG00000171552	1607	2295	4398	3235	2883.75	Cytoplasm	other
BCL2L13	BCL2 like 13	ENSG00000099968	1061	996	1028	2736	1455.25	Cytoplasm	other
BCLAF1	BCL2 associated transcription factor 1	ENSG00000029363	50	178	50	106	96	Nucleus	transcription regulator
BDP1	B double prime 1, subunit of RNA polymerase III transcription initiation factor IIIB	ENSG00000145734	277	704	238	569	447	Nucleus	transcription regulator
BECN1	beclin 1	ENSG00000126581	309	715	566	1067	664.25	Cytoplasm	other
BEST3	bestrophin 3	ENSG00000127325	18	18	16	47	24.75	Nucleus	ion channel
BIRC2	baculoviral IAP repeat containing 2	ENSG00000110330	1245	736	487	776	811	Cytoplasm	enzyme
BIRC6	baculoviral IAP repeat containing 6	ENSG00000115760	18	82	62	61	55.75	Cytoplasm	enzyme
BLOC1S1	biogenesis of lysosomal organelles complex 1 subunit 1	ENSG00000135441	9	7	21	9	11.5	Cytoplasm	other
BLOC1S2	biogenesis of lysosomal organelles complex 1 subunit 2	ENSG00000196072	50	47	66	63	56.5	Cytoplasm	other
BLOC1S6	biogenesis of lysosomal organelles complex 1 subunit 6	ENSG00000104164	877	1292	835	2394	1349.5	Cytoplasm	other
BLVRB	biliverdin reductase B	ENSG00000090013	7468	1516	21280	9523	9946.75	Cytoplasm	enzyme
BMP2K	BMP2 inducible kinase	ENSG00000138756	15	103	48	257	105.75	Nucleus	kinase
BNIP3L	BCL2 interacting protein 3 like	ENSG00000104765	57752	75833	41678	117405	73167	Cytoplasm	other
BOD1L1	biorientation of chromosomes in cell division 1 like 1	ENSG00000038219	12	57	6	21	24	Nucleus	other
BOLA3	bolA family member 3	ENSG00000163170	27	14	14	22	19.25	Other	other
BPGM	bisphosphoglycerate mutase	ENSG00000172331	3332	2471	1895	4197	2973.75	Extracellular Space	phosphatase
BPTF	bromodomain PHD finger transcription factor	ENSG00000171634	465	1054	487	1230	809	Nucleus	transcription regulator
BRAP	BRCA1 associated protein	ENSG00000089234	29	48	80	62	54.75	Cytoplasm	enzyme
BRCA1	BRCA1, DNA repair associated	ENSG00000012048	37	57	63	68	56.25	Nucleus	transcription regulator
BRCA2	BRCA2, DNA repair associated	ENSG00000139618	86	75	24	122	76.75	Nucleus	transcription regulator
BRD4	bromodomain containing 4	ENSG00000141867	317	380	361	548	401.5	Nucleus	kinase
BRIP1	BRCA1 interacting protein C-terminal helicase 1	ENSG00000136492	18	99	12	103	58	Nucleus	enzyme
BRK1	BRICK1, SCAR/WAVE actin nucleating complex subunit	ENSG00000254999	470	586	344	686	521.5	Cytoplasm	other
BROX	BRO1 domain and CAAX motif containing	ENSG00000162819	154	382	79	151	191.5	Cytoplasm	other
BRWD1	bromodomain and WD repeat domain containing 1	ENSG00000185658	81	276	64	218	159.75	Nucleus	transcription regulator
BRWD3	bromodomain and WD repeat domain containing 3	ENSG00000165288	56	8	12	91	41.75	Other	other
BSCL2	BSCL2, seipin lipid droplet biogenesis associated	ENSG00000168000	5	7	10	5	6.75	Cytoplasm	other
BSDC1	BSD domain containing 1	ENSG00000160058	67	141	120	251	144.75	Other	other
BSG	basigin (Ok blood group)	ENSG00000172270	4768	1424	27938	6093	10055.8	Plasma Membrane	transporter
BTF3	basic transcription factor 3	ENSG00000145741	11853	10788	10013	12543	11299.2	Nucleus	transcription regulator
BTNL10	butyrophilin like 10 [Source:HGNC Symbol	ENSG00000215811	6	35	58	7	26.5
BUD31	BUD31 homolog	ENSG00000106245	47	97	114	81	84.75	Nucleus	transcription regulator
C11orf21	chromosome 11 open reading frame 21	ENSG00000110665	14	74	155	131	93.5	Cytoplasm	other
C11orf58	chromosome 11 open reading frame 58	ENSG00000110696	425	443	299	754	480.25	Other	other
C12orf10	chromosome 12 open reading frame 10	ENSG00000139637	121	67	359	100	161.75	Nucleus	other
C12orf29	chromosome 12 open reading frame 29	ENSG00000133641	111	241	204	291	211.75	Other	other
C14orf119	chromosome 14 open reading frame 119	ENSG00000179933	59	73	45	41	54.5	Other	other
C14orf2	chromosome 14 open reading frame 2	ENSG00000156411	25	30	42	12	27.25	Cytoplasm	other
C17orf99	chromosome 17 open reading frame 99 [Source:HGNC Symbol	ENSG00000187997	50	51	118	165	96
C18orf8	chromosome 18 open reading frame 8	ENSG00000141452	25	19	6	62	28	Cytoplasm	other
C19orf43	chromosome 19 open reading frame 43	ENSG00000123144	14	8	28	13	15.75	Nucleus	other
C19orf53	chromosome 19 open reading frame 53	ENSG00000104979	84	116	159	88	111.75	Other	other
C1D	C1D nuclear receptor corepressor	ENSG00000197223	94	74	86	139	98.25	Nucleus	transcription regulator
C1GALT1	core 1 synthase, glycoprotein-N-acetylgalactosamine 3-beta-galactosyltransferase 1	ENSG00000106392	38	15	23	93	42.25	Plasma Membrane	enzyme
C1orf105	chromosome 1 open reading frame 105	ENSG00000180999	149	159	94	147	137.25	Other	other
C1orf27	chromosome 1 open reading frame 27	ENSG00000157181	6	22	12	9	12.25	Other	other
C1orf43	chromosome 1 open reading frame 43 [Source:HGNC Symbol	ENSG00000143612	143	243	357	624	341.75
C20orf196	chromosome 20 open reading frame 196	ENSG00000171984	53	327	363	490	308.25	Other	other
C2orf88	chromosome 2 open reading frame 88	ENSG00000187699	129	158	131	129	136.75	Other	other
C3orf58	chromosome 3 open reading frame 58	ENSG00000181744	42	42	8	96	47	Cytoplasm	other
C4orf45	chromosome 4 open reading frame 45	ENSG00000164123	10	15	5	12	10.5	Other	other
C6orf106	chromosome 6 open reading frame 106	ENSG00000196821	60	31	41	8	35	Other	other
C6orf48	chromosome 6 open reading frame 48	ENSG00000204387	71	181	111	133	124	Other	other
C6orf62	chromosome 6 open reading frame 62	ENSG00000112308	1001	1409	556	1329	1073.75	Other	other
C6orf89	chromosome 6 open reading frame 89	ENSG00000198663	22	73	116	113	81	Cytoplasm	other
C7orf73	chromosome 7 open reading frame 73	ENSG00000243317	5417	4631	2763	6457	4817	Other	other
C9orf153	chromosome 9 open reading frame 153 [Source:HGNC Symbol	ENSG00000187753	31	8	29	51	29.75
C9orf78	chromosome 9 open reading frame 78	ENSG00000136819	10970	11890	19327	17692	14969.8	Other	other
CA1	carbonic anhydrase 1	ENSG00000133742	17331	8796	5009	12246	10845.5	Cytoplasm	enzyme
CA2	carbonic anhydrase 2	ENSG00000104267	70	124	54	107	88.75	Cytoplasm	enzyme
CALCOCO1	calcium binding and coiled-coil domain 1	ENSG00000012822	7	28	141	57	58.25	Nucleus	transcription regulator
CALCOCO2	calcium binding and coiled-coil domain 2	ENSG00000136436	544	757	582	527	602.5	Nucleus	other
CALM1 (includes others)	calmodulin 1	ENSG00000143933	277	356	301	298	308	Cytoplasm	other
CALM3	calmodulin 3 [Source:HGNC Symbol	ENSG00000160014	351	149	195	197	223
CALR	calreticulin	ENSG00000179218	7	14	8	9	9.5	Cytoplasm	transcription regulator
CAMKMT	calmodulin-lysine N-methyltransferase	ENSG00000143919	21	6	9	8	11	Nucleus	enzyme
CANX	calnexin	ENSG00000127022	8	24	13	16	15.25	Cytoplasm	other
CAPN5	calpain 5	ENSG00000149260	26	47	96	77	61.5	Cytoplasm	peptidase
CAPNS1	calpain small subunit 1	ENSG00000126247	27	68	43	26	41	Cytoplasm	peptidase
CAPRIN2	caprin family member 2	ENSG00000110888	326	304	218	319	291.75	Cytoplasm	other
CARD8	caspase recruitment domain family member 8	ENSG00000105483	143	497	194	351	296.25	Nucleus	other
CARHSP1	calcium regulated heat stable protein 1	ENSG00000153048	48	28	399	133	152	Cytoplasm	other
CASC3	cancer susceptibility candidate 3	ENSG00000108349	235	273	165	180	213.25	Nucleus	other
CASC4	cancer susceptibility candidate 4	ENSG00000166734	54	175	95	152	119	Cytoplasm	other
CASP8AP2	caspase 8 associated protein 2	ENSG00000118412	35	160	22	275	123	Nucleus	transcription regulator
CAST	calpastatin	ENSG00000153113	13	49	9	9	20	Cytoplasm	peptidase
CAT	catalase	ENSG00000121691	464	286	179	554	370.75	Cytoplasm	enzyme
CBX3	chromobox 3	ENSG00000122565	58	75	41	74	62	Nucleus	transcription regulator
CCAR1	cell division cycle and apoptosis regulator 1	ENSG00000060339	645	1566	690	1657	1139.5	Nucleus	transcription regulator
CCDC14	coiled-coil domain containing 14	ENSG00000175455	50	139	82	84	88.75	Cytoplasm	other
CCDC144B	coiled-coil domain containing 144B (pseudogene) [Source:HGNC Symbol	ENSG00000154874	18	162	34	157	92.75
CCDC144CP	coiled-coil domain containing 144C, pseudogene [Source:HGNC Symbol	ENSG00000154898	116	311	95	280	200.5
CCDC15	coiled-coil domain containing 15	ENSG00000149548	159	350	139	283	232.75	Cytoplasm	other
CCDC18	coiled-coil domain containing 18	ENSG00000122483	1297	3661	1559	3729	2561.5	Other	other
CCDC186	coiled-coil domain containing 186	ENSG00000165813	145	201	122	281	187.25	Other	other
CCDC25	coiled-coil domain containing 25	ENSG00000147419	22	111	30	107	67.5	Cytoplasm	other
CCDC34	coiled-coil domain containing 34	ENSG00000109881	31	113	44	52	60	Other	other
CCDC66	coiled-coil domain containing 66	ENSG00000180376	375	672	339	868	563.5	Other	other
CCDC7	coiled-coil domain containing 7	ENSG00000150076	31	140	18	76	66.25	Other	other
CCDC7	coiled-coil domain containing 7 [Source:HGNC Symbol	ENSG00000216937	21	116	23	25	46.25
CCDC77	coiled-coil domain containing 77	ENSG00000120647	47	95	16	164	80.5	Cytoplasm	other
CCDC88A	coiled-coil domain containing 88A	ENSG00000115355	220	473	147	556	349	Cytoplasm	other
CCDC90B	coiled-coil domain containing 90B	ENSG00000137500	162	338	109	245	213.5	Cytoplasm	other
CCDC91	coiled-coil domain containing 91	ENSG00000123106	301	476	177	470	356	Other	other
CCNDBP1	cyclin D1 binding protein 1	ENSG00000166946	178	101	140	137	139	Nucleus	other
CCNG1	cyclin G1	ENSG00000113328	30	128	62	374	148.5	Nucleus	other
CCNI	cyclin I	ENSG00000118816	2313	2444	1338	3313	2352	Other	other
CCRL2	C-C motif chemokine receptor like 2	ENSG00000121797	76	84	40	260	115	Plasma Membrane	G-protein coupled receptor
CCS	copper chaperone for superoxide dismutase	ENSG00000173992	63	33	257	92	111.25	Cytoplasm	enzyme
CCT2	chaperonin containing TCP1 subunit 2	ENSG00000166226	182	317	153	442	273.5	Cytoplasm	kinase
CCT3	chaperonin containing TCP1 subunit 3	ENSG00000163468	13	22	41	46	30.5	Cytoplasm	other
CCT8	chaperonin containing TCP1 subunit 8	ENSG00000156261	22	20	37	19	24.5	Cytoplasm	enzyme
CD2AP	CD2 associated protein	ENSG00000198087	183	232	63	410	222	Cytoplasm	other
CD36	CD36 molecule	ENSG00000135218	126	202	87	184	149.75	Plasma Membrane	transmembrane receptor
CD44	CD44 molecule (Indian blood group)	ENSG00000026508	80	32	71	26	52.25	Plasma Membrane	enzyme
CD46P1	CD46 molecule pseudogene 1 [Source:HGNC Symbol	ENSG00000244703	12	7	5	11	8.75
CD59	CD59 molecule	ENSG00000085063	163	119	48	149	119.75	Plasma Membrane	other
CD82	CD82 molecule	ENSG00000085117	15	195	102	195	126.75	Plasma Membrane	other
CDC26	cell division cycle 26	ENSG00000176386	25	9	55	28	29.25	Other	other
CDC27	cell division cycle 27	ENSG00000004897	1753	3522	1541	3769	2646.25	Nucleus	other
CDC34	cell division cycle 34	ENSG00000099804	225	268	313	425	307.75	Nucleus	enzyme
CDC42	cell division cycle 42	ENSG00000070831	502	298	164	523	371.75	Cytoplasm	enzyme
CDC42BPA	CDC42 binding protein kinase alpha	ENSG00000143776	324	1058	310	1111	700.75	Cytoplasm	kinase
CDC42SE1	CDC42 small effector 1	ENSG00000197622	27	42	24	7	25	Plasma Membrane	other
CDC5L	cell division cycle 5 like	ENSG00000096401	12	35	17	39	25.75	Nucleus	other
CDC73	cell division cycle 73	ENSG00000134371	72	49	40	61	55.5	Nucleus	other
CDIPT	CDP-diacylglycerol-inositol 3-phosphatidyltransferase	ENSG00000103502	46	20	126	72	66	Cytoplasm	enzyme
CDK11B	cyclin dependent kinase 11B	ENSG00000248333	32	72	9	77	47.5	Nucleus	kinase
CDK12	cyclin dependent kinase 12	ENSG00000167258	45	68	34	167	78.5	Nucleus	kinase
CDK13	cyclin dependent kinase 13	ENSG00000065883	38	114	35	169	89	Nucleus	kinase
CDK5RAP2	CDK5 regulatory subunit associated protein 2	ENSG00000136861	99	309	78	33	129.75	Cytoplasm	other
CDK8	cyclin dependent kinase 8	ENSG00000132964	16	57	29	68	42.5	Nucleus	kinase
CDKAL1	CDK5 regulatory subunit associated protein 1 like 1	ENSG00000145996	25	11	7	44	21.75	Cytoplasm	other
CDKL1	cyclin dependent kinase like 1	ENSG00000100490	26	88	63	226	100.75	Nucleus	kinase
CDKN3	cyclin dependent kinase inhibitor 3	ENSG00000100526	14	21	23	48	26.5	Cytoplasm	phosphatase
CDV3	CDV3 homolog	ENSG00000091527	69	89	118	219	123.75	Cytoplasm	other
CDYL	chromodomain protein, Y-like	ENSG00000153046	380	1000	562	878	705	Nucleus	transcription regulator
CEBPZOS	CEBPZ opposite strand [Source:HGNC Symbol	ENSG00000218739	7	13	12	48	20
CELF1	CUGBP, Elav-like family member 1	ENSG00000149187	16	118	53	32	54.75	Cytoplasm	translation regulator
CENPC	centromere protein C	ENSG00000145241	76	158	95	87	104	Nucleus	other
CENPE	centromere protein E	ENSG00000138778	430	1085	329	1280	781	Nucleus	other
CENPF	centromere protein F	ENSG00000117724	120	136	34	193	120.75	Nucleus	other
CENPH	centromere protein H	ENSG00000153044	45	41	20	67	43.25	Nucleus	other
CENPK	centromere protein K	ENSG00000123219	357	707	436	1206	676.5	Nucleus	other
CENPQ	centromere protein Q	ENSG00000031691	8	21	25	7	15.25	Nucleus	other
CENPU	centromere protein U	ENSG00000151725	30	47	13	22	28	Nucleus	other
CEP128	centrosomal protein 128	ENSG00000100629	60	199	63	182	126	Cytoplasm	other
CEP135	centrosomal protein 135	ENSG00000174799	97	417	146	401	265.25	Cytoplasm	other
CEP162	centrosomal protein 162	ENSG00000135315	154	448	157	487	311.5	Nucleus	other
CEP192	centrosomal protein 192	ENSG00000101639	96	203	12	123	108.5	Cytoplasm	other
CEP290	centrosomal protein 290	ENSG00000198707	93	183	42	204	130.5	Cytoplasm	transcription regulator
CEP295	centrosomal protein 295	ENSG00000166004	157	292	58	156	165.75	Cytoplasm	other
CEP350	centrosomal protein 350	ENSG00000135837	134	254	63	325	194	Cytoplasm	other
CEP57	centrosomal protein 57	ENSG00000166037	68	191	35	274	142	Cytoplasm	other
CEP57L1	centrosomal protein 57 like 1	ENSG00000183137	180	304	135	164	195.75	Other	other
CEP63	centrosomal protein 63	ENSG00000182923	22	23	25	51	30.25	Cytoplasm	other
CEP70	centrosomal protein 70	ENSG00000114107	19	83	16	72	47.5	Cytoplasm	other
CEP83	centrosomal protein 83	ENSG00000173588	60	155	83	40	84.5	Extracellular Space	other
CEP85	centrosomal protein 85	ENSG00000130695	42	123	35	105	76.25	Nucleus	other
CEP95	centrosomal protein 95	ENSG00000258890	13	8	13	20	13.5	Cytoplasm	other
CEPT1	choline/ethanolamine phosphotransferase 1	ENSG00000134255	12	147	20	10	47.25	Cytoplasm	enzyme
CETN2	centrin 2	ENSG00000147400	132	122	95	108	114.25	Nucleus	enzyme
CFDP1	craniofacial development protein 1	ENSG00000153774	79	75	67	45	66.5	Extracellular Space	other
CGGBP1	CGG triplet repeat binding protein 1	ENSG00000163320	173	144	174	104	148.75	Nucleus	transcription regulator
CGRRF1	cell growth regulator with ring finger domain 1	ENSG00000100532	26	17	6	40	22.25	Nucleus	other
CH507-513H4.5	OTTHUMG00000189717 (Vega gene) is an external reference matched to Gene ENSG00000281383	ENSG00000281383	19	14	9	22	16
CHAF1A	chromatin assembly factor 1 subunit A	ENSG00000167670	131	290	166	354	235.25	Nucleus	other
CHCHD2	coiled-coil-helix-coiled-coil-helix domain containing 2	ENSG00000106153	25	6	22	6	14.75	Cytoplasm	other
CHCHD3	coiled-coil-helix-coiled-coil-helix domain containing 3	ENSG00000106554	74	81	50	126	82.75	Cytoplasm	transcription regulator
CHD2	chromodomain helicase DNA binding protein 2	ENSG00000173575	1064	1926	1222	2649	1715.25	Nucleus	enzyme
CHD6	chromodomain helicase DNA binding protein 6	ENSG00000124177	46	86	57	118	76.75	Nucleus	enzyme
CHD9	chromodomain helicase DNA binding protein 9	ENSG00000177200	125	220	99	130	143.5	Cytoplasm	other
CHID1	chitinase domain containing 1 [Source:HGNC Symbol	ENSG00000177830	298	186	770	260	378.5
CHMP2A	charged multivesicular body protein 2A	ENSG00000130724	124	68	216	71	119.75	Cytoplasm	other
CHMP3	charged multivesicular body protein 3	ENSG00000115561	129	222	96	296	185.75	Cytoplasm	other
CHMP5	charged multivesicular body protein 5	ENSG00000086065	77	109	23	118	81.75	Cytoplasm	other
CHP1	calcineurin like EF-hand protein 1	ENSG00000187446	351	399	272	239	315.25	Cytoplasm	transporter
CHPT1	choline phosphotransferase 1	ENSG00000111666	191	178	90	249	177	Cytoplasm	enzyme
CIDECP	cell death-inducing DFFA-like effector c pseudogene [Source:HGNC Symbol	ENSG00000186162	57	223	131	231	160.5
CIR1	corepressor interacting with RBPJ, 1	ENSG00000138433	110	105	8	136	89.75	Nucleus	transcription regulator
CIRBP	cold inducible RNA binding protein	ENSG00000099622	18	36	52	55	40.25	Nucleus	translation regulator
CISD2	CDGSH iron sulfur domain 2	ENSG00000145354	62	8	47	58	43.75	Cytoplasm	other
CKAP2	cytoskeleton associated protein 2	ENSG00000136108	44	121	70	51	71.5	Cytoplasm	other
CKAP2L	cytoskeleton associated protein 2 like	ENSG00000169607	42	45	8	101	49	Cytoplasm	other
CKAP5	cytoskeleton associated protein 5	ENSG00000175216	32	66	20	28	36.5	Nucleus	transcription regulator
CLCN3	chloride voltage-gated channel 3	ENSG00000109572	97	147	97	406	186.75	Plasma Membrane	ion channel
CLDND1	claudin domain containing 1	ENSG00000080822	24	36	29	18	26.75	Plasma Membrane	other
CLEC16A	C-type lectin domain family 16 member A	ENSG00000038532	85	53	98	58	73.5	Cytoplasm	other
CLIC1	chloride intracellular channel 1	ENSG00000213719	115	125	95	181	129	Nucleus	ion channel
CLIC2	chloride intracellular channel 2	ENSG00000155962	361	291	85	459	299	Cytoplasm	enzyme
CLIP1	CAP-Gly domain containing linker protein 1	ENSG00000130779	60	156	86	29	82.75	Cytoplasm	other
CLK1	CDC like kinase 1	ENSG00000013441	50	83	51	148	83	Nucleus	kinase
CLK3	CDC like kinase 3	ENSG00000179335	647	577	1430	596	812.5	Nucleus	kinase
CLSPN	claspin	ENSG00000092853	37	48	24	69	44.5	Nucleus	other
CMAS	cytidine monophosphate N-acetylneuraminic acid synthetase	ENSG00000111726	57	18	12	29	29	Nucleus	enzyme
CMB9-22P13.1	OTTHUMG00000186654 (Vega gene) is an external reference matched to Gene ENSG00000173727	ENSG00000173727	22	50	30	53	38.75
CMBL	carboxymethylenebutenolidase homolog	ENSG00000164237	10	117	58	5	47.5	Cytoplasm	enzyme
CMPK1	cytidine/uridine monophosphate kinase 1	ENSG00000162368	36	57	7	32	33	Nucleus	kinase
CMPK2	cytidine/uridine monophosphate kinase 2	ENSG00000134326	45	26	37	16	31	Cytoplasm	kinase
CNBP	CCHC-type zinc finger nucleic acid binding protein	ENSG00000169714	82	132	202	177	148.25	Nucleus	transcription regulator
CNIH3	cornichon family AMPA receptor auxiliary protein 3	ENSG00000143786	109	512	545	472	409.5	Plasma Membrane	transporter
CNPPD1	cyclin Pas1/PHO80 domain containing 1	ENSG00000115649	1238	1486	3154	3003	2220.25	Other	other
CNTLN	centlein	ENSG00000044459	475	1222	426	1370	873.25	Cytoplasm	other
CNTRL	centriolin	ENSG00000119397	87	126	70	124	101.75	Nucleus	transcription regulator
COBLL1	cordon-bleu WH2 repeat protein like 1	ENSG00000082438	42	90	83	41	64	Extracellular Space	other
COG2	component of oligomeric golgi complex 2	ENSG00000135775	31	92	32	96	62.75	Cytoplasm	transporter
COG4	component of oligomeric golgi complex 4	ENSG00000103051	27	52	71	35	46.25	Cytoplasm	transporter
COPA	coatomer protein complex subunit alpha	ENSG00000122218	10	17	23	23	18.25	Cytoplasm	transporter
COPE	coatomer protein complex subunit epsilon	ENSG00000105669	69	15	280	68	108	Cytoplasm	transporter
COPS2	COP9 signalosome subunit 2	ENSG00000166200	81	149	74	492	199	Cytoplasm	other
COPS3	COP9 signalosome subunit 3	ENSG00000141030	461	1257	339	1125	795.5	Cytoplasm	other
COPS6	COP9 signalosome subunit 6	ENSG00000168090	24	42	18	13	24.25	Nucleus	other
COPZ1	coatomer protein complex subunit zeta 1	ENSG00000111481	143	189	201	288	205.25	Cytoplasm	transporter
CORO1C	coronin 1C	ENSG00000110880	150	307	134	613	301	Cytoplasm	other
COX4I1	cytochrome c oxidase subunit 4I1	ENSG00000131143	33	17	71	158	69.75	Cytoplasm	enzyme
COX6A1	cytochrome c oxidase subunit 6A1	ENSG00000111775	163	209	269	205	211.5	Cytoplasm	enzyme
COX6B1	cytochrome c oxidase subunit 6B1	ENSG00000126267	1800	2198	2828	2761	2396.75	Cytoplasm	enzyme
COX6C	cytochrome c oxidase subunit 6C	ENSG00000164919	8	11	45	22	21.5	Cytoplasm	enzyme
COX7A2	cytochrome c oxidase subunit 7A2	ENSG00000112695	165	136	173	202	169	Cytoplasm	enzyme
COX7A2L	cytochrome c oxidase subunit 7A2 like	ENSG00000115944	10	47	147	59	65.75	Cytoplasm	enzyme
COX7B	cytochrome c oxidase subunit 7B	ENSG00000131174	103	68	90	98	89.75	Cytoplasm	enzyme
COX7C	cytochrome c oxidase subunit 7C	ENSG00000127184	46	44	75	87	63	Cytoplasm	enzyme
CPEB4	cytoplasmic polyadenylation element binding protein 4	ENSG00000113742	181	137	119	203	160	Plasma Membrane	other
CPNE1	copine 1	ENSG00000214078	28	6	56	30	30	Nucleus	transporter
CPOX	coproporphyrinogen oxidase	ENSG00000080819	11	8	27	41	21.75	Cytoplasm	enzyme
CPSF2	cleavage and polyadenylation specific factor 2	ENSG00000165934	19	33	10	53	28.75	Nucleus	other
CPSF6	cleavage and polyadenylation specific factor 6	ENSG00000111605	39	94	107	251	122.75	Nucleus	other
CR1	complement component 3b/4b receptor 1 (Knops blood group)	ENSG00000203710	78	89	92	239	124.5	Plasma Membrane	transmembrane receptor
CR1L	complement component 3b/4b receptor 1-like	ENSG00000197721	560	991	576	910	759.25	Plasma Membrane	other
CRAT	carnitine O-acetyltransferase	ENSG00000095321	15	12	64	7	24.5	Cytoplasm	enzyme
CRBN	cereblon	ENSG00000113851	35	32	12	20	24.75	Cytoplasm	enzyme
CREB1	cAMP responsive element binding protein 1	ENSG00000118260	97	10	76	175	89.5	Nucleus	transcription regulator
CREBBP	CREB binding protein	ENSG00000005339	47	112	79	74	78	Nucleus	transcription regulator
CREBL2	cAMP responsive element binding protein like 2	ENSG00000111269	47	162	103	112	106	Nucleus	transcription regulator
CREBRF	CREB3 regulatory factor	ENSG00000164463	24	27	30	13	23.5	Nucleus	other
CREG1	cellular repressor of E1A stimulated genes 1	ENSG00000143162	138	53	37	107	83.75	Nucleus	transcription regulator
CREM	cAMP responsive element modulator	ENSG00000095794	16	6	8	25	13.75	Nucleus	transcription regulator
CRIPT	CXXC repeat containing interactor of PDZ3 domain	ENSG00000119878	31	16	12	7	16.5	Cytoplasm	other
CRKL	CRK like proto-oncogene, adaptor protein	ENSG00000099942	12	29	26	130	49.25	Cytoplasm	kinase
CSDE1	cold shock domain containing E1	ENSG00000009307	1176	2003	1119	1489	1446.75	Cytoplasm	enzyme
CSNK1G3	casein kinase 1 gamma 3	ENSG00000151292	122	165	54	252	148.25	Cytoplasm	kinase
CSNK2A1	casein kinase 2 alpha 1	ENSG00000101266	33	103	111	325	143	Nucleus	kinase
CSPP1	centrosome and spindle pole associated protein 1	ENSG00000104218	423	947	365	1115	712.5	Cytoplasm	other
CTA-242H14.1	OTTHUMG00000157986 (Vega gene) is an external reference matched to Gene ENSG00000239622	ENSG00000239622	6	7	7	19	9.75
CTA-331P3.1	OTTHUMG00000175938 (Vega gene) is an external reference matched to Gene ENSG00000260188	ENSG00000260188	35	44	58	19	39
CTA-363E6.6	OTTHUMG00000177225 (Vega gene) is an external reference matched to Gene ENSG00000260592	ENSG00000260592	680	1392	1124	1735	1232.75
CTA-392E5.1	OTTHUMG00000163604 (Vega gene) is an external reference matched to Gene ENSG00000253154	ENSG00000253154	78	40	17	45	45
CTC-510F12.2	OTTHUMG00000180827 (Vega gene) is an external reference matched to Gene ENSG00000267082	ENSG00000267082	22	80	77	202	95.25
CTC-756D1.3	OTTHUMG00000163864 (Vega gene) is an external reference matched to Gene ENSG00000253986	ENSG00000253986	97	141	143	278	164.75
CTCF	CCCTC-binding factor	ENSG00000102974	48	196	54	183	120.25	Nucleus	transcription regulator
CTD-2287O16.1	OTTHUMG00000157822 (Vega gene) is an external reference matched to Gene ENSG00000185641	ENSG00000185641	7	8	13	11	9.75
CTD-2336O2.1	OTTHUMG00000163625 (Vega gene) is an external reference matched to Gene ENSG00000253982	ENSG00000253982	61	63	7	209	85
CTD-2561J22.5	OTTHUMG00000182846 (Vega gene) is an external reference matched to Gene ENSG00000268119	ENSG00000268119	78	285	166	448	244.25
CTDNEP1	CTD nuclear envelope phosphatase 1	ENSG00000175826	7	8	18	7	10	Extracellular Space	phosphatase
CTDSP2	CTD small phosphatase 2	ENSG00000175215	77	37	153	194	115.25	Nucleus	phosphatase
CTDSPL2	CTD small phosphatase like 2	ENSG00000137770	38	32	27	19	29	Nucleus	phosphatase
CTNNA1	catenin alpha 1	ENSG00000044115	53	7	34	40	33.5	Plasma Membrane	other
CTNNBL1	catenin beta like 1	ENSG00000132792	14	19	23	33	22.25	Nucleus	other
CTSB	cathepsin B	ENSG00000164733	1055	416	1409	1663	1135.75	Cytoplasm	peptidase
CTSE	cathepsin E	ENSG00000196188	305	427	262	356	337.5	Cytoplasm	peptidase
CUL4A	cullin 4A	ENSG00000139842	52	99	105	94	87.5	Nucleus	other
CWC25	CWC25 spliceosome associated protein homolog	ENSG00000273559	6	6	5	5	5.5	Nucleus	other
CWC27	CWC27 spliceosome associated protein homolog	ENSG00000153015	52	77	22	88	59.75	Nucleus	enzyme
CWF19L2	CWF19-like 2, cell cycle control (S. pombe)	ENSG00000152404	104	98	62	89	88.25	Other	other
CYB561A3	cytochrome b561 family member A3	ENSG00000162144	18	8	97	19	35.5	Cytoplasm	other
CYB5A	cytochrome b5 type A	ENSG00000166347	48	19	55	11	33.25	Cytoplasm	enzyme
CYB5R1	cytochrome b5 reductase 1	ENSG00000159348	99	96	152	72	104.75	Cytoplasm	enzyme
CYB5R3	cytochrome b5 reductase 3	ENSG00000100243	29	24	84	18	38.75	Cytoplasm	enzyme
CYBRD1	cytochrome b reductase 1	ENSG00000071967	103	124	61	224	128	Cytoplasm	enzyme
CYSTM1	cysteine rich transmembrane module containing 1	ENSG00000120306	1764	943	578	723	1002	Cytoplasm	other
DAAM1	dishevelled associated activator of morphogenesis 1	ENSG00000100592	8	6	12	41	16.75	Cytoplasm	other
DAD1	defender against cell death 1	ENSG00000129562	85	80	77	183	106.25	Cytoplasm	other
DAP	death associated protein	ENSG00000112977	19	27	74	12	33	Cytoplasm	transcription regulator
DAP3	death associated protein 3	ENSG00000132676	37	178	68	21	76	Cytoplasm	other
DAZAP2	DAZ associated protein 2	ENSG00000183283	192	460	325	478	363.75	Nucleus	other
DBF4	DBF4 zinc finger	ENSG00000006634	60	79	67	96	75.5	Nucleus	kinase
DCAF11	DDB1 and CUL4 associated factor 11	ENSG00000100897	336	527	566	1171	650	Nucleus	other
DCAF12	DDB1 and CUL4 associated factor 12	ENSG00000198876	8207	3477	5826	5766	5819	Cytoplasm	other
DCAF6	DDB1 and CUL4 associated factor 6	ENSG00000143164	354	610	321	489	443.5	Nucleus	transcription regulator
DCAF7	DDB1 and CUL4 associated factor 7	ENSG00000136485	8	6	35	13	15.5	Cytoplasm	other
DCAF8	DDB1 and CUL4 associated factor 8	ENSG00000132716	6	12	83	72	43.25	Other	other
DCK	deoxycytidine kinase	ENSG00000156136	16	9	8	19	13	Nucleus	kinase
DCP1B	decapping mRNA 1B	ENSG00000151065	52	55	127	108	85.5	Cytoplasm	other
DCP2	decapping mRNA 2	ENSG00000172795	227	188	127	454	249	Nucleus	enzyme
DCTN2	dynactin subunit 2	ENSG00000175203	26	10	62	56	38.5	Cytoplasm	other
DCTN3	dynactin subunit 3	ENSG00000137100	54	16	114	84	67	Nucleus	other
DCTN4	dynactin subunit 4	ENSG00000132912	18	59	16	20	28.25	Nucleus	other
DCUN1D1	defective in cullin neddylation 1 domain containing 1	ENSG00000043093	2411	4027	1378	4329	3036.25	Nucleus	other
DCUN1D4	defective in cullin neddylation 1 domain containing 4	ENSG00000109184	80	93	42	198	103.25	Nucleus	other
DDB1	damage specific DNA binding protein 1	ENSG00000167986	318	301	719	517	463.75	Nucleus	other
DDI2	DNA damage inducible 1 homolog 2	ENSG00000197312	32	55	25	59	42.75	Plasma Membrane	transporter
DDX10	DEAD-box helicase 10	ENSG00000178105	20	101	14	46	45.25	Nucleus	enzyme
DDX21	DEAD-box helicase 21	ENSG00000165732	245	594	132	344	328.75	Nucleus	enzyme
DDX3X	DEAD-box helicase 3, X-linked	ENSG00000215301	102	172	102	27	100.75	Cytoplasm	enzyme
DDX46	DEAD-box helicase 46	ENSG00000145833	30	9	31	81	37.75	Nucleus	enzyme
DDX49	DEAD-box helicase 49	ENSG00000105671	63	16	238	169	121.5	Nucleus	enzyme
DDX6	DEAD-box helicase 6	ENSG00000110367	632	1040	527	962	790.25	Nucleus	enzyme
DEK	DEK proto-oncogene	ENSG00000124795	915	2373	793	1916	1499.25	Nucleus	transcription regulator
DENND1A	DENN domain containing 1A	ENSG00000119522	132	247	224	256	214.75	Plasma Membrane	other
DENND1B	DENN domain containing 1B	ENSG00000213047	26	18	10	25	19.75	Other	other
DENND4A	DENN domain containing 4A	ENSG00000174485	140	323	134	350	236.75	Nucleus	other
DHPS	deoxyhypusine synthase	ENSG00000095059	42	12	49	14	29.25	Cytoplasm	enzyme
DHX29	DEAH-box helicase 29	ENSG00000067248	60	160	67	243	132.5	Cytoplasm	enzyme
DHX40	DEAH-box helicase 40	ENSG00000108406	84	212	66	88	112.5	Other	enzyme
DIAPH3	diaphanous related formin 3	ENSG00000139734	33	47	12	45	34.25	Cytoplasm	enzyme
DLEU1	deleted in lymphocytic leukemia 1 (non-protein coding)	ENSG00000176124	17	11	27	15	17.5	Other	other
DLEU2	deleted in lymphocytic leukemia 2 (non-protein coding)	ENSG00000231607	226	470	161	603	365	Other	other
DLG1	discs large MAGUK scaffold protein 1	ENSG00000075711	58	225	74	206	140.75	Plasma Membrane	kinase
DLGAP1-AS1	DLGAP1 antisense RNA 1 [Source:HGNC Symbol	ENSG00000177337	51	39	60	63	53.25
DLGAP5	DLG associated protein 5	ENSG00000126787	117	156	44	73	97.5	Nucleus	phosphatase
DMTN	dematin actin binding protein	ENSG00000158856	310	714	1002	1406	858	Plasma Membrane	other
DNA2	DNA replication helicase/nuclease 2	ENSG00000138346	32	66	5	84	46.75	Cytoplasm	enzyme
DNAJA1	DnaJ heat shock protein family (Hsp40) member A1	ENSG00000086061	135	337	95	200	191.75	Nucleus	other
DNAJA2	DnaJ heat shock protein family (Hsp40) member A2	ENSG00000069345	41	10	99	33	45.75	Nucleus	enzyme
DNAJA4	DnaJ heat shock protein family (Hsp40) member A4	ENSG00000140403	107	274	134	106	155.25	Nucleus	other
DNAJB12	DnaJ heat shock protein family (Hsp40) member B12	ENSG00000148719	14	57	134	182	96.75	Cytoplasm	other
DNAJB2	DnaJ heat shock protein family (Hsp40) member B2	ENSG00000135924	74	87	187	176	131	Nucleus	other
DNAJB4	DnaJ heat shock protein family (Hsp40) member B4	ENSG00000162616	313	432	273	420	359.5	Nucleus	other
DNAJB6	DnaJ heat shock protein family (Hsp40) member B6	ENSG00000105993	14	59	21	32	31.5	Nucleus	transcription regulator
DNAJC2	DnaJ heat shock protein family (Hsp40) member C2	ENSG00000105821	493	742	456	1271	740.5	Nucleus	other
DNAJC21	DnaJ heat shock protein family (Hsp40) member C21	ENSG00000168724	8	11	31	28	19.5	Other	other
DNAJC6	DnaJ heat shock protein family (Hsp40) member C6	ENSG00000116675	39	13	44	64	40	Cytoplasm	other
DNASE2	deoxyribonuclease II, lysosomal	ENSG00000105612	105	177	450	317	262.25	Cytoplasm	enzyme
DNMT1	DNA (cytosine-5-)-methyltransferase 1	ENSG00000130816	439	1068	527	960	748.5	Nucleus	enzyme
DNTTIP2	deoxynucleotidyltransferase terminal interacting protein 2	ENSG00000067334	50	148	35	148	95.25	Nucleus	other
DOCK6	dedicator of cytokinesis 6	ENSG00000130158	22	37	53	99	52.75	Cytoplasm	other
DPCD	deleted in primary ciliary dyskinesia homolog (mouse)	ENSG00000166171	318	457	581	393	437.25	Nucleus	other
DPH3	diphthamide biosynthesis 3	ENSG00000154813	73	29	32	75	52.25	Cytoplasm	other
DPM2	dolichyl-phosphate mannosyltransferase polypeptide 2, regulatory subunit	ENSG00000136908	4520	6439	7374	7037	6342.5	Cytoplasm	enzyme
DRG1	developmentally regulated GTP binding protein 1	ENSG00000185721	28	33	53	20	33.5	Cytoplasm	other
DYNC1I2	dynein cytoplasmic 1 intermediate chain 2	ENSG00000077380	12	77	9	45	35.75	Cytoplasm	other
DYNC1LI1	dynein cytoplasmic 1 light intermediate chain 1	ENSG00000144635	25	34	8	57	31	Cytoplasm	other
DYNLL1	dynein light chain LC8-type 1	ENSG00000088986	75	116	124	98	103.25	Cytoplasm	other
DYNLL2	dynein light chain LC8-type 2	ENSG00000264364	17	28	13	34	23	Cytoplasm	other
DYNLRB1	dynein light chain roadblock-type 1	ENSG00000125971	165	222	193	180	190	Cytoplasm	other
DZIP3	DAZ interacting zinc finger protein 3	ENSG00000198919	156	313	252	298	254.75	Cytoplasm	enzyme
E2F2	E2F transcription factor 2	ENSG00000007968	179	371	737	810	524.25	Nucleus	transcription regulator
E2F4	E2F transcription factor 4	ENSG00000205250	35	41	26	51	38.25	Nucleus	transcription regulator
EAPP	E2F associated phosphoprotein	ENSG00000129518	17	42	29	102	47.5	Cytoplasm	other
ECH1	enoyl-CoA hydratase 1	ENSG00000104823	29	22	57	9	29.25	Cytoplasm	enzyme
ECSIT	ECSIT signalling integrator	ENSG00000130159	192	61	1057	221	382.75	Nucleus	transcription regulator
ECT2	epithelial cell transforming 2	ENSG00000114346	34	197	84	115	107.5	Cytoplasm	other
EDF1	endothelial differentiation related factor 1	ENSG00000107223	44	44	105	103	74	Nucleus	transcription regulator
EEA1	early endosome antigen 1	ENSG00000102189	129	261	98	245	183.25	Cytoplasm	other
EED	embryonic ectoderm development	ENSG00000074266	29	5	16	47	24.25	Nucleus	transcription regulator
EEF1A1	eukaryotic translation elongation factor 1 alpha 1	ENSG00000156508	777	761	799	628	741.25	Cytoplasm	translation regulator
EEF1B2	eukaryotic translation elongation factor 1 beta 2	ENSG00000114942	27	42	44	10	30.75	Cytoplasm	translation regulator
EEF1D	eukaryotic translation elongation factor 1 delta	ENSG00000104529	20	15	68	29	33	Cytoplasm	translation regulator
EEF2	eukaryotic translation elongation factor 2	ENSG00000167658	169	89	269	182	177.25	Cytoplasm	translation regulator
EFCAB13	EF-hand calcium binding domain 13	ENSG00000178852	142	150	31	126	112.25	Nucleus	other
EFCAB14	EF-hand calcium binding domain 14	ENSG00000159658	14	6	7	22	12.25	Other	other
EID1	EP300 interacting inhibitor of differentiation 1	ENSG00000255302	55	10	35	122	55.5	Nucleus	transcription regulator
EIF1	eukaryotic translation initiation factor 1	ENSG00000173812	10835	2623	13326	7761	8636.25	Cytoplasm	translation regulator
EIF1AX	eukaryotic translation initiation factor 1A, X-linked	ENSG00000173674	25	31	6	9	17.75	Cytoplasm	translation regulator
EIF1B	eukaryotic translation initiation factor 1B	ENSG00000114784	1707	1923	1372	2779	1945.25	Cytoplasm	translation regulator
EIF2A	eukaryotic translation initiation factor 2A	ENSG00000144895	23	38	12	9	20.5	Cytoplasm	translation regulator
EIF2AK1	eukaryotic translation initiation factor 2 alpha kinase 1	ENSG00000086232	571	819	781	914	771.25	Cytoplasm	kinase
EIF2D	eukaryotic translation initiation factor 2D	ENSG00000143486	67	42	207	235	137.75	Cytoplasm	transporter
EIF2S2	eukaryotic translation initiation factor 2 subunit beta	ENSG00000125977	114	159	70	129	118	Cytoplasm	translation regulator
EIF3A	eukaryotic translation initiation factor 3 subunit A	ENSG00000107581	100	177	61	140	119.5	Cytoplasm	other
EIF3B	eukaryotic translation initiation factor 3 subunit B	ENSG00000106263	39	19	62	44	41	Cytoplasm	translation regulator
EIF3D	eukaryotic translation initiation factor 3 subunit D	ENSG00000100353	16	65	149	98	82	Cytoplasm	other
EIF3E	eukaryotic translation initiation factor 3 subunit E	ENSG00000104408	23	23	7	12	16.25	Cytoplasm	other
EIF3H	eukaryotic translation initiation factor 3 subunit H	ENSG00000147677	265	313	307	327	303	Cytoplasm	other
EIF3J	eukaryotic translation initiation factor 3 subunit J	ENSG00000104131	1940	3686	1417	4530	2893.25	Cytoplasm	translation regulator
EIF3K	eukaryotic translation initiation factor 3 subunit K	ENSG00000178982	337	332	374	326	342.25	Cytoplasm	translation regulator
EIF3L	eukaryotic translation initiation factor 3 subunit L	ENSG00000100129	5	16	87	78	46.5	Cytoplasm	other
EIF4E2	eukaryotic translation initiation factor 4E family member 2	ENSG00000135930	30	5	6	25	16.5	Cytoplasm	translation regulator
EIF4EBP2	eukaryotic translation initiation factor 4E binding protein 2	ENSG00000148730	98	63	48	89	74.5	Cytoplasm	translation regulator
EIF4G1	eukaryotic translation initiation factor 4 gamma 1	ENSG00000114867	13	30	59	26	32	Cytoplasm	translation regulator
EIF4G2	eukaryotic translation initiation factor 4 gamma 2	ENSG00000110321	16	30	10	14	17.5	Cytoplasm	translation regulator
EIF4G3	eukaryotic translation initiation factor 4 gamma 3	ENSG00000075151	6	29	49	12	24	Cytoplasm	translation regulator
EIF5	eukaryotic translation initiation factor 5	ENSG00000100664	142	446	223	415	306.5	Cytoplasm	translation regulator
EIF5A	eukaryotic translation initiation factor 5A	ENSG00000132507	33	13	65	17	32	Cytoplasm	translation regulator
EIF5B	eukaryotic translation initiation factor 5B	ENSG00000158417	156	158	92	219	156.25	Cytoplasm	translation regulator
ELF1	E74 like ETS transcription factor 1	ENSG00000120690	40	94	47	72	63.25	Nucleus	transcription regulator
ELF2	E74 like ETS transcription factor 2	ENSG00000109381	62	120	8	94	71	Nucleus	transcription regulator
ELL2	elongation factor for RNA polymerase II 2	ENSG00000118985	84	102	16	53	63.75	Nucleus	transcription regulator
ELOF1	elongation factor 1 homolog	ENSG00000130165	1541	1534	2230	1591	1724	Nucleus	other
ELOVL1	ELOVL fatty acid elongase 1	ENSG00000066322	10	53	58	98	54.75	Cytoplasm	enzyme
EMC2	ER membrane protein complex subunit 2	ENSG00000104412	169	274	123	302	217	Nucleus	other
EMC3	ER membrane protein complex subunit 3	ENSG00000125037	4560	6753	6512	8378	6550.75	Nucleus	other
EMID1	EMI domain containing 1	ENSG00000186998	13	16	22	67	29.5	Extracellular Space	other
EMSY	EMSY, BRCA2 interacting transcriptional repressor	ENSG00000158636	7	49	40	98	48.5	Nucleus	other
ENSA	endosulfine alpha	ENSG00000143420	190	355	107	226	219.5	Cytoplasm	transporter
ENTPD5	ectonucleoside triphosphate diphosphohydrolase 5	ENSG00000187097	146	203	232	219	200	Cytoplasm	enzyme
EP300	E1A binding protein p300	ENSG00000100393	144	397	255	367	290.75	Nucleus	transcription regulator
EPB41	erythrocyte membrane protein band 4.1	ENSG00000159023	21722	28900	21677	37160	27364.8	Plasma Membrane	other
EPB41L4A	erythrocyte membrane protein band 4.1 like 4A	ENSG00000129595	11	39	7	18	18.75	Extracellular Space	other
EPB42	erythrocyte membrane protein band 4.2	ENSG00000166947	1242	644	2647	1032	1391.25	Plasma Membrane	transporter
EPC1	enhancer of polycomb homolog 1	ENSG00000120616	12	44	8	68	33	Nucleus	transcription regulator
EPC2	enhancer of polycomb homolog 2	ENSG00000135999	5	22	10	6	10.75	Other	other
EPN2	epsin 2	ENSG00000072134	36	24	23	39	30.5	Cytoplasm	other
EPS15	epidermal growth factor receptor pathway substrate 15	ENSG00000085832	29	37	9	20	23.75	Cytoplasm	other
EPSTI1	epithelial stromal interaction 1 (breast)	ENSG00000133106	66	84	44	45	59.75	Other	other
ERAL1	Era like 12S mitochondrial rRNA chaperone 1	ENSG00000132591	216	203	193	270	220.5	Cytoplasm	other
ERBIN	erbb2 interacting protein	ENSG00000112851	68	199	27	243	134.25	Plasma Membrane	other
ERCC1	ERCC excision repair 1, endonuclease non-catalytic subunit	ENSG00000012061	38	69	165	168	110	Nucleus	enzyme
ERCC2	ERCC excision repair 2, TFIIH core complex helicase subunit	ENSG00000104884	12	39	7	52	27.5	Nucleus	enzyme
ERGIC2	ERGIC and golgi 2	ENSG00000087502	6	72	21	74	43.25	Cytoplasm	other
ERGIC3	ERGIC and golgi 3	ENSG00000125991	339	578	372	530	454.75	Cytoplasm	other
ERICH1	glutamate rich 1	ENSG00000104714	6	21	32	35	23.5	Other	other
ERMAP	erythroblast membrane associated protein (Scianna blood group)	ENSG00000164010	124	114	57	458	188.25	Cytoplasm	other
ERP44	endoplasmic reticulum protein 44	ENSG00000023318	11	5	29	18	15.75	Cytoplasm	enzyme
ESCO1	establishment of sister chromatid cohesion N-acetyltransferase 1	ENSG00000141446	38	118	6	80	60.5	Nucleus	enzyme
ESF1	ESF1 nucleolar pre-rRNA processing protein homolog	ENSG00000089048	6	19	14	74	28.25	Nucleus	other
ESRG	embryonic stem cell related (non-protein coding) [Source:HGNC Symbol	ENSG00000265992	986	500	50	1656	798
ETFA	electron transfer flavoprotein alpha subunit	ENSG00000140374	32	122	69	169	98	Cytoplasm	transporter
ETFB	electron transfer flavoprotein beta subunit	ENSG00000105379	10	19	7	18	13.5	Cytoplasm	transporter
EVI5	ecotropic viral integration site 5	ENSG00000067208	16	98	28	94	59	Cytoplasm	other
EXOC3	exocyst complex component 3	ENSG00000180104	33	9	68	34	36	Plasma Membrane	transporter
EXOC6	exocyst complex component 6	ENSG00000138190	41	41	13	70	41.25	Plasma Membrane	transporter
EXOC7	exocyst complex component 7	ENSG00000182473	360	691	721	797	642.25	Cytoplasm	transporter
EYA3	EYA transcriptional coactivator and phosphatase 3	ENSG00000158161	16	19	16	18	17.25	Nucleus	phosphatase
EZH1	enhancer of zeste 1 polycomb repressive complex 2 subunit	ENSG00000108799	34	15	28	34	27.75	Nucleus	enzyme
EZH2	enhancer of zeste 2 polycomb repressive complex 2 subunit	ENSG00000106462	42	37	16	31	31.5	Nucleus	transcription regulator
FAF1	Fas associated factor 1	ENSG00000185104	50	85	78	38	62.75	Nucleus	other
FAH	fumarylacetoacetate hydrolase	ENSG00000103876	126	188	53	275	160.5	Cytoplasm	enzyme
FAM104A	family with sequence similarity 104 member A	ENSG00000133193	569	163	978	321	507.75	Other	other
FAM104B	family with sequence similarity 104 member B	ENSG00000182518	355	330	297	292	318.5	Other	other
FAM117A	family with sequence similarity 117 member A	ENSG00000121104	44	63	64	122	73.25	Other	transporter
FAM120A	family with sequence similarity 120A	ENSG00000048828	34	33	40	39	36.5	Cytoplasm	other
FAM133B	family with sequence similarity 133 member B	ENSG00000234545	397	813	405	795	602.5	Other	other
FAM134A	family with sequence similarity 134 member A	ENSG00000144567	125	86	175	673	264.75	Other	other
FAM13B	family with sequence similarity 13 member B	ENSG00000031003	5	60	24	54	35.75	Cytoplasm	other
FAM172A	family with sequence similarity 172 member A	ENSG00000113391	8	10	10	37	16.25	Cytoplasm	transcription regulator
FAM177A1	family with sequence similarity 177 member A1	ENSG00000151327	18	5	21	50	23.5	Other	other
FAM179B	family with sequence similarity 179 member B	ENSG00000198718	137	132	69	260	149.5	Extracellular Space	other
FAM192A	family with sequence similarity 192 member A	ENSG00000172775	136	488	215	365	301	Nucleus	other
FAM193B	family with sequence similarity 193 member B	ENSG00000146067	19	31	46	37	33.25	Nucleus	other
FAM19A2	family with sequence similarity 19 member A2, C-C motif chemokine like	ENSG00000198673	11	25	16	74	31.5	Cytoplasm	other
FAM200B	family with sequence similarity 200 member B	ENSG00000237765	141	106	109	226	145.5	Other	other
FAM204A	family with sequence similarity 204 member A	ENSG00000165669	141	172	54	265	158	Other	other
FAM208A	family with sequence similarity 208 member A	ENSG00000163946	13	79	45	44	45.25	Other	other
FAM208B	family with sequence similarity 208 member B	ENSG00000108021	104	338	198	358	249.5	Nucleus	other
FAM210B	family with sequence similarity 210 member B	ENSG00000124098	2570	2643	1781	3794	2697	Extracellular Space	other
FAM214B	family with sequence similarity 214 member B	ENSG00000005238	72	22	207	216	129.25	Nucleus	other
FAM216A	family with sequence similarity 216 member A	ENSG00000204856	7	94	14	58	43.25	Other	other
FAM228B	family with sequence similarity 228 member B	ENSG00000219626	83	89	145	387	176	Other	other
FAM46C	family with sequence similarity 46 member C	ENSG00000183508	5282	6411	4121	9421	6308.75	Extracellular Space	other
FAM53C	family with sequence similarity 53 member C	ENSG00000120709	11	5	71	37	31	Other	other
FAM65C	family with sequence similarity 65 member C	ENSG00000042062	31	37	43	64	43.75	Other	other
FAM76B	family with sequence similarity 76 member B	ENSG00000077458	37	34	30	36	34.25	Nucleus	other
FANK1	fibronectin type III and ankyrin repeat domains 1	ENSG00000203780	14	15	36	60	31.25	Nucleus	transcription regulator
FAU	FAU, ubiquitin like and ribosomal protein S30 fusion	ENSG00000149806	324	285	420	538	391.75	Cytoplasm	other
FAXDC2	fatty acid hydroxylase domain containing 2	ENSG00000170271	1617	9417	5377	15187	7899.5	Other	other
FBXL4	F-box and leucine rich repeat protein 4	ENSG00000112234	32	26	13	22	23.25	Nucleus	enzyme
FBXO48	F-box protein 48 [Source:HGNC Symbol	ENSG00000204923	76	101	74	109	90
FBXO7	F-box protein 7	ENSG00000100225	33258	49934	85246	141951	77597.2	Cytoplasm	enzyme
FBXO9	F-box protein 9	ENSG00000112146	576	1017	777	1380	937.5	Cytoplasm	enzyme
FBXW11	F-box and WD repeat domain containing 11	ENSG00000072803	22	20	19	20	20.25	Cytoplasm	enzyme
FBXW7	F-box and WD repeat domain containing 7	ENSG00000109670	465	1126	297	703	647.75	Nucleus	transcription regulator
FCF1	FCF1 rRNA-processing protein	ENSG00000119616	41	100	56	138	83.75	Nucleus	other
FCHO2	FCH domain only 2	ENSG00000157107	706	1619	642	1676	1160.75	Cytoplasm	other
FDFT1	farnesyl-diphosphate farnesyltransferase 1	ENSG00000079459	1336	2235	1898	947	1604	Cytoplasm	enzyme
FECH	ferrochelatase	ENSG00000066926	298	256	143	401	274.5	Cytoplasm	enzyme
FER	FER tyrosine kinase	ENSG00000151422	8	10	10	18	11.5	Cytoplasm	kinase
FGFR1OP2	FGFR1 oncogene partner 2	ENSG00000111790	2884	2641	2700	4539	3191	Cytoplasm	kinase
FIS1	fission, mitochondrial 1	ENSG00000214253	2333	3580	4595	4762	3817.5	Cytoplasm	other
FKBP1B	FK506 binding protein 1B	ENSG00000119782	23	69	22	75	47.25	Cytoplasm	enzyme
FKBP3	FK506 binding protein 3	ENSG00000100442	180	291	110	370	237.75	Nucleus	enzyme
FKBP8	FK506 binding protein 8	ENSG00000105701	3209	617	7033	2859	3429.5	Cytoplasm	other
FLCN	folliculin	ENSG00000154803	30	20	55	33	34.5	Cytoplasm	other
FLOT2	flotillin 2	ENSG00000132589	147	235	229	482	273.25	Plasma Membrane	other
FMR1	fragile X mental retardation 1	ENSG00000102081	7	12	8	75	25.5	Cytoplasm	translation regulator
FNBP4	formin binding protein 4	ENSG00000109920	10	56	27	27	30	Nucleus	other
FOPNL	FGFR1OP N-terminal like	ENSG00000133393	27	51	37	11	31.5	Cytoplasm	other
FOXJ2	forkhead box J2	ENSG00000065970	43	93	40	5	45.25	Nucleus	transcription regulator
FOXJ3	forkhead box J3	ENSG00000198815	76	160	85	266	146.75	Nucleus	transcription regulator
FOXN2	forkhead box N2	ENSG00000170802	17	9	19	11	14	Nucleus	other
FOXN3	forkhead box N3	ENSG00000053254	7	20	23	84	33.5	Nucleus	transcription regulator
FOXO3	forkhead box O3	ENSG00000118689	1059	1218	674	2787	1434.5	Nucleus	transcription regulator
FOXO4	forkhead box O4	ENSG00000184481	84	190	261	242	194.25	Nucleus	transcription regulator
FOXP1	forkhead box P1	ENSG00000114861	59	45	52	148	76	Nucleus	other
FRA10AC1	fragile site, folic acid type, rare, fra(10)(q23.3) or fra(10)(q24.2) candidate 1	ENSG00000148690	115	279	146	312	213	Nucleus	other
FRG1	FSHD region gene 1	ENSG00000109536	23	9	5	20	14.25	Nucleus	transporter
FRG1CP	FSHD region gene 1 family member C, pseudogene [Source:HGNC Symbol	ENSG00000282826	100	27	35	8	42.5
FRG1HP	FSHD region gene 1 family member H, pseudogene [Source:HGNC Symbol	ENSG00000276291	8	15	19	56	24.5
FRMD4A	FERM domain containing 4A	ENSG00000151474	29	73	78	61	60.25	Plasma Membrane	other
FRYL	FRY like transcription coactivator	ENSG00000075539	46	64	16	124	62.5	Other	other
FTH1	ferritin heavy chain 1	ENSG00000167996	114	35	12	26	46.75	Cytoplasm	enzyme
FTL	ferritin light chain	ENSG00000087086	339556	499311	274438	440878	388546	Cytoplasm	enzyme	annotations from IPA with Ensembl identifiers
FTLP2	ferritin light chain pseudogene 2 [Source:HGNC Symbol	ENSG00000232368	61	104	70	211	111.5
FTLP3	ferritin light chain pseudogene 3 [Source:HGNC Symbol	ENSG00000226608	409	690	401	696	549
FUNDC2	FUN14 domain containing 2	ENSG00000165775	741	733	1776	962	1053	Cytoplasm	other
FURIN	furin, paired basic amino acid cleaving enzyme	ENSG00000140564	40	25	62	41	42	Cytoplasm	peptidase
FXR1	FMR1 autosomal homolog 1	ENSG00000114416	55	174	39	115	95.75	Cytoplasm	other
G2E3	G2/M-phase specific E3 ubiquitin protein ligase	ENSG00000092140	21	76	17	96	52.5	Cytoplasm	enzyme
G3BP2	G3BP stress granule assembly factor 2	ENSG00000138757	25	59	5	23	28	Cytoplasm	enzyme
GAB1	GRB2 associated binding protein 1	ENSG00000109458	17	8	5	51	20.25	Cytoplasm	kinase
GABARAPL1	GABA type A receptor associated protein like 1	ENSG00000139112	85	22	83	76	66.5	Cytoplasm	other
GABARAPL2	GABA type A receptor associated protein like 2	ENSG00000034713	1410	763	982	1494	1162.25	Cytoplasm	other
GALNT11	polypeptide N-acetylgalactosaminyltransferase 11	ENSG00000178234	22	26	11	23	20.5	Cytoplasm	enzyme
GALNT5	polypeptide N-acetylgalactosaminyltransferase 5	ENSG00000136542	47	107	19	167	85	Cytoplasm	enzyme
GALNT6	polypeptide N-acetylgalactosaminyltransferase 6	ENSG00000139629	11	59	187	130	96.75	Cytoplasm	enzyme
GAPDH	glyceraldehyde-3-phosphate dehydrogenase	ENSG00000111640	410	866	211	535	505.5	Cytoplasm	enzyme
GAPVD1	GTPase activating protein and VPS9 domains 1	ENSG00000165219	91	65	70	186	103	Cytoplasm	other
GATA1	GATA binding protein 1	ENSG00000102145	443	714	1051	566	693.5	Nucleus	transcription regulator
GBGT1	globoside alpha-1,3-N-acetylgalactosaminyltransferase 1	ENSG00000148288	75	28	20	110	58.25	Other	enzyme
GCC2	GRIP and coiled-coil domain containing 2	ENSG00000135968	37	129	48	207	105.25	Cytoplasm	other
GCLC	glutamate-cysteine ligase catalytic subunit	ENSG00000001084	41	73	9	47	42.5	Cytoplasm	enzyme
GCNT2	glucosaminyl (N-acetyl) transferase 2, I-branching enzyme (I blood group)	ENSG00000111846	24	92	65	187	92	Cytoplasm	enzyme
GDE1	glycerophosphodiester phosphodiesterase 1	ENSG00000006007	103	69	98	205	118.75	Plasma Membrane	enzyme
GDI2	GDP dissociation inhibitor 2	ENSG00000057608	96	110	32	84	80.5	Cytoplasm	other
GFI1B	growth factor independent 1B transcriptional repressor	ENSG00000165702	12	13	73	51	37.25	Nucleus	transcription regulator
GFOD2	glucose-fructose oxidoreductase domain containing 2	ENSG00000141098	60	40	338	197	158.75	Extracellular Space	enzyme
GGNBP2	gametogenetin binding protein 2	ENSG00000278311	34	237	75	176	130.5	Other	other
GHITM	growth hormone inducible transmembrane protein	ENSG00000165678	490	230	444	249	353.25	Cytoplasm	other
GID8	GID complex subunit 8 homolog	ENSG00000101193	52	81	61	92	71.5	Nucleus	other
GIGYF2	GRB10 interacting GYF protein 2	ENSG00000204120	18	86	13	61	44.5	Cytoplasm	other
GKAP1	G kinase anchoring protein 1	ENSG00000165113	250	708	184	731	468.25	Cytoplasm	other
GLIPR2	GLI pathogenesis related 2	ENSG00000122694	10	9	12	25	14	Cytoplasm	other
GLRX3	glutaredoxin 3	ENSG00000108010	20	36	92	50	49.5	Cytoplasm	enzyme
GLRX5	glutaredoxin 5	ENSG00000182512	186	232	102	185	176.25	Cytoplasm	other
GLUL	glutamate-ammonia ligase	ENSG00000135821	9516	18069	21387	16194	16291.5	Cytoplasm	enzyme
GMFG	glia maturation factor gamma	ENSG00000130755	38	93	26	41	49.5	Cytoplasm	growth factor
GMPR	guanosine monophosphate reductase	ENSG00000137198	267	346	326	304	310.75	Cytoplasm	enzyme
GMPS	guanine monophosphate synthase	ENSG00000163655	47	203	67	241	139.5	Nucleus	enzyme
GNA12	G protein subunit alpha 12	ENSG00000146535	78	108	94	89	92.25	Plasma Membrane	enzyme
GNAS	GNAS complex locus	ENSG00000087460	3965	4297	2372	5700	4083.5	Plasma Membrane	enzyme
GNB1	G protein subunit beta 1	ENSG00000078369	5	5	21	8	9.75	Plasma Membrane	enzyme
GNL3L	G protein nucleolar 3 like	ENSG00000130119	681	492	580	706	614.75	Nucleus	other
GOLGA4	golgin A4	ENSG00000144674	120	438	155	349	265.5	Cytoplasm	other
GOLGA7	golgin A7	ENSG00000147533	12	61	82	25	45	Cytoplasm	other
GOLGB1	golgin B1	ENSG00000173230	16	68	66	7	39.25	Cytoplasm	other
GOLIM4	golgi integral membrane protein 4	ENSG00000173905	33	140	30	72	68.75	Cytoplasm	other
GOLT1B	golgi transport 1B	ENSG00000111711	36	6	9	84	33.75	Cytoplasm	other
GOSR1	golgi SNAP receptor complex member 1	ENSG00000108587	20	27	9	39	23.75	Cytoplasm	transporter
GOSR2	golgi SNAP receptor complex member 2	ENSG00000108433	10	10	17	11	12	Cytoplasm	transporter
GPALPP1	GPALPP motifs containing 1	ENSG00000133114	34	71	47	31	45.75	Other	other
GPATCH1	G-patch domain containing 1	ENSG00000076650	43	57	53	159	78	Extracellular Space	other
GPBP1	GC-rich promoter binding protein 1	ENSG00000062194	390	760	182	512	461	Nucleus	transcription regulator
GPBP1L1	GC-rich promoter binding protein 1 like 1	ENSG00000159592	99	150	40	106	98.75	Other	other
GPCPD1	glycerophosphocholine phosphodiesterase 1	ENSG00000125772	31	142	27	81	70.25	Cytoplasm	enzyme
GPKOW	G-patch domain and KOW motifs	ENSG00000068394	40	221	207	138	151.5	Nucleus	other
GPN1	GPN-loop GTPase 1	ENSG00000198522	21	5	93	90	52.25	Nucleus	transcription regulator
GPR146	G protein-coupled receptor 146	ENSG00000164849	21	9	40	37	26.75	Plasma Membrane	G-protein coupled receptor
GPX1	glutathione peroxidase 1	ENSG00000233276	1887	191	961	894	983.25	Cytoplasm	enzyme
GPX4	glutathione peroxidase 4	ENSG00000167468	55	27	336	86	126	Cytoplasm	enzyme
GRINA	glutamate ionotropic receptor NMDA type subunit associated protein 1	ENSG00000178719	87	128	141	132	122	Other	ion channel
GRK6	G protein-coupled receptor kinase 6	ENSG00000198055	9	7	75	38	32.25	Plasma Membrane	kinase
GSPT1	G1 to S phase transition 1	ENSG00000103342	1941	1976	1397	2458	1943	Cytoplasm	translation regulator
GSTK1	glutathione S-transferase kappa 1	ENSG00000197448	590	819	1076	876	840.25	Cytoplasm	enzyme
GSTO1	glutathione S-transferase omega 1	ENSG00000148834	72	42	242	163	129.75	Cytoplasm	enzyme
GTDC1	glycosyltransferase like domain containing 1	ENSG00000121964	52	181	60	231	131	Other	other
GTF3A	general transcription factor IIIA	ENSG00000122034	51	80	37	130	74.5	Nucleus	transcription regulator
GUCD1	guanylyl cyclase domain containing 1	ENSG00000138867	750	989	704	1580	1005.75	Other	other
GUK1	guanylate kinase 1	ENSG00000143774	1813	652	5086	3155	2676.5	Cytoplasm	kinase
GXYLT1	glucoside xylosyltransferase 1	ENSG00000151233	7	19	26	59	27.75	Cytoplasm	enzyme
GYPA	glycophorin A (MNS blood group)	ENSG00000170180	1414	1249	640	1937	1310	Plasma Membrane	other
GYPB	glycophorin B (MNS blood group)	ENSG00000250361	334	318	359	987	499.5	Plasma Membrane	other
GYPC	glycophorin C (Gerbich blood group)	ENSG00000136732	5888	4519	9234	7321	6740.5	Plasma Membrane	other
GYPE	glycophorin E (MNS blood group)	ENSG00000197465	88	38	67	62	63.75	Plasma Membrane	other
H3F3A/H3F3B	H3 histone, family 3A	ENSG00000163041	5	12	13	5	8.75	Nucleus	other
HADHA	hydroxyacyl-CoA dehydrogenase/3-ketoacyl-CoA thiolase/enoyl-CoA hydratase (trifunctional protein), alpha subunit	ENSG00000084754	156	214	159	543	268	Cytoplasm	enzyme
HADHB	hydroxyacyl-CoA dehydrogenase/3-ketoacyl-CoA thiolase/enoyl-CoA hydratase (trifunctional protein), beta subunit	ENSG00000138029	37	52	61	120	67.5	Cytoplasm	enzyme
HAGH	hydroxyacylglutathione hydrolase	ENSG00000063854	300	520	790	407	504.25	Cytoplasm	enzyme
HARBI1	harbinger transposase derived 1	ENSG00000180423	5	20	5	48	19.5	Cytoplasm	other
HAUS2	HAUS augmin like complex subunit 2	ENSG00000137814	40	64	8	16	32	Cytoplasm	other
HAUS6	HAUS augmin like complex subunit 6	ENSG00000147874	127	284	65	177	163.25	Cytoplasm	other
HAX1	HCLS1 associated protein X-1	ENSG00000143575	24	10	38	8	20	Cytoplasm	other
HBA1	hemoglobin subunit alpha 1 [Source:HGNC Symbol	ENSG00000206172	31335	7548	41801	22172	25714
HBA1/HBA2	hemoglobin subunit alpha 2	ENSG00000188536	625974	108056	795777	248181	444497	Extracellular Space	transporter	Htseq gene expressions
HBB	hemoglobin subunit beta	ENSG00000244734	57995610	82045842	77400366	83320646	75190616	Cytoplasm	transporter
HBBP1	hemoglobin subunit beta pseudogene 1 [Source:HGNC Symbol	ENSG00000229988	33	54	65	57	52.25
HBD	hemoglobin subunit delta	ENSG00000223609	49479	70924	78794	138024	84305.2	Other	transporter
HBE1	hemoglobin subunit epsilon 1	ENSG00000213931	15	62	37	51	41.25	Cytoplasm	transporter
HBG2	hemoglobin subunit gamma 2	ENSG00000196565	59744	21963	50876	16539	37280.5	Cytoplasm	other
HBM	hemoglobin subunit mu [Source:HGNC Symbol	ENSG00000206177	40	18	72	127	64.25
HBP1	HMG-box transcription factor 1	ENSG00000105856	7	14	10	39	17.5	Nucleus	transcription regulator
HCCS	holocytochrome c synthase	ENSG00000004961	13	13	24	7	14.25	Cytoplasm	enzyme
HCFC1R1	host cell factor C1 regulator 1	ENSG00000103145	17	11	28	29	21.25	Nucleus	other
HDAC6	histone deacetylase 6	ENSG00000094631	54	37	338	113	135.5	Nucleus	transcription regulator
HDGF	hepatoma-derived growth factor	ENSG00000143321	199	383	337	424	335.75	Extracellular Space	growth factor
HDGFRP3	hepatoma-derived growth factor, related protein 3	ENSG00000166503	19	28	6	27	20	Nucleus	other
HDLBP	high density lipoprotein binding protein	ENSG00000115677	861	948	1587	1702	1274.5	Nucleus	transporter
HECTD1	HECT domain E3 ubiquitin protein ligase 1	ENSG00000092148	11	26	70	9	29	Other	enzyme
HECTD4	HECT domain E3 ubiquitin protein ligase 4	ENSG00000173064	58	62	47	36	50.75	Nucleus	other
HELQ	helicase, POLQ-like	ENSG00000163312	17	14	19	59	27.25	Nucleus	enzyme
HELZ	helicase with zinc finger	ENSG00000198265	13	26	8	31	19.5	Nucleus	enzyme
HEMGN	hemogen	ENSG00000136929	15276	26333	13078	52561	26812	Nucleus	other
HEPACAM2	HEPACAM family member 2	ENSG00000188175	15	69	7	104	48.75	Cytoplasm	other
HERC1	HECT and RLD domain containing E3 ubiquitin protein ligase family member 1	ENSG00000103657	57	203	48	258	141.5	Cytoplasm	other
HERC2P2	hect domain and RLD 2 pseudogene 2 [Source:HGNC Symbol	ENSG00000276550	11	6	18	13	12
HEXIM1	hexamethylene bisacetamide inducible 1	ENSG00000186834	11	24	11	12	14.5	Nucleus	transcription regulator
HIF1AN	hypoxia inducible factor 1 alpha subunit inhibitor	ENSG00000166135	6	23	27	42	24.5	Nucleus	enzyme
HIPK1	homeodomain interacting protein kinase 1	ENSG00000163349	122	60	59	231	118	Nucleus	kinase
HIPK3	homeodomain interacting protein kinase 3	ENSG00000110422	8	29	46	40	30.75	Nucleus	kinase
HIST1H1C	histone cluster 1, H1c	ENSG00000187837	49	28	44	27	37	Nucleus	other
HIST1H4C	histone cluster 1, H4c	ENSG00000197061	551	829	905	1339	906	Nucleus	other
HK1	hexokinase 1	ENSG00000156515	634	151	1585	367	684.25	Cytoplasm	kinase
HLA-A	major histocompatibility complex, class I, A	ENSG00000206503	175	48	286	40	137.25	Plasma Membrane	other
HLTF	helicase like transcription factor	ENSG00000071794	8	71	64	58	50.25	Nucleus	transcription regulator
HMBS	hydroxymethylbilane synthase	ENSG00000256269	525	831	1151	1365	968	Cytoplasm	enzyme
HMGB1	high mobility group box 1	ENSG00000189403	164	253	82	184	170.75	Nucleus	transcription regulator
HMGB1P5	high mobility group box 1 pseudogene 5 [Source:HGNC Symbol	ENSG00000132967	7	14	14	5	10
HMGB2	high mobility group box 2	ENSG00000164104	64	174	102	166	126.5	Nucleus	transcription regulator
HMGN2	high mobility group nucleosomal binding domain 2	ENSG00000198830	30	37	46	24	34.25	Nucleus	other
HMGN5	high mobility group nucleosome binding domain 5	ENSG00000198157	31	99	27	212	92.25	Nucleus	transcription regulator
HMMR	hyaluronan mediated motility receptor	ENSG00000072571	53	156	57	112	94.5	Plasma Membrane	transmembrane receptor
HN1	hematological and neurological expressed 1	ENSG00000189159	54	10	49	9	30.5	Nucleus	other
HNRNPA3	heterogeneous nuclear ribonucleoprotein A3	ENSG00000170144	16	26	8	50	25	Nucleus	other
HNRNPC	heterogeneous nuclear ribonucleoprotein C (C1/C2)	ENSG00000092199	5	9	24	44	20.5	Nucleus	other
HNRNPD	heterogeneous nuclear ribonucleoprotein D	ENSG00000138668	9	55	10	38	28	Nucleus	transcription regulator
HNRNPDL	heterogeneous nuclear ribonucleoprotein D like	ENSG00000152795	22	23	43	46	33.5	Nucleus	other
HNRNPK	heterogeneous nuclear ribonucleoprotein K	ENSG00000165119	354	599	462	485	475	Nucleus	transcription regulator
HNRNPM	heterogeneous nuclear ribonucleoprotein M	ENSG00000099783	362	765	273	553	488.25	Nucleus	other
HOOK3	hook microtubule-tethering protein 3	ENSG00000168172	49	78	47	137	77.75	Cytoplasm	other
HP1BP3	heterochromatin protein 1 binding protein 3	ENSG00000127483	630	1254	591	1066	885.25	Nucleus	other
HPS1	HPS1, biogenesis of lysosomal organelles complex 3 subunit 1	ENSG00000107521	1588	354	3460	1572	1743.5	Cytoplasm	other
HSDL2	hydroxysteroid dehydrogenase like 2	ENSG00000119471	21	80	28	66	48.75	Cytoplasm	transporter
HSP90AA1	heat shock protein 90 alpha family class A member 1	ENSG00000080824	189	174	69	299	182.75	Cytoplasm	enzyme
HSP90AB1	heat shock protein 90 alpha family class B member 1	ENSG00000096384	314	237	316	96	240.75	Cytoplasm	enzyme
HSP90B1	heat shock protein 90 beta family member 1	ENSG00000166598	20	13	18	57	27	Cytoplasm	other
HSPA13	heat shock protein family A (Hsp70) member 13	ENSG00000155304	33	5	25	41	26	Cytoplasm	other
HSPB1	heat shock protein family B (small) member 1	ENSG00000106211	375	285	209	489	339.5	Cytoplasm	other
HTRA2	HtrA serine peptidase 2	ENSG00000115317	30	42	14	37	30.75	Cytoplasm	peptidase
HUWE1	HECT, UBA and WWE domain containing 1, E3 ubiquitin protein ligase	ENSG00000086758	17	50	60	41	42	Nucleus	transcription regulator
HYAL3	hyaluronoglucosaminidase 3	ENSG00000186792	24	75	68	96	65.75	Cytoplasm	enzyme
IBTK	inhibitor of Bruton tyrosine kinase	ENSG00000005700	17	47	24	38	31.5	Cytoplasm	other
ICE2	interactor of little elongation complex ELL subunit 2 [Source:HGNC Symbol	ENSG00000128915	15	26	8	15	16
IDH3G	isocitrate dehydrogenase 3 (NAD(+)) gamma	ENSG00000067829	44	33	57	102	59	Cytoplasm	enzyme
IFI27	interferon alpha inducible protein 27	ENSG00000165949	695	885	354	817	687.75	Cytoplasm	other
IFIT1	interferon induced protein with tetratricopeptide repeats 1	ENSG00000185745	12	57	26	40	33.75	Cytoplasm	other
IFIT1B	interferon induced protein with tetratricopeptide repeats 1B	ENSG00000204010	1628	1546	736	1565	1368.75	Cytoplasm	other
IFNAR1	interferon alpha and beta receptor subunit 1	ENSG00000142166	14	26	12	24	19	Plasma Membrane	transmembrane receptor
IFT122	intraflagellar transport 122	ENSG00000163913	24	60	75	51	52.5	Nucleus	other
IFT20	intraflagellar transport 20	ENSG00000109083	59	8	66	11	36	Cytoplasm	other
IFT52	intraflagellar transport 52	ENSG00000101052	171	352	240	281	261	Cytoplasm	other
IFT74	intraflagellar transport 74	ENSG00000096872	111	450	189	399	287.25	Cytoplasm	other
IFT88	intraflagellar transport 88	ENSG00000032742	111	93	23	188	103.75	Cytoplasm	other
IGBP1	immunoglobulin (CD79A) binding protein 1	ENSG00000089289	41	24	19	39	30.75	Cytoplasm	phosphatase
IGF2BP2	insulin like growth factor 2 mRNA binding protein 2	ENSG00000073792	281	401	607	939	557	Cytoplasm	translation regulator
IK	IK cytokine, down-regulator of HLA II	ENSG00000113141	162	28	133	85	102	Extracellular Space	cytokine
IL15RA	interleukin 15 receptor subunit alpha	ENSG00000134470	28	40	13	56	34.25	Plasma Membrane	transmembrane receptor
INO80	INO80 complex subunit	ENSG00000128908	15	12	11	39	19.25	Nucleus	enzyme
INO80D	INO80 complex subunit D	ENSG00000114933	7	27	14	34	20.5	Other	other
INPP5D	inositol polyphosphate-5-phosphatase D	ENSG00000168918	24	38	26	19	26.75	Cytoplasm	phosphatase
INPP5K	inositol polyphosphate-5-phosphatase K	ENSG00000132376	24	46	172	69	77.75	Cytoplasm	phosphatase
INSR	insulin receptor	ENSG00000171105	47	37	11	44	34.75	Plasma Membrane	kinase
IP6K2	inositol hexakisphosphate kinase 2	ENSG00000068745	11	5	12	38	16.5	Cytoplasm	kinase
IQGAP2	IQ motif containing GTPase activating protein 2	ENSG00000145703	64	317	83	162	156.5	Cytoplasm	other
IRF2	interferon regulatory factor 2	ENSG00000168310	97	157	44	108	101.5	Nucleus	transcription regulator
IRF3	interferon regulatory factor 3	ENSG00000126456	49	14	328	190	145.25	Nucleus	transcription regulator
ISCA1	iron-sulfur cluster assembly 1	ENSG00000135070	696	304	528	763	572.75	Cytoplasm	other
ISCU	iron-sulfur cluster assembly enzyme	ENSG00000136003	119	40	150	170	119.75	Cytoplasm	other
ISG20	interferon stimulated exonuclease gene 20	ENSG00000172183	9	49	249	116	105.75	Nucleus	enzyme
ITGA4	integrin subunit alpha 4	ENSG00000115232	21	45	8	63	34.25	Plasma Membrane	transmembrane receptor
ITGB3BP	integrin subunit beta 3 binding protein	ENSG00000142856	43	32	49	83	51.75	Nucleus	other
ITLN1	intelectin 1	ENSG00000179914	700	744	220	518	545.5	Plasma Membrane	other
ITSN1	intersectin 1	ENSG00000205726	152	348	155	638	323.25	Cytoplasm	other
ITSN2	intersectin 2	ENSG00000198399	71	170	48	181	117.5	Cytoplasm	other
JAK2	Janus kinase 2	ENSG00000096968	24	46	16	12	24.5	Cytoplasm	kinase
JAZF1	JAZF zinc finger 1	ENSG00000153814	190	180	215	476	265.25	Nucleus	transcription regulator
JHDM1D-AS1	JHDM1D antisense RNA 1 (head to head) [Source:HGNC Symbol	ENSG00000260231	22	27	12	54	28.75
JMJD1C	jumonji domain containing 1C	ENSG00000171988	44	240	28	261	143.25	Nucleus	other
JTB	jumping translocation breakpoint	ENSG00000143543	44	33	70	97	61	Plasma Membrane	other
KANK2	KN motif and ankyrin repeat domains 2	ENSG00000197256	47	28	18	63	39	Nucleus	transcription regulator
KANSL1	KAT8 regulatory NSL complex subunit 1	ENSG00000120071	96	23	6	43	42	Nucleus	other
KARS	lysyl-tRNA synthetase	ENSG00000065427	654	503	789	786	683	Cytoplasm	enzyme
KAT2B	lysine acetyltransferase 2B	ENSG00000114166	599	1943	742	1688	1243	Nucleus	transcription regulator
KAT7	lysine acetyltransferase 7	ENSG00000136504	15	15	14	22	16.5	Nucleus	enzyme
KCTD9	potassium channel tetramerization domain containing 9	ENSG00000104756	26	21	10	89	36.5	Other	other
KDELR1	KDEL endoplasmic reticulum protein retention receptor 1	ENSG00000105438	8	13	10	29	15	Cytoplasm	transporter
KDM1A	lysine demethylase 1A	ENSG00000004487	24	42	17	37	30	Nucleus	enzyme
KDM3A	lysine demethylase 3A	ENSG00000115548	17	5	13	16	12.75	Nucleus	transcription regulator
KDM5A	lysine demethylase 5A	ENSG00000073614	20	38	22	15	23.75	Nucleus	transcription regulator
KDM6A	lysine demethylase 6A	ENSG00000147050	29	57	11	43	35	Nucleus	enzyme
KDM7A	lysine demethylase 7A	ENSG00000006459	115	103	118	106	110.5	Nucleus	enzyme
KEL	Kell blood group, metallo-endopeptidase	ENSG00000197993	339	456	833	984	653	Plasma Membrane	peptidase
KHNYN	KH and NYN domain containing	ENSG00000100441	22	21	55	192	72.5	Other	other
KIAA0232	KIAA0232	ENSG00000170871	17	9	7	20	13.25	Extracellular Space	other
KIAA0430	KIAA0430	ENSG00000166783	378	569	857	1475	819.75	Cytoplasm	other
KIAA0586	KIAA0586	ENSG00000100578	140	89	76	47	88	Cytoplasm	other
KIAA0922	KIAA0922	ENSG00000121210	23	35	21	17	24	Other	other
KIAA1191	KIAA1191	ENSG00000122203	114	417	165	236	233	Cytoplasm	other
KIAA1524	KIAA1524	ENSG00000163507	26	166	14	83	72.25	Cytoplasm	other
KIAA1551	KIAA1551	ENSG00000174718	136	150	166	353	201.25	Other	other
KIAA1586	KIAA1586	ENSG00000168116	593	1272	513	1435	953.25	Other	other
KIAA2026	KIAA2026	ENSG00000183354	295	764	290	845	548.5	Other	other
KIDINS220	kinase D-interacting substrate 220kDa	ENSG00000134313	33	57	85	155	82.5	Nucleus	transcription regulator
KIF11	kinesin family member 11	ENSG00000138160	17	35	5	7	16	Nucleus	other
KIF14	kinesin family member 14	ENSG00000118193	377	1076	358	1092	725.75	Cytoplasm	enzyme
KIF15	kinesin family member 15	ENSG00000163808	173	402	66	253	223.5	Nucleus	other
KIF18A	kinesin family member 18A	ENSG00000121621	31	49	39	24	35.75	Cytoplasm	enzyme
KIF20B	kinesin family member 20B	ENSG00000138182	1845	4159	1317	2412	2433.25	Nucleus	enzyme
KIF22	kinesin family member 22	ENSG00000079616	9	19	18	20	16.5	Nucleus	other
KIF2A	kinesin family member 2A	ENSG00000068796	18	51	21	62	38	Cytoplasm	other
KIF4A	kinesin family member 4A	ENSG00000090889	82	50	22	54	52	Nucleus	other
KIF5B	kinesin family member 5B	ENSG00000170759	442	858	381	1025	676.5	Cytoplasm	other
KIN	Kin17 DNA and RNA binding protein	ENSG00000151657	7	19	36	50	28	Nucleus	other
KLF1	Kruppel like factor 1	ENSG00000105610	17	15	37	50	29.75	Nucleus	transcription regulator
KLF17	Kruppel like factor 17	ENSG00000230615	99	45	59	52	63.75	Nucleus	transcription regulator
KLF3	Kruppel like factor 3	ENSG00000109787	29	12	65	100	51.5	Nucleus	transcription regulator
KLHL18	kelch like family member 18	ENSG00000114648	17	34	25	135	52.75	Other	other
KMT2A	lysine methyltransferase 2A	ENSG00000118058	48	65	39	112	66	Nucleus	transcription regulator
KMT2C	lysine methyltransferase 2C	ENSG00000055609	121	170	24	94	102.25	Nucleus	transcription regulator
KMT2E	lysine methyltransferase 2E	ENSG00000005483	1439	2860	1334	2499	2033	Nucleus	enzyme
KMT5A	lysine methyltransferase 5A	ENSG00000183955	51	28	15	70	41	Nucleus	enzyme
KNL1	kinetochore scaffold 1	ENSG00000137812	115	135	49	127	106.5	Nucleus	other
KNTC1	kinetochore associated 1	ENSG00000184445	5	13	7	10	8.75	Nucleus	other
KPNA3	karyopherin subunit alpha 3	ENSG00000102753	17	12	12	22	15.75	Nucleus	transporter
KPNA4	karyopherin subunit alpha 4	ENSG00000186432	15	18	31	12	19	Nucleus	transporter
KPNA5	karyopherin subunit alpha 5	ENSG00000196911	176	373	126	394	267.25	Cytoplasm	other
KPNA6	karyopherin subunit alpha 6	ENSG00000025800	167	248	238	334	246.75	Nucleus	transporter
KRIT1	KRIT1, ankyrin repeat containing	ENSG00000001631	10	87	42	70	52.25	Plasma Membrane	other
KRT1	keratin 1	ENSG00000167768	23	120	65	88	74	Cytoplasm	other
KTN1	kinectin 1	ENSG00000126777	273	643	299	697	478	Plasma Membrane	transmembrane receptor
KXD1	KxDL motif containing 1	ENSG00000105700	27	42	140	50	64.75	Other	other
LAMTOR1	late endosomal/lysosomal adaptor, MAPK and MTOR activator 1	ENSG00000149357	13	6	11	14	11	Plasma Membrane	other
LAMTOR2	late endosomal/lysosomal adaptor, MAPK and MTOR activator 2	ENSG00000116586	22	27	69	36	38.5	Cytoplasm	other
LAMTOR5	late endosomal/lysosomal adaptor, MAPK and MTOR activator 5	ENSG00000134248	33	17	64	42	39	Cytoplasm	other
LAPTM5	lysosomal protein transmembrane 5	ENSG00000162511	6	30	17	74	31.75	Plasma Membrane	other
LARP1	La ribonucleoprotein domain family member 1	ENSG00000155506	66	156	125	154	125.25	Cytoplasm	translation regulator
LARP1B	La ribonucleoprotein domain family member 1B	ENSG00000138709	1083	2122	1212	2917	1833.5	Extracellular Space	other
LARP4	La ribonucleoprotein domain family member 4	ENSG00000161813	49	113	48	302	128	Other	other
LARP7	La ribonucleoprotein domain family member 7	ENSG00000174720	66	105	65	59	73.75	Nucleus	other
LBH	limb bud and heart development	ENSG00000213626	127	242	635	99	275.75	Nucleus	transcription regulator
LCOR	ligand dependent nuclear receptor corepressor	ENSG00000196233	9	24	46	21	25	Nucleus	transcription regulator
LEO1	LEO1 homolog, Paf1/RNA polymerase II complex component	ENSG00000166477	17	25	19	13	18.5	Nucleus	other
LEPR	leptin receptor	ENSG00000116678	176	250	23	107	139	Plasma Membrane	transmembrane receptor
LEPROT	leptin receptor overlapping transcript	ENSG00000213625	37	76	45	141	74.75	Plasma Membrane	other
LGALS3	lectin, galactoside binding soluble 3	ENSG00000131981	10698	8095	17602	10140	11633.8	Extracellular Space	other
LGALS9	galectin 9	ENSG00000168961	8	29	36	59	33	Plasma Membrane	other
LIN54	lin-54 DREAM MuvB core complex component	ENSG00000189308	17	44	10	33	26	Nucleus	other
LIN9	lin-9 DREAM MuvB core complex component	ENSG00000183814	29	33	18	31	27.75	Nucleus	other
LINC00152	long intergenic non-protein coding RNA 152	ENSG00000222041	29	30	34	138	57.75	Other	other
LINC00570	long intergenic non-protein coding RNA 570 [Source:HGNC Symbol	ENSG00000224177	454	757	931	1674	954
LINC00853	long intergenic non-protein coding RNA 853	ENSG00000224805	16	13	31	76	34	Other	other
LINC00969	long intergenic non-protein coding RNA 969 [Source:HGNC Symbol	ENSG00000242086	11	31	36	18	24
LINC01036	long intergenic non-protein coding RNA 1036 [Source:HGNC Symbol	ENSG00000236030	52	68	22	13	38.75
LINC01094	long intergenic non-protein coding RNA 1094 [Source:HGNC Symbol	ENSG00000251442	110	359	75	254	199.5
LINC01128	long intergenic non-protein coding RNA 1128 [Source:HGNC Symbol	ENSG00000228794	347	629	305	723	501
LINC01881	long intergenic non-protein coding RNA 1881 [Source:HGNC Symbol	ENSG00000220804	7	9	12	50	19.5
LINS1	lines homolog 1	ENSG00000140471	327	1259	290	97	493.25	Other	other
LIPA	lipase A, lysosomal acid type	ENSG00000107798	62	88	90	92	83	Cytoplasm	enzyme
LNPK	lunapark, ER junction formation factor	ENSG00000144320	206	486	275	335	325.5	Cytoplasm	other
LPIN2	lipin 2	ENSG00000101577	70	372	139	367	237	Nucleus	phosphatase
LRP10	LDL receptor related protein 10	ENSG00000197324	141	81	95	188	126.25	Plasma Membrane	transmembrane receptor
LRRC2	leucine rich repeat containing 2	ENSG00000163827	20	34	14	31	24.75	Other	other
LRRC28	leucine rich repeat containing 28	ENSG00000168904	46	10	145	148	87.25	Other	other
LRRC6	leucine rich repeat containing 6	ENSG00000129295	6	9	12	10	9.25	Cytoplasm	other
LRRC75A-AS1	LRRC75A antisense RNA 1 [Source:HGNC Symbol	ENSG00000175061	225	321	243	701	372.5
LRRCC1	leucine rich repeat and coiled-coil centrosomal protein 1	ENSG00000133739	218	452	176	643	372.25	Nucleus	transporter
LRRFIP2	LRR binding FLII interacting protein 2	ENSG00000093167	41	156	42	80	79.75	Extracellular Space	other
LSM1	LSM1 homolog, mRNA degradation associated	ENSG00000175324	86	145	44	129	101	Nucleus	other
LSM10	LSM10, U7 small nuclear RNA associated	ENSG00000181817	12	10	86	53	40.25	Nucleus	other
LSM14A	LSM14A, mRNA processing body assembly factor	ENSG00000257103	47	44	34	106	57.75	Cytoplasm	other
LTBP1	latent transforming growth factor beta binding protein 1	ENSG00000049323	64	98	33	40	58.75	Extracellular Space	other
LTBP2	latent transforming growth factor beta binding protein 2	ENSG00000119681	105	150	408	619	320.5	Extracellular Space	other
LUC7L3	LUC7 like 3 pre-mRNA splicing factor	ENSG00000108848	180	209	62	305	189	Nucleus	other
LY9	lymphocyte antigen 9	ENSG00000122224	126	110	231	218	171.25	Plasma Membrane	other
LYL1	LYL1, basic helix-loop-helix family member	ENSG00000104903	80	7	42	51	45	Nucleus	transcription regulator
LYRM2	LYR motif containing 2	ENSG00000083099	43	8	10	30	22.75	Cytoplasm	other
LYSMD3	LysM domain containing 3	ENSG00000176018	22	79	9	32	35.5	Other	other
LZIC	leucine zipper and CTNNBIP1 domain containing	ENSG00000162441	30	8	20	31	22.25	Other	other
MAF1	MAF1 homolog, negative regulator of RNA polymerase III	ENSG00000179632	97	146	176	239	164.5	Nucleus	other
MALAT1	metastasis associated lung adenocarcinoma transcript 1 (non-protein coding)	ENSG00000251562	3303	6831	2362	6637	4783.25	Nucleus	other
MAN1A1	mannosidase alpha class 1A member 1	ENSG00000111885	24	49	36	56	41.25	Cytoplasm	enzyme
MAN1A2	mannosidase alpha class 1A member 2	ENSG00000198162	4370	7921	4720	12463	7368.5	Cytoplasm	enzyme
MAN2A1	mannosidase alpha class 2A member 1	ENSG00000112893	16	56	11	117	50	Cytoplasm	enzyme
MAN2A2	mannosidase alpha class 2A member 2	ENSG00000196547	34	50	24	14	30.5	Cytoplasm	enzyme
MAP1LC3B	microtubule associated protein 1 light chain 3 beta	ENSG00000140941	24	41	7	57	32.25	Cytoplasm	other
MAP2K3	mitogen-activated protein kinase kinase 3	ENSG00000034152	350	163	655	596	441	Cytoplasm	kinase
MAP3K13	mitogen-activated protein kinase kinase kinase 13	ENSG00000073803	41	10	14	99	41	Cytoplasm	kinase
MAP4K4	mitogen-activated protein kinase kinase kinase kinase 4	ENSG00000071054	242	696	248	526	428	Cytoplasm	kinase
MAP4K5	mitogen-activated protein kinase kinase kinase kinase 5	ENSG00000012983	113	231	174	288	201.5	Cytoplasm	kinase
MAPK1	mitogen-activated protein kinase 1	ENSG00000100030	24	8	43	80	38.75	Cytoplasm	kinase
MARCH2	membrane associated ring-CH-type finger 2	ENSG00000099785	135	58	547	383	280.75	Cytoplasm	enzyme
MARCH3	membrane associated ring-CH-type finger 3 [Source:HGNC Symbol	ENSG00000173926	31	38	68	55	48
MARCH6	membrane associated ring-CH-type finger 6	ENSG00000145495	498	733	1157	964	838	Cytoplasm	enzyme
MARCH7	membrane associated ring-CH-type finger 7	ENSG00000136536	23	179	37	91	82.5	Extracellular Space	other
MARCH8	membrane associated ring-CH-type finger 8	ENSG00000165406	1660	2726	3323	4469	3044.5	Cytoplasm	enzyme
MARK3	microtubule affinity regulating kinase 3	ENSG00000075413	430	1303	1068	1400	1050.25	Cytoplasm	kinase
MAT2B	methionine adenosyltransferase 2B	ENSG00000038274	77	71	45	79	68	Cytoplasm	enzyme
MAVS	mitochondrial antiviral signaling protein	ENSG00000088888	28	51	90	10	44.75	Cytoplasm	other
MAX	MYC associated factor X	ENSG00000125952	294	316	360	501	367.75	Nucleus	transcription regulator
MBD5	methyl-CpG binding domain protein 5	ENSG00000204406	293	464	175	467	349.75	Nucleus	other
MBNL1	muscleblind like splicing regulator 1	ENSG00000152601	303	238	132	299	243	Nucleus	other
MBNL3	muscleblind like splicing regulator 3	ENSG00000076770	7584	7688	6713	15574	9389.75	Nucleus	other
MBOAT2	membrane bound O-acyltransferase domain containing 2	ENSG00000143797	30	26	21	48	31.25	Cytoplasm	enzyme
MBP	myelin basic protein	ENSG00000197971	76	92	44	35	61.75	Extracellular Space	other
MCRS1	microspherule protein 1	ENSG00000187778	15	7	45	24	22.75	Nucleus	other
MCUR1	mitochondrial calcium uniporter regulator 1	ENSG00000050393	40	41	8	16	26.25	Cytoplasm	other
MEA1	male-enhanced antigen 1	ENSG00000124733	51	79	105	159	98.5	Cytoplasm	other
MECP2	methyl-CpG binding protein 2	ENSG00000169057	25	55	85	30	48.75	Nucleus	transcription regulator
MED13	mediator complex subunit 13	ENSG00000108510	118	175	140	174	151.75	Nucleus	transcription regulator
MED21	mediator complex subunit 21	ENSG00000152944	50	14	19	14	24.25	Nucleus	transcription regulator
MED28	mediator complex subunit 28	ENSG00000118579	36	68	14	94	53	Nucleus	other
MED4	mediator complex subunit 4	ENSG00000136146	19	24	37	13	23.25	Nucleus	transcription regulator
MEGF9	multiple EGF like domains 9	ENSG00000106780	12	20	75	15	30.5	Extracellular Space	other
METAP2	methionyl aminopeptidase 2	ENSG00000111142	28	81	58	90	64.25	Cytoplasm	peptidase
METTL22	methyltransferase like 22	ENSG00000067365	81	85	102	181	112.25	Other	enzyme
METTL7A	methyltransferase like 7A	ENSG00000185432	215	268	133	234	212.5	Cytoplasm	other
METTL9	methyltransferase like 9	ENSG00000197006	100	97	128	37	90.5	Other	other
MFAP1	microfibrillar associated protein 1	ENSG00000140259	14	79	26	17	34	Extracellular Space	other
MFF	mitochondrial fission factor	ENSG00000168958	10	33	15	5	15.75	Cytoplasm	other
MFN2	mitofusin 2	ENSG00000116688	25	23	98	133	69.75	Cytoplasm	enzyme
MFSD2B	major facilitator superfamily domain containing 2B	ENSG00000205639	44	60	37	117	64.5	Other	other
MGEA5	meningioma expressed antigen 5 (hyaluronidase)	ENSG00000198408	309	664	190	598	440.25	Cytoplasm	enzyme
MICAL2	microtubule associated monooxygenase, calponin and LIM domain containing 2	ENSG00000133816	372	649	699	775	623.75	Cytoplasm	enzyme
MICALCL	MICAL C-terminal like	ENSG00000133808	23	29	20	152	56	Cytoplasm	other
MIEN1	migration and invasion enhancer 1	ENSG00000141741	45	43	140	20	62	Cytoplasm	other
MIER1	MIER1 transcriptional regulator	ENSG00000198160	127	206	134	379	211.5	Nucleus	other
MINPP1	multiple inositol-polyphosphate phosphatase 1	ENSG00000107789	40	40	21	54	38.75	Cytoplasm	phosphatase
MIR22HG	MIR22 host gene	ENSG00000186594	23	16	11	21	17.75	Other	other
MIR4435-2HG	MIR4435-2 host gene [Source:HGNC Symbol	ENSG00000172965	169	140	54	149	128
MIS18BP1	MIS18 binding protein 1	ENSG00000129534	297	520	261	478	389	Nucleus	other
MKI67	marker of proliferation Ki-67	ENSG00000148773	97	378	171	234	220	Nucleus	other
MKLN1	muskelin 1	ENSG00000128585	155	234	80	101	142.5	Cytoplasm	other
MKLN1-AS	MKLN1 antisense RNA [Source:HGNC Symbol	ENSG00000236753	45	173	42	192	113
MKNK1	MAP kinase interacting serine/threonine kinase 1	ENSG00000079277	14	28	45	81	42	Cytoplasm	kinase
MKRN1	makorin ring finger protein 1	ENSG00000133606	2520	2550	3046	3779	2973.75	Other	enzyme
MLLT10	myeloid/lymphoid or mixed-lineage leukemia; translocated to, 10	ENSG00000078403	43	105	71	191	102.5	Nucleus	transcription regulator
MLLT3	MLLT3, super elongation complex subunit	ENSG00000171843	21	10	21	10	15.5	Nucleus	other
MLST8	MTOR associated protein, LST8 homolog	ENSG00000167965	9	11	28	20	17	Cytoplasm	other
MLXIP	MLX interacting protein	ENSG00000175727	9	17	19	22	16.75	Nucleus	other
MNS1	meiosis specific nuclear structural 1	ENSG00000138587	12	56	6	18	23	Cytoplasm	other
MOB1B	MOB kinase activator 1B	ENSG00000173542	57	43	21	88	52.25	Cytoplasm	other
MORC3	MORC family CW-type zinc finger 3	ENSG00000159256	849	1370	406	882	876.75	Nucleus	other
MORF4L1	mortality factor 4 like 1	ENSG00000185787	158	305	220	511	298.5	Nucleus	other
MORF4L1P1	mortality factor 4 like 1 pseudogene 1 [Source:HGNC Symbol	ENSG00000218283	7	14	6	8	8.75
MOSPD1	motile sperm domain containing 1	ENSG00000101928	483	479	314	450	431.5	Other	other
MPC2	mitochondrial pyruvate carrier 2	ENSG00000143158	59	19	75	64	54.25	Plasma Membrane	other
MPHOSPH8	M-phase phosphoprotein 8	ENSG00000196199	51	45	21	29	36.5	Nucleus	transcription regulator
MPHOSPH9	M-phase phosphoprotein 9	ENSG00000051825	142	207	145	201	173.75	Cytoplasm	other
MPP1	membrane palmitoylated protein 1	ENSG00000130830	11387	7092	16705	7474	10664.5	Plasma Membrane	kinase
MPP6	membrane palmitoylated protein 6	ENSG00000105926	564	1311	734	1843	1113	Plasma Membrane	kinase
MRC2	mannose receptor C type 2	ENSG00000011028	29	12	43	19	25.75	Plasma Membrane	transmembrane receptor
MRE11A	MRE11 homolog A, double strand break repair nuclease	ENSG00000020922	6	6	5	74	22.75	Nucleus	enzyme
MRFAP1	Morf4 family associated protein 1	ENSG00000179010	72	59	130	53	78.5	Nucleus	other
MRPL1	mitochondrial ribosomal protein L1	ENSG00000169288	5	34	24	40	25.75	Cytoplasm	other
MRPL2	mitochondrial ribosomal protein L2	ENSG00000112651	26	10	37	48	30.25	Extracellular Space	other
MRPL22	mitochondrial ribosomal protein L22	ENSG00000082515	8	35	40	41	31	Cytoplasm	other
MRPL36	mitochondrial ribosomal protein L36	ENSG00000171421	7	14	25	32	19.5	Cytoplasm	other
MRPL42	mitochondrial ribosomal protein L42	ENSG00000198015	83	276	22	174	138.75	Cytoplasm	other
MRPS16	mitochondrial ribosomal protein S16	ENSG00000182180	110	130	114	116	117.5	Cytoplasm	other
MRPS36	mitochondrial ribosomal protein S36 [Source:HGNC Symbol	ENSG00000134056	29	45	26	17	29.25
MRPS7	mitochondrial ribosomal protein S7	ENSG00000125445	56	49	60	58	55.75	Cytoplasm	other
MSI2	musashi RNA binding protein 2	ENSG00000153944	52	13	29	33	31.75	Cytoplasm	other
MSMO1	methylsterol monooxygenase 1	ENSG00000052802	21	10	19	7	14.25	Cytoplasm	enzyme
MT1L	metallothionein 1L (gene/pseudogene)	ENSG00000260549	28	58	21	24	32.75	Cytoplasm	other
MT2A	metallothionein 2A	ENSG00000125148	269	217	585	182	313.25	Cytoplasm	other
MTCH1	mitochondrial carrier 1	ENSG00000137409	13	31	24	142	52.5	Cytoplasm	other
MT-CO1	cytochrome c oxidase subunit I	ENSG00000198804	104	363	433	3621	1130.25	Cytoplasm	enzyme
MT-CO3	cytochrome c oxidase III	ENSG00000198938	12	92	19	432	138.75	Cytoplasm	enzyme
MT-CYB	cytochrome b	ENSG00000198727	17	45	61	446	142.25	Cytoplasm	enzyme
MTDH	metadherin	ENSG00000147649	325	716	365	989	598.75	Cytoplasm	transcription regulator
MTPAP	mitochondrial poly(A) polymerase	ENSG00000107951	23	70	17	37	36.75	Cytoplasm	enzyme
MTPN	myotrophin	ENSG00000105887	301	168	384	350	300.75	Nucleus	transcription regulator
MTR	5-methyltetrahydrofolate-homocysteine methyltransferase	ENSG00000116984	14	5	30	25	18.5	Cytoplasm	enzyme
MT-RNR1	s-rRNA	ENSG00000211459	575	1693	1367	13967	4400.5	Cytoplasm	other
MT-RNR2	l-rRNA	ENSG00000210082	48630	170229	46049	410138	168762	Other	other
MTRNR2L12	MT-RNR2-like 12 [Source:HGNC Symbol	ENSG00000269028	28	49	11	260	87
MTURN	maturin, neural progenitor differentiation regulator homolog (Xenopus)	ENSG00000180354	21	79	17	32	37.25	Other	other
MXI1	MAX interactor 1, dimerization protein	ENSG00000119950	1338	1437	877	3312	1741	Nucleus	transcription regulator
MYH10	myosin, heavy chain 10, non-muscle	ENSG00000133026	10	8	7	9	8.5	Cytoplasm	other
MYL12A	myosin light chain 12A	ENSG00000101608	112	99	43	35	72.25	Cytoplasm	other
MYL12B	myosin light chain 12B	ENSG00000118680	79	92	140	140	112.75	Cytoplasm	other
MYL4	myosin light chain 4	ENSG00000198336	2938	4640	4213	7183	4743.5	Cytoplasm	other
MYL6	myosin light chain 6	ENSG00000092841	6709	10241	11324	7384	8914.5	Cytoplasm	other
N4BP2L2	NEDD4 binding protein 2 like 2	ENSG00000244754	187	547	207	534	368.75	Nucleus	transcription regulator
NAA15	N(alpha)-acetyltransferase 15, NatA auxiliary subunit	ENSG00000164134	27	92	40	76	58.75	Nucleus	transcription regulator
NAA16	N(alpha)-acetyltransferase 16, NatA auxiliary subunit	ENSG00000172766	91	181	81	185	134.5	Nucleus	enzyme
NAA38	N(alpha)-acetyltransferase 38, NatC auxiliary subunit	ENSG00000183011	18	5	29	18	17.5	Nucleus	other
NAA60	N(alpha)-acetyltransferase 60, NatF catalytic subunit	ENSG00000122390	8	9	11	16	11	Cytoplasm	enzyme
NACA	nascent polypeptide-associated complex alpha subunit	ENSG00000196531	1357	1520	2225	1964	1766.5	Cytoplasm	transcription regulator
NAE1	NEDD8 activating enzyme E1 subunit 1	ENSG00000159593	33	6	26	9	18.5	Cytoplasm	enzyme
NANS	N-acetylneuraminate synthase	ENSG00000095380	32	14	111	18	43.75	Cytoplasm	enzyme
NAP1L4	nucleosome assembly protein 1 like 4	ENSG00000205531	373	493	321	539	431.5	Cytoplasm	other
NAPA	NSF attachment protein alpha	ENSG00000105402	752	1175	1908	2085	1480	Cytoplasm	transporter
NAPG	NSF attachment protein gamma	ENSG00000134265	37	127	60	43	66.75	Cytoplasm	transporter
NARF	nuclear prelamin A recognition factor	ENSG00000141562	117	162	154	240	168.25	Nucleus	enzyme
NARS	asparaginyl-tRNA synthetase	ENSG00000134440	214	303	102	240	214.75	Cytoplasm	enzyme
NASP	nuclear autoantigenic sperm protein	ENSG00000132780	32	10	8	5	13.75	Nucleus	other
NATD1	N-acetyltransferase domain containing 1 [Source:HGNC Symbol	ENSG00000274180	97	86	301	161	161.25
NBEAL1	neurobeachin like 1	ENSG00000144426	68	78	10	31	46.75	Other	other
NCAPH	non-SMC condensin I complex subunit H	ENSG00000121152	90	111	55	112	92	Nucleus	other
NCL	nucleolin	ENSG00000115053	44	70	55	85	63.5	Nucleus	other
NCOA2	nuclear receptor coactivator 2	ENSG00000140396	23	68	46	53	47.5	Nucleus	transcription regulator
NCOA4	nuclear receptor coactivator 4	ENSG00000266412	5208	4924	4062	6773	5241.75	Nucleus	transcription regulator
NCOA7	nuclear receptor coactivator 7	ENSG00000111912	209	159	84	291	185.75	Nucleus	transcription regulator
NCOR1	nuclear receptor corepressor 1	ENSG00000141027	98	125	115	191	132.25	Nucleus	transcription regulator
NDC80	NDC80, kinetochore complex component	ENSG00000080986	25	18	9	25	19.25	Nucleus	other
NDE1	nudE neurodevelopment protein 1	ENSG00000072864	89	54	70	103	79	Nucleus	other
NDEL1	nudE neurodevelopment protein 1 like 1	ENSG00000166579	8	11	34	28	20.25	Nucleus	other
NDUFA1	NADH:ubiquinone oxidoreductase subunit A1	ENSG00000125356	32	16	22	61	32.75	Cytoplasm	enzyme
NDUFA2	NADH:ubiquinone oxidoreductase subunit A2	ENSG00000131495	162	117	206	174	164.75	Cytoplasm	enzyme
NDUFA3	NADH:ubiquinone oxidoreductase subunit A3	ENSG00000170906	306	339	458	616	429.75	Cytoplasm	enzyme
NDUFA4	NDUFA4, mitochondrial complex associated	ENSG00000189043	160	63	193	272	172	Cytoplasm	enzyme
NDUFA5	NADH:ubiquinone oxidoreductase subunit A5	ENSG00000128609	38	39	16	83	44	Cytoplasm	enzyme
NDUFA6	NADH:ubiquinone oxidoreductase subunit A6	ENSG00000184983	70	87	171	59	96.75	Cytoplasm	enzyme
NDUFB1	NADH:ubiquinone oxidoreductase subunit B1	ENSG00000183648	32	50	55	44	45.25	Cytoplasm	enzyme
NDUFB2	NADH:ubiquinone oxidoreductase subunit B2	ENSG00000090266	14	15	31	22	20.5	Cytoplasm	enzyme
NDUFB4	NADH:ubiquinone oxidoreductase subunit B4	ENSG00000065518	40	64	42	55	50.25	Cytoplasm	transporter
NDUFS2	NADH:ubiquinone oxidoreductase core subunit S2	ENSG00000158864	18	6	11	36	17.75	Cytoplasm	enzyme
NDUFS4	NADH:ubiquinone oxidoreductase subunit S4	ENSG00000164258	6	8	29	31	18.5	Cytoplasm	enzyme
NDUFV3	NADH:ubiquinone oxidoreductase subunit V3	ENSG00000160194	194	140	250	148	183	Cytoplasm	enzyme
NEAT1	nuclear paraspeckle assembly transcript 1 (non-protein coding)	ENSG00000245532	124	16	51	108	74.75	Other	other
NECAB1	N-terminal EF-hand calcium binding protein 1	ENSG00000123119	6	5	7	44	15.5	Cytoplasm	other
NECAP2	NECAP endocytosis associated 2	ENSG00000157191	54	78	38	123	73.25	Cytoplasm	other
NEDD4L	neural precursor cell expressed, developmentally down-regulated 4-like, E3 ubiquitin protein ligase	ENSG00000049759	107	140	109	228	146	Cytoplasm	enzyme
NEDD8	neural precursor cell expressed, developmentally down-regulated 8	ENSG00000129559	20	14	22	43	24.75	Nucleus	enzyme
NEIL2	nei like DNA glycosylase 2	ENSG00000154328	10	75	116	96	74.25	Nucleus	enzyme
NEIL3	nei like DNA glycosylase 3	ENSG00000109674	331	1287	574	790	745.5	Nucleus	enzyme
NEK1	NIMA related kinase 1	ENSG00000137601	409	728	322	838	574.25	Nucleus	kinase
NELFE	negative elongation factor complex member E	ENSG00000204356	73	73	160	110	104	Nucleus	other
NEMF	nuclear export mediator factor	ENSG00000165525	1113	3025	1422	4143	2425.75	Nucleus	other
NFAT5	nuclear factor of activated T-cells 5, tonicity-responsive	ENSG00000102908	15	28	6	45	23.5	Nucleus	transcription regulator
NFE2	nuclear factor, erythroid 2	ENSG00000123405	6836	9896	16847	17805	12846	Nucleus	transcription regulator
NFE2L2	nuclear factor, erythroid 2 like 2	ENSG00000116044	39	117	13	88	64.25	Nucleus	transcription regulator
NFIA	nuclear factor I A	ENSG00000162599	287	372	305	1051	503.75	Nucleus	transcription regulator
NFIX	nuclear factor I X	ENSG00000008441	2410	2082	2758	3036	2571.5	Nucleus	transcription regulator
NINJ2	ninjurin 2	ENSG00000171840	2024	6089	8940	6445	5874.5	Plasma Membrane	other
NIPBL	NIPBL, cohesin loading factor	ENSG00000164190	670	1750	609	1664	1173.25	Nucleus	transcription regulator
NKIRAS2	NFKB inhibitor interacting Ras like 2	ENSG00000168256	110	113	215	156	148.5	Cytoplasm	enzyme
NME4	NME/NM23 nucleoside diphosphate kinase 4	ENSG00000103202	173	315	276	544	327	Cytoplasm	kinase
NMT1	N-myristoyltransferase 1	ENSG00000136448	37	57	53	89	59	Cytoplasm	enzyme
NOL10	nucleolar protein 10	ENSG00000115761	36	54	9	31	32.5	Nucleus	other
NOP58	NOP58 ribonucleoprotein	ENSG00000055044	50	95	29	135	77.25	Nucleus	enzyme
NPAT	nuclear protein, coactivator of histone transcription	ENSG00000149308	111	342	113	202	192	Nucleus	transcription regulator
NPIPB2	nuclear pore complex interacting protein family, member B2 [Source:HGNC Symbol	ENSG00000234719	175	109	38	98	105
NPIPB4	nuclear pore complex interacting protein family member B4 [Source:HGNC Symbol	ENSG00000185864	15	17	15	17	16
NPIPB5	nuclear pore complex interacting protein family member B5 [Source:HGNC Symbol	ENSG00000243716	5	14	23	8	12.5
NPL	N-acetylneuraminate pyruvate lyase	ENSG00000135838	362	621	332	564	469.75	Cytoplasm	enzyme
NPM1	nucleophosmin	ENSG00000181163	32	66	15	21	33.5	Nucleus	transcription regulator
NPRL3	NPR3 like, GATOR1 complex subunit	ENSG00000103148	4309	193	10867	1246	4153.75	Other	other
NR1H3	nuclear receptor subfamily 1 group H member 3	ENSG00000025434	7	8	26	18	14.75	Nucleus	ligand-dependent nuclear receptor
NRBP1	nuclear receptor binding protein 1	ENSG00000115216	194	34	284	244	189	Nucleus	kinase
NRDC	nardilysin convertase	ENSG00000078618	788	698	1383	1124	998.25	Cytoplasm	peptidase
NRDE2	NRDE-2, necessary for RNA interference, domain containing	ENSG00000119720	6	34	22	13	18.75	Other	other
NRIR	negative regulator of interferon response (non-protein coding) [Source:HGNC Symbol	ENSG00000225964	50	47	20	17	33.5
NSA2	NSA2, ribosome biogenesis homolog	ENSG00000164346	10	15	14	54	23.25	Nucleus	other
NSMCE2	NSE2/MMS21 homolog, SMC5-SMC6 complex SUMO ligase	ENSG00000156831	12	65	28	74	44.75	Nucleus	enzyme
NSRP1	nuclear speckle splicing regulatory protein 1	ENSG00000126653	82	69	54	201	101.5	Nucleus	other
NSUN3	NOP2/Sun RNA methyltransferase family member 3	ENSG00000178694	1064	1907	701	1997	1417.25	Other	other
NSUN6	NOP2/Sun RNA methyltransferase family member 6	ENSG00000241058	14	9	8	21	13	Cytoplasm	enzyme
NT5C3A	5'-nucleotidase, cytosolic IIIA	ENSG00000122643	189	217	157	376	234.75	Cytoplasm	phosphatase
NTAN1	N-terminal asparagine amidase	ENSG00000157045	30	31	25	71	39.25	Nucleus	enzyme
NUB1	negative regulator of ubiquitin like proteins 1	ENSG00000013374	66	95	47	62	67.5	Nucleus	other
NUCB1	nucleobindin 1	ENSG00000104805	131	71	494	194	222.5	Cytoplasm	other
NUCB2	nucleobindin 2	ENSG00000070081	181	449	139	542	327.75	Nucleus	other
NUCKS1	nuclear casein kinase and cyclin dependent kinase substrate 1	ENSG00000069275	64	120	32	108	81	Nucleus	kinase
NUDT1	nudix hydrolase 1	ENSG00000106268	228	94	508	439	317.25	Extracellular Space	phosphatase
NUDT2	nudix hydrolase 2	ENSG00000164978	21	40	6	51	29.5	Plasma Membrane	phosphatase
NUDT4	nudix hydrolase 4	ENSG00000173598	67	55	45	20	46.75	Cytoplasm	phosphatase
NUP107	nucleoporin 107	ENSG00000111581	55	119	42	141	89.25	Nucleus	transporter
NUP153	nucleoporin 153	ENSG00000124789	58	49	19	104	57.5	Nucleus	transporter
NUP50	nucleoporin 50	ENSG00000093000	23	53	108	38	55.5	Nucleus	transporter
NUP88	nucleoporin 88	ENSG00000108559	60	21	78	464	155.75	Nucleus	transporter
NUP98	nucleoporin 98	ENSG00000110713	94	84	75	14	66.75	Nucleus	transporter
NUSAP1	nucleolar and spindle associated protein 1	ENSG00000137804	781	1339	304	998	855.5	Nucleus	other
NUTM2A-AS1	NUTM2A antisense RNA 1 [Source:HGNC Symbol	ENSG00000223482	205	88	74	247	153.5
NVL	nuclear VCP-like	ENSG00000143748	104	177	83	188	138	Nucleus	other
OAZ1	ornithine decarboxylase antizyme 1	ENSG00000104904	40325	25820	84632	50664	50360.2	Cytoplasm	enzyme
OAZ2	ornithine decarboxylase antizyme 2	ENSG00000180304	246	375	521	670	453	Cytoplasm	other
OCIAD1	OCIA domain containing 1	ENSG00000109180	153	125	83	58	104.75	Cytoplasm	other
ODC1	ornithine decarboxylase 1	ENSG00000115758	145	360	197	369	267.75	Cytoplasm	enzyme
ODF2L	outer dense fiber of sperm tails 2 like	ENSG00000122417	46	55	21	25	36.75	Cytoplasm	other
OFD1	OFD1, centriole and centriolar satellite protein	ENSG00000046651	41	190	89	116	109	Plasma Membrane	other
OGT	O-linked N-acetylglucosamine (GlcNAc) transferase	ENSG00000147162	12	56	10	146	56	Cytoplasm	enzyme
OIP5-AS1	OIP5 antisense RNA 1 [Source:HGNC Symbol	ENSG00000247556	278	340	250	292	290
OLA1	Obg-like ATPase 1	ENSG00000138430	34	22	31	33	30	Cytoplasm	enzyme
OPA1	OPA1, mitochondrial dynamin like GTPase	ENSG00000198836	354	724	389	1107	643.5	Cytoplasm	enzyme
OPTN	optineurin	ENSG00000123240	4903	4286	6691	8730	6152.5	Cytoplasm	other
OR2W3	olfactory receptor family 2 subfamily W member 3	ENSG00000238243	69	70	77	146	90.5	Plasma Membrane	G-protein coupled receptor
OR51AB1P	olfactory receptor family 51 subfamily AB member 1 pseudogene [Source:HGNC Symbol	ENSG00000229093	36	72	28	20	39
ORC3	origin recognition complex subunit 3	ENSG00000135336	7	11	7	24	12.25	Nucleus	other
ORMDL3	ORMDL sphingolipid biosynthesis regulator 3	ENSG00000172057	134	232	401	344	277.75	Cytoplasm	other
OSBP2	oxysterol binding protein 2	ENSG00000184792	177	413	322	298	302.5	Cytoplasm	other
OSBPL2	oxysterol binding protein like 2	ENSG00000130703	73	55	144	91	90.75	Cytoplasm	other
OSBPL9	oxysterol binding protein like 9	ENSG00000117859	12	6	16	7	10.25	Cytoplasm	other
OSER1	oxidative stress responsive serine rich 1	ENSG00000132823	294	360	324	923	475.25	Other	enzyme
OSER1-AS1	OSER1 antisense RNA 1 (head to head) [Source:HGNC Symbol	ENSG00000223891	67	162	102	108	109.75
OST4	oligosaccharyltransferase complex subunit 4, non-catalytic	ENSG00000228474	1834	1924	2819	3874	2612.75	Other	other
OXSR1	oxidative stress responsive 1	ENSG00000172939	6	44	19	15	21	Nucleus	kinase
PA2G4	proliferation-associated 2G4	ENSG00000170515	523	259	481	639	475.5	Nucleus	transcription regulator
PABPC1	poly(A) binding protein cytoplasmic 1	ENSG00000070756	80	86	89	190	111.25	Cytoplasm	translation regulator
PAGE2	PAGE family member 2 [Source:HGNC Symbol	ENSG00000234068	17	25	40	64	36.5
PAGE2/PAGE2B	PAGE family member 2	ENSG00000238269	444	431	475	480	457.5	Other	other
PAIP1	poly(A) binding protein interacting protein 1	ENSG00000172239	12	28	15	16	17.75	Cytoplasm	translation regulator
PAIP2	poly(A) binding protein interacting protein 2	ENSG00000120727	209	224	393	425	312.75	Cytoplasm	translation regulator
PAK1IP1	PAK1 interacting protein 1	ENSG00000111845	18	46	47	53	41	Nucleus	other
PAK2	p21 (RAC1) activated kinase 2	ENSG00000180370	34	47	41	38	40	Cytoplasm	kinase
PANK3	pantothenate kinase 3	ENSG00000120137	24	33	18	30	26.25	Cytoplasm	kinase
PAPD4	PAP associated domain containing 4	ENSG00000164329	203	230	192	532	289.25	Nucleus	enzyme
PAPOLA	poly(A) polymerase alpha	ENSG00000090060	103	155	65	111	108.5	Nucleus	enzyme
PAQR9	progestin and adipoQ receptor family member 9	ENSG00000188582	504	359	105	949	479.25	Plasma Membrane	other
PARG	poly(ADP-ribose) glycohydrolase	ENSG00000227345	42	84	31	111	67	Cytoplasm	enzyme
PARK7	Parkinsonism associated deglycase	ENSG00000116288	90	77	141	76	96	Nucleus	enzyme
PARN	poly(A)-specific ribonuclease	ENSG00000140694	48	114	56	39	64.25	Nucleus	enzyme
PARP11	poly(ADP-ribose) polymerase family member 11	ENSG00000111224	50	28	24	46	37	Nucleus	enzyme
PARPBP	PARP1 binding protein	ENSG00000185480	22	25	47	66	40	Nucleus	other
PBX1	PBX homeobox 1	ENSG00000185630	13	29	64	225	82.75	Nucleus	transcription regulator
PCBP2	poly(rC) binding protein 2	ENSG00000197111	645	750	653	697	686.25	Nucleus	other
PCCB	propionyl-CoA carboxylase beta subunit	ENSG00000114054	6	14	9	8	9.25	Cytoplasm	enzyme
PCF11	PCF11 cleavage and polyadenylation factor subunit	ENSG00000165494	65	228	19	82	98.5	Nucleus	other
PCGF5	polycomb group ring finger 5	ENSG00000180628	1216	1261	1010	1615	1275.5	Cytoplasm	other
PCGF6	polycomb group ring finger 6	ENSG00000156374	113	231	94	220	164.5	Nucleus	transcription regulator
PCM1	pericentriolar material 1	ENSG00000078674	122	140	47	103	103	Cytoplasm	other
PCMT1	protein-L-isoaspartate (D-aspartate) O-methyltransferase	ENSG00000120265	7	38	21	34	25	Cytoplasm	enzyme
PCMTD1	protein-L-isoaspartate (D-aspartate) O-methyltransferase domain containing 1	ENSG00000168300	283	249	182	273	246.75	Cytoplasm	enzyme
PCMTD2	protein-L-isoaspartate (D-aspartate) O-methyltransferase domain containing 2	ENSG00000203880	29	23	39	60	37.75	Cytoplasm	enzyme
PCNP	PEST proteolytic signal containing nuclear protein	ENSG00000081154	128	62	49	202	110.25	Nucleus	other
PCNT	pericentrin	ENSG00000160299	305	535	206	347	348.25	Cytoplasm	other
PDAP1	PDGFA associated protein 1	ENSG00000106244	55	95	94	151	98.75	Cytoplasm	other
PDCD10	programmed cell death 10	ENSG00000114209	818	1179	478	1410	971.25	Cytoplasm	other
PDCL	phosducin like	ENSG00000136940	85	71	15	13	46	Cytoplasm	enzyme
PDE2A	phosphodiesterase 2A	ENSG00000186642	42	18	12	10	20.5	Cytoplasm	enzyme
PDS5A	PDS5 cohesin associated factor A	ENSG00000121892	40	155	32	126	88.25	Nucleus	other
PDS5B	PDS5 cohesin associated factor B	ENSG00000083642	10	66	34	20	32.5	Nucleus	other
PDXDC1	pyridoxal dependent decarboxylase domain containing 1	ENSG00000179889	32	114	18	108	68	Cytoplasm	other
PDZK1IP1	PDZK1 interacting protein 1	ENSG00000162366	3501	7496	7713	7246	6489	Extracellular Space	other
PEAK1	pseudopodium enriched atypical kinase 1	ENSG00000173517	33	64	31	84	53	Plasma Membrane	kinase
PEF1	penta-EF-hand domain containing 1	ENSG00000162517	33	166	60	171	107.5	Cytoplasm	other
PELP1	proline, glutamate and leucine rich protein 1	ENSG00000141456	5	17	19	41	20.5	Nucleus	other
PET100	PET100 homolog	ENSG00000229833	12	5	10	23	12.5	Other	other
PEX1	peroxisomal biogenesis factor 1	ENSG00000127980	17	10	10	9	11.5	Cytoplasm	enzyme
PFDN4	prefoldin subunit 4	ENSG00000101132	5	10	19	19	13.25	Cytoplasm	other
PFDN5	prefoldin subunit 5	ENSG00000123349	5095	5963	9446	11017	7880.25	Nucleus	transcription regulator
PGM2L1	phosphoglucomutase 2 like 1	ENSG00000165434	253	107	94	282	184	Cytoplasm	enzyme
PHB	prohibitin	ENSG00000167085	11	12	39	16	19.5	Nucleus	transcription regulator
PHC3	polyhomeotic homolog 3	ENSG00000173889	162	778	218	564	430.5	Nucleus	transcription regulator
PHF14	PHD finger protein 14	ENSG00000106443	25	92	10	87	53.5	Nucleus	other
PHF20	PHD finger protein 20	ENSG00000025293	28	36	10	23	24.25	Nucleus	other
PHF20L1	PHD finger protein 20-like 1	ENSG00000129292	39	94	37	325	123.75	Other	other
PHF21A	PHD finger protein 21A	ENSG00000135365	123	275	132	307	209.25	Nucleus	enzyme
PHF3	PHD finger protein 3	ENSG00000118482	88	130	70	152	110	Nucleus	other
PHIP	pleckstrin homology domain interacting protein	ENSG00000146247	108	186	37	84	103.75	Nucleus	other
PHLPP2	PH domain and leucine rich repeat protein phosphatase 2	ENSG00000040199	8	21	16	20	16.25	Cytoplasm	enzyme
PHOSPHO1	phosphoethanolamine/phosphocholine phosphatase	ENSG00000173868	150	295	520	474	359.75	Extracellular Space	enzyme
PI4KB	phosphatidylinositol 4-kinase beta	ENSG00000143393	43	56	98	88	71.25	Cytoplasm	kinase
PIAS1	protein inhibitor of activated STAT 1	ENSG00000033800	45	26	38	56	41.25	Nucleus	transcription regulator
PIBF1	progesterone immunomodulatory binding factor 1	ENSG00000083535	23	10	7	5	11.25	Nucleus	other
PICALM	phosphatidylinositol binding clathrin assembly protein	ENSG00000073921	167	437	179	233	254	Cytoplasm	other
PIGC	phosphatidylinositol glycan anchor biosynthesis class C	ENSG00000135845	1867	3018	1558	2437	2220	Cytoplasm	enzyme
PIH1D1	PIH1 domain containing 1	ENSG00000104872	13	15	20	16	16	Nucleus	other
PIK3C3	phosphatidylinositol 3-kinase catalytic subunit type 3	ENSG00000078142	48	144	50	31	68.25	Cytoplasm	kinase
PIK3R1	phosphoinositide-3-kinase regulatory subunit 1	ENSG00000145675	17	159	103	208	121.75	Cytoplasm	kinase
PIM1	Pim-1 proto-oncogene, serine/threonine kinase	ENSG00000137193	846	885	715	1754	1050	Cytoplasm	kinase
PINK1	PTEN induced putative kinase 1	ENSG00000158828	8	20	25	55	27	Cytoplasm	kinase
PIP4K2A	phosphatidylinositol-5-phosphate 4-kinase type 2 alpha	ENSG00000150867	1585	1490	693	1374	1285.5	Cytoplasm	kinase
PITHD1	PITH domain containing 1	ENSG00000057757	48	136	84	75	85.75	Nucleus	other
PITPNB	phosphatidylinositol transfer protein beta	ENSG00000180957	7	45	24	67	35.75	Cytoplasm	transporter
PKIG	protein kinase (cAMP-dependent, catalytic) inhibitor gamma	ENSG00000168734	5	9	136	14	41	Other	other
PKN2	protein kinase N2	ENSG00000065243	456	1092	363	1133	761	Cytoplasm	kinase
PKNOX1	PBX/knotted 1 homeobox 1	ENSG00000160199	25	15	20	21	20.25	Nucleus	transcription regulator
PLBD2	phospholipase B domain containing 2	ENSG00000151176	11	24	19	19	18.25	Extracellular Space	other
PLCL2	phospholipase C like 2	ENSG00000154822	99	111	28	169	101.75	Cytoplasm	enzyme
PLEK2	pleckstrin 2	ENSG00000100558	459	200	1004	475	534.5	Other	other
PLEKHM1P1	pleckstrin homology and RUN domain containing M1 pseudogene 1 [Source:HGNC Symbol	ENSG00000214176	96	79	316	13	126
PLVAP	plasmalemma vesicle associated protein	ENSG00000130300	193	133	639	569	383.5	Plasma Membrane	other
PNISR	PNN interacting serine and arginine rich protein	ENSG00000132424	53	32	32	34	37.75	Nucleus	other
PNKD	paroxysmal nonkinesigenic dyskinesia	ENSG00000127838	5	11	43	6	16.25	Nucleus	other
PNN	pinin, desmosome associated protein	ENSG00000100941	200	424	134	397	288.75	Plasma Membrane	other
PNP	purine nucleoside phosphorylase	ENSG00000198805	299	476	461	494	432.5	Nucleus	enzyme
PNPLA8	patatin like phospholipase domain containing 8	ENSG00000135241	20	16	33	111	45	Cytoplasm	enzyme
PNRC1	proline rich nuclear receptor coactivator 1	ENSG00000146278	386	543	279	634	460.5	Nucleus	other
POC1B	POC1 centriolar protein B	ENSG00000139323	1119	1355	722	1211	1101.75	Cytoplasm	other
POLA1	DNA polymerase alpha 1, catalytic subunit	ENSG00000101868	11	108	50	62	57.75	Nucleus	enzyme
POLDIP3	DNA polymerase delta interacting protein 3	ENSG00000100227	13	31	64	65	43.25	Nucleus	other
POLE2	DNA polymerase epsilon 2, accessory subunit	ENSG00000100479	70	33	16	15	33.5	Nucleus	enzyme
POLE3	DNA polymerase epsilon 3, accessory subunit	ENSG00000148229	11	56	121	31	54.75	Nucleus	enzyme
POLK	polymerase (DNA) kappa	ENSG00000122008	22	115	26	145	77	Nucleus	enzyme
POLL	polymerase (DNA) lambda	ENSG00000166169	450	201	1660	956	816.75	Nucleus	enzyme
POLR1D	RNA polymerase I subunit D	ENSG00000186184	941	488	481	561	617.75	Nucleus	enzyme
POLR2I	RNA polymerase II subunit I	ENSG00000105258	13	22	35	26	24	Nucleus	transcription regulator
POLR2J	RNA polymerase II subunit J	ENSG00000005075	338	262	210	290	275	Nucleus	enzyme
POLR3C	RNA polymerase III subunit C	ENSG00000186141	168	334	304	164	242.5	Nucleus	enzyme
POLR3G	RNA polymerase III subunit G	ENSG00000113356	223	565	222	822	458	Nucleus	enzyme
PPIG	peptidylprolyl isomerase G	ENSG00000138398	62	136	75	85	89.5	Nucleus	enzyme
PPIL4	peptidylprolyl isomerase like 4	ENSG00000131013	87	149	68	178	120.5	Nucleus	enzyme
PPIP5K2	diphosphoinositol pentakisphosphate kinase 2	ENSG00000145725	108	160	24	87	94.75	Cytoplasm	kinase
PPM1A	protein phosphatase, Mg2+/Mn2+ dependent 1A	ENSG00000100614	751	1308	595	1809	1115.75	Cytoplasm	phosphatase
PPME1	protein phosphatase methylesterase 1	ENSG00000214517	98	135	68	127	107	Other	enzyme
PPOX	protoporphyrinogen oxidase	ENSG00000143224	11	50	139	71	67.75	Cytoplasm	enzyme
PPP1CB	protein phosphatase 1 catalytic subunit beta	ENSG00000213639	182	240	112	131	166.25	Cytoplasm	phosphatase
PPP1R11	protein phosphatase 1 regulatory inhibitor subunit 11	ENSG00000204619	68	157	86	125	109	Cytoplasm	other
PPP1R12A	protein phosphatase 1 regulatory subunit 12A	ENSG00000058272	93	361	43	363	215	Cytoplasm	phosphatase
PPP1R32	protein phosphatase 1 regulatory subunit 32	ENSG00000162148	11	37	41	34	30.75	Other	other
PPP1R7	protein phosphatase 1 regulatory subunit 7	ENSG00000115685	12	24	30	50	29	Nucleus	phosphatase
PPP2R3C	protein phosphatase 2 regulatory subunit B''gamma	ENSG00000092020	46	54	37	92	57.25	Cytoplasm	other
PPP2R5B	protein phosphatase 2 regulatory subunit B'beta	ENSG00000068971	40	44	101	129	78.5	Cytoplasm	phosphatase
PPP3R1	protein phosphatase 3 regulatory subunit B, alpha	ENSG00000221823	21	38	26	32	29.25	Cytoplasm	phosphatase
PPP4R2	protein phosphatase 4 regulatory subunit 2	ENSG00000163605	52	132	45	158	96.75	Cytoplasm	other
PPP4R3B	protein phosphatase 4 regulatory subunit 3B	ENSG00000275052	6	43	23	70	35.5	Nucleus	other
PPP6R3	protein phosphatase 6 regulatory subunit 3	ENSG00000110075	120	363	129	314	231.5	Cytoplasm	other
PQBP1	polyglutamine binding protein 1	ENSG00000102103	125	266	215	226	208	Nucleus	transcription regulator
PRDM2	PR domain 2	ENSG00000116731	50	61	54	83	62	Nucleus	transcription regulator
PRDX1	peroxiredoxin 1	ENSG00000117450	40	89	120	62	77.75	Cytoplasm	enzyme
PRDX2	peroxiredoxin 2	ENSG00000167815	1770	1598	1888	1567	1705.75	Cytoplasm	enzyme
PRDX5	peroxiredoxin 5	ENSG00000126432	1954	1661	5555	6193	3840.75	Cytoplasm	enzyme
PRDX6	peroxiredoxin 6	ENSG00000117592	29033	22672	32325	35173	29800.8	Cytoplasm	enzyme
PRELID3B	PRELI domain containing 3B	ENSG00000101166	21	11	17	5	13.5	Cytoplasm	other
PRIM1	primase (DNA) subunit 1	ENSG00000198056	28	128	24	126	76.5	Nucleus	enzyme
PRKAR2B	protein kinase cAMP-dependent type II regulatory subunit beta	ENSG00000005249	48	15	14	34	27.75	Cytoplasm	kinase
PRKDC	protein kinase, DNA-activated, catalytic polypeptide	ENSG00000253729	8	28	26	31	23.25	Nucleus	kinase
PRKRIP1	PRKR interacting protein 1 (IL11 inducible)	ENSG00000128563	14	23	21	12	17.5	Nucleus	other
PRMT2	protein arginine methyltransferase 2	ENSG00000160310	13	16	105	84	54.5	Nucleus	enzyme
PRPF40A	pre-mRNA processing factor 40 homolog A	ENSG00000196504	22	111	63	139	83.75	Nucleus	other
PRPF4B	pre-mRNA processing factor 4B	ENSG00000112739	15	98	13	60	46.5	Nucleus	kinase
PRPSAP2	phosphoribosyl pyrophosphate synthetase associated protein 2	ENSG00000141127	28	52	31	183	73.5	Other	other
PRR11	proline rich 11	ENSG00000068489	9	45	22	23	24.75	Other	other
PRR34-AS1	PRR34 antisense RNA 1 [Source:HGNC Symbol	ENSG00000241990	16	42	37	75	42.5
PRR5	proline rich 5	ENSG00000186654	33	45	94	112	71	Cytoplasm	other
PRRC2C	proline rich coiled-coil 2C	ENSG00000117523	336	835	429	923	630.75	Other	other
PSAP	prosaposin	ENSG00000197746	170	261	161	286	219.5	Extracellular Space	other
PSIP1	PC4 and SFRS1 interacting protein 1	ENSG00000164985	180	449	151	445	306.25	Nucleus	transcription regulator
PSMA3-AS1	PSMA3 antisense RNA 1	ENSG00000257621	26	15	5	40	21.5	Other	other
PSMB6	proteasome subunit beta 6	ENSG00000142507	11	53	48	61	43.25	Nucleus	peptidase
PSMB7	proteasome subunit beta 7	ENSG00000136930	109	233	410	348	275	Cytoplasm	peptidase
PSMC3	proteasome 26S subunit, ATPase 3	ENSG00000165916	39	97	158	166	115	Nucleus	transcription regulator
PSMD1	proteasome 26S subunit, non-ATPase 1	ENSG00000173692	90	139	261	185	168.75	Cytoplasm	other
PSMD11	proteasome 26S subunit, non-ATPase 11	ENSG00000108671	34	57	93	77	65.25	Cytoplasm	other
PSMD2	proteasome 26S subunit, non-ATPase 2	ENSG00000175166	62	126	126	49	90.75	Cytoplasm	other
PSMD4	proteasome 26S subunit, non-ATPase 4	ENSG00000159352	683	1032	1361	924	1000	Cytoplasm	other
PSMD9	proteasome 26S subunit, non-ATPase 9	ENSG00000110801	9	5	39	9	15.5	Cytoplasm	transcription regulator
PSME1	proteasome activator subunit 1	ENSG00000092010	271	233	417	218	284.75	Cytoplasm	other
PSME4	proteasome activator subunit 4	ENSG00000068878	295	213	231	274	253.25	Cytoplasm	other
PSMF1	proteasome inhibitor subunit 1	ENSG00000125818	7911	5128	20015	12262	11329	Cytoplasm	other
PTBP3	polypyrimidine tract binding protein 3	ENSG00000119314	17	34	7	12	17.5	Nucleus	other
PTEN	phosphatase and tensin homolog	ENSG00000171862	31	136	15	76	64.5	Cytoplasm	phosphatase
PTGES3	prostaglandin E synthase 3	ENSG00000110958	86	127	115	94	105.5	Cytoplasm	enzyme
PTK2B	protein tyrosine kinase 2 beta	ENSG00000120899	82	302	403	590	344.25	Cytoplasm	kinase
PTMA	prothymosin, alpha	ENSG00000187514	62	34	19	77	48	Nucleus	other
PTMS	parathymosin	ENSG00000159335	344	876	445	999	666	Nucleus	other
PTP4A2	protein tyrosine phosphatase type IVA, member 2	ENSG00000184007	28	68	75	211	95.5	Cytoplasm	phosphatase
PTPN11	protein tyrosine phosphatase, non-receptor type 11	ENSG00000179295	36	28	18	22	26	Cytoplasm	phosphatase
PTPN2	protein tyrosine phosphatase, non-receptor type 2	ENSG00000175354	11	33	14	11	17.25	Cytoplasm	phosphatase
PTPN4	protein tyrosine phosphatase, non-receptor type 4	ENSG00000088179	135	290	96	458	244.75	Cytoplasm	phosphatase
PTPRA	protein tyrosine phosphatase, receptor type A	ENSG00000132670	39	169	30	82	80	Plasma Membrane	phosphatase
PTTG1	pituitary tumor-transforming 1	ENSG00000164611	7	32	17	16	18	Nucleus	transcription regulator
PTTG1IP	pituitary tumor-transforming 1 interacting protein	ENSG00000183255	7	20	16	49	23	Nucleus	other
PUM3	pumilio RNA binding family member 3	ENSG00000080608	15	36	17	15	20.75	Nucleus	other
PWWP2A	PWWP domain containing 2A	ENSG00000170234	34	69	49	25	44.25	Other	other
QKI	QKI, KH domain containing RNA binding	ENSG00000112531	11	128	46	248	108.25	Nucleus	other
QRICH1	glutamine rich 1	ENSG00000198218	26	28	14	58	31.5	Nucleus	other
QSOX2	quiescin sulfhydryl oxidase 2	ENSG00000165661	32	86	38	40	49	Other	enzyme
R3HDM4	R3H domain containing 4	ENSG00000198858	1528	1230	3024	1686	1867	Other	other
RAB10	RAB10, member RAS oncogene family	ENSG00000084733	25	63	14	22	31	Cytoplasm	enzyme
RAB13	RAB13, member RAS oncogene family	ENSG00000143545	58	153	84	234	132.25	Plasma Membrane	enzyme
RAB2B	RAB2B, member RAS oncogene family	ENSG00000129472	897	1564	1156	1349	1241.5	Plasma Membrane	enzyme
RAB3GAP1	RAB3 GTPase activating protein catalytic subunit 1	ENSG00000115839	36	41	35	23	33.75	Cytoplasm	other
RAB3IL1	RAB3A interacting protein like 1	ENSG00000167994	20	27	408	73	132	Other	other
RAB3IP	RAB3A interacting protein	ENSG00000127328	106	253	140	222	180.25	Cytoplasm	other
RAB5A	RAB5A, member RAS oncogene family	ENSG00000144566	146	461	151	110	217	Cytoplasm	enzyme
RAB5B	RAB5B, member RAS oncogene family	ENSG00000111540	148	541	643	803	533.75	Cytoplasm	enzyme
RAB5C	RAB5C, member RAS oncogene family	ENSG00000108774	11	17	140	35	50.75	Cytoplasm	enzyme
RABEP1	rabaptin, RAB GTPase binding effector protein 1	ENSG00000029725	47	19	10	41	29.25	Cytoplasm	transporter
RABGAP1L	RAB GTPase activating protein 1 like	ENSG00000152061	647	2461	746	1718	1393	Cytoplasm	other
RACK1	receptor for activated C kinase 1	ENSG00000204628	611	780	1259	960	902.5	Cytoplasm	enzyme
RAD17	RAD17 checkpoint clamp loader component	ENSG00000152942	38	23	28	98	46.75	Nucleus	enzyme
RAD18	RAD18, E3 ubiquitin protein ligase	ENSG00000070950	27	26	7	55	28.75	Nucleus	other
RAD21	RAD21 cohesin complex component	ENSG00000164754	20	16	22	48	26.5	Nucleus	transcription regulator
RAD23A	RAD23 homolog A, nucleotide excision repair protein	ENSG00000179262	620	433	1825	773	912.75	Nucleus	other
RAD50	RAD50 double strand break repair protein	ENSG00000113522	178	632	169	830	452.25	Nucleus	enzyme
RALBP1	ralA binding protein 1	ENSG00000017797	117	200	101	309	181.75	Cytoplasm	enzyme
RANBP10	RAN binding protein 10	ENSG00000141084	581	343	941	961	706.5	Cytoplasm	other
RANBP9	RAN binding protein 9	ENSG00000010017	72	211	85	90	114.5	Nucleus	other
RAP1A	RAP1A, member of RAS oncogene family	ENSG00000116473	52	66	53	78	62.25	Cytoplasm	enzyme
RAP1GAP	RAP1 GTPase activating protein	ENSG00000076864	10	6	33	44	23.25	Cytoplasm	other
RAP2A	RAP2A, member of RAS oncogene family	ENSG00000125249	8	55	20	18	25.25	Plasma Membrane	enzyme
RAPGEF2	Rap guanine nucleotide exchange factor 2	ENSG00000109756	66	105	64	25	65	Cytoplasm	other
RARS	arginyl-tRNA synthetase	ENSG00000113643	66	147	35	74	80.5	Cytoplasm	enzyme
RASA2	RAS p21 protein activator 2	ENSG00000155903	18	48	9	16	22.75	Cytoplasm	other
RASGRP3	RAS guanyl releasing protein 3	ENSG00000152689	110	420	23	70	155.75	Cytoplasm	other
RB1	RB transcriptional corepressor 1	ENSG00000139687	69	52	11	35	41.75	Nucleus	transcription regulator
RB1CC1	RB1 inducible coiled-coil 1	ENSG00000023287	74	78	21	104	69.25	Nucleus	other
RBBP7	RB binding protein 7, chromatin remodeling factor	ENSG00000102054	12	25	40	49	31.5	Nucleus	transcription regulator
RBBP8	RB binding protein 8, endonuclease	ENSG00000101773	118	321	60	375	218.5	Nucleus	enzyme
RBL1	RB transcriptional corepressor like 1	ENSG00000080839	51	114	12	86	65.75	Nucleus	transcription regulator
RBL2	RB transcriptional corepressor like 2	ENSG00000103479	16	36	8	18	19.5	Nucleus	other
RBM19	RNA binding motif protein 19	ENSG00000122965	8	12	54	44	29.5	Nucleus	other
RBM23	RNA binding motif protein 23	ENSG00000100461	107	329	195	317	237	Nucleus	other
RBM25	RNA binding motif protein 25	ENSG00000119707	64	190	102	107	115.75	Nucleus	other
RBM26	RNA binding motif protein 26	ENSG00000139746	45	48	40	117	62.5	Other	other
RBM3	RNA binding motif (RNP1, RRM) protein 3	ENSG00000102317	8	27	13	43	22.75	Cytoplasm	other
RBM33	RNA binding motif protein 33	ENSG00000184863	140	166	92	197	148.75	Other	other
RBM38	RNA binding motif protein 38	ENSG00000132819	205	106	340	479	282.5	Nucleus	other
RBM39	RNA binding motif protein 39	ENSG00000131051	287	711	206	723	481.75	Nucleus	transcription regulator
RBM41	RNA binding motif protein 41	ENSG00000089682	95	121	48	240	126	Other	other
RBM8A	RNA binding motif protein 8A	ENSG00000265241	151	121	53	188	128.25	Nucleus	other
RBX1	ring-box 1	ENSG00000100387	331	292	583	710	479	Cytoplasm	enzyme
RC3H2	ring finger and CCCH-type domains 2	ENSG00000056586	10	234	66	77	96.75	Plasma Membrane	enzyme
RCOR3	REST corepressor 3	ENSG00000117625	75	78	36	88	69.25	Nucleus	other
RDX	radixin	ENSG00000137710	125	184	139	332	195	Cytoplasm	other
REEP3	receptor accessory protein 3	ENSG00000165476	16	65	30	87	49.5	Other	other
REL	REL proto-oncogene, NF-kB subunit	ENSG00000162924	22	13	18	69	30.5	Nucleus	transcription regulator
RERE	arginine-glutamic acid dipeptide repeats	ENSG00000142599	20	97	43	106	66.5	Nucleus	transcription regulator
REV1	REV1, DNA directed polymerase	ENSG00000135945	32	86	32	45	48.75	Nucleus	enzyme
REV3L	REV3 like, DNA directed polymerase zeta catalytic subunit	ENSG00000009413	38	46	8	51	35.75	Nucleus	enzyme
REXO2	RNA exonuclease 2	ENSG00000076043	106	113	220	164	150.75	Cytoplasm	enzyme
RFC1	replication factor C subunit 1	ENSG00000035928	157	431	111	421	280	Nucleus	transcription regulator
RFX3	regulatory factor X3	ENSG00000080298	83	271	138	264	189	Nucleus	transcription regulator
RFXANK	regulatory factor X associated ankyrin containing protein	ENSG00000064490	52	64	161	171	112	Nucleus	transcription regulator
RGCC	regulator of cell cycle	ENSG00000102760	35	100	30	33	49.5	Cytoplasm	other
RGS10	regulator of G-protein signaling 10	ENSG00000148908	352	222	265	241	270	Cytoplasm	other
RGS6	regulator of G-protein signaling 6	ENSG00000182732	88	168	52	90	99.5	Cytoplasm	enzyme
RGS9	regulator of G-protein signaling 9	ENSG00000108370	9	9	6	9	8.25	Cytoplasm	enzyme
RHAG	Rh-associated glycoprotein	ENSG00000112077	72	95	91	255	128.25	Plasma Membrane	peptidase
RHBDD1	rhomboid domain containing 1	ENSG00000144468	41	63	40	23	41.75	Extracellular Space	peptidase
RHCE/RHD	Rh blood group D antigen	ENSG00000188672	49	46	111	142	87	Plasma Membrane	transporter
RHD	Rh blood group D antigen [Source:HGNC Symbol	ENSG00000187010	49	46	111	138	86
RHOBTB3	Rho related BTB domain containing 3	ENSG00000164292	51	157	83	248	134.75	Cytoplasm	enzyme
RHOT1	ras homolog family member T1	ENSG00000126858	154	352	164	503	293.25	Cytoplasm	enzyme
RICTOR	RPTOR independent companion of MTOR complex 2	ENSG00000164327	23	6	7	43	19.75	Cytoplasm	other
RIF1	replication timing regulatory factor 1	ENSG00000080345	44	6	24	68	35.5	Nucleus	other
RILP	Rab interacting lysosomal protein	ENSG00000167705	86	84	138	88	99	Cytoplasm	other
RIOK1	RIO kinase 1	ENSG00000124784	23	7	65	41	34	Other	kinase
RIOK3	RIO kinase 3	ENSG00000101782	6677	8460	7273	11830	8560	Cytoplasm	kinase
RMND5A	required for meiotic nuclear division 5 homolog A	ENSG00000153561	80	448	221	811	390	Nucleus	other
RN7SK	RNA, 7SK small nuclear	ENSG00000202198	62	122	38	132	88.5	Nucleus	other
RN7SL2	RNA, 7SL, cytoplasmic 2 [Source:HGNC Symbol	ENSG00000274012	240	850	522	1399	752.75
RNASEH2B	ribonuclease H2 subunit B	ENSG00000136104	10	10	5	37	15.5	Nucleus	enzyme
RNASEK	ribonuclease K	ENSG00000219200	15	47	35	60	39.25	Other	peptidase
RNF10	ring finger protein 10	ENSG00000022840	2044	1938	1900	2952	2208.5	Cytoplasm	enzyme
RNF11	ring finger protein 11	ENSG00000123091	217	447	126	508	324.5	Cytoplasm	enzyme
RNF111	ring finger protein 111	ENSG00000157450	5	17	46	32	25	Nucleus	enzyme
RNF115	ring finger protein 115	ENSG00000265491	38	51	33	18	35	Cytoplasm	enzyme
RNF123	ring finger protein 123	ENSG00000164068	124	56	229	123	133	Cytoplasm	other
RNF14	ring finger protein 14	ENSG00000013561	489	694	486	943	653	Other	transcription regulator
RNF145	ring finger protein 145	ENSG00000145860	5	47	6	79	34.25	Other	other
RNF168	ring finger protein 168	ENSG00000163961	233	724	182	534	418.25	Nucleus	enzyme
RNF169	ring finger protein 169	ENSG00000166439	91	188	44	132	113.75	Nucleus	other
RNF181	ring finger protein 181	ENSG00000168894	31	48	123	52	63.5	Other	enzyme
RNF187	ring finger protein 187	ENSG00000168159	20	58	82	98	64.5	Nucleus	enzyme
RNF19A	ring finger protein 19A, RBR E3 ubiquitin protein ligase	ENSG00000034677	50	304	72	384	202.5	Nucleus	enzyme
RNF20	ring finger protein 20	ENSG00000155827	112	108	67	134	105.25	Nucleus	enzyme
RNF214	ring finger protein 214	ENSG00000167257	33	43	51	83	52.5	Other	other
RNF219	ring finger protein 219	ENSG00000152193	61	43	6	148	64.5	Other	other
RNF41	ring finger protein 41	ENSG00000181852	26	15	58	25	31	Cytoplasm	enzyme
RNF5	ring finger protein 5	ENSG00000204308	178	215	231	270	223.5	Cytoplasm	enzyme
RNPC3	RNA binding region (RNP1, RRM) containing 3	ENSG00000185946	19	65	74	124	70.5	Nucleus	other
ROCK1	Rho associated coiled-coil containing protein kinase 1	ENSG00000067900	146	322	146	267	220.25	Cytoplasm	kinase
ROCK2	Rho associated coiled-coil containing protein kinase 2	ENSG00000134318	32	116	60	44	63	Cytoplasm	kinase
ROGDI	rogdi homolog	ENSG00000067836	27	14	66	51	39.5	Nucleus	other
RP11-1299A16.3	OTTHUMG00000175889 (Vega gene) is an external reference matched to Gene ENSG00000260641	ENSG00000260641	58	181	58	106	100.75
RP11-133K1.8	OTTHUMG00000176890 (Vega gene) is an external reference matched to Gene ENSG00000279537	ENSG00000279537	24	31	24	44	30.75
RP11-162D16.2	OTTHUMG00000020591 (Vega gene) is an external reference matched to Gene ENSG00000227355	ENSG00000227355	12	87	29	82	52.5
RP11-16F15.2	OTTHUMG00000158305 (Vega gene) is an external reference matched to Gene ENSG00000239470	ENSG00000239470	13	5	12	25	13.75
RP11-203F10.6	OTTHUMG00000057669 (Vega gene) is an external reference matched to Gene ENSG00000219133	ENSG00000219133	5	6	14	35	15
RP11-206L10.8	OTTHUMG00000002403 (Vega gene) is an external reference matched to Gene ENSG00000230092	ENSG00000230092	153	120	110	242	156.25
RP11-20D14.6	OTTHUMG00000168221 (Vega gene) is an external reference matched to Gene ENSG00000249790	ENSG00000249790	3111	812	1585	322	1457.5
RP11-213G2.3	OTTHUMG00000020127 (Vega gene) is an external reference matched to Gene ENSG00000165121	ENSG00000165121	13	114	21	108	64
RP11-245D16.4	OTTHUMG00000187321 (Vega gene) is an external reference matched to Gene ENSG00000278238	ENSG00000278238	46	14	43	43	36.5
RP11-24F11.2	OTTHUMG00000156326 (Vega gene) is an external reference matched to Gene ENSG00000223552	ENSG00000223552	440	150	422	135	286.75
RP11-255H23.2	OTTHUMG00000158123 (Vega gene) is an external reference matched to Gene ENSG00000233836	ENSG00000233836	5	34	23	62	31
RP11-274B21.1	OTTHUMG00000158229 (Vega gene) is an external reference matched to Gene ENSG00000280828	ENSG00000280828	8	17	9	38	18
RP11-295G20.2	OTTHUMG00000039487 (Vega gene) is an external reference matched to Gene ENSG00000233461	ENSG00000233461	13	14	10	24	15.25
RP11-35G9.3	OTTHUMG00000132739 (Vega gene) is an external reference matched to Gene ENSG00000267040	ENSG00000267040	17	34	17	38	26.5
RP11-475C16.1	OTTHUMG00000015859 (Vega gene) is an external reference matched to Gene ENSG00000218426	ENSG00000218426	14	11	14	6	11.25
RP11-522I20.3	OTTHUMG00000166241 (Vega gene) is an external reference matched to Gene ENSG00000254473	ENSG00000254473	15	62	44	100	55.25
RP11-574K11.24	OTTHUMG00000176185 (Vega gene) is an external reference matched to Gene ENSG00000279088	ENSG00000279088	71	79	176	266	148
RP11-57H12.3	OTTHUMG00000010849 (Vega gene) is an external reference matched to Gene ENSG00000226026	ENSG00000226026	12	34	27	65	34.5
RP11-587D21.1	OTTHUMG00000166149 (Vega gene) is an external reference matched to Gene ENSG00000240036	ENSG00000240036	15	15	9	9	12
RP11-613M5.2	OTTHUMG00000157622 (Vega gene) is an external reference matched to Gene ENSG00000243071	ENSG00000243071	12	12	8	31	15.75
RP11-632K20.7	OTTHUMG00000175399 (Vega gene) is an external reference matched to Gene ENSG00000223509	ENSG00000223509	373	438	52	624	371.75
RP11-63D14.1	OTTHUMG00000166457 (Vega gene) is an external reference matched to Gene ENSG00000255477	ENSG00000255477	37	19	20	19	23.75
RP11-678G14.3	OTTHUMG00000182863 (Vega gene) is an external reference matched to Gene ENSG00000268555	ENSG00000268555	160	1521	871	2141	1173.25
RP11-712B9.2	OTTHUMG00000167830 (Vega gene) is an external reference matched to Gene ENSG00000245552	ENSG00000245552	298	759	248	862	541.75
RP11-734J24.1	OTTHUMG00000158594 (Vega gene) is an external reference matched to Gene ENSG00000243181	ENSG00000243181	19	24	29	35	26.75
RP11-77H9.8	OTTHUMG00000176992 (Vega gene) is an external reference matched to Gene ENSG00000260979	ENSG00000260979	237	77	331	218	215.75
RP11-826N14.4	OTTHUMG00000163178 (Vega gene) is an external reference matched to Gene ENSG00000251623	ENSG00000251623	8	6	15	5	8.5
RP11-84E17.1	OTTHUMG00000192196 (Vega gene) is an external reference matched to Gene ENSG00000279483	ENSG00000279483	61	100	67	133	90.25
RP11-85G21.3	OTTHUMG00000185718 (Vega gene) is an external reference matched to Gene ENSG00000271736	ENSG00000271736	356	841	306	931	608.5
RP11-864N7.2	OTTHUMG00000158412 (Vega gene) is an external reference matched to Gene ENSG00000227615	ENSG00000227615	22	42	48	81	48.25
RP11-881M11.2	OTTHUMG00000167799 (Vega gene) is an external reference matched to Gene ENSG00000257052	ENSG00000257052	20	38	53	72	45.75
RP11-96H19.1	OTTHUMG00000169473 (Vega gene) is an external reference matched to Gene ENSG00000257261	ENSG00000257261	16	28	44	33	30.25
RP3-467D16.3	OTTHUMG00000191399 (Vega gene) is an external reference matched to Gene ENSG00000282024	ENSG00000282024	96	54	15	69	58.5
RP5-1154L15.2	OTTHUMG00000168057 (Vega gene) is an external reference matched to Gene ENSG00000256020	ENSG00000256020	166	325	304	1162	489.25
RP5-882C2.2	OTTHUMG00000176046 (Vega gene) is an external reference matched to Gene ENSG00000260793	ENSG00000260793	23	11	9	14	14.25
RPIA	ribose 5-phosphate isomerase A	ENSG00000153574	762	913	518	872	766.25	Cytoplasm	enzyme
RPL10	ribosomal protein L10	ENSG00000147403	205	429	467	216	329.25	Cytoplasm	other
RPL11	ribosomal protein L11	ENSG00000142676	404	546	465	711	531.5	Cytoplasm	other
RPL12	ribosomal protein L12	ENSG00000197958	3031	4048	2611	5635	3831.25	Nucleus	other
RPL12P4	ribosomal protein L12 pseudogene 4 [Source:HGNC Symbol	ENSG00000185834	5	10	5	16	9
RPL13	ribosomal protein L13	ENSG00000167526	40	42	163	226	117.75	Nucleus	other
RPL13A	ribosomal protein L13a	ENSG00000142541	308	488	566	736	524.5	Cytoplasm	other
RPL14	ribosomal protein L14	ENSG00000188846	77	95	134	139	111.25	Cytoplasm	other
RPL15	ribosomal protein L15	ENSG00000174748	679	951	1208	1405	1060.75	Cytoplasm	other
RPL15P3	ribosomal protein L15 pseudogene 3 [Source:HGNC Symbol	ENSG00000212802	10	6	15	8	9.75
RPL18	ribosomal protein L18	ENSG00000063177	106	81	370	232	197.25	Cytoplasm	other
RPL18A	ribosomal protein L18a	ENSG00000105640	591	430	1758	1597	1094	Cytoplasm	other
RPL18AP3	ribosomal protein L18a pseudogene 3 [Source:HGNC Symbol	ENSG00000213442	14	8	28	10	15
RPL19	ribosomal protein L19	ENSG00000108298	610	1067	1117	1255	1012.25	Cytoplasm	other
RPL21	ribosomal protein L21	ENSG00000122026	41158	45678	45207	94236	56569.8	Cytoplasm	other
RPL21P119	ribosomal protein L21 pseudogene 119 [Source:HGNC Symbol	ENSG00000220793	16	33	16	30	23.75
RPL21P120	ribosomal protein L21 pseudogene 120 [Source:HGNC Symbol	ENSG00000244582	26	18	20	66	32.5
RPL21P134	ribosomal protein L21 pseudogene 134 [Source:HGNC Symbol	ENSG00000233254	5	7	6	17	8.75
RPL21P16	ribosomal protein L21 pseudogene 16 [Source:HGNC Symbol	ENSG00000220842	146	110	99	227	145.5
RPL21P28	ribosomal protein L21 pseudogene 28 [Source:HGNC Symbol	ENSG00000220749	100	133	120	272	156.25
RPL21P75	ribosomal protein L21 pseudogene 75 [Source:HGNC Symbol	ENSG00000213860	195	141	224	247	201.75
RPL22	ribosomal protein L22	ENSG00000116251	27	31	59	64	45.25	Nucleus	other
RPL23	ribosomal protein L23	ENSG00000125691	12	5	43	35	23.75	Cytoplasm	other
RPL23A	ribosomal protein L23a	ENSG00000198242	560	851	982	1350	935.75	Cytoplasm	other
RPL24	ribosomal protein L24	ENSG00000114391	305	311	328	629	393.25	Cytoplasm	other
RPL26	ribosomal protein L26	ENSG00000161970	134	197	128	146	151.25	Cytoplasm	other
RPL27	ribosomal protein L27	ENSG00000131469	141	119	149	204	153.25	Cytoplasm	other
RPL27A	ribosomal protein L27a	ENSG00000166441	1056	1042	1828	1711	1409.25	Cytoplasm	other
RPL28	ribosomal protein L28	ENSG00000108107	173	154	335	204	216.5	Cytoplasm	other
RPL29	ribosomal protein L29	ENSG00000162244	223	417	608	593	460.25	Cytoplasm	other
RPL3	ribosomal protein L3	ENSG00000100316	336	1009	1169	1616	1032.5	Nucleus	other
RPL30	ribosomal protein L30	ENSG00000156482	1177	1614	1557	1874	1555.5	Cytoplasm	other
RPL31	ribosomal protein L31	ENSG00000071082	4123	4953	4400	7556	5258	Cytoplasm	other
RPL32	ribosomal protein L32	ENSG00000144713	2885	3650	3344	5022	3725.25	Cytoplasm	other
RPL34	ribosomal protein L34	ENSG00000109475	504	332	887	752	618.75	Cytoplasm	other
RPL35	ribosomal protein L35	ENSG00000136942	21	60	45	36	40.5	Cytoplasm	other
RPL35A	ribosomal protein L35a	ENSG00000182899	2183	1769	2107	3026	2271.25	Cytoplasm	other
RPL36	ribosomal protein L36	ENSG00000130255	276	181	305	433	298.75	Cytoplasm	other
RPL36AL	ribosomal protein L36a like	ENSG00000165502	461	1149	621	749	745	Cytoplasm	other
RPL37	ribosomal protein L37	ENSG00000145592	328	538	877	1068	702.75	Cytoplasm	other
RPL37A	ribosomal protein L37a	ENSG00000197756	178	312	711	608	452.25	Cytoplasm	other
RPL38	ribosomal protein L38	ENSG00000172809	1123	1267	1220	1795	1351.25	Cytoplasm	other
RPL39	ribosomal protein L39	ENSG00000198918	323	410	323	572	407	Cytoplasm	other
RPL4	ribosomal protein L4	ENSG00000174444	346	982	829	1061	804.5	Cytoplasm	enzyme
RPL41	ribosomal protein L41	ENSG00000229117	2184	2970	2734	4447	3083.75	Cytoplasm	other
RPL41P1	ribosomal protein L41 pseudogene 1 [Source:HGNC Symbol	ENSG00000227063	101	94	104	136	108.75
RPL41P5	ribosomal protein L41 pseudogene 5 [Source:HGNC Symbol	ENSG00000256393	51	78	62	74	66.25
RPL5	ribosomal protein L5	ENSG00000122406	181	210	424	338	288.25	Cytoplasm	other
RPL6	ribosomal protein L6	ENSG00000089009	123	269	260	275	231.75	Nucleus	other
RPL7	ribosomal protein L7	ENSG00000147604	2774	4585	4531	5810	4425	Nucleus	transcription regulator
RPL7A	ribosomal protein L7a	ENSG00000148303	279	399	685	593	489	Cytoplasm	other
RPL7L1	ribosomal protein L7 like 1	ENSG00000146223	17	118	70	163	92	Cytoplasm	transcription regulator
RPL7P9	ribosomal protein L7 pseudogene 9 [Source:HGNC Symbol	ENSG00000137970	44	22	52	42	40
RPL8	ribosomal protein L8	ENSG00000161016	268	244	589	334	358.75	Other	other
RPL9	ribosomal protein L9	ENSG00000163682	163	312	621	1015	527.75	Nucleus	other
RPL9P9	ribosomal protein L9 pseudogene 9 [Source:HGNC Symbol	ENSG00000237550	32	10	50	47	34.75
RPLP0	ribosomal protein lateral stalk subunit P0	ENSG00000089157	126	127	114	356	180.75	Cytoplasm	other
RPLP1	ribosomal protein lateral stalk subunit P1	ENSG00000137818	3158	2099	2933	4230	3105	Cytoplasm	other
RPLP2	ribosomal protein lateral stalk subunit P2	ENSG00000177600	1287	1588	2784	2364	2005.75	Cytoplasm	other
RPS11	ribosomal protein S11	ENSG00000142534	4876	5358	5665	7030	5732.25	Cytoplasm	other
RPS12	ribosomal protein S12	ENSG00000112306	15360	17372	15229	26033	18498.5	Cytoplasm	other
RPS13	ribosomal protein S13	ENSG00000110700	1415	1776	2080	1856	1781.75	Cytoplasm	other
RPS14	ribosomal protein S14	ENSG00000164587	3551	5044	6251	7476	5580.5	Cytoplasm	translation regulator
RPS15	ribosomal protein S15	ENSG00000115268	358	104	1141	365	492	Cytoplasm	other
RPS15A	ribosomal protein S15a	ENSG00000134419	700	774	1052	1055	895.25	Cytoplasm	other
RPS16	ribosomal protein S16	ENSG00000105193	39	44	128	120	82.75	Cytoplasm	other
RPS17	ribosomal protein S17	ENSG00000182774	455	464	462	508	472.25	Cytoplasm	other
RPS18	ribosomal protein S18	ENSG00000231500	355	599	643	943	635	Cytoplasm	other
RPS19	ribosomal protein S19	ENSG00000105372	505	186	268	482	360.25	Cytoplasm	other
RPS2	ribosomal protein S2	ENSG00000140988	148	250	293	366	264.25	Cytoplasm	other
RPS20	ribosomal protein S20	ENSG00000008988	592	607	835	1108	785.5	Cytoplasm	other
RPS23	ribosomal protein S23	ENSG00000186468	7	7	32	28	18.5	Cytoplasm	translation regulator
RPS24	ribosomal protein S24	ENSG00000138326	896	1313	1214	1752	1293.75	Cytoplasm	other
RPS25	ribosomal protein S25	ENSG00000118181	1066	1508	2490	2617	1920.25	Cytoplasm	other
RPS27	ribosomal protein S27	ENSG00000177954	510	777	922	1593	950.5	Cytoplasm	other
RPS27A	ribosomal protein S27a	ENSG00000143947	194	254	562	701	427.75	Cytoplasm	other
RPS28	ribosomal protein S28	ENSG00000233927	48	32	82	98	65	Cytoplasm	other
RPS29	ribosomal protein S29	ENSG00000213741	167	199	388	413	291.75	Cytoplasm	other
RPS2P5	ribosomal protein S2 pseudogene 5 [Source:HGNC Symbol	ENSG00000240342	11	35	18	15	19.75
RPS3	ribosomal protein S3	ENSG00000149273	541	898	1725	2172	1334	Cytoplasm	enzyme
RPS3A	ribosomal protein S3A	ENSG00000145425	343	573	737	893	636.5	Nucleus	other
RPS4X	ribosomal protein S4, X-linked	ENSG00000198034	600	686	759	1059	776	Cytoplasm	other
RPS5	ribosomal protein S5	ENSG00000083845	232	342	489	631	423.5	Cytoplasm	other
RPS6	ribosomal protein S6	ENSG00000137154	658	1312	1454	2106	1382.5	Cytoplasm	other
RPS6KB1	ribosomal protein S6 kinase B1	ENSG00000108443	13	6	26	47	23	Cytoplasm	kinase
RPS7	ribosomal protein S7	ENSG00000171863	92	90	214	177	143.25	Cytoplasm	other
RPS8	ribosomal protein S8	ENSG00000142937	261	279	339	443	330.5	Cytoplasm	other
RPS9	ribosomal protein S9	ENSG00000170889	135	315	506	528	371	Cytoplasm	translation regulator
RPSA	ribosomal protein SA	ENSG00000168028	63	151	82	143	109.75	Cytoplasm	translation regulator
RRP15	ribosomal RNA processing 15 homolog	ENSG00000067533	11	30	41	36	29.5	Nucleus	other
RSAD2	radical S-adenosyl methionine domain containing 2	ENSG00000134321	100	242	69	158	142.25	Cytoplasm	enzyme
RSBN1L	round spermatid basic protein 1 like	ENSG00000187257	158	380	163	391	273	Other	other
RSF1	remodeling and spacing factor 1	ENSG00000048649	675	1676	925	1872	1287	Nucleus	transcription regulator
RSRC1	arginine and serine rich coiled-coil 1	ENSG00000174891	347	591	184	588	427.5	Nucleus	other
RSRC2	arginine and serine rich coiled-coil 2	ENSG00000111011	114	385	72	296	216.75	Other	other
RSRP1	arginine and serine rich protein 1	ENSG00000117616	6	12	13	30	15.25	Other	other
RSU1	Ras suppressor protein 1	ENSG00000148484	1211	1178	1088	704	1045.25	Cytoplasm	other
RTCA-AS1	RTCA antisense RNA 1 [Source:HGNC Symbol	ENSG00000224616	62	161	71	218	128
RTF1	RTF1 homolog, Paf1/RNA polymerase II complex component	ENSG00000137815	32	143	55	123	88.25	Nucleus	other
RTFDC1	replication termination factor 2 domain containing 1	ENSG00000022277	17	68	141	12	59.5	Other	other
RUFY1	RUN and FYVE domain containing 1	ENSG00000176783	16	49	12	32	27.25	Cytoplasm	transporter
RUFY2	RUN and FYVE domain containing 2	ENSG00000204130	75	195	118	331	179.75	Nucleus	other
RUNDC3A	RUN domain containing 3A	ENSG00000108309	163	35	535	252	246.25	Cytoplasm	other
RWDD1	RWD domain containing 1	ENSG00000111832	48	48	47	106	62.25	Other	other
RWDD4	RWD domain containing 4	ENSG00000182552	18	11	10	72	27.75	Other	other
RXRA	retinoid X receptor alpha	ENSG00000186350	210	70	228	302	202.5	Nucleus	ligand-dependent nuclear receptor
RYBP	RING1 and YY1 binding protein	ENSG00000163602	28	45	5	21	24.75	Nucleus	transcription regulator
SAFB	scaffold attachment factor B	ENSG00000160633	5	5	28	51	22.25	Nucleus	other
SAFB2	scaffold attachment factor B2	ENSG00000130254	63	124	36	213	109	Cytoplasm	other
SAMD9	sterile alpha motif domain containing 9	ENSG00000205413	753	1154	543	1436	971.5	Cytoplasm	other
SAP18	Sin3A associated protein 18	ENSG00000150459	334	614	403	377	432	Nucleus	transcription regulator
SAP30BP	SAP30 binding protein	ENSG00000161526	6	29	18	38	22.75	Nucleus	transcription regulator
SARS	seryl-tRNA synthetase	ENSG00000031698	127	363	349	240	269.75	Cytoplasm	enzyme
SASS6	SAS-6 centriolar assembly protein	ENSG00000156876	28	95	36	80	59.75	Cytoplasm	other
SAT1	spermidine/spermine N1-acetyltransferase 1	ENSG00000130066	12	15	5	42	18.5	Cytoplasm	enzyme
SATB1	SATB homeobox 1	ENSG00000182568	6	6	17	28	14.25	Nucleus	transcription regulator
SBDS	SBDS ribosome assembly guanine nucleotide exchange factor	ENSG00000126524	74	168	48	158	112	Nucleus	other
SBNO1	strawberry notch homolog 1	ENSG00000139697	130	203	57	147	134.25	Other	enzyme
SCAF11	SR-related CTD associated factor 11	ENSG00000139218	124	412	285	498	329.75	Nucleus	other
SCAF8	SR-related CTD associated factor 8	ENSG00000213079	39	37	37	38	37.75	Nucleus	other
SCFD1	sec1 family domain containing 1	ENSG00000092108	155	244	42	182	155.75	Cytoplasm	transporter
SCLT1	sodium channel and clathrin linker 1	ENSG00000151466	2015	4152	1463	3927	2889.25	Plasma Membrane	transporter
SCNM1	sodium channel modifier 1	ENSG00000163156	8	25	21	20	18.5	Nucleus	other
SDCBP	syndecan binding protein	ENSG00000137575	58	10	13	167	62	Plasma Membrane	enzyme
SDCCAG8	serologically defined colon cancer antigen 8	ENSG00000054282	76	201	24	140	110.25	Cytoplasm	other
SDHB	succinate dehydrogenase complex iron sulfur subunit B	ENSG00000117118	40	40	138	103	80.25	Cytoplasm	enzyme
SDSL	serine dehydratase like	ENSG00000139410	13	5	48	21	21.75	Cytoplasm	enzyme
SEC13	SEC13 homolog, nuclear pore and COPII coat complex component	ENSG00000157020	26	40	34	23	30.75	Cytoplasm	transporter
SEC14L1	SEC14 like lipid binding 1	ENSG00000129657	328	332	530	694	471	Cytoplasm	transporter
SEC14L3	SEC14 like lipid binding 3	ENSG00000100012	199	452	534	817	500.5	Extracellular Space	transporter
SEC31A	SEC31 homolog A, COPII coat complex component	ENSG00000138674	66	28	22	24	35	Cytoplasm	other
SEC62	SEC62 homolog, preprotein translocation factor	ENSG00000008952	6569	7575	4136	12696	7744	Cytoplasm	transporter
SEC63	SEC63 homolog, protein translocation regulator	ENSG00000025796	19	153	44	83	74.75	Cytoplasm	transporter
SECISBP2	SECIS binding protein 2	ENSG00000187742	272	192	302	729	373.75	Cytoplasm	translation regulator
SECISBP2L	SECIS binding protein 2 like	ENSG00000138593	47	31	20	58	39	Other	other
SELENBP1	selenium binding protein 1	ENSG00000143416	5560	6668	11275	7958	7865.25	Cytoplasm	other
SELK	selenoprotein K	ENSG00000113811	5988	5676	4302	3256	4805.5	Cytoplasm	other
SENP6	SUMO1/sentrin specific peptidase 6	ENSG00000112701	192	506	227	718	410.75	Cytoplasm	peptidase
SENP7	SUMO1/sentrin specific peptidase 7	ENSG00000138468	31	42	14	79	41.5	Nucleus	peptidase
SEPSECS-AS1	SEPSECS antisense RNA 1 (head to head) [Source:HGNC Symbol	ENSG00000281501	16	8	12	12	12
SEPT7	septin 7	ENSG00000122545	86	224	127	305	185.5	Cytoplasm	other
SEPT7P2	septin 7 pseudogene 2 [Source:HGNC Symbol	ENSG00000214765	5	85	10	65	41.25
SERBP1	SERPINE1 mRNA binding protein 1	ENSG00000142864	51	14	67	74	51.5	Cytoplasm	other
SERF2	small EDRK-rich factor 2	ENSG00000140264	23600	35844	44413	49746	38400.8	Other	other
SERINC1	serine incorporator 1	ENSG00000111897	113	109	86	199	126.75	Plasma Membrane	transporter
SERINC3	serine incorporator 3	ENSG00000132824	407	543	332	807	522.25	Cytoplasm	transporter
SESN3	sestrin 3	ENSG00000149212	237	563	377	1135	578	Extracellular Space	other
SET	SET nuclear proto-oncogene	ENSG00000119335	55	86	17	79	59.25	Nucleus	phosphatase
SETD2	SET domain containing 2	ENSG00000181555	192	322	304	361	294.75	Cytoplasm	enzyme
SETD3	SET domain containing 3	ENSG00000183576	5	31	27	79	35.5	Nucleus	enzyme
SETDB2	SET domain bifurcated 2	ENSG00000136169	15	33	21	28	24.25	Nucleus	enzyme
SF3B3	splicing factor 3b subunit 3	ENSG00000189091	16	155	53	44	67	Nucleus	other
SF3B5	splicing factor 3b subunit 5	ENSG00000169976	72	122	190	162	136.5	Nucleus	other
SF3B6	splicing factor 3b subunit 6	ENSG00000115128	44	60	61	28	48.25	Nucleus	other
SFRP2	secreted frizzled related protein 2	ENSG00000145423	13	9	6	6	8.5	Plasma Membrane	transmembrane receptor
SGIP1	SH3 domain GRB2 like endophilin interacting protein 1	ENSG00000118473	90	81	40	181	98	Cytoplasm	other
SGMS1	sphingomyelin synthase 1	ENSG00000198964	17	76	9	81	45.75	Cytoplasm	enzyme
SGO1	shugoshin 1	ENSG00000129810	44	95	37	150	81.5	Nucleus	other
SGO2	shugoshin 2	ENSG00000163535	20	48	65	9	35.5	Nucleus	other
SH3BGRL	SH3 domain binding glutamate rich protein like	ENSG00000131171	593	861	714	1265	858.25	Cytoplasm	other
SH3BGRL3	SH3 domain binding glutamate rich protein like 3	ENSG00000142669	860	837	5815	829	2085.25	Nucleus	other
SH3GLB1	SH3 domain containing GRB2 like endophilin B1	ENSG00000097033	125	263	159	174	180.25	Cytoplasm	enzyme
SHARPIN	SHANK associated RH domain interactor	ENSG00000179526	125	96	641	368	307.5	Plasma Membrane	other
SHISA4	shisa family member 4 [Source:HGNC Symbol	ENSG00000198892	12	86	109	40	61.75
SHISA5	shisa family member 5	ENSG00000164054	34	116	301	269	180	Nucleus	other
SHOC2	SHOC2, leucine rich repeat scaffold protein	ENSG00000108061	295	319	151	549	328.5	Cytoplasm	other
SIAH2	siah E3 ubiquitin protein ligase 2	ENSG00000181788	163	101	102	183	137.25	Nucleus	transcription regulator
SIRT1	sirtuin 1	ENSG00000096717	18	44	30	29	30.25	Nucleus	transcription regulator
SIRT2	sirtuin 2	ENSG00000068903	32	36	113	99	70	Nucleus	transcription regulator
SIRT5	sirtuin 5	ENSG00000124523	38	67	16	44	41.25	Cytoplasm	enzyme
SKA3	spindle and kinetochore associated complex subunit 3	ENSG00000165480	497	1561	458	905	855.25	Nucleus	other
SKP1	S-phase kinase-associated protein 1	ENSG00000113558	1962	1987	3751	4432	3033	Nucleus	transcription regulator
SLAIN2	SLAIN motif family member 2	ENSG00000109171	186	436	166	484	318	Cytoplasm	other
SLC14A1	solute carrier family 14 member 1 (Kidd blood group)	ENSG00000141469	2565	2177	2656	3297	2673.75	Plasma Membrane	transporter
SLC1A5	solute carrier family 1 member 5	ENSG00000105281	300	181	296	428	301.25	Plasma Membrane	transporter
SLC25A37	solute carrier family 25 member 37	ENSG00000147454	8354	6156	7384	11253	8286.75	Cytoplasm	transporter
SLC25A38	solute carrier family 25 member 38	ENSG00000144659	439	904	749	965	764.25	Cytoplasm	other
SLC25A39	solute carrier family 25 member 39	ENSG00000013306	17001	7874	50603	22042	24380	Cytoplasm	other
SLC25A51	solute carrier family 25 member 51	ENSG00000122696	27	71	181	132	102.75	Cytoplasm	other
SLC25A53	solute carrier family 25 member 53 [Source:HGNC Symbol	ENSG00000269743	48	61	99	104	78
SLC25A6	solute carrier family 25 member 6	ENSG00000169100	81	24	142	68	78.75	Cytoplasm	transporter
SLC2A1	solute carrier family 2 member 1	ENSG00000117394	47	30	173	89	84.75	Plasma Membrane	transporter
SLC2A1-AS1	SLC2A1 antisense RNA 1 [Source:HGNC Symbol	ENSG00000227533	20	87	144	217	117
SLC30A9	solute carrier family 30 member 9	ENSG00000014824	15	24	8	19	16.5	Nucleus	transporter
SLC33A1	solute carrier family 33 member 1	ENSG00000169359	13	53	6	32	26	Cytoplasm	transporter
SLC38A5	solute carrier family 38 member 5	ENSG00000017483	1532	4173	3564	5203	3618	Plasma Membrane	transporter
SLC39A8	solute carrier family 39 member 8	ENSG00000138821	12	6	12	8	9.5	Extracellular Space	transporter
SLC40A1	solute carrier family 40 member 1	ENSG00000138449	278	205	39	248	192.5	Plasma Membrane	transporter
SLC43A1	solute carrier family 43 member 1	ENSG00000149150	57	21	81	93	63	Plasma Membrane	transporter
SLC44A2	solute carrier family 44 member 2	ENSG00000129353	29	14	53	76	43	Extracellular Space	transporter
SLC48A1	solute carrier family 48 member 1	ENSG00000211584	204	223	267	185	219.75	Other	other
SLC4A1	solute carrier family 4 member 1 (Diego blood group)	ENSG00000004939	2321	1697	7070	5522	4152.5	Plasma Membrane	transporter
SLC6A8	solute carrier family 6 member 8	ENSG00000130821	207	145	341	403	274	Cytoplasm	transporter
SLC7A5	solute carrier family 7 member 5	ENSG00000103257	5	9	14	21	12.25	Plasma Membrane	transporter
SLF1	SMC5-SMC6 complex localization factor 1	ENSG00000133302	1436	3573	1550	4453	2753	Nucleus	transcription regulator
SLF2	SMC5-SMC6 complex localization factor 2	ENSG00000119906	67	73	27	207	93.5	Extracellular Space	other
SLFN14	schlafen family member 14	ENSG00000236320	63	299	90	251	175.75	Nucleus	enzyme
SLK	STE20 like kinase	ENSG00000065613	82	247	147	148	156	Nucleus	kinase
SLMAP	sarcolemma associated protein	ENSG00000163681	29	207	62	158	114	Plasma Membrane	other
SLTM	SAFB like transcription modulator	ENSG00000137776	1748	3332	1837	4382	2824.75	Nucleus	other
SLU7	SLU7 homolog, splicing factor	ENSG00000164609	242	159	106	530	259.25	Nucleus	enzyme
SMARCA5	SWI/SNF related, matrix associated, actin dependent regulator of chromatin, subfamily a, member 5	ENSG00000153147	669	1216	482	1327	923.5	Nucleus	transcription regulator
SMARCC1	SWI/SNF related, matrix associated, actin dependent regulator of chromatin subfamily c member 1	ENSG00000173473	90	149	55	247	135.25	Nucleus	transcription regulator
SMARCC2	SWI/SNF related, matrix associated, actin dependent regulator of chromatin subfamily c member 2	ENSG00000139613	21	9	30	35	23.75	Nucleus	transcription regulator
SMC1A	structural maintenance of chromosomes 1A	ENSG00000072501	296	554	88	357	323.75	Nucleus	transporter
SMC1B	structural maintenance of chromosomes 1B	ENSG00000077935	11	59	5	62	34.25	Nucleus	transporter
SMC2	structural maintenance of chromosomes 2	ENSG00000136824	9	62	33	98	50.5	Nucleus	transporter
SMC3	structural maintenance of chromosomes 3	ENSG00000108055	63	110	119	101	98.25	Nucleus	other
SMC4	structural maintenance of chromosomes 4	ENSG00000113810	1225	2439	980	2378	1755.5	Nucleus	transporter
SMC5	structural maintenance of chromosomes 5	ENSG00000198887	13	44	26	51	33.5	Nucleus	other
SMC6	structural maintenance of chromosomes 6	ENSG00000163029	47	248	115	311	180.25	Nucleus	other
SMCHD1	structural maintenance of chromosomes flexible hinge domain containing 1	ENSG00000101596	38	152	32	40	65.5	Nucleus	other
SMDT1	single-pass membrane protein with aspartate rich tail 1	ENSG00000183172	25	14	109	46	48.5	Extracellular Space	other
SMG1P3	SMG1P3, nonsense mediated mRNA decay associated PI3K related kinase pseudogene 3 [Source:HGNC Symbol	ENSG00000180747	10	42	30	88	42.5
SMG7	SMG7, nonsense mediated mRNA decay factor	ENSG00000116698	49	66	89	77	70.25	Nucleus	other
SMIM24	small integral membrane protein 24 [Source:HGNC Symbol	ENSG00000095932	1643	1382	1277	1455	1439.25
SMIM5	small integral membrane protein 5 [Source:HGNC Symbol	ENSG00000204323	28	20	108	30	46.5
SMOX	spermine oxidase	ENSG00000088826	273	418	2230	666	896.75	Cytoplasm	enzyme
SNCA	synuclein alpha	ENSG00000145335	3413	4829	2898	3376	3629	Cytoplasm	enzyme
SND1	staphylococcal nuclease and tudor domain containing 1	ENSG00000197157	16	5	57	68	36.5	Nucleus	enzyme
SNHG10	small nucleolar RNA host gene 10 [Source:HGNC Symbol	ENSG00000247092	9	25	12	20	16.5
SNHG8	small nucleolar RNA host gene 8 [Source:HGNC Symbol	ENSG00000269893	15	15	28	41	24.75
SNRNP27	small nuclear ribonucleoprotein U4/U6.U5 subunit 27	ENSG00000124380	22	13	15	12	15.5	Nucleus	other
SNRNP48	small nuclear ribonucleoprotein U11/U12 subunit 48	ENSG00000168566	69	167	131	250	154.25	Nucleus	other
SNRPD2	small nuclear ribonucleoprotein D2 polypeptide	ENSG00000125743	43	23	78	21	41.25	Nucleus	other
SNRPD3	small nuclear ribonucleoprotein D3 polypeptide	ENSG00000100028	11	32	17	10	17.5	Nucleus	other
SNU13	SNU13 homolog, small nuclear ribonucleoprotein (U4/U6.U5)	ENSG00000100138	111	30	59	34	58.5	Nucleus	other
SNW1	SNW domain containing 1	ENSG00000100603	12	26	5	24	16.75	Nucleus	transcription regulator
SNX13	sorting nexin 13	ENSG00000071189	22	9	9	9	12.25	Cytoplasm	transporter
SNX2	sorting nexin 2	ENSG00000205302	83	174	8	112	94.25	Cytoplasm	transporter
SNX22	sorting nexin 22	ENSG00000157734	18	5	78	18	29.75	Other	transporter
SNX29	sorting nexin 29	ENSG00000048471	104	43	174	117	109.5	Cytoplasm	other
SNX3	sorting nexin 3	ENSG00000112335	126	108	73	143	112.5	Cytoplasm	transporter
SNX6	sorting nexin 6	ENSG00000129515	28	34	9	96	41.75	Cytoplasm	transporter
SOD1	superoxide dismutase 1, soluble	ENSG00000142168	147	109	86	225	141.75	Cytoplasm	enzyme
SOD2	superoxide dismutase 2 [Source:HGNC Symbol	ENSG00000112096	7	11	17	23	14.5
SON	SON DNA binding protein	ENSG00000159140	73	61	12	44	47.5	Nucleus	other
SOS2	SOS Ras/Rho guanine nucleotide exchange factor 2	ENSG00000100485	23	55	22	16	29	Cytoplasm	other
SOX6	SRY-box 6	ENSG00000110693	600	1403	690	1805	1124.5	Nucleus	transcription regulator
SP100	SP100 nuclear antigen	ENSG00000067066	694	1300	688	757	859.75	Nucleus	transcription regulator
SP2	Sp2 transcription factor	ENSG00000167182	21	8	27	87	35.75	Nucleus	transcription regulator
SPAG16	sperm associated antigen 16	ENSG00000144451	11	50	8	39	27	Cytoplasm	other
SPAST	spastin	ENSG00000021574	18	129	22	114	70.75	Nucleus	enzyme
SPC25	SPC25, NDC80 kinetochore complex component	ENSG00000152253	27	30	27	43	31.75	Cytoplasm	other
SPDL1	spindle apparatus coiled-coil protein 1	ENSG00000040275	27	29	10	9	18.75	Nucleus	other
SPECC1	sperm antigen with calponin homology and coiled-coil domains 1	ENSG00000128487	2236	3205	1875	3754	2767.5	Nucleus	other
SPG11	spastic paraplegia 11 (autosomal recessive)	ENSG00000104133	11	12	21	41	21.25	Cytoplasm	other
SPIDR	scaffolding protein involved in DNA repair	ENSG00000164808	27	48	9	18	25.5	Nucleus	other
SPOP	speckle type BTB/POZ protein	ENSG00000121067	444	652	349	675	530	Extracellular Space	other
SPTA1	spectrin alpha, erythrocytic 1	ENSG00000163554	79	133	60	76	87	Cytoplasm	other
SPTB	spectrin beta, erythrocytic	ENSG00000070182	42	16	60	32	37.5	Plasma Membrane	other
SQRDL	sulfide quinone reductase-like (yeast)	ENSG00000137767	12	5	39	23	19.75	Cytoplasm	enzyme
SREK1	splicing regulatory glutamic acid and lysine rich protein 1	ENSG00000153914	94	89	64	180	106.75	Nucleus	other
SREK1IP1	SREK1 interacting protein 1	ENSG00000153006	74	112	68	192	111.5	Other	other
SRFBP1	serum response factor binding protein 1	ENSG00000151304	56	124	115	150	111.25	Nucleus	other
SRP54-AS1	SRP54 antisense RNA 1 (head to head) [Source:HGNC Symbol	ENSG00000258704	11	18	22	16	16.75
SRP72	signal recognition particle 72	ENSG00000174780	133	70	96	331	157.5	Nucleus	kinase
SRPK1	SRSF protein kinase 1	ENSG00000096063	77	48	9	33	41.75	Nucleus	kinase
SRPK2	SRSF protein kinase 2	ENSG00000135250	8	12	12	9	10.25	Nucleus	kinase
SRRD	SRR1 domain containing	ENSG00000100104	42	126	71	67	76.5	Other	other
SRRM1	serine and arginine repetitive matrix 1	ENSG00000133226	17	55	44	42	39.5	Nucleus	other
SRSF11	serine and arginine rich splicing factor 11	ENSG00000116754	6	33	12	77	32	Nucleus	other
SRSF8	serine and arginine rich splicing factor 8	ENSG00000263465	33	80	109	166	97	Nucleus	other
SSB	Sjogren syndrome antigen B	ENSG00000138385	63	68	48	124	75.75	Nucleus	enzyme
SSBP3	single stranded DNA binding protein 3	ENSG00000157216	21	42	95	126	71	Nucleus	transcription regulator
SSH2	slingshot protein phosphatase 2	ENSG00000141298	19	24	23	20	21.5	Cytoplasm	phosphatase
SSNA1	SS nuclear autoantigen 1	ENSG00000176101	5	5	49	62	30.25	Cytoplasm	other
SSR4	signal sequence receptor subunit 4	ENSG00000180879	58	44	129	130	90.25	Cytoplasm	other
ST13	suppression of tumorigenicity 13 (colon carcinoma) (Hsp70 interacting protein)	ENSG00000100380	3354	4409	3058	4867	3922	Cytoplasm	other
ST13P6	suppression of tumorigenicity 13 (colon carcinoma) (Hsp70 interacting protein) pseudogene 6 [Source:HGNC Symbol	ENSG00000225259	21	19	5	11	14
ST3GAL1	ST3 beta-galactoside alpha-2,3-sialyltransferase 1	ENSG00000008513	904	954	1403	2394	1413.75	Cytoplasm	enzyme
ST6GALNAC4	ST6 N-acetylgalactosaminide alpha-2,6-sialyltransferase 4	ENSG00000136840	295	89	235	155	193.5	Cytoplasm	enzyme
ST7L	suppression of tumorigenicity 7 like	ENSG00000007341	5	10	5	23	10.75	Other	other
ST8SIA1	ST8 alpha-N-acetyl-neuraminide alpha-2,8-sialyltransferase 1	ENSG00000111728	53	186	150	21	102.5	Cytoplasm	enzyme
STAG1	stromal antigen 1	ENSG00000118007	28	34	13	20	23.75	Nucleus	transcription regulator
STAG2	stromal antigen 2	ENSG00000101972	132	377	91	442	260.5	Nucleus	transcription regulator
STAM	signal transducing adaptor molecule	ENSG00000136738	35	27	15	45	30.5	Cytoplasm	other
STAMBP	STAM binding protein	ENSG00000124356	5	5	5	13	7	Nucleus	enzyme
STAT6	signal transducer and activator of transcription 6	ENSG00000166888	270	891	1173	536	717.5	Nucleus	transcription regulator
STAU1	staufen double-stranded RNA binding protein 1	ENSG00000124214	309	186	180	226	225.25	Cytoplasm	transporter
STIL	SCL/TAL1 interrupting locus	ENSG00000123473	65	187	81	197	132.5	Nucleus	other
STK16	serine/threonine kinase 16	ENSG00000115661	22	84	90	164	90	Cytoplasm	kinase
STK17A	serine/threonine kinase 17a	ENSG00000164543	6	38	17	50	27.75	Nucleus	kinase
STK17B	serine/threonine kinase 17b	ENSG00000081320	15	26	16	34	22.75	Nucleus	kinase
STOM	stomatin	ENSG00000148175	456	523	270	647	474	Plasma Membrane	other
STOML2	stomatin like 2	ENSG00000165283	96	98	520	199	228.25	Plasma Membrane	other
STRADB	STE20-related kinase adaptor beta	ENSG00000082146	2074	2021	1767	3188	2262.5	Cytoplasm	kinase
STRAP	serine/threonine kinase receptor associated protein	ENSG00000023734	203	263	166	319	237.75	Plasma Membrane	other
STRN3	striatin 3	ENSG00000196792	471	1340	506	1412	932.25	Nucleus	transcription regulator
STX17	syntaxin 17	ENSG00000136874	85	68	78	171	100.5	Plasma Membrane	transporter
STX18	syntaxin 18	ENSG00000168818	5	9	6	36	14	Cytoplasm	transporter
STX2	syntaxin 2	ENSG00000111450	79	25	34	25	40.75	Cytoplasm	transporter
STX4	syntaxin 4	ENSG00000103496	7	22	20	10	14.75	Plasma Membrane	transporter
STX5	syntaxin 5	ENSG00000162236	57	117	121	195	122.5	Cytoplasm	transporter
STX7	syntaxin 7	ENSG00000079950	229	312	353	425	329.75	Plasma Membrane	transporter
STXBP2	syntaxin binding protein 2	ENSG00000076944	63	7	264	38	93	Plasma Membrane	transporter
SUCO	SUN domain containing ossification factor	ENSG00000094975	387	654	268	961	567.5	Other	other
SUDS3	SDS3 homolog, SIN3A corepressor complex component	ENSG00000111707	207	151	153	250	190.25	Nucleus	enzyme
SUGT1	SGT1 homolog, MIS12 kinetochore complex assembly cochaperone	ENSG00000165416	102	153	219	274	187	Nucleus	other
SUMF2	sulfatase modifying factor 2	ENSG00000129103	45	58	185	25	78.25	Cytoplasm	other
SUPT4H1	SPT4 homolog, DSIF elongation factor subunit	ENSG00000213246	35	85	40	49	52.25	Nucleus	transcription regulator
SUPT5H	SPT5 homolog, DSIF elongation factor subunit	ENSG00000196235	33	9	125	105	68	Nucleus	transcription regulator
SURF1	surfeit 1	ENSG00000148290	8	17	20	14	14.75	Cytoplasm	enzyme
SUZ12	SUZ12 polycomb repressive complex 2 subunit	ENSG00000178691	49	282	83	216	157.5	Nucleus	enzyme
SUZ12P1	SUZ12 polycomb repressive complex 2 subunit pseudogene 1 [Source:HGNC Symbol	ENSG00000264538	47	131	22	94	73.5
SVBP	small vasohibin binding protein	ENSG00000177868	8	22	50	106	46.5	Other	other
SWT1	SWT1, RNA endoribonuclease homolog	ENSG00000116668	306	1243	263	835	661.75	Extracellular Space	other
SYAP1	synapse associated protein 1	ENSG00000169895	27	62	30	16	33.75	Nucleus	other
SYF2	SYF2 pre-mRNA splicing factor	ENSG00000117614	135	313	217	235	225	Nucleus	other
SYNCRIP	synaptotagmin binding cytoplasmic RNA interacting protein	ENSG00000135316	22	61	41	53	44.25	Nucleus	other
SZRD1	SUZ RNA binding domain containing 1	ENSG00000055070	10	55	97	66	57	Other	other
TAB2	TGF-beta activated kinase 1/MAP3K7 binding protein 2	ENSG00000055208	54	104	10	37	51.25	Cytoplasm	other
TADA2A	transcriptional adaptor 2A	ENSG00000276234	30	45	15	56	36.5	Nucleus	transcription regulator
TADA3	transcriptional adaptor 3	ENSG00000171148	138	178	137	254	176.75	Nucleus	transcription regulator
TAF10	TATA-box binding protein associated factor 10	ENSG00000166337	11	15	12	8	11.5	Nucleus	transcription regulator
TAF1D	TATA-box binding protein associated factor, RNA polymerase I subunit D	ENSG00000166012	63	54	15	56	47	Nucleus	other
TAF2	TATA-box binding protein associated factor 2	ENSG00000064313	20	24	18	13	18.75	Nucleus	transcription regulator
TAF3	TATA-box binding protein associated factor 3	ENSG00000165632	13	54	28	11	26.5	Nucleus	transcription regulator
TAF8	TATA-box binding protein associated factor 8	ENSG00000137413	7	6	11	23	11.75	Nucleus	transcription regulator
TAF9	TATA-box binding protein associated factor 9	ENSG00000273841	12	13	35	51	27.75	Nucleus	transcription regulator
TAL1	TAL bHLH transcription factor 1, erythroid differentiation factor	ENSG00000162367	40	67	15	70	48	Nucleus	transcription regulator
TALDO1	transaldolase 1	ENSG00000177156	1606	615	2316	1057	1398.5	Cytoplasm	enzyme
TANGO2	transport and golgi organization 2 homolog	ENSG00000183597	369	332	689	566	489	Cytoplasm	other
TANK	TRAF family member associated NFKB activator	ENSG00000136560	600	385	135	2174	823.5	Cytoplasm	other
TAOK1	TAO kinase 1	ENSG00000160551	86	119	97	109	102.75	Cytoplasm	kinase
TARS	threonyl-tRNA synthetase	ENSG00000113407	129	142	52	128	112.75	Nucleus	enzyme
TATDN1	TatD DNase domain containing 1	ENSG00000147687	9	6	6	82	25.75	Extracellular Space	other
TAX1BP1	Tax1 binding protein 1	ENSG00000106052	2644	3009	1566	4887	3026.5	Cytoplasm	other
TBC1D15	TBC1 domain family member 15	ENSG00000121749	41	43	31	40	38.75	Cytoplasm	other
TBC1D22B	TBC1 domain family member 22B	ENSG00000065491	862	1001	1499	1612	1243.5	Other	other
TBC1D23	TBC1 domain family member 23	ENSG00000036054	42	64	47	42	48.75	Other	other
TBC1D25	TBC1 domain family member 25	ENSG00000068354	17	35	44	96	48	Other	other
TBC1D31	TBC1 domain family member 31	ENSG00000156787	23	77	13	50	40.75	Cytoplasm	other
TBCEL	tubulin folding cofactor E like	ENSG00000154114	575	1520	511	1542	1037	Other	other
TBL1XR1	transducin (beta)-like 1 X-linked receptor 1	ENSG00000177565	60	83	31	113	71.75	Nucleus	transcription regulator
TBPL1	TATA-box binding protein like 1	ENSG00000028839	336	233	105	437	277.75	Nucleus	transcription regulator
TCEA1	transcription elongation factor A1	ENSG00000187735	361	744	329	669	525.75	Nucleus	transcription regulator
TCEA1P2	transcription elongation factor A1 pseudogene 2 [Source:HGNC Symbol	ENSG00000230409	9	41	14	27	22.75
TCEANC	transcription elongation factor A N-terminal and central domain containing	ENSG00000176896	161	130	206	217	178.5	Other	other
TCEB2	transcription elongation factor B subunit 2	ENSG00000103363	3816	2548	6799	4637	4450	Nucleus	transcription regulator
TCP11L2	t-complex 11 like 2	ENSG00000166046	1859	2948	1340	2710	2214.25	Other	other
TDG	thymine DNA glycosylase	ENSG00000139372	40	67	32	61	50	Nucleus	enzyme
TDRD3	tudor domain containing 3	ENSG00000083544	7	40	18	87	38	Nucleus	transcription regulator
TERF1	telomeric repeat binding factor 1	ENSG00000147601	8	17	16	65	26.5	Nucleus	other
TERF2	telomeric repeat binding factor 2	ENSG00000132604	12	27	5	37	20.25	Nucleus	other
TERF2IP	TERF2 interacting protein	ENSG00000166848	45	31	31	92	49.75	Nucleus	other
TESC	tescalcin	ENSG00000088992	209	328	624	617	444.5	Cytoplasm	other
TESPA1	thymocyte expressed, positive selection associated 1	ENSG00000135426	8	93	68	185	88.5	Cytoplasm	other
TET2	tet methylcytosine dioxygenase 2	ENSG00000168769	236	850	476	901	615.75	Nucleus	other
TET3	tet methylcytosine dioxygenase 3	ENSG00000187605	18	11	15	12	14	Nucleus	other
TEX2	testis expressed 2	ENSG00000136478	30	85	47	140	75.5	Other	other
TEX9	testis expressed 9	ENSG00000151575	114	150	49	160	118.25	Other	other
TFDP1	transcription factor Dp-1	ENSG00000198176	49	20	9	43	30.25	Nucleus	transcription regulator
TFDP2	transcription factor Dp-2	ENSG00000114126	669	1144	785	2190	1197	Nucleus	transcription regulator
TFRC	transferrin receptor	ENSG00000072274	73	137	121	305	159	Plasma Membrane	transporter
TGM2	transglutaminase 2	ENSG00000198959	115	13	563	141	208	Cytoplasm	enzyme
TGS1	trimethylguanosine synthase 1	ENSG00000137574	130	222	71	135	139.5	Nucleus	enzyme
THEGL	theg spermatid protein-like [Source:HGNC Symbol	ENSG00000249693	6	78	10	5	24.75
THOC2	THO complex 2	ENSG00000125676	148	204	130	209	172.75	Nucleus	other
THOC7	THO complex 7	ENSG00000163634	83	40	34	164	80.25	Nucleus	other
THRAP3	thyroid hormone receptor associated protein 3	ENSG00000054118	342	445	412	985	546	Nucleus	transcription regulator
TIMM17B	translocase of inner mitochondrial membrane 17 homolog B (yeast)	ENSG00000126768	84	55	189	52	95	Cytoplasm	transporter
TIMM23	translocase of inner mitochondrial membrane 23	ENSG00000265354	84	50	119	93	86.5	Cytoplasm	transporter
TKFC	triokinase and FMN cyclase	ENSG00000149476	25	57	33	24	34.75	Cytoplasm	kinase
TKT	transketolase	ENSG00000163931	50	36	110	27	55.75	Cytoplasm	enzyme
TLE4	transducin like enhancer of split 4	ENSG00000106829	7	7	13	23	12.5	Nucleus	transcription regulator
TLK1	tousled like kinase 1	ENSG00000198586	82	170	72	143	116.75	Nucleus	kinase
TLK2	tousled like kinase 2	ENSG00000146872	113	191	124	252	170	Cytoplasm	kinase
TLK2P1	tousled like kinase 2 pseudogene 1 [Source:HGNC Symbol	ENSG00000226049	6	7	11	17	10.25
TM9SF3	transmembrane 9 superfamily member 3	ENSG00000077147	28	22	5	14	17.25	Cytoplasm	transporter
TMA7	translation machinery associated 7 homolog [Source:HGNC Symbol	ENSG00000232112	237	415	330	304	321.5
TMBIM1	transmembrane BAX inhibitor motif containing 1	ENSG00000135926	279	447	837	608	542.75	Cytoplasm	other
TMBIM6	transmembrane BAX inhibitor motif containing 6	ENSG00000139644	114	299	114	404	232.75	Nucleus	other
TMC5	transmembrane channel like 5	ENSG00000103534	111	176	207	239	183.25	Cytoplasm	other
TMCC2	transmembrane and coiled-coil domain family 2	ENSG00000133069	50	41	121	109	80.25	Extracellular Space	other
TMED1	transmembrane p24 trafficking protein 1	ENSG00000099203	8	10	48	52	29.5	Extracellular Space	transporter
TMED10	transmembrane p24 trafficking protein 10	ENSG00000170348	45	14	37	72	42	Cytoplasm	transporter
TMED2	transmembrane p24 trafficking protein 2	ENSG00000086598	38	89	25	43	48.75	Cytoplasm	transporter
TMEM11	transmembrane protein 11	ENSG00000178307	147	112	287	243	197.25	Plasma Membrane	G-protein coupled receptor
TMEM138	transmembrane protein 138	ENSG00000149483	5	8	14	18	11.25	Extracellular Space	other
TMEM14B	transmembrane protein 14B	ENSG00000137210	58	85	83	74	75	Other	other
TMEM161B	transmembrane protein 161B	ENSG00000164180	7	17	7	6	9.25	Other	other
TMEM183A	transmembrane protein 183A	ENSG00000163444	52	8	28	32	30	Other	other
TMEM230	transmembrane protein 230	ENSG00000089063	77	6	38	29	37.5	Other	other
TMEM56	transmembrane protein 56 [Source:HGNC Symbol	ENSG00000152078	22	50	17	28	29.25
TMEM57	transmembrane protein 57	ENSG00000204178	100	130	102	268	150	Nucleus	other
TMEM59	transmembrane protein 59	ENSG00000116209	181	239	147	215	195.5	Plasma Membrane	peptidase
TMEM63A	transmembrane protein 63A	ENSG00000196187	31	13	15	8	16.75	Cytoplasm	other
TMEM63B	transmembrane protein 63B	ENSG00000137216	249	144	229	136	189.5	Plasma Membrane	other
TMEM9	transmembrane protein 9	ENSG00000116857	16	31	64	12	30.75	Cytoplasm	other
TMF1	TATA element modulatory factor 1	ENSG00000144747	80	264	167	357	217	Cytoplasm	transcription regulator
TMOD1	tropomodulin 1	ENSG00000136842	77	126	99	101	100.75	Cytoplasm	enzyme
TMOD3	tropomodulin 3	ENSG00000138594	5	7	27	15	13.5	Cytoplasm	other
TMPRSS5	transmembrane protease, serine 5	ENSG00000166682	6	10	11	6	8.25	Plasma Membrane	peptidase
TMUB2	transmembrane and ubiquitin like domain containing 2	ENSG00000168591	49	134	98	328	152.25	Other	other
TNIP1	TNFAIP3 interacting protein 1	ENSG00000145901	295	159	694	704	463	Nucleus	other
TNPO1	transportin 1	ENSG00000083312	40	62	6	76	46	Nucleus	transporter
TNRC6A	trinucleotide repeat containing 6A	ENSG00000090905	618	1327	593	1186	931	Nucleus	other
TNRC6B	trinucleotide repeat containing 6B	ENSG00000100354	204	278	280	299	265.25	Other	other
TNRC6C	trinucleotide repeat containing 6C	ENSG00000078687	463	903	492	995	713.25	Cytoplasm	other
TNS1	tensin 1	ENSG00000079308	2350	1688	6901	5490	4107.25	Plasma Membrane	other
TOLLIP	toll interacting protein	ENSG00000078902	27	13	31	54	31.25	Cytoplasm	other
TOMM7	translocase of outer mitochondrial membrane 7	ENSG00000196683	25	31	69	61	46.5	Cytoplasm	transporter
TOP1	topoisomerase (DNA) I	ENSG00000198900	733	1265	482	1660	1035	Nucleus	enzyme
TOP2A	topoisomerase (DNA) II alpha	ENSG00000131747	170	491	154	432	311.75	Nucleus	enzyme
TOX4	TOX high mobility group box family member 4	ENSG00000092203	208	296	365	540	352.25	Nucleus	other
TPGS2	tubulin polyglutamylase complex subunit 2	ENSG00000134779	579	421	532	1033	641.25	Nucleus	other
TPI1	triosephosphate isomerase 1	ENSG00000111669	67	16	17	20	30	Cytoplasm	enzyme
TPM1	tropomyosin 1 (alpha)	ENSG00000140416	30	12	16	18	19	Cytoplasm	other
TPM3	tropomyosin 3	ENSG00000143549	219	136	116	176	161.75	Cytoplasm	other
TPP1	tripeptidyl peptidase 1	ENSG00000166340	63	104	33	188	97	Cytoplasm	peptidase
TPR	translocated promoter region, nuclear basket protein	ENSG00000047410	36	139	45	155	93.75	Nucleus	transporter
TPT1	tumor protein, translationally-controlled 1	ENSG00000133112	7063	7568	6646	15450	9181.75	Cytoplasm	other
TPT1-AS1	TPT1 antisense RNA 1 [Source:HGNC Symbol	ENSG00000170919	30	46	48	148	68
TRA2A	transformer 2 alpha homolog	ENSG00000164548	92	254	92	235	168.25	Nucleus	other
TRA2B	transformer 2 beta homolog (Drosophila)	ENSG00000136527	122	332	167	368	247.25	Nucleus	other
TRAK1	trafficking kinesin protein 1	ENSG00000182606	87	43	154	203	121.75	Nucleus	other
TRAK2	trafficking kinesin protein 2	ENSG00000115993	1818	3411	2951	5177	3339.25	Plasma Membrane	transporter
TRAM1	translocation associated membrane protein 1	ENSG00000067167	9	8	11	52	20	Cytoplasm	other
TRIM10	tripartite motif containing 10	ENSG00000204613	277	212	573	337	349.75	Cytoplasm	other
TRIM23	tripartite motif containing 23	ENSG00000113595	598	978	430	1719	931.25	Nucleus	enzyme
TRIM24	tripartite motif containing 24	ENSG00000122779	54	150	37	200	110.25	Nucleus	transcription regulator
TRIM52-AS1	TRIM52 antisense RNA 1 (head to head) [Source:HGNC Symbol	ENSG00000248275	53	36	63	31	45.75
TRIM58	tripartite motif containing 58	ENSG00000162722	1493	1315	1093	2702	1650.75	Other	other
TRIP11	thyroid hormone receptor interactor 11	ENSG00000100815	113	339	154	339	236.25	Cytoplasm	transcription regulator
TRIP12	thyroid hormone receptor interactor 12	ENSG00000153827	772	1820	1940	3091	1905.75	Cytoplasm	enzyme
TRMT112	tRNA methyltransferase 11-2 homolog (S. cerevisiae)	ENSG00000173113	56	10	31	40	34.25	Cytoplasm	enzyme
TRMT1L	tRNA methyltransferase 1 like	ENSG00000121486	52	28	61	29	42.5	Other	enzyme
TROVE2	TROVE domain family member 2	ENSG00000116747	72	142	129	333	169	Nucleus	other
TRPM7	transient receptor potential cation channel subfamily M member 7	ENSG00000092439	125	264	96	131	154	Plasma Membrane	kinase
TSC1	tuberous sclerosis 1	ENSG00000165699	264	126	116	24	132.5	Cytoplasm	other
TSG101	tumor susceptibility 101	ENSG00000074319	115	184	156	210	166.25	Cytoplasm	transcription regulator
TSGA10	testis specific 10	ENSG00000135951	56	155	60	195	116.5	Cytoplasm	other
TSNAXIP1	translin associated factor X interacting protein 1	ENSG00000102904	14	25	33	119	47.75	Cytoplasm	other
TSPAN5	tetraspanin 5	ENSG00000168785	254	512	354	635	438.75	Plasma Membrane	other
TSPAN7	tetraspanin 7	ENSG00000156298	8	90	14	94	51.5	Plasma Membrane	other
TSPO2	translocator protein 2	ENSG00000112212	60	31	67	67	56.25	Cytoplasm	other
TSTA3	tissue specific transplantation antigen P35B	ENSG00000104522	2617	1217	3229	1321	2096	Plasma Membrane	enzyme
TTC1	tetratricopeptide repeat domain 1	ENSG00000113312	134	279	189	349	237.75	Cytoplasm	other
TTC17	tetratricopeptide repeat domain 17	ENSG00000052841	14	41	18	17	22.5	Cytoplasm	other
TTC21B	tetratricopeptide repeat domain 21B	ENSG00000123607	11	22	56	52	35.25	Extracellular Space	other
TTC25	tetratricopeptide repeat domain 25	ENSG00000204815	219	837	280	296	408	Cytoplasm	other
TTC3	tetratricopeptide repeat domain 3	ENSG00000182670	24	82	10	14	32.5	Cytoplasm	enzyme
TTC39A	tetratricopeptide repeat domain 39A	ENSG00000085831	85	96	38	91	77.5	Other	other
TTF1	transcription termination factor 1	ENSG00000125482	10	29	10	31	20	Nucleus	transcription regulator
TTPAL	alpha tocopherol transfer protein like	ENSG00000124120	26	7	14	32	19.75	Other	other
TUBA4A	tubulin alpha 4a	ENSG00000127824	188	211	407	284	272.5	Cytoplasm	other
TUBB	tubulin beta class I	ENSG00000196230	68	17	42	60	46.75	Cytoplasm	other
TUBB1	tubulin beta 1 class VI	ENSG00000101162	6	8	17	31	15.5	Cytoplasm	other
TUBB4B	tubulin beta 4B class IVb	ENSG00000188229	347	16	967	154	371	Cytoplasm	other
TXN	thioredoxin	ENSG00000136810	16	17	33	6	18	Cytoplasm	enzyme
TXN2	thioredoxin 2	ENSG00000100348	15	56	11	29	27.75	Cytoplasm	enzyme
TXNDC16	thioredoxin domain containing 16	ENSG00000087301	207	407	254	443	327.75	Extracellular Space	enzyme
TXNL1	thioredoxin like 1	ENSG00000091164	343	436	331	338	362	Cytoplasm	enzyme
TXNL4B	thioredoxin like 4B	ENSG00000140830	8	16	24	49	24.25	Nucleus	enzyme
TXNRD2	thioredoxin reductase 2	ENSG00000184470	255	123	648	382	352	Cytoplasm	enzyme
TYSND1	trypsin domain containing 1	ENSG00000156521	16	5	10	6	9.25	Cytoplasm	peptidase
U2SURP	U2 snRNP associated SURP domain containing	ENSG00000163714	27	78	34	51	47.5	Nucleus	other
UBA52	ubiquitin A-52 residue ribosomal protein fusion product 1	ENSG00000221983	40099	49270	45755	58182	48326.5	Cytoplasm	enzyme
UBAC1	UBA domain containing 1	ENSG00000130560	13	41	63	33	37.5	Nucleus	other
UBAC2	UBA domain containing 2	ENSG00000134882	9	53	18	25	26.25	Cytoplasm	enzyme
UBALD2	UBA like domain containing 2 [Source:HGNC Symbol	ENSG00000185262	13	21	22	16	18
UBAP1	ubiquitin associated protein 1	ENSG00000165006	182	217	1081	568	512	Cytoplasm	other
UBAP2	ubiquitin associated protein 2	ENSG00000137073	1821	4288	1664	2564	2584.25	Cytoplasm	other
UBAP2L	ubiquitin associated protein 2 like	ENSG00000143569	17	25	17	46	26.25	Other	other
UBB	ubiquitin B	ENSG00000170315	53935	97313	97421	38909	71894.5	Cytoplasm	enzyme
UBBP4	ubiquitin B pseudogene 4	ENSG00000263563	222	473	407	339	360.25	Other	other
UBC	ubiquitin C	ENSG00000150991	397	968	536	883	696	Cytoplasm	enzyme
UBE2B	ubiquitin conjugating enzyme E2 B	ENSG00000119048	101	155	112	263	157.75	Cytoplasm	enzyme
UBE2D2	ubiquitin conjugating enzyme E2 D2	ENSG00000131508	41	7	39	32	29.75	Cytoplasm	enzyme
UBE2D3	ubiquitin conjugating enzyme E2 D3	ENSG00000109332	4714	1994	3875	3096	3419.75	Cytoplasm	enzyme
UBE2F	ubiquitin conjugating enzyme E2 F (putative)	ENSG00000184182	7	22	46	15	22.5	Cytoplasm	enzyme
UBE2G2	ubiquitin conjugating enzyme E2 G2	ENSG00000184787	7	21	82	42	38	Cytoplasm	enzyme
UBE2H	ubiquitin conjugating enzyme E2 H	ENSG00000186591	328	197	312	433	317.5	Other	enzyme
UBE2K	ubiquitin conjugating enzyme E2 K	ENSG00000078140	201	366	211	325	275.75	Cytoplasm	transcription regulator
UBE2L6	ubiquitin conjugating enzyme E2 L6	ENSG00000156587	220	212	464	352	312	Cytoplasm	enzyme
UBE2O	ubiquitin conjugating enzyme E2 O	ENSG00000175931	95	30	133	178	109	Nucleus	enzyme
UBE2Q2	ubiquitin conjugating enzyme E2 Q2	ENSG00000140367	192	539	253	564	387	Other	enzyme
UBE2Q2P2	ubiquitin conjugating enzyme E2 Q2 pseudogene 2 [Source:HGNC Symbol	ENSG00000259429	84	127	27	115	88.25
UBE2V1	ubiquitin conjugating enzyme E2 V1	ENSG00000244687	19	27	11	17	18.5	Nucleus	transcription regulator
UBE3B	ubiquitin protein ligase E3B	ENSG00000151148	99	24	147	59	82.25	Extracellular Space	enzyme
UBE3C	ubiquitin protein ligase E3C	ENSG00000009335	30	79	39	117	66.25	Nucleus	enzyme
UBE4B	ubiquitination factor E4B	ENSG00000130939	20	63	47	61	47.75	Cytoplasm	enzyme
UBL5	ubiquitin like 5	ENSG00000198258	354	215	360	375	326	Cytoplasm	other
UBL7	ubiquitin like 7	ENSG00000138629	1966	2238	6200	4277	3670.25	Other	other
UBN2	ubinuclein 2	ENSG00000157741	97	72	37	121	81.75	Nucleus	other
UBQLN1	ubiquilin 1	ENSG00000135018	221	373	276	569	359.75	Cytoplasm	other
UBR1	ubiquitin protein ligase E3 component n-recognin 1	ENSG00000159459	18	45	38	34	33.75	Cytoplasm	enzyme
UBR2	ubiquitin protein ligase E3 component n-recognin 2	ENSG00000024048	238	533	264	361	349	Nucleus	enzyme
UBR4	ubiquitin protein ligase E3 component n-recognin 4	ENSG00000127481	24	37	10	28	24.75	Nucleus	enzyme
UBR5	ubiquitin protein ligase E3 component n-recognin 5	ENSG00000104517	5	11	26	98	35	Nucleus	enzyme
UBXN1	UBX domain protein 1	ENSG00000162191	54	20	164	68	76.5	Cytoplasm	other
UBXN10	UBX domain protein 10	ENSG00000162543	6	106	73	252	109.25	Other	other
UBXN2A	UBX domain protein 2A	ENSG00000173960	146	260	53	262	180.25	Other	other
UBXN4	UBX domain protein 4	ENSG00000144224	595	1418	627	1388	1007	Extracellular Space	other
UBXN6	UBX domain protein 6	ENSG00000167671	497	405	772	1024	674.5	Cytoplasm	other
UBXN7	UBX domain protein 7	ENSG00000163960	7	14	12	25	14.5	Nucleus	other
UCHL5	ubiquitin C-terminal hydrolase L5	ENSG00000116750	14	38	34	11	24.25	Cytoplasm	peptidase
UCP2	uncoupling protein 2	ENSG00000175567	1054	502	3392	1198	1536.5	Cytoplasm	transporter
UFC1	ubiquitin-fold modifier conjugating enzyme 1 [Source:HGNC Symbol	ENSG00000143222	100	239	267	169	193.75
UFD1L	ubiquitin fusion degradation 1 like (yeast)	ENSG00000070010	250	125	299	193	216.75	Cytoplasm	peptidase
UGGT2	UDP-glucose glycoprotein glucosyltransferase 2	ENSG00000102595	148	177	127	222	168.5	Cytoplasm	enzyme
UGP2	UDP-glucose pyrophosphorylase 2	ENSG00000169764	11	35	18	7	17.75	Cytoplasm	enzyme
UHMK1	U2AF homology motif (UHM) kinase 1	ENSG00000152332	5	122	20	109	64	Nucleus	kinase
UIMC1	ubiquitin interaction motif containing 1	ENSG00000087206	166	214	210	288	219.5	Nucleus	other
UNC45A	unc-45 myosin chaperone A	ENSG00000140553	119	308	349	270	261.5	Plasma Membrane	other
UPF2	UPF2 regulator of nonsense transcripts homolog (yeast)	ENSG00000151461	183	354	158	735	357.5	Cytoplasm	other
UPF3A	UPF3 regulator of nonsense transcripts homolog A (yeast)	ENSG00000169062	86	111	99	339	158.75	Nucleus	transporter
UPF3B	UPF3 regulator of nonsense transcripts homolog B (yeast)	ENSG00000125351	32	119	74	103	82	Nucleus	transporter
UQCR10	ubiquinol-cytochrome c reductase, complex III subunit X	ENSG00000184076	27	18	14	34	23.25	Cytoplasm	enzyme
UQCR11	ubiquinol-cytochrome c reductase, complex III subunit XI	ENSG00000127540	398	159	809	772	534.5	Cytoplasm	enzyme
UQCRB	ubiquinol-cytochrome c reductase binding protein	ENSG00000156467	820	1481	912	1918	1282.75	Cytoplasm	enzyme
UQCRC2	ubiquinol-cytochrome c reductase core protein II	ENSG00000140740	119	210	21	20	92.5	Cytoplasm	enzyme
UQCRH	ubiquinol-cytochrome c reductase hinge protein	ENSG00000173660	86	95	132	310	155.75	Cytoplasm	enzyme
UROD	uroporphyrinogen decarboxylase	ENSG00000126088	222	218	341	262	260.75	Cytoplasm	enzyme
USF3	upstream transcription factor family member 3	ENSG00000176542	49	85	18	73	56.25	Other	other
USMG5	up-regulated during skeletal muscle growth 5 homolog (mouse)	ENSG00000173915	5	8	50	19	20.5	Cytoplasm	other
USP1	ubiquitin specific peptidase 1	ENSG00000162607	554	1275	489	1385	925.75	Cytoplasm	peptidase
USP12	ubiquitin specific peptidase 12	ENSG00000152484	132	143	35	216	131.5	Cytoplasm	peptidase
USP14	ubiquitin specific peptidase 14	ENSG00000101557	25	84	16	51	44	Cytoplasm	peptidase
USP15	ubiquitin specific peptidase 15	ENSG00000135655	2318	2901	1331	2942	2373	Cytoplasm	peptidase
USP20	ubiquitin specific peptidase 20	ENSG00000136878	33	50	127	96	76.5	Cytoplasm	peptidase
USP32	ubiquitin specific peptidase 32	ENSG00000170832	166	461	431	768	456.5	Cytoplasm	other
USP33	ubiquitin specific peptidase 33	ENSG00000077254	176	242	124	231	193.25	Cytoplasm	peptidase
USP34	ubiquitin specific peptidase 34	ENSG00000115464	76	246	349	811	370.5	Extracellular Space	peptidase
USP37	ubiquitin specific peptidase 37	ENSG00000135913	16	48	15	29	27	Nucleus	peptidase
USP4	ubiquitin specific peptidase 4	ENSG00000114316	138	65	187	264	163.5	Nucleus	peptidase
USP48	ubiquitin specific peptidase 48	ENSG00000090686	245	404	204	671	381	Plasma Membrane	peptidase
USP6NL	USP6 N-terminal like	ENSG00000148429	12	10	21	19	15.5	Plasma Membrane	other
USP7	ubiquitin specific peptidase 7 (herpes virus-associated)	ENSG00000187555	66	323	68	413	217.5	Nucleus	peptidase
USP8	ubiquitin specific peptidase 8	ENSG00000138592	82	231	70	289	168	Cytoplasm	peptidase
USP9X	ubiquitin specific peptidase 9, X-linked	ENSG00000124486	18	119	55	81	68.25	Plasma Membrane	peptidase
UXS1	UDP-glucuronate decarboxylase 1	ENSG00000115652	10	84	29	37	40	Cytoplasm	enzyme
UXT	ubiquitously expressed prefoldin like chaperone	ENSG00000126756	56	35	101	188	95	Cytoplasm	transcription regulator
WAC	WW domain containing adaptor with coiled-coil	ENSG00000095787	96	265	149	288	199.5	Nucleus	other
VAPA	VAMP associated protein A	ENSG00000101558	15	31	19	34	24.75	Plasma Membrane	other
VAPB	VAMP associated protein B and C	ENSG00000124164	82	131	115	108	109	Plasma Membrane	other
WAPL	WAPL cohesin release factor	ENSG00000062650	53	144	117	228	135.5	Nucleus	other
WASF2	WAS protein family member 2	ENSG00000158195	477	369	332	830	502	Plasma Membrane	other
VBP1	VHL binding protein 1	ENSG00000155959	39	32	16	58	36.25	Cytoplasm	other
WBP1L	WW domain binding protein 1-like	ENSG00000166272	24	21	12	51	27	Other	other
WBP2	WW domain binding protein 2	ENSG00000132471	1123	828	2049	1530	1382.5	Cytoplasm	other
WBP4	WW domain binding protein 4	ENSG00000120688	107	242	131	287	191.75	Cytoplasm	other
WDR13	WD repeat domain 13	ENSG00000101940	21	16	54	111	50.5	Nucleus	other
WDR20	WD repeat domain 20	ENSG00000140153	16	59	30	62	41.75	Other	other
WDR26	WD repeat domain 26	ENSG00000162923	215	198	110	651	293.5	Cytoplasm	other
WDR45	WD repeat domain 45	ENSG00000196998	2189	1958	6952	5310	4102.25	Other	other
WDR46	WD repeat domain 46	ENSG00000227057	8	34	64	37	35.75	Nucleus	enzyme
WDR48	WD repeat domain 48	ENSG00000114742	43	21	22	12	24.5	Cytoplasm	other
WDR59	WD repeat domain 59	ENSG00000103091	20	36	63	18	34.25	Other	transporter
WDR60	WD repeat domain 60	ENSG00000126870	114	278	151	369	228	Extracellular Space	other
WDR83OS	WD repeat domain 83 opposite strand [Source:HGNC Symbol	ENSG00000105583	169	125	239	135	167
WHAMM	WAS protein homolog associated with actin, golgi membranes and microtubules	ENSG00000156232	101	82	94	53	82.5	Cytoplasm	other
WHAMMP2	WAS protein homolog associated with actin, golgi membranes and microtubules pseudogene 2 [Source:HGNC Symbol	ENSG00000248334	25	71	27	75	49.5
WHAMMP3	WAS protein homolog associated with actin, golgi membranes and microtubules pseudogene 3 [Source:HGNC Symbol	ENSG00000276141	24	86	57	90	64.25
WHSC1	Wolf-Hirschhorn syndrome candidate 1	ENSG00000109685	10	20	20	21	17.75	Nucleus	enzyme
WHSC1L1	Wolf-Hirschhorn syndrome candidate 1-like 1	ENSG00000147548	666	957	605	1000	807	Nucleus	enzyme
WIPI1	WD repeat domain, phosphoinositide interacting 1	ENSG00000070540	38	40	15	30	30.75	Cytoplasm	other
WNK1	WNK lysine deficient protein kinase 1	ENSG00000060237	837	1463	1216	2474	1497.5	Cytoplasm	kinase
VPS13A	vacuolar protein sorting 13 homolog A	ENSG00000197969	69	148	44	143	101	Cytoplasm	transporter
VPS13B	vacuolar protein sorting 13 homolog B	ENSG00000132549	478	1025	417	1220	785	Nucleus	transporter
VPS13C	vacuolar protein sorting 13 homolog C	ENSG00000129003	25	156	70	302	138.25	Cytoplasm	other
VPS28	VPS28, ESCRT-I subunit	ENSG00000160948	1021	947	2365	1191	1381	Cytoplasm	transporter
VPS29	VPS29, retromer complex component	ENSG00000111237	19	8	30	11	17	Cytoplasm	transporter
VPS35	VPS35 retromer complex component	ENSG00000069329	24	5	41	98	42	Cytoplasm	transporter
VPS50	VPS50, EARP/GARPII complex subunit	ENSG00000004766	14	39	54	67	43.5	Cytoplasm	other
VPS8	VPS8, CORVET complex subunit	ENSG00000156931	12	51	22	41	31.5	Other	other
VRK1	vaccinia related kinase 1	ENSG00000100749	329	791	333	881	583.5	Nucleus	kinase
VRK2	vaccinia related kinase 2	ENSG00000028116	45	88	63	153	87.25	Nucleus	kinase
VRK3	vaccinia related kinase 3	ENSG00000105053	117	59	102	45	80.75	Nucleus	kinase
WRN	Werner syndrome RecQ like helicase	ENSG00000165392	49	156	77	166	112	Nucleus	enzyme
WRNIP1	Werner helicase interacting protein 1	ENSG00000124535	65	7	40	36	37	Nucleus	enzyme
VTI1A	vesicle transport through interaction with t-SNAREs 1A	ENSG00000151532	71	85	36	61	63.25	Plasma Membrane	transporter
VTI1B	vesicle transport through interaction with t-SNAREs 1B	ENSG00000100568	62	36	25	32	38.75	Plasma Membrane	transporter
WWC3	WWC family member 3	ENSG00000047644	7	38	16	24	21.25	Cytoplasm	other
VWCE	von Willebrand factor C and EGF domains	ENSG00000167992	50	159	101	248	139.5	Other	other
WWP2	WW domain containing E3 ubiquitin protein ligase 2	ENSG00000198373	16	8	56	64	36	Cytoplasm	enzyme
XG	Xg blood group [Source:HGNC Symbol	ENSG00000124343	66	47	102	35	62.5
[truncated: 72 more rows]

## Sheet: Supplementary Table 3
Supplementary Table S3. Expressed genes in EVs (n = 4, cut-off value 5 counts). Data was annotated using QIAGEN’s Ingenuity® Pathway Analysis (IPA®, QIAGEN, Dec 16th, 2016) or Ensembl genome browser (http://www.ensembl.org, release 88 - Mar 2017). Genes uniquely expressed in EVs are higlighted in yellow.
Symbol	Entrez Gene Name	Ensembl ID	Exp Intensity (TPM; EV1)	Exp Intensity (TPM; EV2)	Exp Intensity (TPM; EV3)	Exp Intensity (TPM; EV4)	Exp Intensity(mean)	Location	Type(s)
ABCC13	ATP binding cassette subfamily C member 13 (pseudogene) [Source:HGNC Symbol	ENSG00000243064	156	296	215	2152	704.75
AC007256.5	OTTHUMG00000154748 (Vega gene) is an external reference matched to Gene ENSG00000213090	ENSG00000213090	89	893	27	91	275
ACKR1	atypical chemokine receptor 1 (Duffy blood group)	ENSG00000213088	127	867	204	566	441	Plasma Membrane	G-protein coupled receptor
ACTB	actin beta	ENSG00000075624	29	141	579	3168	979.25	Cytoplasm	other
ADIPOR1	adiponectin receptor 1	ENSG00000159346	7438	12081	8639	19034	11798	Plasma Membrane	transmembrane receptor
AGTPBP1	ATP/GTP binding protein 1	ENSG00000135049	84	10	540	42	169	Nucleus	peptidase
AHSP	alpha hemoglobin stabilizing protein	ENSG00000169877	2323	886	8561	1813	3395.75	Cytoplasm	other
AIF1	allograft inflammatory factor 1	ENSG00000204472	109	515	865	1126	653.75	Nucleus	other
AKAP7	A-kinase anchoring protein 7	ENSG00000118507	618	1645	1376	3078	1679.25	Plasma Membrane	other
AKAP9	A-kinase anchoring protein 9	ENSG00000127914	1180	713	731	1734	1089.5	Cytoplasm	other
ALAS2	5'-aminolevulinate synthase 2	ENSG00000158578	83112	43875	37496	20105	46147	Cytoplasm	enzyme
ALDOA	aldolase, fructose-bisphosphate A	ENSG00000149925	104	668	270	4157	1299.75	Cytoplasm	enzyme
ALS2CR12	amyotrophic lateral sclerosis 2 chromosome region candidate 12	ENSG00000155749	286	376	331	1072	516.25	Cytoplasm	other
AMD1	adenosylmethionine decarboxylase 1	ENSG00000123505	73	131	343	67	153.5	Cytoplasm	enzyme
ANAPC16	anaphase promoting complex subunit 16	ENSG00000166295	300	268	247	1105	480	Nucleus	other
ANK1	ankyrin 1	ENSG00000029534	623	921	256	1516	829	Plasma Membrane	other
ANP32E	acidic nuclear phosphoprotein 32 family member E	ENSG00000143401	233	1086	855	608	695.5	Nucleus	other
AP2B1	adaptor related protein complex 2 beta 1 subunit	ENSG00000006125	552	39	156	462	302.25	Plasma Membrane	transporter
AP2M1	adaptor related protein complex 2 mu 1 subunit	ENSG00000161203	3438	5120	2869	4110	3884.25	Cytoplasm	transporter
AP2S1	adaptor related protein complex 2 sigma 1 subunit	ENSG00000042753	80	340	46	60	131.5	Cytoplasm	transporter
APOBEC3C	apolipoprotein B mRNA editing enzyme catalytic subunit 3C	ENSG00000244509	430	2179	1989	900	1374.5	Other	enzyme
ARAF	A-Raf proto-oncogene, serine/threonine kinase	ENSG00000078061	92	515	12	733	338	Cytoplasm	kinase
ARF1	ADP ribosylation factor 1	ENSG00000143761	239	825	75	2135	818.5	Cytoplasm	enzyme
ARF4	ADP ribosylation factor 4	ENSG00000168374	16	3348	356	594	1078.5	Cytoplasm	enzyme
ARHGDIB	Rho GDP dissociation inhibitor beta	ENSG00000111348	2495	5920	3015	8225	4913.75	Cytoplasm	enzyme
ARHGEF12	Rho guanine nucleotide exchange factor 12	ENSG00000196914	1250	2299	991	259	1199.75	Cytoplasm	other
ARID4B	AT-rich interaction domain 4B	ENSG00000054267	585	80	624	2178	866.75	Nucleus	enzyme
ARL4A	ADP ribosylation factor like GTPase 4A	ENSG00000122644	5410	5690	7544	10849	7373.25	Nucleus	enzyme
ARL6IP1	ADP ribosylation factor like GTPase 6 interacting protein 1	ENSG00000170540	2526	2338	1658	3906	2607	Cytoplasm	other
ARPC3	actin related protein 2/3 complex subunit 3	ENSG00000111229	879	2047	1902	1864	1673	Cytoplasm	other
ARPC5	actin related protein 2/3 complex subunit 5	ENSG00000162704	557	3372	2132	3687	2437	Cytoplasm	other
ARRB2	arrestin beta 2	ENSG00000141480	26	402	49	398	218.75	Cytoplasm	other
ASCC2	activating signal cointegrator 1 complex subunit 2	ENSG00000100325	179	648	120	1594	635.25	Nucleus	other
ASPM	abnormal spindle microtubule assembly	ENSG00000066279	280	62	99	12	113.25	Nucleus	other
ATAD2	ATPase family, AAA domain containing 2	ENSG00000156802	219	252	538	8	254.25	Nucleus	enzyme
ATP5A1	ATP synthase, H+ transporting, mitochondrial F1 complex, alpha subunit 1, cardiac muscle	ENSG00000152234	366	977	44	1519	726.5	Cytoplasm	transporter
ATP5E	ATP synthase, H+ transporting, mitochondrial F1 complex, epsilon subunit	ENSG00000124172	9130	5369	7153	3768	6355	Cytoplasm	other
ATP5EP2	ATP synthase, H+ transporting, mitochondrial F1 complex, epsilon subunit pseudogene 2	ENSG00000180389	5	11	7	11	8.5	Cytoplasm	other
ATP5J2	ATP synthase, H+ transporting, mitochondrial Fo complex subunit F2	ENSG00000241468	48	98	86	61	73.25	Cytoplasm	transporter
ATP5L	ATP synthase, H+ transporting, mitochondrial Fo complex subunit G	ENSG00000167283	429	548	378	809	541	Cytoplasm	enzyme
ATP5S	ATP synthase, H+ transporting, mitochondrial Fo complex subunit s (factor B)	ENSG00000125375	1000	3506	1555	923	1746	Cytoplasm	transporter
B2M	beta-2-microglobulin	ENSG00000166710	12542	48669	19123	65195	36382.2	Plasma Membrane	transmembrane receptor
B4GALT3	beta-1,4-galactosyltransferase 3	ENSG00000158850	717	710	717	2077	1055.25	Cytoplasm	enzyme
BABAM1	BRISC and BRCA1 A complex member 1	ENSG00000105393	57	128	5	111	75.25	Nucleus	other
BAG1	BCL2 associated athanogene 1	ENSG00000107262	1011	1096	2311	29	1111.75	Cytoplasm	other
BBOF1	basal body orientation factor 1	ENSG00000119636	1392	1162	2001	2201	1689	Cytoplasm	other
BCL2A1	BCL2 related protein A1	ENSG00000140379	454	497	1037	6284	2068	Cytoplasm	other
BCL2L1	BCL2 like 1	ENSG00000171552	1007	1770	744	2796	1579.25	Cytoplasm	other
BCL2L13	BCL2 like 13	ENSG00000099968	241	1604	1262	5050	2039.25	Cytoplasm	other
BECN1	beclin 1	ENSG00000126581	1368	2155	126	4866	2128.75	Cytoplasm	other
BIN2	bridging integrator 2	ENSG00000110934	211	349	990	6021	1892.75	Plasma Membrane	other
BIRC2	baculoviral IAP repeat containing 2	ENSG00000110330	3373	8692	1862	9389	5829	Cytoplasm	enzyme
BLOC1S6	biogenesis of lysosomal organelles complex 1 subunit 6	ENSG00000104164	2217	5619	4812	15032	6920	Cytoplasm	other
BLVRB	biliverdin reductase B	ENSG00000090013	420	2121	69	9629	3059.75	Cytoplasm	enzyme
BNIP3L	BCL2 interacting protein 3 like	ENSG00000104765	203090	308438	308602	366257	296597	Cytoplasm	other
BPGM	bisphosphoglycerate mutase	ENSG00000172331	7504	7078	8505	10391	8369.5	Extracellular Space	phosphatase
BRD4	bromodomain containing 4	ENSG00000141867	147	16	11	12	46.5	Nucleus	kinase
BROX	BRO1 domain and CAAX motif containing	ENSG00000162819	350	502	43	1273	542	Cytoplasm	other
BSG	basigin (Ok blood group)	ENSG00000172270	1523	12084	1296	36097	12750	Plasma Membrane	transporter
BTF3	basic transcription factor 3	ENSG00000145741	13493	16681	13666	17150	15247.5	Nucleus	transcription regulator
BTG1	BTG anti-proliferation factor 1	ENSG00000133639	177	17	259	349	200.5	Nucleus	transcription regulator
BUD31	BUD31 homolog	ENSG00000106245	65	438	41	434	244.5	Nucleus	transcription regulator
C11orf58	chromosome 11 open reading frame 58	ENSG00000110696	1727	3720	1739	4364	2887.5	Other	other
C12orf29	chromosome 12 open reading frame 29	ENSG00000133641	62	853	146	195	314	Other	other
C14orf2	chromosome 14 open reading frame 2	ENSG00000156411	396	356	256	172	295	Cytoplasm	other
C19orf53	chromosome 19 open reading frame 53	ENSG00000104979	31	220	148	148	136.75	Other	other
C1D	C1D nuclear receptor corepressor	ENSG00000197223	336	410	353	647	436.5	Nucleus	transcription regulator
C1orf105	chromosome 1 open reading frame 105	ENSG00000180999	194	68	359	129	187.5	Other	other
C6orf62	chromosome 6 open reading frame 62	ENSG00000112308	688	1045	1683	2884	1575	Other	other
C7orf73	chromosome 7 open reading frame 73	ENSG00000243317	11491	8438	5242	8265	8359	Other	other
C9orf78	chromosome 9 open reading frame 78	ENSG00000136819	12697	37845	23094	20127	23440.8	Other	other
CA1	carbonic anhydrase 1	ENSG00000133742	33965	17913	17360	19648	22221.5	Cytoplasm	enzyme
CA2	carbonic anhydrase 2	ENSG00000104267	378	1247	387	1838	962.5	Cytoplasm	enzyme
CALM1 (includes others)	calmodulin 1	ENSG00000143933	750	4184	628	359	1480.25	Cytoplasm	other
CCAR1	cell division cycle and apoptosis regulator 1	ENSG00000060339	619	705	262	5368	1738.5	Nucleus	transcription regulator
CCDC18	coiled-coil domain containing 18	ENSG00000122483	663	1132	3176	3259	2057.5	Other	other
CCDC186	coiled-coil domain containing 186	ENSG00000165813	255	1815	708	2586	1341	Other	other
CCL5	C-C motif chemokine ligand 5	ENSG00000271503	66	236	197	858	339.25	Extracellular Space	cytokine
CCND3	cyclin D3	ENSG00000112576	36	653	9	57	188.75	Nucleus	other
CCNI	cyclin I	ENSG00000118816	6935	14816	12421	8746	10729.5	Other	other
CD44	CD44 molecule (Indian blood group)	ENSG00000026508	49	821	16	238	281	Plasma Membrane	enzyme
CD52	CD52 molecule	ENSG00000169442	607	3383	918	2031	1734.75	Plasma Membrane	other
CD59	CD59 molecule	ENSG00000085063	1154	871	1823	1291	1284.75	Plasma Membrane	other
CD63	CD63 molecule	ENSG00000135404	129	618	241	456	361	Plasma Membrane	other
CD74	CD74 molecule	ENSG00000019582	63	434	85	677	314.75	Plasma Membrane	transmembrane receptor
CDC27	cell division cycle 27	ENSG00000004897	3895	4099	7515	12601	7027.5	Nucleus	other
CDC42	cell division cycle 42	ENSG00000070831	1581	3252	1007	2789	2157.25	Cytoplasm	enzyme
CDC42BPA	CDC42 binding protein kinase alpha	ENSG00000143776	40	1855	1230	712	959.25	Cytoplasm	kinase
CDC42P6	cell division cycle 42 pseudogene 6 [Source:HGNC Symbol	ENSG00000237350	11	13	9	15	12
CDC42SE2	CDC42 small effector 2	ENSG00000158985	52	4686	270	398	1351.5	Plasma Membrane	other
CEP57	centrosomal protein 57	ENSG00000166037	440	1006	225	3045	1179	Cytoplasm	other
CETN2	centrin 2	ENSG00000147400	106	109	105	139	114.75	Nucleus	enzyme
CFL1	cofilin 1	ENSG00000172757	408	1687	126	2147	1092	Nucleus	other
CGGBP1	CGG triplet repeat binding protein 1	ENSG00000163320	672	2709	361	1209	1237.75	Nucleus	transcription regulator
CHD2	chromodomain helicase DNA binding protein 2	ENSG00000173575	363	413	299	1221	574	Nucleus	enzyme
CHMP2A	charged multivesicular body protein 2A	ENSG00000130724	148	1039	144	1615	736.5	Cytoplasm	other
CHMP3	charged multivesicular body protein 3	ENSG00000115561	306	1478	1002	580	841.5	Cytoplasm	other
CHPT1	choline phosphotransferase 1	ENSG00000111666	474	1182	11	961	657	Cytoplasm	enzyme
CISD2	CDGSH iron sulfur domain 2	ENSG00000145354	207	1024	7	226	366	Cytoplasm	other
CLIC1	chloride intracellular channel 1	ENSG00000213719	530	2283	95	477	846.25	Nucleus	ion channel
CNBP	CCHC-type zinc finger nucleic acid binding protein	ENSG00000169714	229	1106	937	1083	838.75	Nucleus	transcription regulator
CNN2	calponin 2	ENSG00000064666	108	990	37	2058	798.25	Cytoplasm	other
CNPPD1	cyclin Pas1/PHO80 domain containing 1	ENSG00000115649	115	1152	378	536	545.25	Other	other
COPS2	COP9 signalosome subunit 2	ENSG00000166200	571	4496	243	431	1435.25	Cytoplasm	other
COPS3	COP9 signalosome subunit 3	ENSG00000141030	525	3164	110	1683	1370.5	Cytoplasm	other
COX4I1	cytochrome c oxidase subunit 4I1	ENSG00000131143	368	799	162	1820	787.25	Cytoplasm	enzyme
COX6A1	cytochrome c oxidase subunit 6A1	ENSG00000111775	110	80	224	91	126.25	Cytoplasm	enzyme
COX6B1	cytochrome c oxidase subunit 6B1	ENSG00000126267	1192	831	2516	591	1282.5	Cytoplasm	enzyme
COX7A2	cytochrome c oxidase subunit 7A2	ENSG00000112695	144	221	330	460	288.75	Cytoplasm	enzyme
COX7B	cytochrome c oxidase subunit 7B	ENSG00000131174	351	316	158	12	209.25	Cytoplasm	enzyme
COX7C	cytochrome c oxidase subunit 7C	ENSG00000127184	71	268	732	394	366.25	Cytoplasm	enzyme
CPEB4	cytoplasmic polyadenylation element binding protein 4	ENSG00000113742	470	1984	456	383	823.25	Plasma Membrane	other
CR1L	complement component 3b/4b receptor 1-like	ENSG00000197721	686	1541	1297	1891	1353.75	Plasma Membrane	other
CREBRF	CREB3 regulatory factor	ENSG00000164463	165	127	37	885	303.5	Nucleus	other
CSDE1	cold shock domain containing E1	ENSG00000009307	1127	5912	3313	5592	3986	Cytoplasm	enzyme
CSNK2A1	casein kinase 2 alpha 1	ENSG00000101266	25	313	28	58	106	Nucleus	kinase
CSNK2B	casein kinase 2 beta	ENSG00000204435	17	109	36	70	58	Cytoplasm	kinase
CTA-363E6.6	OTTHUMG00000177225 (Vega gene) is an external reference matched to Gene ENSG00000260592	ENSG00000260592	336	744	1164	562	701.5
CTC-398G3.2	OTTHUMG00000157992 (Vega gene) is an external reference matched to Gene ENSG00000213303	ENSG00000213303	8	8	6	5	6.75
CTD-2561J22.5	OTTHUMG00000182846 (Vega gene) is an external reference matched to Gene ENSG00000268119	ENSG00000268119	332	1093	137	914	619
CTSB	cathepsin B	ENSG00000164733	1275	3185	1956	13544	4990	Cytoplasm	peptidase
CTSE	cathepsin E	ENSG00000196188	2242	1755	1403	1071	1617.75	Cytoplasm	peptidase
CYB5R1	cytochrome b5 reductase 1	ENSG00000159348	415	499	338	1062	578.5	Cytoplasm	enzyme
CYBRD1	cytochrome b reductase 1	ENSG00000071967	224	2564	57	646	872.75	Cytoplasm	enzyme
CYSTM1	cysteine rich transmembrane module containing 1	ENSG00000120306	911	1062	1498	1804	1318.75	Cytoplasm	other
DAZAP2	DAZ associated protein 2	ENSG00000183283	1872	7677	4482	9565	5899	Nucleus	other
DCAF12	DDB1 and CUL4 associated factor 12	ENSG00000198876	4125	4485	5219	8172	5500.25	Cytoplasm	other
DCAF6	DDB1 and CUL4 associated factor 6	ENSG00000143164	847	2689	785	8	1082.25	Nucleus	transcription regulator
DCP2	decapping mRNA 2	ENSG00000172795	105	2061	104	1226	874	Nucleus	enzyme
DCUN1D1	defective in cullin neddylation 1 domain containing 1	ENSG00000043093	5874	10942	6177	8175	7792	Nucleus	other
DDX5	DEAD-box helicase 5	ENSG00000108654	585	3346	2449	5548	2982	Nucleus	enzyme
DDX6	DEAD-box helicase 6	ENSG00000110367	1351	3264	4423	3689	3181.75	Nucleus	enzyme
DEK	DEK proto-oncogene	ENSG00000124795	354	2357	1155	1614	1370	Nucleus	transcription regulator
DHX40	DEAH-box helicase 40	ENSG00000108406	610	278	638	283	452.25	Other	enzyme
DLEU2	deleted in lymphocytic leukemia 2 (non-protein coding)	ENSG00000231607	172	864	187	310	383.25	Other	other
DMTN	dematin actin binding protein	ENSG00000158856	93	175	211	289	192	Plasma Membrane	other
DNAJA1	DnaJ heat shock protein family (Hsp40) member A1	ENSG00000086061	1097	5766	129	1554	2136.5	Nucleus	other
DNAJB4	DnaJ heat shock protein family (Hsp40) member B4	ENSG00000162616	2425	343	3141	368	1569.25	Nucleus	other
DPM2	dolichyl-phosphate mannosyltransferase polypeptide 2, regulatory subunit	ENSG00000136908	3978	4414	7389	2133	4478.5	Cytoplasm	enzyme
DYNLL1	dynein light chain LC8-type 1	ENSG00000088986	313	525	362	229	357.25	Cytoplasm	other
DYNLRB1	dynein light chain roadblock-type 1	ENSG00000125971	195	395	467	1063	530	Cytoplasm	other
E2F2	E2F transcription factor 2	ENSG00000007968	60	392	84	90	156.5	Nucleus	transcription regulator
EDF1	endothelial differentiation related factor 1	ENSG00000107223	68	62	10	175	78.75	Nucleus	transcription regulator
EEF1A1	eukaryotic translation elongation factor 1 alpha 1	ENSG00000156508	4706	24884	13225	17229	15011	Cytoplasm	translation regulator
EEF1A1P5	eukaryotic translation elongation factor 1 alpha 1 pseudogene 5 [Source:HGNC Symbol	ENSG00000196205	16	81	64	69	57.5
EEF2	eukaryotic translation elongation factor 2	ENSG00000167658	18	9	21	94	35.5	Cytoplasm	translation regulator
EID1	EP300 interacting inhibitor of differentiation 1	ENSG00000255302	19	584	89	402	273.5	Nucleus	transcription regulator
EIF1	eukaryotic translation initiation factor 1	ENSG00000173812	1840	14273	1023	20720	9464	Cytoplasm	translation regulator
EIF1B	eukaryotic translation initiation factor 1B	ENSG00000114784	4460	6595	3565	9646	6066.5	Cytoplasm	translation regulator
EIF2AK1	eukaryotic translation initiation factor 2 alpha kinase 1	ENSG00000086232	1215	2263	2524	6	1502	Cytoplasm	kinase
EIF3J	eukaryotic translation initiation factor 3 subunit J	ENSG00000104131	387	220	389	797	448.25	Cytoplasm	translation regulator
EIF4G2	eukaryotic translation initiation factor 4 gamma 2	ENSG00000110321	1437	1698	699	2011	1461.25	Cytoplasm	translation regulator
EIF5B	eukaryotic translation initiation factor 5B	ENSG00000158417	840	130	112	1827	727.25	Cytoplasm	translation regulator
ELOF1	elongation factor 1 homolog	ENSG00000130165	584	458	728	298	517	Nucleus	other
EMC3	ER membrane protein complex subunit 3	ENSG00000125037	6938	9236	17736	10848	11189.5	Nucleus	other
ENO1	enolase 1	ENSG00000074800	1146	2974	2353	5807	3070	Cytoplasm	enzyme
EPB41	erythrocyte membrane protein band 4.1	ENSG00000159023	16122	48011	29488	53040	36665.2	Plasma Membrane	other
EWSR1	EWS RNA binding protein 1	ENSG00000182944	431	794	382	984	647.75	Nucleus	other
FAM117A	family with sequence similarity 117 member A	ENSG00000121104	32	207	84	327	162.5	Other	transporter
FAM133B	family with sequence similarity 133 member B	ENSG00000234545	156	1180	334	308	494.5	Other	other
FAM204A	family with sequence similarity 204 member A	ENSG00000165669	182	27	1667	749	656.25	Other	other
FAM210B	family with sequence similarity 210 member B	ENSG00000124098	8088	14351	17171	13888	13374.5	Extracellular Space	other
FAM46C	family with sequence similarity 46 member C	ENSG00000183508	4138	19270	17752	13132	13573	Extracellular Space	other
FAU	FAU, ubiquitin like and ribosomal protein S30 fusion	ENSG00000149806	91	911	416	586	501	Cytoplasm	other
FAXDC2	fatty acid hydroxylase domain containing 2	ENSG00000170271	1360	12209	10665	9292	8381.5	Other	other
FBXL4	F-box and leucine rich repeat protein 4	ENSG00000112234	91	438	188	10	181.75	Nucleus	enzyme
FBXO7	F-box protein 7	ENSG00000100225	25066	102972	103786	182152	103494	Cytoplasm	enzyme
FCER1G	Fc fragment of IgE receptor Ig	ENSG00000158869	326	2193	449	1804	1193	Plasma Membrane	transmembrane receptor
FCF1	FCF1 rRNA-processing protein	ENSG00000119616	6	5	68	837	229	Nucleus	other
FCGR3A	Fc fragment of IgG receptor IIIa [Source:HGNC Symbol	ENSG00000203747	7	76	21	568	168
FCGR3A/FCGR3B	Fc fragment of IgG receptor IIIa	ENSG00000162747	201	1655	577	7364	2449.25	Plasma Membrane	transmembrane receptor
FECH	ferrochelatase	ENSG00000066926	949	29	7	253	309.5	Cytoplasm	enzyme
FGFR1OP2	FGFR1 oncogene partner 2	ENSG00000111790	2630	1845	5047	5588	3777.5	Cytoplasm	kinase
FIS1	fission, mitochondrial 1	ENSG00000214253	2742	1835	4197	2580	2838.5	Cytoplasm	other
FKBP8	FK506 binding protein 8	ENSG00000105701	118	646	61	2842	916.75	Cytoplasm	other
FOXO3	forkhead box O3	ENSG00000118689	2846	6685	6090	4599	5055	Nucleus	transcription regulator
FOXP1	forkhead box P1	ENSG00000114861	671	3028	496	1506	1425.25	Nucleus	other
FTL	ferritin light chain	ENSG00000087086	100451	149022	167521	162568	144890	Cytoplasm	enzyme
FTLP2	ferritin light chain pseudogene 2 [Source:HGNC Symbol	ENSG00000232368	32	48	45	72	49.25
FTLP3	ferritin light chain pseudogene 3 [Source:HGNC Symbol	ENSG00000226608	198	228	307	299	258
FUNDC2	FUN14 domain containing 2	ENSG00000165775	8	1553	213	728	625.5	Cytoplasm	other
FXYD5	FXYD domain containing ion transport regulator 5	ENSG00000089327	136	321	37	124	154.5	Plasma Membrane	ion channel
GABARAPL2	GABA type A receptor associated protein like 2	ENSG00000034713	1712	5536	1400	3913	3140.25	Cytoplasm	other
GAPDH	glyceraldehyde-3-phosphate dehydrogenase	ENSG00000111640	1195	5379	1220	4275	3017.25	Cytoplasm	enzyme
GATA1	GATA binding protein 1	ENSG00000102145	425	721	218	523	471.75	Nucleus	transcription regulator
GCC2	GRIP and coiled-coil domain containing 2	ENSG00000135968	75	123	2267	2548	1253.25	Cytoplasm	other
GHITM	growth hormone inducible transmembrane protein	ENSG00000165678	215	1607	554	1676	1013	Cytoplasm	other
GLUL	glutamate-ammonia ligase	ENSG00000135821	7438	16677	16435	9657	12551.8	Cytoplasm	enzyme
GMFG	glia maturation factor gamma	ENSG00000130755	280	1142	1278	3927	1656.75	Cytoplasm	growth factor
GNAS	GNAS complex locus	ENSG00000087460	1102	1816	1359	3202	1869.75	Plasma Membrane	enzyme
GNL3L	G protein nucleolar 3 like	ENSG00000130119	1057	30	473	126	421.5	Nucleus	other
GPSM3	G-protein signaling modulator 3	ENSG00000213654	84	229	41	328	170.5	Cytoplasm	other
GPX1	glutathione peroxidase 1	ENSG00000233276	70	54	59	1861	511	Cytoplasm	enzyme
GRINA	glutamate ionotropic receptor NMDA type subunit associated protein 1	ENSG00000178719	79	172	50	62	90.75	Other	ion channel
GSPT1	G1 to S phase transition 1	ENSG00000103342	2823	5613	3369	29	2958.5	Cytoplasm	translation regulator
GSTK1	glutathione S-transferase kappa 1	ENSG00000197448	583	2854	1605	1439	1620.25	Cytoplasm	enzyme
GTDC1	glycosyltransferase like domain containing 1	ENSG00000121964	8	38	504	25	143.75	Other	other
GUK1	guanylate kinase 1	ENSG00000143774	158	331	88	2356	733.25	Cytoplasm	kinase
GYPA	glycophorin A (MNS blood group)	ENSG00000170180	9817	2420	7141	13229	8151.75	Plasma Membrane	other
GYPB	glycophorin B (MNS blood group)	ENSG00000250361	2001	857	2543	78	1369.75	Plasma Membrane	other
GYPC	glycophorin C (Gerbich blood group)	ENSG00000136732	912	1457	1449	6340	2539.5	Plasma Membrane	other
H2AFZ	H2A histone family member Z	ENSG00000164032	252	122	431	613	354.5	Nucleus	other
H3F3A/H3F3B	H3 histone, family 3A	ENSG00000163041	113	9114	89	10511	4956.75	Nucleus	other
H3F3AP4	H3 histone, family 3A, pseudogene 4 [Source:HGNC Symbol	ENSG00000235655	15	191	20	725	237.75
H3F3B	H3 histone family member 3B [Source:HGNC Symbol	ENSG00000132475	68	9114	20	10511	4928.25
HAGH	hydroxyacylglutathione hydrolase	ENSG00000063854	6	614	516	759	473.75	Cytoplasm	enzyme
HBA1	hemoglobin subunit alpha 1 [Source:HGNC Symbol	ENSG00000206172	3057	4743	4123	67432	19838.8
HBA1/HBA2	hemoglobin subunit alpha 2	ENSG00000188536	28071	54252	39169	615101	184148	Extracellular Space	transporter
HBB	hemoglobin subunit beta	ENSG00000244734	29640775	34348535	51341230	20767062	3.40244e+07	Cytoplasm	transporter
HBBP1	hemoglobin subunit beta pseudogene 1 [Source:HGNC Symbol	ENSG00000229988	46	57	85	25	53.25
HBD	hemoglobin subunit delta	ENSG00000223609	42134	35597	63583	39432	45186.5	Other	transporter
HBE1	hemoglobin subunit epsilon 1	ENSG00000213931	10	16	27	13	16.5	Cytoplasm	transporter
HBG2	hemoglobin subunit gamma 2	ENSG00000196565	19786	6769	26671	3724	14237.5	Cytoplasm	other
HEMGN	hemogen	ENSG00000136929	30701	64989	59992	94442	62531	Nucleus	other
HIST1H4C	histone cluster 1, H4c	ENSG00000197061	848	465	1326	1132	942.75	Nucleus	other
HLA-A	major histocompatibility complex, class I, A	ENSG00000206503	404	359	18	1550	582.75	Plasma Membrane	other
HLA-B	major histocompatibility complex, class I, B	ENSG00000234745	145	643	73	2347	802	Plasma Membrane	transmembrane receptor
HLA-E	major histocompatibility complex, class I, E	ENSG00000204592	11	2329	54	5118	1878	Plasma Membrane	transmembrane receptor
HMGB1	high mobility group box 1	ENSG00000189403	1610	3375	2137	1398	2130	Nucleus	transcription regulator
HMGB1P10	high mobility group box 1 pseudogene 10 [Source:HGNC Symbol	ENSG00000213707	10	23	11	17	15.25
HMGB1P5	high mobility group box 1 pseudogene 5 [Source:HGNC Symbol	ENSG00000132967	74	119	159	57	102.25
HMGB1P6	high mobility group box 1 pseudogene 6 [Source:HGNC Symbol	ENSG00000259781	73	194	98	85	112.5
HMGB2	high mobility group box 2	ENSG00000164104	105	982	1053	2160	1075	Nucleus	transcription regulator
HMGN2	high mobility group nucleosomal binding domain 2	ENSG00000198830	29	696	39	1741	626.25	Nucleus	other
HNRNPA3	heterogeneous nuclear ribonucleoprotein A3	ENSG00000170144	62	961	211	338	393	Nucleus	other
HNRNPC	heterogeneous nuclear ribonucleoprotein C (C1/C2)	ENSG00000092199	440	2791	4259	4219	2927.25	Nucleus	other
HNRNPK	heterogeneous nuclear ribonucleoprotein K	ENSG00000165119	1155	7222	2068	8021	4616.5	Nucleus	transcription regulator
HPS1	HPS1, biogenesis of lysosomal organelles complex 3 subunit 1	ENSG00000107521	284	807	126	1606	705.75	Cytoplasm	other
HSP90AA1	heat shock protein 90 alpha family class A member 1	ENSG00000080824	507	758	1979	2078	1330.5	Cytoplasm	enzyme
HSPB1	heat shock protein family B (small) member 1	ENSG00000106211	113	208	22	344	171.75	Cytoplasm	other
IFI27	interferon alpha inducible protein 27	ENSG00000165949	323	428	152	375	319.5	Cytoplasm	other
IFIT1B	interferon induced protein with tetratricopeptide repeats 1B	ENSG00000204010	2045	3164	596	1301	1776.5	Cytoplasm	other
IFITM1	interferon induced transmembrane protein 1	ENSG00000185885	172	895	124	1517	677	Plasma Membrane	transmembrane receptor
IFITM2	interferon induced transmembrane protein 2	ENSG00000185201	1385	4808	2515	21075	7445.75	Other	other
IFITM3	interferon induced transmembrane protein 3	ENSG00000142089	301	585	273	1025	546	Plasma Membrane	other
IGF2BP2	insulin like growth factor 2 mRNA binding protein 2	ENSG00000073792	197	559	670	1266	673	Cytoplasm	translation regulator
IL32	interleukin 32	ENSG00000008517	145	231	232	351	239.75	Extracellular Space	cytokine
IRF2	interferon regulatory factor 2	ENSG00000168310	470	359	488	9	331.5	Nucleus	transcription regulator
ISCA1	iron-sulfur cluster assembly 1	ENSG00000135070	387	1107	70	2300	966	Cytoplasm	other
ITLN1	intelectin 1	ENSG00000179914	3145	3067	665	3020	2474.25	Plasma Membrane	other
ITSN1	intersectin 1	ENSG00000205726	68	98	929	863	489.5	Cytoplasm	other
JAZF1	JAZF zinc finger 1	ENSG00000153814	926	243	1108	153	607.5	Nucleus	transcription regulator
KAT2B	lysine acetyltransferase 2B	ENSG00000114166	993	2830	818	1162	1450.75	Nucleus	transcription regulator
KEL	Kell blood group, metallo-endopeptidase	ENSG00000197993	393	1597	793	40	705.75	Plasma Membrane	peptidase
KIAA0430	KIAA0430	ENSG00000166783	1524	164	939	2701	1332	Cytoplasm	other
KIAA1586	KIAA1586	ENSG00000168116	1143	4040	1725	3446	2588.5	Other	other
KIF20B	kinesin family member 20B	ENSG00000138182	975	1727	1884	201	1196.75	Nucleus	enzyme
KIF5B	kinesin family member 5B	ENSG00000170759	2026	2234	2993	4730	2995.75	Cytoplasm	other
KLF1	Kruppel like factor 1	ENSG00000105610	17	125	97	8	61.75	Nucleus	transcription regulator
LAMTOR4	late endosomal/lysosomal adaptor, MAPK and MTOR activator 4	ENSG00000188186	157	346	67	577	286.75	Cytoplasm	other
LAPTM5	lysosomal protein transmembrane 5	ENSG00000162511	1200	4862	973	4075	2777.5	Plasma Membrane	other
LDHB	lactate dehydrogenase B	ENSG00000111716	883	4219	1532	2144	2194.5	Cytoplasm	enzyme
LGALS3	lectin, galactoside binding soluble 3	ENSG00000131981	3211	7308	2116	6499	4783.5	Extracellular Space	other
LINC00570	long intergenic non-protein coding RNA 570 [Source:HGNC Symbol	ENSG00000224177	553	558	1649	1178	984.5
LINC01128	long intergenic non-protein coding RNA 1128 [Source:HGNC Symbol	ENSG00000228794	308	1271	162	609	587.5
LINC01578	long intergenic non-protein coding RNA 1578 [Source:HGNC Symbol	ENSG00000272888	5	395	101	372	218.25
LITAF	lipopolysaccharide induced TNF factor	ENSG00000189067	1161	8481	979	12711	5833	Nucleus	transcription regulator
LPIN2	lipin 2	ENSG00000101577	215	826	2362	1366	1192.25	Nucleus	phosphatase
LRRC75A-AS1	LRRC75A antisense RNA 1 [Source:HGNC Symbol	ENSG00000175061	286	1189	672	462	652.25
LSM1	LSM1 homolog, mRNA degradation associated	ENSG00000175324	102	116	39	223	120	Nucleus	other
LUC7L3	LUC7 like 3 pre-mRNA splicing factor	ENSG00000108848	90	126	811	110	284.25	Nucleus	other
MALAT1	metastasis associated lung adenocarcinoma transcript 1 (non-protein coding)	ENSG00000251562	3019	9227	6514	5376	6034	Nucleus	other
MAN1A2	mannosidase alpha class 1A member 2	ENSG00000198162	645	2406	1716	1421	1547	Cytoplasm	enzyme
MAP2K3	mitogen-activated protein kinase kinase 3	ENSG00000034152	10	132	264	1723	532.25	Cytoplasm	kinase
MAP3K13	mitogen-activated protein kinase kinase kinase 13	ENSG00000073803	341	179	133	1047	425	Cytoplasm	kinase
MARCH6	membrane associated ring-CH-type finger 6	ENSG00000145495	24	1188	465	1513	797.5	Cytoplasm	enzyme
MARCH8	membrane associated ring-CH-type finger 8	ENSG00000165406	640	2590	2175	3842	2311.75	Cytoplasm	enzyme
MAX	MYC associated factor X	ENSG00000125952	108	572	339	1068	521.75	Nucleus	transcription regulator
MBD5	methyl-CpG binding domain protein 5	ENSG00000204406	1200	696	372	1154	855.5	Nucleus	other
MBNL1	muscleblind like splicing regulator 1	ENSG00000152601	539	2036	2126	2335	1759	Nucleus	other
MBNL3	muscleblind like splicing regulator 3	ENSG00000076770	11318	54567	16316	69036	37809.2	Nucleus	other
MEGF9	multiple EGF like domains 9	ENSG00000106780	523	1792	242	912	867.25	Extracellular Space	other
Metazoa_SRP	Metazoan signal recognition particle RNA [Source:RFAM	ENSG00000278771	26	24	56	23	32.25
MGEA5	meningioma expressed antigen 5 (hyaluronidase)	ENSG00000198408	11	3496	890	24	1105.25	Cytoplasm	enzyme
MICAL2	microtubule associated monooxygenase, calponin and LIM domain containing 2	ENSG00000133816	82	372	236	718	352	Cytoplasm	enzyme
MIER1	MIER1 transcriptional regulator	ENSG00000198160	177	128	441	779	381.25	Nucleus	other
MINOS1	mitochondrial inner membrane organizing system 1	ENSG00000173436	17	133	18	22	47.5	Cytoplasm	other
MIR4435-2HG	MIR4435-2 host gene [Source:HGNC Symbol	ENSG00000172965	58	108	65	105	84
MKRN1	makorin ring finger protein 1	ENSG00000133606	2647	4803	7878	3285	4653.25	Other	enzyme
MOB1A	MOB kinase activator 1A	ENSG00000114978	31	1231	37	18	329.25	Plasma Membrane	other
MORF4L1	mortality factor 4 like 1	ENSG00000185787	492	2441	864	1848	1411.25	Nucleus	other
MORF4L1P1	mortality factor 4 like 1 pseudogene 1 [Source:HGNC Symbol	ENSG00000218283	20	66	9	54	37.25
MOSPD1	motile sperm domain containing 1	ENSG00000101928	1886	3046	2684	1573	2297.25	Other	other
MPP1	membrane palmitoylated protein 1	ENSG00000130830	5239	3769	5483	8139	5657.5	Plasma Membrane	kinase
MSRB1	methionine sulfoxide reductase B1	ENSG00000198736	183	368	146	1547	561	Other	other
MT2A	metallothionein 2A	ENSG00000125148	66	234	8	256	141	Cytoplasm	other
MT-ATP6	ATP synthase F0 subunit 6	ENSG00000198899	1847	2656	4960	11404	5216.75	Cytoplasm	transporter
MTATP6P1	mitochondrially encoded ATP synthase 6 pseudogene 1 [Source:HGNC Symbol	ENSG00000248527	227	396	660	1870	788.25
MT-ATP8	ATP synthase F0 subunit 8	ENSG00000228253	129	152	691	999	492.75	Cytoplasm	enzyme
MT-CO1	cytochrome c oxidase subunit I	ENSG00000198804	15409	47385	34079	126612	55871.2	Cytoplasm	enzyme
MTCO1P12	mitochondrially encoded cytochrome c oxidase I pseudogene 12 [Source:HGNC Symbol	ENSG00000237973	75	20	38	280	103.25
MT-CO2	cytochrome c oxidase subunit II	ENSG00000198712	798	3960	4088	17042	6472	Cytoplasm	enzyme
MT-CO3	cytochrome c oxidase III	ENSG00000198938	2113	7495	7287	23968	10215.8	Cytoplasm	enzyme
MT-CYB	cytochrome b	ENSG00000198727	1749	5105	7358	28690	10725.5	Cytoplasm	enzyme
MT-ND1	NADH dehydrogenase, subunit 1 (complex I)	ENSG00000198888	714	1773	5058	12049	4898.5	Cytoplasm	enzyme
MT-ND2	MTND2	ENSG00000198763	1686	5636	5100	10544	5741.5	Cytoplasm	enzyme
MTND2P28	mitochondrially encoded NADH:ubiquinone oxidoreductase core subunit 2 pseudogene 28 [Source:HGNC Symbol	ENSG00000225630	5	33	55	62	38.75
MT-ND3	NADH dehydrogenase, subunit 3 (complex I)	ENSG00000198840	36	79	33	502	162.5	Cytoplasm	enzyme
MT-ND4	NADH dehydrogenase, subunit 4 (complex I)	ENSG00000198886	1047	2807	6325	26950	9282.25	Cytoplasm	enzyme
MT-ND4L	NADH dehydrogenase, subunit 4L (complex I)	ENSG00000212907	484	346	1467	3999	1574	Cytoplasm	enzyme
MTND4P12	mitochondrially encoded NADH:ubiquinone oxidoreductase core subunit 4 pseudogene 12 [Source:HGNC Symbol	ENSG00000247627	5	6	6	43	15
MT-ND5	NADH dehydrogenase, subunit 5 (complex I)	ENSG00000198786	1829	1531	2742	16749	5712.75	Cytoplasm	enzyme
MT-ND6	NADH dehydrogenase, subunit 6 (complex I)	ENSG00000198695	267	162	228	2032	672.25	Cytoplasm	enzyme
MTPN	myotrophin	ENSG00000105887	83	1767	626	5684	2040	Nucleus	transcription regulator
MT-RNR1	s-rRNA	ENSG00000211459	34037	58782	56884	252356	100515	Cytoplasm	other
MT-RNR2	l-rRNA	ENSG00000210082	3124917	5453077	3037768	7954859	4.89266e+06	Other	other
MTRNR2L1	MT-RNR2-like 1	ENSG00000256618	886	1092	56	200	558.5	Other	other
MTRNR2L10	MT-RNR2-like 10 [Source:HGNC Symbol	ENSG00000256045	217	284	164	571	309
MTRNR2L12	MT-RNR2-like 12 [Source:HGNC Symbol	ENSG00000269028	1241	1797	1192	4739	2242.25
MTRNR2L6	MT-RNR2-like 6 [Source:HGNC Symbol	ENSG00000270672	15	14	20	45	23.5
MTRNR2L8	MT-RNR2-like 8 [Source:HGNC Symbol	ENSG00000255823	520	729	408	1564	805.25
MT-TL1	tRNA	ENSG00000209082	5	29	10	139	45.75	Cytoplasm	other
MT-TP	tRNA	ENSG00000210196	16	38	87	203	86	Cytoplasm	other
MXI1	MAX interactor 1, dimerization protein	ENSG00000119950	3567	5141	5501	8444	5663.25	Nucleus	transcription regulator
MYL12A	myosin light chain 12A	ENSG00000101608	369	2664	2550	3542	2281.25	Cytoplasm	other
MYL12B	myosin light chain 12B	ENSG00000118680	217	946	1263	2239	1166.25	Cytoplasm	other
MYL4	myosin light chain 4	ENSG00000198336	2029	1587	2527	3675	2454.5	Cytoplasm	other
MYL6	myosin light chain 6	ENSG00000092841	5998	5434	12578	5534	7386	Cytoplasm	other
N4BP2L2	NEDD4 binding protein 2 like 2	ENSG00000244754	699	602	732	3782	1453.75	Nucleus	transcription regulator
NACA	nascent polypeptide-associated complex alpha subunit	ENSG00000196531	1451	3197	6211	2000	3214.75	Cytoplasm	transcription regulator
NAPA	NSF attachment protein alpha	ENSG00000105402	123	931	107	696	464.25	Cytoplasm	transporter
NCOA4	nuclear receptor coactivator 4	ENSG00000266412	7012	8970	19779	15834	12898.8	Nucleus	transcription regulator
NDUFA1	NADH:ubiquinone oxidoreductase subunit A1	ENSG00000125356	207	349	114	1149	454.75	Cytoplasm	enzyme
NDUFA2	NADH:ubiquinone oxidoreductase subunit A2	ENSG00000131495	259	187	106	17	142.25	Cytoplasm	enzyme
NDUFA3	NADH:ubiquinone oxidoreductase subunit A3	ENSG00000170906	159	178	392	153	220.5	Cytoplasm	enzyme
NDUFA4	NDUFA4, mitochondrial complex associated	ENSG00000189043	379	1826	1239	552	999	Cytoplasm	enzyme
NDUFB1	NADH:ubiquinone oxidoreductase subunit B1	ENSG00000183648	64	91	16	72	60.75	Cytoplasm	enzyme
NDUFB4	NADH:ubiquinone oxidoreductase subunit B4	ENSG00000065518	69	1384	331	397	545.25	Cytoplasm	transporter
NDUFS5	NADH:ubiquinone oxidoreductase subunit S5	ENSG00000168653	154	873	673	1440	785	Cytoplasm	enzyme
NEDD8	neural precursor cell expressed, developmentally down-regulated 8	ENSG00000129559	127	114	272	85	149.5	Nucleus	enzyme
NEMF	nuclear export mediator factor	ENSG00000165525	646	3897	2505	3493	2635.25	Nucleus	other
NFE2	nuclear factor, erythroid 2	ENSG00000123405	3024	6832	3365	8936	5539.25	Nucleus	transcription regulator
NFIA	nuclear factor I A	ENSG00000162599	821	1309	671	5428	2057.25	Nucleus	transcription regulator
NFIX	nuclear factor I X	ENSG00000008441	804	942	320	1314	845	Nucleus	transcription regulator
NINJ2	ninjurin 2	ENSG00000171840	1579	2177	7299	2048	3275.75	Plasma Membrane	other
NIPBL	NIPBL, cohesin loading factor	ENSG00000164190	52	694	2140	678	891	Nucleus	transcription regulator
NOP10	NOP10 ribonucleoprotein	ENSG00000182117	116	444	216	421	299.25	Nucleus	other
NPRL3	NPR3 like, GATOR1 complex subunit	ENSG00000103148	390	487	1003	1837	929.25	Other	other
NRDC	nardilysin convertase	ENSG00000078618	15	4602	35	750	1350.5	Cytoplasm	peptidase
NSUN3	NOP2/Sun RNA methyltransferase family member 3	ENSG00000178694	4923	10237	9204	5405	7442.25	Other	other
NT5C3A	5'-nucleotidase, cytosolic IIIA	ENSG00000122643	897	240	2115	1364	1154	Cytoplasm	phosphatase
NTAN1	N-terminal asparagine amidase	ENSG00000157045	152	349	259	159	229.75	Nucleus	enzyme
NUDT4	nudix hydrolase 4	ENSG00000173598	161	58	781	256	314	Cytoplasm	phosphatase
NUSAP1	nucleolar and spindle associated protein 1	ENSG00000137804	374	767	764	99	501	Nucleus	other
OAZ1	ornithine decarboxylase antizyme 1	ENSG00000104904	3263	23996	2553	34412	16056	Cytoplasm	enzyme
OAZ2	ornithine decarboxylase antizyme 2	ENSG00000180304	67	799	43	361	317.5	Cytoplasm	other
OFD1	OFD1, centriole and centriolar satellite protein	ENSG00000046651	66	216	286	97	166.25	Plasma Membrane	other
OIP5-AS1	OIP5 antisense RNA 1 [Source:HGNC Symbol	ENSG00000247556	353	2561	11	1285	1052.5
OPA1	OPA1, mitochondrial dynamin like GTPase	ENSG00000198836	2153	855	3122	2061	2047.75	Cytoplasm	enzyme
OPTN	optineurin	ENSG00000123240	1628	4046	2372	7305	3837.75	Cytoplasm	other
OSER1	oxidative stress responsive serine rich 1	ENSG00000132823	539	2560	748	1522	1342.25	Other	enzyme
OST4	oligosaccharyltransferase complex subunit 4, non-catalytic	ENSG00000228474	2603	1698	4756	3202	3064.75	Other	other
PA2G4	proliferation-associated 2G4	ENSG00000170515	157	631	646	1213	661.75	Nucleus	transcription regulator
PABPC1	poly(A) binding protein cytoplasmic 1	ENSG00000070756	1318	1290	518	1404	1132.5	Cytoplasm	translation regulator
PAIP2	poly(A) binding protein interacting protein 2	ENSG00000120727	54	1719	184	1903	965	Cytoplasm	translation regulator
PCBP2	poly(rC) binding protein 2	ENSG00000197111	661	1027	1170	162	755	Nucleus	other
PCED1B-AS1	PCED1B antisense RNA 1 [Source:HGNC Symbol	ENSG00000247774	110	1681	43	296	532.5
PCGF5	polycomb group ring finger 5	ENSG00000180628	285	609	978	421	573.25	Cytoplasm	other
PCMTD1	protein-L-isoaspartate (D-aspartate) O-methyltransferase domain containing 1	ENSG00000168300	128	2433	563	2711	1458.75	Cytoplasm	enzyme
PCMTD2	protein-L-isoaspartate (D-aspartate) O-methyltransferase domain containing 2	ENSG00000203880	30	97	35	16	44.5	Cytoplasm	enzyme
PCNP	PEST proteolytic signal containing nuclear protein	ENSG00000081154	331	3432	416	2055	1558.5	Nucleus	other
PCTP	phosphatidylcholine transfer protein	ENSG00000141179	8	711	34	636	347.25	Cytoplasm	transporter
PDCD10	programmed cell death 10	ENSG00000114209	2778	5697	2611	5292	4094.5	Cytoplasm	other
PDZK1IP1	PDZK1 interacting protein 1	ENSG00000162366	3041	6316	2418	3226	3750.25	Extracellular Space	other
PET100	PET100 homolog	ENSG00000229833	53	93	8	179	83.25	Other	other
PF4	platelet factor 4	ENSG00000163737	106	349	72	832	339.75	Extracellular Space	cytokine
PFDN5	prefoldin subunit 5	ENSG00000123349	1870	3322	6447	2441	3520	Nucleus	transcription regulator
PGK1	phosphoglycerate kinase 1	ENSG00000102144	494	170	1641	1421	931.5	Cytoplasm	kinase
PIAS1	protein inhibitor of activated STAT 1	ENSG00000033800	1023	1315	708	1552	1149.5	Nucleus	transcription regulator
PIGC	phosphatidylinositol glycan anchor biosynthesis class C	ENSG00000135845	2221	3066	6126	2683	3524	Cytoplasm	enzyme
PIP4K2A	phosphatidylinositol-5-phosphate 4-kinase type 2 alpha	ENSG00000150867	1718	1549	2007	1195	1617.25	Cytoplasm	kinase
PKM	pyruvate kinase, muscle	ENSG00000067225	7	1168	72	444	422.75	Cytoplasm	kinase
PLAC8	placenta specific 8	ENSG00000145287	65	977	254	155	362.75	Nucleus	other
PLVAP	plasmalemma vesicle associated protein	ENSG00000130300	7	376	20	763	291.5	Plasma Membrane	other
PNRC1	proline rich nuclear receptor coactivator 1	ENSG00000146278	221	1628	896	908	913.25	Nucleus	other
POC1B	POC1 centriolar protein B	ENSG00000139323	6547	5435	4024	1687	4423.25	Cytoplasm	other
POLR1D	RNA polymerase I subunit D	ENSG00000186184	1785	577	816	2226	1351	Nucleus	enzyme
POLR2J	RNA polymerase II subunit J	ENSG00000005075	279	322	133	610	336	Nucleus	enzyme
POMP	proteasome maturation protein	ENSG00000132963	240	537	912	865	638.5	Nucleus	other
PPBP	pro-platelet basic protein	ENSG00000163736	1854	1766	1417	4598	2408.75	Extracellular Space	cytokine
PPIA	peptidylprolyl isomerase A	ENSG00000196262	767	279	1530	1490	1016.5	Cytoplasm	enzyme
PPM1A	protein phosphatase, Mg2+/Mn2+ dependent 1A	ENSG00000100614	170	1538	2204	2975	1721.75	Cytoplasm	phosphatase
PPP1CB	protein phosphatase 1 catalytic subunit beta	ENSG00000213639	397	1062	186	475	530	Cytoplasm	phosphatase
PPP1R18	protein phosphatase 1 regulatory subunit 18	ENSG00000146112	5	527	194	565	322.75	Other	other
PPP4R2	protein phosphatase 4 regulatory subunit 2	ENSG00000163605	289	1909	285	284	691.75	Cytoplasm	other
PRDX2	peroxiredoxin 2	ENSG00000167815	2109	1048	724	957	1209.5	Cytoplasm	enzyme
PRDX5	peroxiredoxin 5	ENSG00000126432	657	2599	991	3794	2010.25	Cytoplasm	enzyme
PRDX6	peroxiredoxin 6	ENSG00000117592	15457	12817	23742	12812	16207	Cytoplasm	enzyme
PRR13	proline rich 13	ENSG00000205352	8	680	178	791	414.25	Nucleus	other
PRR34-AS1	PRR34 antisense RNA 1 [Source:HGNC Symbol	ENSG00000241990	24	24	21	69	34.5
PSAP	prosaposin	ENSG00000197746	7130	10044	3260	6300	6683.5	Extracellular Space	other
PSMA7	proteasome subunit alpha 7	ENSG00000101182	53	188	181	7	107.25	Cytoplasm	peptidase
PSMB1	proteasome subunit beta 1	ENSG00000008018	177	419	923	653	543	Cytoplasm	peptidase
PSMC3	proteasome 26S subunit, ATPase 3	ENSG00000165916	294	707	41	26	267	Nucleus	transcription regulator
PSME1	proteasome activator subunit 1	ENSG00000092010	473	2214	177	2650	1378.5	Cytoplasm	other
PSMF1	proteasome inhibitor subunit 1	ENSG00000125818	326	4110	951	6539	2981.5	Cytoplasm	other
PTGES3	prostaglandin E synthase 3	ENSG00000110958	29	447	424	740	410	Cytoplasm	enzyme
PTMA	prothymosin, alpha	ENSG00000187514	193	2928	250	3552	1730.75	Nucleus	other
PTMS	parathymosin	ENSG00000159335	155	92	106	159	128	Nucleus	other
R3HDM4	R3H domain containing 4	ENSG00000198858	281	2230	643	2011	1291.25	Other	other
RAB2B	RAB2B, member RAS oncogene family	ENSG00000129472	1952	1185	3593	2215	2236.25	Plasma Membrane	enzyme
RABGAP1L	RAB GTPase activating protein 1 like	ENSG00000152061	1848	13151	9237	5117	7338.25	Cytoplasm	other
RAC2	ras-related C3 botulinum toxin substrate 2 (rho family, small GTP binding protein Rac2)	ENSG00000128340	82	1593	32	2513	1055	Cytoplasm	enzyme
RACK1	receptor for activated C kinase 1	ENSG00000204628	548	1531	1474	1593	1286.5	Cytoplasm	enzyme
RALBP1	ralA binding protein 1	ENSG00000017797	429	315	105	1511	590	Cytoplasm	enzyme
RBM38	RNA binding motif protein 38	ENSG00000132819	27	5	123	705	215	Nucleus	other
RBM8A	RNA binding motif protein 8A	ENSG00000265241	263	485	238	529	378.75	Nucleus	other
RBX1	ring-box 1	ENSG00000100387	749	452	713	1326	810	Cytoplasm	enzyme
RGS10	regulator of G-protein signaling 10	ENSG00000148908	103	159	62	301	156.25	Cytoplasm	other
RGS2	regulator of G-protein signaling 2	ENSG00000116741	386	4232	585	10843	4011.5	Nucleus	other
RHCE/RHD	Rh blood group D antigen	ENSG00000187010	119	521	401	1673	678.5	Plasma Membrane	transporter
RHOG	ras homolog family member G	ENSG00000177105	7	103	50	216	94	Cytoplasm	enzyme
RIOK3	RIO kinase 3	ENSG00000101782	11988	84605	21768	60895	44814	Cytoplasm	kinase
RMND5A	required for meiotic nuclear division 5 homolog A	ENSG00000153561	225	3624	3563	3073	2621.25	Nucleus	other
RN7SL128P	RNA, 7SL, cytoplasmic 128, pseudogene [Source:HGNC Symbol	ENSG00000240869	10	7	14	6	9.25
RN7SL2	RNA, 7SL, cytoplasmic 2 [Source:HGNC Symbol	ENSG00000274012	1941	2371	8304	795	3352.75
RN7SL4P	RNA, 7SL, cytoplasmic 4, pseudogene [Source:HGNC Symbol	ENSG00000263740	28	19	39	16	25.5
RN7SL5P	RNA, 7SL, cytoplasmic 5, pseudogene [Source:HGNC Symbol	ENSG00000265735	19	25	20	6	17.5
RNF10	ring finger protein 10	ENSG00000022840	1716	1009	2480	1992	1799.25	Cytoplasm	enzyme
RNF11	ring finger protein 11	ENSG00000123091	1904	1919	999	761	1395.75	Cytoplasm	enzyme
RNF14	ring finger protein 14	ENSG00000013561	197	231	1303	3154	1221.25	Other	transcription regulator
RNF19A	ring finger protein 19A, RBR E3 ubiquitin protein ligase	ENSG00000034677	635	139	576	263	403.25	Nucleus	enzyme
RP11-1299A16.3	OTTHUMG00000175889 (Vega gene) is an external reference matched to Gene ENSG00000260641	ENSG00000260641	62	62	144	144	103
RP11-146N23.1	OTTHUMG00000019625 (Vega gene) is an external reference matched to Gene ENSG00000232176	ENSG00000232176	8	9	10	12	9.75
RP11-16F15.2	OTTHUMG00000158305 (Vega gene) is an external reference matched to Gene ENSG00000239470	ENSG00000239470	8	16	10	19	13.25
RP11-203F10.6	OTTHUMG00000057669 (Vega gene) is an external reference matched to Gene ENSG00000219133	ENSG00000219133	14	18	13	17	15.5
RP11-26H16.1	OTTHUMG00000002673 (Vega gene) is an external reference matched to Gene ENSG00000232037	ENSG00000232037	13	8	12	8	10.25
RP11-366M4.1	OTTHUMG00000157594 (Havana gene) is an external reference matched to Gene ENSG00000240674	ENSG00000240674	8	12	8	5	8.25
RP11-407P2.1	OTTHUMG00000157742 (Havana gene) is an external reference matched to Gene ENSG00000239374	ENSG00000239374	6	8	8	10	8
RP11-466H18.1	OTTHUMG00000158484 (Vega gene) is an external reference matched to Gene ENSG00000244398	ENSG00000244398	11	11	18	33	18.25
RP11-613M5.2	OTTHUMG00000157622 (Vega gene) is an external reference matched to Gene ENSG00000243071	ENSG00000243071	14	17	19	12	15.5
RP11-678G14.3	OTTHUMG00000182863 (Vega gene) is an external reference matched to Gene ENSG00000268555	ENSG00000268555	615	1843	952	1979	1347.25
RP11-712B9.2	OTTHUMG00000167830 (Vega gene) is an external reference matched to Gene ENSG00000245552	ENSG00000245552	250	922	472	1018	665.5
RP11-734J24.1	OTTHUMG00000158594 (Vega gene) is an external reference matched to Gene ENSG00000243181	ENSG00000243181	21	38	59	59	44.25
RP11-84E17.1	OTTHUMG00000192196 (Vega gene) is an external reference matched to Gene ENSG00000279483	ENSG00000279483	19	55	78	33	46.25
RP11-85G21.3	OTTHUMG00000185718 (Vega gene) is an external reference matched to Gene ENSG00000271736	ENSG00000271736	486	1377	739	1291	973.25
RP11-864N7.2	OTTHUMG00000158412 (Vega gene) is an external reference matched to Gene ENSG00000227615	ENSG00000227615	59	79	76	53	66.75
RP5-1154L15.2	OTTHUMG00000168057 (Vega gene) is an external reference matched to Gene ENSG00000256020	ENSG00000256020	217	368	219	212	254
RPIA	ribose 5-phosphate isomerase A	ENSG00000153574	520	4502	1010	1745	1944.25	Cytoplasm	enzyme
RPL10	ribosomal protein L10	ENSG00000147403	572	3040	2817	2656	2271.25	Cytoplasm	other
RPL10P9	ribosomal protein L10 pseudogene 9 [Source:HGNC Symbol	ENSG00000233913	18	5	25	212	65
RPL11	ribosomal protein L11	ENSG00000142676	399	1436	1383	829	1011.75	Cytoplasm	other
RPL12	ribosomal protein L12	ENSG00000197958	1226	1834	1729	1423	1553	Nucleus	other
RPL13	ribosomal protein L13	ENSG00000167526	36	103	60	23	55.5	Nucleus	other
RPL13A	ribosomal protein L13a	ENSG00000142541	406	2258	1322	1841	1456.75	Cytoplasm	other
RPL14	ribosomal protein L14	ENSG00000188846	382	1813	1257	995	1111.75	Cytoplasm	other
RPL15	ribosomal protein L15	ENSG00000174748	1189	5075	2858	1823	2736.25	Cytoplasm	other
RPL18	ribosomal protein L18	ENSG00000063177	37	1154	9	747	486.75	Cytoplasm	other
RPL18A	ribosomal protein L18a	ENSG00000105640	85	1574	31	1314	751	Cytoplasm	other
RPL19	ribosomal protein L19	ENSG00000108298	778	2771	3327	1572	2112	Cytoplasm	other
RPL21	ribosomal protein L21	ENSG00000122026	40658	67267	74048	50380	58088.2	Cytoplasm	other
RPL21P119	ribosomal protein L21 pseudogene 119 [Source:HGNC Symbol	ENSG00000220793	15	20	33	22	22.5
RPL21P120	ribosomal protein L21 pseudogene 120 [Source:HGNC Symbol	ENSG00000244582	13	29	41	21	26
RPL21P134	ribosomal protein L21 pseudogene 134 [Source:HGNC Symbol	ENSG00000233254	6	29	10	11	14
RPL21P16	ribosomal protein L21 pseudogene 16 [Source:HGNC Symbol	ENSG00000220842	121	169	228	169	171.75
RPL21P18	ribosomal protein L21 pseudogene 18 [Source:HGNC Symbol	ENSG00000213343	16	18	20	11	16.25
RPL21P28	ribosomal protein L21 pseudogene 28 [Source:HGNC Symbol	ENSG00000220749	58	178	174	105	128.75
RPL21P75	ribosomal protein L21 pseudogene 75 [Source:HGNC Symbol	ENSG00000213860	135	253	309	210	226.75
RPL22	ribosomal protein L22	ENSG00000116251	608	36	611	731	496.5	Nucleus	other
RPL23	ribosomal protein L23	ENSG00000125691	71	702	762	1167	675.5	Cytoplasm	other
RPL23A	ribosomal protein L23a	ENSG00000198242	436	2028	797	1429	1172.5	Cytoplasm	other
RPL24	ribosomal protein L24	ENSG00000114391	100	963	1006	455	631	Cytoplasm	other
RPL26	ribosomal protein L26	ENSG00000161970	126	314	151	101	173	Cytoplasm	other
RPL27	ribosomal protein L27	ENSG00000131469	219	1319	622	548	677	Cytoplasm	other
RPL27A	ribosomal protein L27a	ENSG00000166441	336	2994	1592	1590	1628	Cytoplasm	other
RPL28	ribosomal protein L28	ENSG00000108107	47	457	95	468	266.75	Cytoplasm	other
RPL29	ribosomal protein L29	ENSG00000162244	161	747	305	640	463.25	Cytoplasm	other
RPL3	ribosomal protein L3	ENSG00000100316	1141	5035	1032	4279	2871.75	Nucleus	other
RPL30	ribosomal protein L30	ENSG00000156482	549	882	1383	780	898.5	Cytoplasm	other
RPL31	ribosomal protein L31	ENSG00000071082	957	2917	3887	1943	2426	Cytoplasm	other
RPL32	ribosomal protein L32	ENSG00000144713	1028	1980	3330	584	1730.5	Cytoplasm	other
RPL34	ribosomal protein L34	ENSG00000109475	1224	2273	1774	2361	1908	Cytoplasm	other
RPL35	ribosomal protein L35	ENSG00000136942	331	347	132	738	387	Cytoplasm	other
RPL35A	ribosomal protein L35a	ENSG00000182899	1809	2205	2164	1597	1943.75	Cytoplasm	other
RPL36	ribosomal protein L36	ENSG00000130255	303	895	97	534	457.25	Cytoplasm	other
RPL36AL	ribosomal protein L36a like	ENSG00000165502	361	1418	1319	594	923	Cytoplasm	other
RPL37	ribosomal protein L37	ENSG00000145592	173	1103	810	959	761.25	Cytoplasm	other
RPL37A	ribosomal protein L37a	ENSG00000197756	176	783	513	475	486.75	Cytoplasm	other
RPL38	ribosomal protein L38	ENSG00000172809	1359	842	1124	1138	1115.75	Cytoplasm	other
RPL39	ribosomal protein L39	ENSG00000198918	189	571	734	703	549.25	Cytoplasm	other
RPL4	ribosomal protein L4	ENSG00000174444	316	988	1064	1182	887.5	Cytoplasm	enzyme
RPL41	ribosomal protein L41	ENSG00000229117	1008	4102	3431	2024	2641.25	Cytoplasm	other
RPL41P1	ribosomal protein L41 pseudogene 1 [Source:HGNC Symbol	ENSG00000227063	38	141	142	90	102.75
RPL41P5	ribosomal protein L41 pseudogene 5 [Source:HGNC Symbol	ENSG00000256393	9	49	79	43	45
RPL5	ribosomal protein L5	ENSG00000122406	707	3062	2861	3697	2581.75	Cytoplasm	other
RPL6	ribosomal protein L6	ENSG00000089009	142	1125	764	1394	856.25	Nucleus	other
RPL7	ribosomal protein L7	ENSG00000147604	4830	12756	15214	9576	10594	Nucleus	transcription regulator
RPL7P1	ribosomal protein L7 pseudogene 1 [Source:HGNC Symbol	ENSG00000214485	14	30	30	19	23.25
RPL7P9	ribosomal protein L7 pseudogene 9 [Source:HGNC Symbol	ENSG00000137970	39	101	178	77	98.75
RPL8	ribosomal protein L8	ENSG00000161016	236	423	349	510	379.5	Other	other
RPL9	ribosomal protein L9	ENSG00000163682	256	2957	1099	1109	1355.25	Nucleus	other
RPL9P9	ribosomal protein L9 pseudogene 9 [Source:HGNC Symbol	ENSG00000237550	40	75	80	206	100.25
RPLP0	ribosomal protein lateral stalk subunit P0	ENSG00000089157	63	2543	1033	272	977.75	Cytoplasm	other
RPLP1	ribosomal protein lateral stalk subunit P1	ENSG00000137818	816	1939	324	2470	1387.25	Cytoplasm	other
RPLP2	ribosomal protein lateral stalk subunit P2	ENSG00000177600	186	1275	528	1163	788	Cytoplasm	other
RPS11	ribosomal protein S11	ENSG00000142534	1805	2799	3690	1589	2470.75	Cytoplasm	other
RPS12	ribosomal protein S12	ENSG00000112306	17410	33618	29607	22534	25792.2	Cytoplasm	other
RPS13	ribosomal protein S13	ENSG00000110700	1385	3410	1953	1584	2083	Cytoplasm	other
RPS14	ribosomal protein S14	ENSG00000164587	998	4656	5266	4655	3893.75	Cytoplasm	translation regulator
RPS15A	ribosomal protein S15a	ENSG00000134419	384	1198	1234	1039	963.75	Cytoplasm	other
RPS16	ribosomal protein S16	ENSG00000105193	214	1135	176	495	505	Cytoplasm	other
RPS17	ribosomal protein S17	ENSG00000182774	190	1311	1186	545	808	Cytoplasm	other
RPS18	ribosomal protein S18	ENSG00000231500	879	4452	1867	1124	2080.5	Cytoplasm	other
RPS19	ribosomal protein S19	ENSG00000105372	509	3992	1016	1618	1783.75	Cytoplasm	other
RPS20	ribosomal protein S20	ENSG00000008988	391	2020	1582	1612	1401.25	Cytoplasm	other
RPS23	ribosomal protein S23	ENSG00000186468	75	429	194	71	192.25	Cytoplasm	translation regulator
RPS24	ribosomal protein S24	ENSG00000138326	93	493	1078	2425	1022.25	Cytoplasm	other
RPS25	ribosomal protein S25	ENSG00000118181	1718	4600	6024	2476	3704.5	Cytoplasm	other
RPS26	ribosomal protein S26	ENSG00000197728	172	432	120	615	334.75	Cytoplasm	other
RPS27	ribosomal protein S27	ENSG00000177954	659	3879	3135	2911	2646	Cytoplasm	other
RPS27A	ribosomal protein S27a	ENSG00000143947	338	3060	1748	4908	2513.5	Cytoplasm	other
RPS29	ribosomal protein S29	ENSG00000213741	543	1500	1148	766	989.25	Cytoplasm	other
RPS3	ribosomal protein S3	ENSG00000149273	620	3542	2065	2138	2091.25	Cytoplasm	enzyme
RPS3A	ribosomal protein S3A	ENSG00000145425	474	2818	1509	1342	1535.75	Nucleus	other
RPS3AP6	ribosomal protein S3A pseudogene 6 [Source:HGNC Symbol	ENSG00000234797	8	85	43	24	40
RPS4X	ribosomal protein S4, X-linked	ENSG00000198034	402	3454	1428	1627	1727.75	Cytoplasm	other
RPS5	ribosomal protein S5	ENSG00000083845	79	1326	405	468	569.5	Cytoplasm	other
RPS6	ribosomal protein S6	ENSG00000137154	1213	7890	5643	4694	4860	Cytoplasm	other
RPS7	ribosomal protein S7	ENSG00000171863	293	1181	1157	1503	1033.5	Cytoplasm	other
RPS8	ribosomal protein S8	ENSG00000142937	730	614	325	793	615.5	Cytoplasm	other
RPS9	ribosomal protein S9	ENSG00000170889	307	658	356	1869	797.5	Cytoplasm	translation regulator
RPSA	ribosomal protein SA	ENSG00000168028	108	1225	1995	443	942.75	Cytoplasm	translation regulator
RSL24D1	ribosomal L24 domain containing 1	ENSG00000137876	425	1637	2868	1043	1493.25	Nucleus	other
RSRC1	arginine and serine rich coiled-coil 1	ENSG00000174891	1639	2527	549	1568	1570.75	Nucleus	other
RSU1	Ras suppressor protein 1	ENSG00000148484	885	1349	3954	878	1766.5	Cytoplasm	other
RTFDC1	replication termination factor 2 domain containing 1	ENSG00000022277	440	469	48	1490	611.75	Other	other
S100A11	S100 calcium binding protein A11	ENSG00000163191	156	1740	184	4665	1686.25	Cytoplasm	other
S100A4	S100 calcium binding protein A4	ENSG00000196154	280	628	1632	3059	1399.75	Cytoplasm	other
S100A6	S100 calcium binding protein A6	ENSG00000197956	109	808	352	2108	844.25	Cytoplasm	transporter
S100A8	S100 calcium binding protein A8	ENSG00000143546	2865	8142	4777	21131	9228.75	Cytoplasm	other
S100A9	S100 calcium binding protein A9	ENSG00000163220	2539	8371	2317	24530	9439.25	Cytoplasm	other
SAMD9	sterile alpha motif domain containing 9	ENSG00000205413	2230	2591	3766	1362	2487.25	Cytoplasm	other
SAP18	Sin3A associated protein 18	ENSG00000150459	1692	1508	796	3376	1843	Nucleus	transcription regulator
SAT1	spermidine/spermine N1-acetyltransferase 1	ENSG00000130066	1187	15159	386	13237	7492.25	Cytoplasm	enzyme
SCLT1	sodium channel and clathrin linker 1	ENSG00000151466	57	4657	869	582	1541.25	Plasma Membrane	transporter
SEC14L1	SEC14 like lipid binding 1	ENSG00000129657	441	68	578	3921	1252	Cytoplasm	transporter
SEC14L3	SEC14 like lipid binding 3	ENSG00000100012	181	43	495	287	251.5	Extracellular Space	transporter
SEC61G	Sec61 translocon gamma subunit	ENSG00000132432	291	171	333	174	242.25	Plasma Membrane	transporter
SEC62	SEC62 homolog, preprotein translocation factor	ENSG00000008952	30502	49550	47988	49145	44296.2	Cytoplasm	transporter
SECISBP2	SECIS binding protein 2	ENSG00000187742	615	48	195	1940	699.5	Cytoplasm	translation regulator
SELENBP1	selenium binding protein 1	ENSG00000143416	7314	2029	5857	2656	4464	Cytoplasm	other
SELK	selenoprotein K	ENSG00000113811	7091	7984	9206	3490	6942.75	Cytoplasm	other
SERF2	small EDRK-rich factor 2	ENSG00000140264	12841	17367	31982	20558	20687	Other	other
SERINC3	serine incorporator 3	ENSG00000132824	3205	7710	4288	7978	5795.25	Cytoplasm	transporter
SH3BGRL	SH3 domain binding glutamate rich protein like	ENSG00000131171	5211	5489	8118	2886	5426	Cytoplasm	other
SH3BGRL3	SH3 domain binding glutamate rich protein like 3	ENSG00000142669	40	1141	173	2159	878.25	Nucleus	other
SHOC2	SHOC2, leucine rich repeat scaffold protein	ENSG00000108061	1028	638	669	318	663.25	Cytoplasm	other
SIAH2	siah E3 ubiquitin protein ligase 2	ENSG00000181788	328	6	185	220	184.75	Nucleus	transcription regulator
SKP1	S-phase kinase-associated protein 1	ENSG00000113558	3437	6590	14124	8377	8132	Nucleus	transcription regulator
SLC14A1	solute carrier family 14 member 1 (Kidd blood group)	ENSG00000141469	7664	8330	10155	5324	7868.25	Plasma Membrane	transporter
SLC25A37	solute carrier family 25 member 37	ENSG00000147454	7517	18970	8064	19652	13550.8	Cytoplasm	transporter
SLC25A39	solute carrier family 25 member 39	ENSG00000013306	693	6215	1911	9457	4569	Cytoplasm	other
SLC2A1	solute carrier family 2 member 1	ENSG00000117394	243	1178	352	106	469.75	Plasma Membrane	transporter
SLC38A5	solute carrier family 38 member 5	ENSG00000017483	1031	284	105	1345	691.25	Plasma Membrane	transporter
SLC48A1	solute carrier family 48 member 1	ENSG00000211584	59	87	94	437	169.25	Other	other
SLC4A1	solute carrier family 4 member 1 (Diego blood group)	ENSG00000004939	2469	4346	2736	6729	4070	Plasma Membrane	transporter
SLF1	SMC5-SMC6 complex localization factor 1	ENSG00000133302	561	7	1196	1703	866.75	Nucleus	transcription regulator
SLTM	SAFB like transcription modulator	ENSG00000137776	829	716	790	3424	1439.75	Nucleus	other
SLU7	SLU7 homolog, splicing factor	ENSG00000164609	1047	1123	1928	2926	1756	Nucleus	enzyme
SMC4	structural maintenance of chromosomes 4	ENSG00000113810	219	1672	2005	777	1168.25	Nucleus	transporter
SMIM24	small integral membrane protein 24 [Source:HGNC Symbol	ENSG00000095932	1465	3626	410	2182	1920.75
SNCA	synuclein alpha	ENSG00000145335	4875	13262	6856	9278	8567.75	Cytoplasm	enzyme
SNHG9	small nucleolar RNA host gene 9	ENSG00000255198	19	70	12	26	31.75	Other	other
SNRNP27	small nuclear ribonucleoprotein U4/U6.U5 subunit 27	ENSG00000124380	179	224	154	6	140.75	Nucleus	other
SNRPD2	small nuclear ribonucleoprotein D2 polypeptide	ENSG00000125743	189	811	455	687	535.5	Nucleus	other
SOD2	superoxide dismutase 2 [Source:HGNC Symbol	ENSG00000112096	168	2011	10	5020	1802.25
SOX6	SRY-box 6	ENSG00000110693	2216	5260	2411	2849	3184	Nucleus	transcription regulator
SP100	SP100 nuclear antigen	ENSG00000067066	1528	1941	16	2588	1518.25	Nucleus	transcription regulator
SPECC1	sperm antigen with calponin homology and coiled-coil domains 1	ENSG00000128487	8	507	624	1909	762	Nucleus	other
SREK1IP1	SREK1 interacting protein 1	ENSG00000153006	217	475	733	1071	624	Other	other
SRGN	serglycin	ENSG00000122862	950	7335	1450	7957	4423	Cytoplasm	other
SRP14	signal recognition particle 14	ENSG00000140319	310	1347	970	2000	1156.75	Cytoplasm	other
SRP9	signal recognition particle 9	ENSG00000143742	374	3150	1353	837	1428.5	Cytoplasm	other
SSB	Sjogren syndrome antigen B	ENSG00000138385	885	1383	1689	1105	1265.5	Nucleus	enzyme
ST13	suppression of tumorigenicity 13 (colon carcinoma) (Hsp70 interacting protein)	ENSG00000100380	1480	9889	4051	4249	4917.25	Cytoplasm	other
ST3GAL1	ST3 beta-galactoside alpha-2,3-sialyltransferase 1	ENSG00000008513	551	1732	18	674	743.75	Cytoplasm	enzyme
STAG2	stromal antigen 2	ENSG00000101972	305	737	542	1051	658.75	Nucleus	transcription regulator
STAU1	staufen double-stranded RNA binding protein 1	ENSG00000124214	182	1694	406	867	787.25	Cytoplasm	transporter
STOM	stomatin	ENSG00000148175	7896	14006	1812	5421	7283.75	Plasma Membrane	other
STRADB	STE20-related kinase adaptor beta	ENSG00000082146	2017	1332	4833	329	2127.75	Cytoplasm	kinase
SUB1	SUB1 homolog, transcriptional regulator	ENSG00000113387	61	4555	175	1817	1652	Nucleus	transcription regulator
SUCO	SUN domain containing ossification factor	ENSG00000094975	148	2012	955	177	823	Other	other
SUDS3	SDS3 homolog, SIN3A corepressor complex component	ENSG00000111707	290	480	674	517	490.25	Nucleus	enzyme
SUMO1	small ubiquitin-like modifier 1	ENSG00000116030	872	797	279	1928	969	Nucleus	enzyme
SWT1	SWT1, RNA endoribonuclease homolog	ENSG00000116668	735	298	396	1922	837.75	Extracellular Space	other
SYF2	SYF2 pre-mRNA splicing factor	ENSG00000117614	169	269	352	680	367.5	Nucleus	other
TAGLN2	transgelin 2	ENSG00000158710	1479	4333	1049	4209	2767.5	Cytoplasm	other
TALDO1	transaldolase 1	ENSG00000177156	394	732	972	3399	1374.25	Cytoplasm	enzyme
TANGO2	transport and golgi organization 2 homolog	ENSG00000183597	489	408	304	1131	583	Cytoplasm	other
TANK	TRAF family member associated NFKB activator	ENSG00000136560	2197	934	1367	9614	3528	Cytoplasm	other
TAX1BP1	Tax1 binding protein 1	ENSG00000106052	11962	14243	14344	20251	15200	Cytoplasm	other
TBC1D22B	TBC1 domain family member 22B	ENSG00000065491	311	441	385	914	512.75	Other	other
TBCEL	tubulin folding cofactor E like	ENSG00000154114	1616	1822	3072	2376	2221.5	Other	other
TBL1XR1	transducin (beta)-like 1 X-linked receptor 1	ENSG00000177565	378	1090	315	6	447.25	Nucleus	transcription regulator
TBPL1	TATA-box binding protein like 1	ENSG00000028839	1934	2121	367	2849	1817.75	Nucleus	transcription regulator
TCEA1	transcription elongation factor A1	ENSG00000187735	114	1028	19	491	413	Nucleus	transcription regulator
TCEB2	transcription elongation factor B subunit 2	ENSG00000103363	1368	2389	791	3020	1892	Nucleus	transcription regulator
TCF4	transcription factor 4	ENSG00000196628	8	13	15	17	13.25	Nucleus	transcription regulator
TCP11L2	t-complex 11 like 2	ENSG00000166046	6114	12999	6357	3592	7265.5	Other	other
TESC	tescalcin	ENSG00000088992	52	269	31	123	118.75	Cytoplasm	other
TFDP2	transcription factor Dp-2	ENSG00000114126	944	1388	2525	4477	2333.5	Nucleus	transcription regulator
THRAP3	thyroid hormone receptor associated protein 3	ENSG00000054118	278	1475	2828	6063	2661	Nucleus	transcription regulator
TMA7	translation machinery associated 7 homolog [Source:HGNC Symbol	ENSG00000232112	676	998	689	758	780.25
TMBIM1	transmembrane BAX inhibitor motif containing 1	ENSG00000135926	254	330	755	1335	668.5	Cytoplasm	other
TMBIM6	transmembrane BAX inhibitor motif containing 6	ENSG00000139644	3248	3375	2353	3771	3186.75	Nucleus	other
TMEM14B	transmembrane protein 14B	ENSG00000137210	132	868	180	151	332.75	Other	other
TMEM56	transmembrane protein 56 [Source:HGNC Symbol	ENSG00000152078	8	5	712	267	248
TMEM59	transmembrane protein 59	ENSG00000116209	1942	2620	477	3616	2163.75	Plasma Membrane	peptidase
TMSB10	thymosin beta 10 [Source:HGNC Symbol	ENSG00000034510	894	2798	1708	2893	2073.25
TMSB10/TMSB4X	thymosin beta 10	ENSG00000205542	6531	29941	22325	37477	24068.5	Cytoplasm	other
TMSB4XP4	thymosin beta 4, X-linked pseudogene 4 [Source:HGNC Symbol	ENSG00000223551	8	17	11	37	18.25
TMSB4XP8	thymosin beta 4, X-linked pseudogene 8 [Source:HGNC Symbol	ENSG00000187653	15	113	33	61	55.5
TNS1	tensin 1	ENSG00000079308	792	287	1274	344	674.25	Plasma Membrane	other
TOMM7	translocase of outer mitochondrial membrane 7	ENSG00000196683	151	1276	222	1491	785	Cytoplasm	transporter
TOP1	topoisomerase (DNA) I	ENSG00000198900	1111	1678	1825	1891	1626.25	Nucleus	enzyme
TPGS2	tubulin polyglutamylase complex subunit 2	ENSG00000134779	949	268	741	61	504.75	Nucleus	other
TPI1	triosephosphate isomerase 1	ENSG00000111669	507	444	1247	1271	867.25	Cytoplasm	enzyme
TPM3	tropomyosin 3	ENSG00000143549	529	3729	196	4867	2330.25	Cytoplasm	other
TPT1	tumor protein, translationally-controlled 1	ENSG00000133112	3605	10924	4389	8607	6881.25	Cytoplasm	other
TRA2B	transformer 2 beta homolog (Drosophila)	ENSG00000136527	414	344	463	1088	577.25	Nucleus	other
TRAK2	trafficking kinesin protein 2	ENSG00000115993	2355	2352	4305	9970	4745.5	Plasma Membrane	transporter
TRAPPC1	trafficking protein particle complex 1	ENSG00000170043	22	250	195	248	178.75	Cytoplasm	other
TRBC1	T cell receptor beta constant 1 [Source:HGNC Symbol	ENSG00000211751	168	1133	105	5	352.75
TRBC2	T cell receptor beta constant 2 [Source:HGNC Symbol	ENSG00000211772	270	1026	237	255	447
TRIM23	tripartite motif containing 23	ENSG00000113595	2431	6772	4600	15103	7226.5	Nucleus	enzyme
TRIM58	tripartite motif containing 58	ENSG00000162722	1266	4885	3251	2541	2985.75	Other	other
TRIP12	thyroid hormone receptor interactor 12	ENSG00000153827	807	2583	2818	56	1566	Cytoplasm	enzyme
TROVE2	TROVE domain family member 2	ENSG00000116747	874	2478	779	1834	1491.25	Nucleus	other
TSGA10	testis specific 10	ENSG00000135951	38	794	441	1143	604	Cytoplasm	other
TSPAN5	tetraspanin 5	ENSG00000168785	190	2434	897	2112	1408.25	Plasma Membrane	other
TSTA3	tissue specific transplantation antigen P35B	ENSG00000104522	191	1280	161	1357	747.25	Plasma Membrane	enzyme
TTC1	tetratricopeptide repeat domain 1	ENSG00000113312	92	847	235	279	363.25	Cytoplasm	other
TUBA1A	tubulin alpha 1a	ENSG00000167552	437	669	494	6	401.5	Cytoplasm	other
TUBA1B	tubulin alpha 1b	ENSG00000123416	64	749	245	612	417.5	Cytoplasm	other
TUBA4A	tubulin alpha 4a	ENSG00000127824	432	1419	186	1897	983.5	Cytoplasm	other
TXN	thioredoxin	ENSG00000136810	110	291	230	1550	545.25	Cytoplasm	enzyme
TXNDC16	thioredoxin domain containing 16	ENSG00000087301	281	24	677	174	289	Extracellular Space	enzyme
TXNIP	thioredoxin interacting protein	ENSG00000265972	2535	15497	6396	5704	7533	Cytoplasm	other
TYROBP	TYRO protein tyrosine kinase binding protein	ENSG00000011600	94	508	38	2894	883.5	Plasma Membrane	transmembrane receptor
UBA52	ubiquitin A-52 residue ribosomal protein fusion product 1	ENSG00000221983	18246	31400	40481	22511	28159.5	Cytoplasm	enzyme
UBB	ubiquitin B	ENSG00000170315	30724	47677	99978	19911	49572.5	Cytoplasm	enzyme
UBBP4	ubiquitin B pseudogene 4	ENSG00000263563	219	257	547	153	294	Other	other
UBC	ubiquitin C	ENSG00000150991	1784	8821	4072	7705	5595.5	Cytoplasm	enzyme
UBE2B	ubiquitin conjugating enzyme E2 B	ENSG00000119048	777	829	1493	1516	1153.75	Cytoplasm	enzyme
UBE2D3	ubiquitin conjugating enzyme E2 D3	ENSG00000109332	1683	5448	2525	7000	4164	Cytoplasm	enzyme
UBE2H	ubiquitin conjugating enzyme E2 H	ENSG00000186591	599	1119	2272	1831	1455.25	Other	enzyme
UBE2V1P2	ubiquitin conjugating enzyme E2 V1 pseudogene 2 [Source:HGNC Symbol	ENSG00000214192	7	7	8	11	8.25
UBL7	ubiquitin like 7	ENSG00000138629	438	1527	591	1965	1130.25	Other	other
UBR2	ubiquitin protein ligase E3 component n-recognin 2	ENSG00000024048	364	2472	412	55	825.75	Nucleus	enzyme
UBXN4	UBX domain protein 4	ENSG00000144224	105	34	722	171	258	Extracellular Space	other
UBXN6	UBX domain protein 6	ENSG00000167671	36	149	34	273	123	Cytoplasm	other
UCP2	uncoupling protein 2	ENSG00000175567	5	154	284	512	238.75	Cytoplasm	transporter
UPF2	UPF2 regulator of nonsense transcripts homolog (yeast)	ENSG00000151461	67	366	535	190	289.5	Cytoplasm	other
UQCR11	ubiquinol-cytochrome c reductase, complex III subunit XI	ENSG00000127540	81	189	58	517	211.25	Cytoplasm	enzyme
UQCRB	ubiquinol-cytochrome c reductase binding protein	ENSG00000156467	1364	1018	1508	3391	1820.25	Cytoplasm	enzyme
UQCRH	ubiquinol-cytochrome c reductase hinge protein	ENSG00000173660	125	779	935	1390	807.25	Cytoplasm	enzyme
UQCRQ	ubiquinol-cytochrome c reductase complex III subunit VII	ENSG00000164405	24	111	91	218	111	Cytoplasm	enzyme
USP10	ubiquitin specific peptidase 10	ENSG00000103194	436	3847	881	1363	1631.75	Cytoplasm	peptidase
USP12	ubiquitin specific peptidase 12	ENSG00000152484	744	709	218	288	489.75	Cytoplasm	peptidase
USP15	ubiquitin specific peptidase 15	ENSG00000135655	11410	17308	10115	3233	10516.5	Cytoplasm	peptidase
USP20	ubiquitin specific peptidase 20	ENSG00000136878	90	116	14	318	134.5	Cytoplasm	peptidase
USP32	ubiquitin specific peptidase 32	ENSG00000170832	289	322	429	182	305.5	Cytoplasm	other
USP34	ubiquitin specific peptidase 34	ENSG00000115464	2152	4336	1261	2121	2467.5	Extracellular Space	peptidase
UXT	ubiquitously expressed prefoldin like chaperone	ENSG00000126756	167	193	153	157	167.5	Cytoplasm	transcription regulator
WBP2	WW domain binding protein 2	ENSG00000132471	92	861	106	118	294.25	Cytoplasm	other
WBP4	WW domain binding protein 4	ENSG00000120688	172	775	368	635	487.5	Cytoplasm	other
WBSCR22	Williams-Beuren syndrome chromosome region 22	ENSG00000071462	258	309	179	686	358	Nucleus	enzyme
WDR45	WD repeat domain 45	ENSG00000196998	245	388	240	3278	1037.75	Other	other
WNK1	WNK lysine deficient protein kinase 1	ENSG00000060237	353	3256	1770	1250	1657.25	Cytoplasm	kinase
VPS13B	vacuolar protein sorting 13 homolog B	ENSG00000132549	370	765	294	1238	666.75	Nucleus	transporter
VPS28	VPS28, ESCRT-I subunit	ENSG00000160948	44	1572	39	1133	697	Cytoplasm	transporter
VRK1	vaccinia related kinase 1	ENSG00000100749	10	1776	1023	486	823.75	Nucleus	kinase
XPO7	exportin 7	ENSG00000130227	333	1849	642	1602	1106.5	Nucleus	transporter
XRN1	5'-3' exoribonuclease 1	ENSG00000114127	337	3832	5730	7741	4410	Cytoplasm	enzyme
YBX1	Y-box binding protein 1	ENSG00000065978	2418	3647	4470	1263	2949.5	Nucleus	transcription regulator
YBX3	Y-box binding protein 3	ENSG00000060138	3957	6695	3237	2597	4121.5	Nucleus	transcription regulator
YIPF6	Yip1 domain family member 6	ENSG00000181704	16343	35635	43947	49941	36466.5	Cytoplasm	other
YOD1	YOD1 deubiquitinase	ENSG00000180667	2338	1213	2294	2730	2143.75	Other	enzyme
YPEL5	yippee like 5	ENSG00000119801	628	6562	611	3740	2885.25	Nucleus	other
YWHAZ	tyrosine 3-monooxygenase/tryptophan 5-monooxygenase activation protein zeta	ENSG00000164924	1394	4778	1397	12079	4912	Cytoplasm	enzyme
ZC3H6	zinc finger CCCH-type containing 6	ENSG00000188177	1681	631	2221	2169	1675.5	Other	other
ZC3HAV1	zinc finger CCCH-type containing, antiviral 1	ENSG00000105939	20	249	158	896	330.75	Plasma Membrane	other
ZMAT2	zinc finger matrin-type 2	ENSG00000146007	1941	4602	5697	6066	4576.5	Nucleus	other
ZNF148	zinc finger protein 148	ENSG00000163848	1503	437	99	1664	925.75	Nucleus	transcription regulator
ZNF271P	zinc finger protein 271, pseudogene	ENSG00000257267	26	61	1205	89	345.25	Nucleus	other
	Ensembl gene ENSG00000277048 is no longer in the database but it has been mapped to 1 deprecated identifier.	ENSG00000277048	68	292	193	313	216.5

## Sheet: Supplementary Table 4
Supplementary Table S4. Estimates for transcript abundances in RBCs (n = 4), reported as transcripts per million (TPM), were produced by Kallisto algorithm.
RBC1					RBC2					RBC3					RBC4
target_id	length	eff_length	est_counts	tpm	target_id	length	eff_length	est_counts	tpm	target_id	length	eff_length	est_counts	tpm	target_id	length	eff_length	est_counts	tpm
ENST00000456328	1657	1457.39	0	0	ENST00000456328	1657	1479.53	0	0	ENST00000456328	1657	1471.97	0	0	ENST00000456328	1657	1499.45	0	0
ENST00000450305	632	436.429	0	0	ENST00000450305	632	457.009	0	0	ENST00000450305	632	450.033	0	0	ENST00000450305	632	475.816	0	0
ENST00000488147	1351	1151.39	1.81227	0.0209877	ENST00000488147	1351	1173.53	0	0	ENST00000488147	1351	1165.97	0	0	ENST00000488147	1351	1193.45	0	0
ENST00000619216	68	26.0919	0	0	ENST00000619216	68	26.8191	0	0	ENST00000619216	68	22.8382	0	0	ENST00000619216	68	20.7786	0	0
ENST00000473358	712	514.297	0	0	ENST00000473358	712	536.041	0	0	ENST00000473358	712	528.381	0	0	ENST00000473358	712	555.21	0	0
ENST00000469289	535	344.593	0	0	ENST00000469289	535	363.555	0	0	ENST00000469289	535	357.21	0	0	ENST00000469289	535	380.835	0	0
ENST00000607096	138	62.7786	0	0	ENST00000607096	138	66.4765	0	0	ENST00000607096	138	60.4442	0	0	ENST00000607096	138	56.5407	0	0
ENST00000417324	1187	987.389	0.123456	0.0016672	ENST00000417324	1187	1009.53	0	0	ENST00000417324	1187	1001.97	0	0	ENST00000417324	1187	1029.45	0	0
ENST00000461467	590	395.73	0	0	ENST00000461467	590	416.448	0	0	ENST00000461467	590	409.022	0	0	ENST00000461467	590	434.271	0	0
ENST00000606857	840	641.384	0	0	ENST00000606857	840	663.024	0	0	ENST00000606857	840	655.246	0	0	ENST00000606857	840	682.832	0	0
ENST00000492842	940	740.85	0	0	ENST00000492842	940	762.527	0	0	ENST00000492842	940	754.97	0	0	ENST00000492842	940	782.616	0	0
ENST00000335137	918	718.85	0	0	ENST00000335137	918	740.602	0	0	ENST00000335137	918	732.97	0	0	ENST00000335137	918	760.616	0	0
ENST00000466430	2748	2548.39	0	0	ENST00000466430	2748	2570.53	0	0	ENST00000466430	2748	2562.97	0	0	ENST00000466430	2748	2590.45	0	0
ENST00000477740	491	305.025	0	0	ENST00000477740	491	322.432	0	0	ENST00000477740	491	317.983	0	0	ENST00000477740	491	338.572	0	0
ENST00000471248	629	433.517	0	0	ENST00000471248	629	454.146	0	0	ENST00000471248	629	447.169	0	0	ENST00000471248	629	472.864	0	0
ENST00000610542	723	525.297	0	0	ENST00000610542	723	546.66	0	0	ENST00000610542	723	539.114	0	0	ENST00000610542	723	566.21	0	0
ENST00000453576	336	179.68	0	0	ENST00000453576	336	191.719	0	0	ENST00000453576	336	192.884	0	0	ENST00000453576	336	198.736	0	0
ENST00000495576	1319	1119.39	0	0	ENST00000495576	1319	1141.53	0	0	ENST00000495576	1319	1133.97	0	0	ENST00000495576	1319	1161.45	0	0
ENST00000442987	3812	3612.39	0	0	ENST00000442987	3812	3634.53	0	0	ENST00000442987	3812	3626.97	2.46225	0.0070064	ENST00000442987	3812	3654.45	1.09282	0.00309061
ENST00000494149	755	556.921	0	0	ENST00000494149	755	578.21	0	0	ENST00000494149	755	570.784	0	0	ENST00000494149	755	598.151	0	0
ENST00000595919	284	145.004	0	0	ENST00000595919	284	155.551	0	0	ENST00000595919	284	154.859	0	0	ENST00000595919	284	156.344	0	0
ENST00000493797	323	170.834	0	0	ENST00000493797	323	182.297	0	0	ENST00000493797	323	183.007	0	0	ENST00000493797	323	187.756	0	0
ENST00000484859	4860	4660.39	0	0	ENST00000484859	4860	4682.53	0	0	ENST00000484859	4860	4674.97	0	0	ENST00000484859	4860	4702.45	0	0
ENST00000490997	518	328.935	0	0	ENST00000490997	518	347.525	0	0	ENST00000490997	518	341.922	0	0	ENST00000490997	518	364.364	0	0
ENST00000466557	1301	1101.39	0	0	ENST00000466557	1301	1123.53	0	0	ENST00000466557	1301	1115.97	0	0	ENST00000466557	1301	1143.45	0	0
ENST00000491962	278	141.523	0	0	ENST00000491962	278	151.652	0	0	ENST00000491962	278	150.62	0	0	ENST00000491962	278	151.392	0	0
ENST00000410691	104	40.0028	0	0	ENST00000410691	104	41.2571	0	0	ENST00000410691	104	35.2508	0	0	ENST00000410691	104	33.5509	0	0
ENST00000496488	457	275.057	0	0	ENST00000496488	457	292.15	0	0	ENST00000496488	457	288.488	0	0	ENST00000496488	457	306.527	0	0
ENST00000624431	718	520.297	0	0	ENST00000624431	718	541.987	0	0	ENST00000624431	718	534.275	0	0	ENST00000624431	718	561.21	0	0
ENST00000623834	1374	1174.39	0	0	ENST00000623834	1374	1196.53	0	0	ENST00000623834	1374	1188.97	0	0	ENST00000623834	1374	1216.45	0	0
ENST00000623083	1687	1487.39	9.18773	0.0823661	ENST00000623083	1687	1509.53	0	0	ENST00000623083	1687	1501.97	0	0	ENST00000623083	1687	1529.45	0	0
ENST00000624735	1604	1404.39	0	0	ENST00000624735	1604	1426.53	0	0	ENST00000624735	1604	1418.97	2	0.0145467	ENST00000624735	1604	1446.45	0	0
ENST00000612080	68	26.0919	0	0	ENST00000612080	68	26.8191	0	0	ENST00000612080	68	22.8382	0	0	ENST00000612080	68	20.7786	0	0
ENST00000611868	138	62.7786	0	0	ENST00000611868	138	66.4765	0	0	ENST00000611868	138	60.4442	0	0	ENST00000611868	138	56.5407	0	0
ENST00000442116	1292	1092.39	0	0	ENST00000442116	1292	1114.53	0	0	ENST00000442116	1292	1106.97	0	0	ENST00000442116	1292	1134.45	0	0
ENST00000448958	1925	1725.39	0	0	ENST00000448958	1925	1747.53	0	0	ENST00000448958	1925	1739.97	0	0	ENST00000448958	1925	1767.45	0	0
ENST00000634344	1219	1019.39	0	0	ENST00000634344	1219	1041.53	0	0	ENST00000634344	1219	1033.97	0	0	ENST00000634344	1219	1061.45	0	0
ENST00000424587	2257	2057.39	0	0	ENST00000424587	2257	2079.53	0	0	ENST00000424587	2257	2071.97	0	0	ENST00000424587	2257	2099.45	0	0
ENST00000335577	510	321.936	0	0	ENST00000335577	510	340.188	0	0	ENST00000335577	510	334.578	0	0	ENST00000335577	510	356.69	0	0
ENST00000450734	457	275.057	0	0	ENST00000450734	457	292.15	0	0	ENST00000450734	457	288.488	0	0	ENST00000450734	457	306.527	0	0
ENST00000458203	385	217.064	1001528	0.151375	ENST00000458203	385	229.976	0	0	ENST00000458203	385	231.679	0	0	ENST00000458203	385	241.164	0	0
ENST00000441866	676	479.244	0	0	ENST00000441866	676	500.247	0	0	ENST00000441866	676	492.996	0	0	ENST00000441866	676	519.319	0	0
ENST00000450983	607	412.241	0	0	ENST00000450983	607	432.685	0	0	ENST00000450983	607	425.518	0	0	ENST00000450983	607	451.14	0	0
ENST00000412666	426	249.389	0	0	ENST00000412666	426	264.803	0	0	ENST00000412666	426	263.531	0	0	ENST00000412666	426	278.176	0	0
ENST00000635159	994	794.389	0	0	ENST00000635159	994	816.527	0	0	ENST00000635159	994	808.97	0	0	ENST00000635159	994	836.452	0	0
ENST00000431321	406	233.245	0	0	ENST00000431321	406	247.566	0	0	ENST00000431321	406	247.696	0	0	ENST00000431321	406	259.836	0	0
ENST00000453935	498	311.008	0	0	ENST00000453935	498	328.934	0	0	ENST00000453935	498	323.894	0	0	ENST00000453935	498	345.434	0	0
ENST00000440163	462	279.36	0	0	ENST00000440163	462	296.392	0	0	ENST00000440163	462	292.941	0	0	ENST00000440163	462	311.182	0	0
ENST00000455207	413	239.143	0	0	ENST00000455207	413	253.35	0	0	ENST00000455207	413	253.53	0	0	ENST00000455207	413	266.24	0	0
ENST00000455464	735	537.032	0	0	ENST00000455464	735	558.549	0	0	ENST00000455464	735	550.841	0	0	ENST00000455464	735	578.21	0	0
ENST00000613471	723	525.297	0	0	ENST00000613471	723	546.66	0	0	ENST00000613471	723	539.114	0	0	ENST00000613471	723	566.21	0	0
ENST00000601814	635	439.253	0	0	ENST00000601814	635	459.963	0	0	ENST00000601814	635	453.033	0	0	ENST00000601814	635	478.721	0	0
ENST00000431812	336	179.68	0	0	ENST00000431812	336	191.719	0	0	ENST00000431812	336	192.884	0	0	ENST00000431812	336	198.736	0	0
ENST00000419160	607	412.241	0	0	ENST00000419160	607	432.685	0	0	ENST00000419160	607	425.518	0	0	ENST00000419160	607	451.14	0	0
ENST00000440038	746	548.032	0	0	ENST00000440038	746	569.21	0	0	ENST00000440038	746	561.841	0	0	ENST00000440038	746	589.151	0	0
ENST00000423728	573	379.828	0	0	ENST00000423728	573	400.022	0	0	ENST00000423728	573	392.749	0	0	ENST00000423728	573	417.484	0	0
ENST00000599771	457	275.057	0	0	ENST00000599771	457	292.15	0	0	ENST00000599771	457	288.488	0	0	ENST00000599771	457	306.527	0	0
ENST00000601486	696	498.756	0	0	ENST00000601486	696	520.094	0	0	ENST00000601486	696	512.696	0	0	ENST00000601486	696	539.319	0	0
ENST00000616947	603	408.406	0	0	ENST00000616947	603	428.772	0	0	ENST00000616947	603	421.688	0	0	ENST00000616947	603	447.14	0	0
ENST00000616311	372	207.026	0	0	ENST00000616311	372	219.401	0	0	ENST00000616311	372	221.231	0	0	ENST00000616311	372	230.085	0	0
ENST00000432964	575	381.635	0	0	ENST00000432964	575	401.942	0	0	ENST00000432964	575	394.709	0	0	ENST00000432964	575	419.484	0	0
ENST00000608420	438	259.281	0	0	ENST00000608420	438	275.317	0	0	ENST00000608420	438	273.022	0	0	ENST00000608420	438	288.926	0	0
ENST00000437905	363	200.01	0	0	ENST00000437905	363	212.373	0	0	ENST00000437905	363	213.965	0	0	ENST00000437905	363	221.917	0	0
ENST00000426406	939	739.85	0	0	ENST00000426406	939	761.527	0	0	ENST00000426406	939	753.97	0	0	ENST00000426406	939	781.616	0	0
ENST00000445840	183	89.1854	0	0	ENST00000445840	183	95.854	0	0	ENST00000445840	183	89.2807	0	0	ENST00000445840	183	83.9901	0	0
ENST00000432723	2477	2277.39	0	0	ENST00000432723	2477	2299.53	0	0	ENST00000432723	2477	2291.97	0	0	ENST00000432723	2477	2319.45	0	0
ENST00000514436	1239	1039.39	0	0	ENST00000514436	1239	1061.53	0	0	ENST00000514436	1239	1053.97	0	0	ENST00000514436	1239	1081.45	0	0
ENST00000614007	104	40.0028	0	0	ENST00000614007	104	41.2571	0	0	ENST00000614007	104	35.2508	0	0	ENST00000614007	104	33.5509	0	0
ENST00000417636	842	643.384	0	0	ENST00000417636	842	665.024	0	0	ENST00000417636	842	657.246	0	0	ENST00000417636	842	684.832	0	0
ENST00000634833	1004	804.389	0	0	ENST00000634833	1004	826.527	0	0	ENST00000634833	1004	818.97	0	0	ENST00000634833	1004	846.452	0	0
ENST00000635509	940	740.85	0	0	ENST00000635509	940	762.527	0	0	ENST00000635509	940	754.97	0	0	ENST00000635509	940	782.616	0	0
ENST00000634337	890	690.92	0	0	ENST00000634337	890	712.749	0	0	ENST00000634337	890	705.04	0	0	ENST00000634337	890	732.692	0	0
ENST00000440196	439	259.978	0	0	ENST00000440196	439	276.117	0	0	ENST00000440196	439	273.848	0	0	ENST00000440196	439	289.837	0	0
ENST00000357876	498	311.008	0	0	ENST00000357876	498	328.934	0	0	ENST00000357876	498	323.894	0	0	ENST00000357876	498	345.434	0	0
ENST00000440200	413	239.143	0	0	ENST00000440200	413	253.35	0	0	ENST00000440200	413	253.53	0	0	ENST00000440200	413	266.24	0	0
ENST00000452176	802	603.634	0	0	ENST00000452176	802	625.15	0	0	ENST00000452176	802	617.372	0	0	ENST00000452176	802	645.03	0	0
ENST00000441245	629	433.517	0	0	ENST00000441245	629	454.146	0	0	ENST00000441245	629	447.169	0	0	ENST00000441245	629	472.864	0	0
ENST00000419394	480	295.298	0	0	ENST00000419394	480	312.112	0	0	ENST00000419394	480	308.663	0	0	ENST00000419394	480	328.112	0	0
ENST00000414688	750	551.921	0	0	ENST00000414688	750	573.21	0	0	ENST00000414688	750	565.841	0	0	ENST00000414688	750	593.151	0	0
ENST00000616585	723	525.297	0	0	ENST00000616585	723	546.66	0	0	ENST00000616585	723	539.114	0	0	ENST00000616585	723	566.21	0	0
ENST00000447954	336	179.68	0	0	ENST00000447954	336	191.719	0	0	ENST00000447954	336	192.884	0	0	ENST00000447954	336	198.736	0	0
ENST00000423796	607	412.241	0	0	ENST00000423796	607	432.685	0	0	ENST00000423796	607	425.518	0	0	ENST00000423796	607	451.14	0	0
ENST00000450696	402	230.179	0	0	ENST00000450696	402	244.373	0	0	ENST00000450696	402	244.283	0	0	ENST00000450696	402	256.129	0	0
ENST00000416931	372	207.026	0	0	ENST00000416931	372	219.401	1	0.0475047	ENST00000416931	372	221.231	0	0	ENST00000416931	372	230.085	0	0
ENST00000457540	1044	844.389	0	0	ENST00000457540	1044	866.527	0	0	ENST00000457540	1044	858.97	0	0	ENST00000457540	1044	886.452	0	0
ENST00000617238	63	23.8282	0	0	ENST00000617238	63	24.6406	0	0	ENST00000617238	63	20.7526	0	0	ENST00000617238	63	19.0757	1	0.541795
ENST00000414273	1543	1343.39	0	0	ENST00000414273	1543	1365.53	0	0	ENST00000414273	1543	1357.97	0	0	ENST00000414273	1543	1385.45	1.18887	0.00886871
ENST00000621981	89	31.1958	0	0	ENST00000621981	89	32.9915	0	0	ENST00000621981	89	27.5193	0	0	ENST00000621981	89	26.1291	0	0
ENST00000427426	682	485.051	0	0	ENST00000427426	682	506.197	0	0	ENST00000427426	682	498.747	0	0	ENST00000427426	682	525.319	0	0
ENST00000467115	207	102.363	0	0	ENST00000467115	207	110.562	0	0	ENST00000467115	207	104.218	0	0	ENST00000467115	207	99.359	0	0
ENST00000514057	681	484.051	0	0	ENST00000514057	681	505.197	4.47059	0.0922314	ENST00000514057	681	497.847	1	0.0207305	ENST00000514057	681	524.319	19.25	0.379448
ENST00000416718	547	355.698	0	0	ENST00000416718	547	374.921	0	0	ENST00000416718	547	368.289	0	0	ENST00000416718	547	392.175	0	0
ENST00000438434	424	247.814	0	0	ENST00000438434	424	262.997	0	0	ENST00000438434	424	261.868	0	0	ENST00000438434	424	276.261	0	0
ENST00000332831	939	739.85	0	0	ENST00000332831	939	761.527	0	0	ENST00000332831	939	753.97	0	0	ENST00000332831	939	781.616	0	0
ENST00000440782	2455	2255.39	0	0	ENST00000440782	2455	2277.53	0	0	ENST00000440782	2455	2269.97	0	0	ENST00000440782	2455	2297.45	0	0
ENST00000506640	6432	6232.39	0	0	ENST00000506640	6432	6254.53	0	0	ENST00000506640	6432	6246.97	0	0	ENST00000506640	6432	6274.45	0	0
ENST00000428504	417	242.182	0	0	ENST00000428504	417	256.679	0	0	ENST00000428504	417	256.76	0	0	ENST00000428504	417	269.992	0	0
ENST00000411249	104	40.0028	0	0	ENST00000411249	104	41.2571	0	0	ENST00000411249	104	35.2508	0	0	ENST00000411249	104	33.5509	0	0
ENST00000422528	456	274.201	0	0	ENST00000422528	456	291.27	0	0	ENST00000422528	456	287.668	0	0	ENST00000422528	456	305.683	0	0
ENST00000434264	844	645.384	0	0	ENST00000434264	844	667.024	0	0	ENST00000434264	844	659.246	0	0	ENST00000434264	844	686.832	0	0
ENST00000457084	566	373.4	0	0	ENST00000457084	566	393.222	0	0	ENST00000457084	566	386.143	0	0	ENST00000457084	566	410.733	0	0
ENST00000589899	809	610.573	0	0	ENST00000589899	809	632.024	0	0	ENST00000589899	809	624.309	0	0	ENST00000589899	809	651.965	0	0
ENST00000609830	669	472.436	0	0	ENST00000609830	669	493.247	0	0	ENST00000609830	669	486.144	0	0	ENST00000609830	669	512.371	0	0
ENST00000429505	441	261.592	0	0	ENST00000429505	441	277.886	0	0	ENST00000429505	441	275.297	0	0	ENST00000429505	441	291.689	0	0
ENST00000585826	390	220.974	0	0	ENST00000585826	390	234.057	0	0	ENST00000585826	390	235.568	0	0	ENST00000585826	390	245.557	0	0
ENST00000592547	608	413.157	0	0	ENST00000592547	608	433.642	0	0	ENST00000592547	608	426.518	0	0	ENST00000592547	608	452.094	0	0
ENST00000586928	598	403.447	0	0	ENST00000586928	598	423.858	0	0	ENST00000586928	598	416.857	0	0	ENST00000586928	598	442.14	0	0
ENST00000585745	168	79.7326	0	0	ENST00000585745	168	86.2522	0	0	ENST00000585745	168	79.7882	0	0	ENST00000585745	168	74.5849	0	0
ENST00000585768	394	223.896	0	0	ENST00000585768	394	237.579	0	0	ENST00000585768	394	238.55	0	0	ENST00000585768	394	248.993	0	0
ENST00000590848	726	528.245	0	0	ENST00000590848	726	549.66	0	0	ENST00000590848	726	542.006	0	0	ENST00000590848	726	569.21	0	0
ENST00000591440	780	581.692	0	0	ENST00000591440	780	603.15	0	0	ENST00000591440	780	595.432	0	0	ENST00000591440	780	623.03	0	0
ENST00000587530	1024	824.389	0	0	ENST00000587530	1024	846.527	0	0	ENST00000587530	1024	838.97	0	0	ENST00000587530	1024	866.452	0	0
ENST00000593022	693	495.806	0	0	ENST00000593022	693	517.094	0	0	ENST00000593022	693	509.696	0	0	ENST00000593022	693	536.319	0	0
ENST00000589531	714	516.297	0	0	ENST00000589531	714	537.987	0	0	ENST00000589531	714	530.328	0	0	ENST00000589531	714	557.21	0	0
ENST00000588951	607	412.241	0	0	ENST00000588951	607	432.685	0	0	ENST00000588951	607	425.518	0	0	ENST00000588951	607	451.14	0	0
ENST00000586288	1040	840.389	0	0	ENST00000586288	1040	862.527	0	0	ENST00000586288	1040	854.97	0	0	ENST00000586288	1040	882.452	0	0
ENST00000591702	1873	1673.39	0	0	ENST00000591702	1873	1695.53	1.99736	0.012278	ENST00000591702	1873	1687.97	0	0	ENST00000591702	1873	1715.45	0	0
ENST00000443772	417	242.182	0	0	ENST00000443772	417	256.679	0	0	ENST00000443772	417	256.76	0	0	ENST00000443772	417	269.992	0	0
ENST00000412115	581	387.324	0	0	ENST00000412115	581	407.779	0	0	ENST00000412115	581	400.349	0	0	ENST00000412115	581	425.357	0	0
ENST00000447500	872	673.056	77.6926	1.53919	ENST00000447500	872	694.888	61.2904	0.919288	ENST00000447500	872	687.11	76.9005	1.15507	ENST00000447500	872	714.692	110.662	1.60029
ENST00000590817	238	118.62	45.9907	5.16983	ENST00000590817	238	128.006	74.4774	6.06412	ENST00000590817	238	124.201	30.9359	2.57065	ENST00000590817	238	120.527	101.028	8.66317
ENST00000326734	1947	1747.39	2	0.0152618	ENST00000326734	1947	1769.53	0	0	ENST00000326734	1947	1761.97	0	0	ENST00000326734	1947	1789.45	0	0
ENST00000624927	677	480.196	0	0	ENST00000624927	677	501.247	0	0	ENST00000624927	677	493.996	0	0	ENST00000624927	677	520.319	0	0
ENST00000623808	493	306.678	0	0	ENST00000623808	493	324.201	0	0	ENST00000623808	493	319.72	0	0	ENST00000623808	493	340.572	0	0
ENST00000445118	6606	6406.39	165.369	0.344196	ENST00000445118	6606	6428.53	335.387	0.543763	ENST00000445118	6606	6420.97	151.707	0.243843	ENST00000445118	6606	6448.45	361.045	0.578658
ENST00000448975	633	437.429	0	0	ENST00000448975	633	458.009	4.14745	0.0943804	ENST00000448975	633	451.033	0	0	ENST00000448975	633	476.816	0	0
ENST00000610067	550	358.662	1.17693	0.0437551	ENST00000610067	550	377.921	0	0	ENST00000610067	550	370.953	3.73725	0.103978	ENST00000610067	550	395.096	7.96803	0.208433
ENST00000608189	824	625.573	0	0	ENST00000608189	824	647.024	0	0	ENST00000608189	824	639.246	0	0	ENST00000608189	824	666.899	8.01162	0.124159
ENST00000441765	750	551.921	0	0	ENST00000441765	750	573.21	0	0	ENST00000441765	750	565.841	0	0	ENST00000441765	750	593.151	3.1081	0.0541559
ENST00000609139	455	273.23	0	0	ENST00000609139	455	290.33	0	0	ENST00000609139	455	286.758	0	0	ENST00000609139	455	304.714	2.06733	0.0701187
ENST00000449005	874	675.056	82.2352	1.62436	ENST00000449005	874	696.888	176.776	2.64383	ENST00000449005	874	689.11	65.0977	0.974954	ENST00000449005	874	716.692	129.05	1.86099
ENST00000416570	612	416.99	0	0	ENST00000416570	612	437.642	0	0	ENST00000416570	612	430.431	0	0	ENST00000416570	612	456.004	0	0
ENST00000623070	494	307.551	105313	0.226266	ENST00000623070	494	325.168	1.88904	0.0605492	ENST00000623070	494	320.523	980587	0.336753	ENST00000623070	494	341.503	2046394	0.355603
ENST00000609009	767	568.865	0	0	ENST00000609009	767	590.21	4.80094	0.0847802	ENST00000609009	767	582.668	0	0	ENST00000609009	767	610.091	0	0
ENST00000622921	724	526.245	0	0	ENST00000622921	724	547.66	0	0	ENST00000622921	724	540.114	0	0	ENST00000622921	724	567.21	0	0
ENST00000415295	894	694.92	0	0	ENST00000415295	894	716.749	0	0	ENST00000415295	894	708.97	0	0	ENST00000415295	894	736.692	0	0
ENST00000425657	845	646.384	0	0	ENST00000425657	845	668.024	0	0	ENST00000425657	845	660.246	0	0	ENST00000425657	845	687.832	0	0
ENST00000473798	1317	1117.39	0	0	ENST00000473798	1317	1139.53	0	0	ENST00000473798	1317	1131.97	0	0	ENST00000473798	1317	1159.45	0	0
ENST00000446136	1807	1607.39	0	0	ENST00000446136	1807	1629.53	0	0	ENST00000446136	1807	1621.97	0	0	ENST00000446136	1807	1649.45	0	0
ENST00000432963	504	316.46	0	0	ENST00000432963	504	334.495	0	0	ENST00000432963	504	329.189	0	0	ENST00000432963	504	351.118	0	0
ENST00000427857	446	265.674	0	0	ENST00000427857	446	282.218	0	0	ENST00000427857	446	279.449	0	0	ENST00000427857	446	296.298	0	0
ENST00000415481	1058	858.389	0	0	ENST00000415481	1058	880.527	0	0	ENST00000415481	1058	872.97	0	0	ENST00000415481	1058	900.452	0	0
ENST00000635557	837	638.384	0	0	ENST00000635557	837	660.024	0	0	ENST00000635557	837	652.246	0	0	ENST00000635557	837	679.832	0	0
ENST00000607769	351	191.095	0	0	ENST00000607769	351	202.831	0	0	ENST00000607769	351	204.533	0	0	ENST00000607769	351	211.411	0	0
ENST00000448179	3043	2843.39	0	0	ENST00000448179	3043	2865.53	0	0	ENST00000448179	3043	2857.97	0	0	ENST00000448179	3043	2885.45	0	0
ENST00000398216	443	263.176	0	0	ENST00000398216	443	279.597	0	0	ENST00000398216	443	276.977	0	0	ENST00000398216	443	293.569	0	0
ENST00000609207	4152	3952.39	0	0	ENST00000609207	4152	3974.53	0	0	ENST00000609207	4152	3966.97	0	0	ENST00000609207	4152	3994.45	0	0
ENST00000417705	1389	1189.39	0	0	ENST00000417705	1389	1211.53	0	0	ENST00000417705	1389	1203.97	0	0	ENST00000417705	1389	1231.45	0	0
ENST00000432961	630	434.517	0	0	ENST00000432961	630	455.1	0	0	ENST00000432961	630	448.169	0	0	ENST00000432961	630	473.864	0	0
ENST00000420190	626	430.647	0	0	ENST00000420190	626	451.373	0	0	ENST00000420190	626	444.169	0	0	ENST00000420190	626	469.911	0	0
ENST00000437963	387	218.63	0	0	ENST00000437963	387	231.654	0	0	ENST00000437963	387	233.293	0	0	ENST00000437963	387	242.938	0	0
ENST00000342066	2551	2351.39	0	0	ENST00000342066	2551	2373.53	0	0	ENST00000342066	2551	2365.97	0	0	ENST00000342066	2551	2393.45	0	0
ENST00000618181	2179	1979.39	0	0	ENST00000618181	2179	2001.53	0	0	ENST00000618181	2179	1993.97	0	0	ENST00000618181	2179	2021.45	0	0
ENST00000622503	2557	2357.39	0	0	ENST00000622503	2557	2379.53	0	0	ENST00000622503	2557	2371.97	0	0	ENST00000622503	2557	2399.45	0	0
ENST00000618323	2159	1959.39	0	0	ENST00000618323	2159	1981.53	0	0	ENST00000618323	2159	1973.97	0	0	ENST00000618323	2159	2001.45	0	0
ENST00000616016	2391	2191.39	0	0	ENST00000616016	2391	2213.53	0	0	ENST00000616016	2391	2205.97	0	0	ENST00000616016	2391	2233.45	0	0
ENST00000618779	2368	2168.39	0	0	ENST00000618779	2368	2190.53	0	0	ENST00000618779	2368	2182.97	0	0	ENST00000618779	2368	2210.45	0	0
ENST00000616125	2230	2030.39	0	0	ENST00000616125	2230	2052.53	0	0	ENST00000616125	2230	2044.97	0	0	ENST00000616125	2230	2072.45	0	0
ENST00000620200	1874	1674.39	0	0	ENST00000620200	1874	1696.53	0	0	ENST00000620200	1874	1688.97	0	0	ENST00000620200	1874	1716.45	0	0
ENST00000617307	2314	2114.39	0	0	ENST00000617307	2314	2136.53	0	0	ENST00000617307	2314	2128.97	0	0	ENST00000617307	2314	2156.45	0	0
ENST00000341065	2191	1991.39	0	0	ENST00000341065	2191	2013.53	0	0	ENST00000341065	2191	2005.97	0	0	ENST00000341065	2191	2033.45	0	0
ENST00000455979	1731	1531.39	0	0	ENST00000455979	1731	1553.53	0	0	ENST00000455979	1731	1545.97	0	0	ENST00000455979	1731	1573.45	0	0
ENST00000478729	318	167.248	0	0	ENST00000478729	318	178.737	0	0	ENST00000478729	318	179.515	0	0	ENST00000478729	318	183.645	0	0
ENST00000474461	862	663.123	0	0	ENST00000474461	862	684.957	0	0	ENST00000474461	862	677.178	0	0	ENST00000474461	862	704.763	0	0
ENST00000466827	542	351.239	0	0	ENST00000466827	542	370.147	0	0	ENST00000466827	542	363.735	0	0	ENST00000466827	542	387.527	0	0
ENST00000464948	657	460.577	0	0	ENST00000464948	657	481.394	0	0	ENST00000464948	657	474.336	0	0	ENST00000464948	657	500.574	0	0
ENST00000483767	1611	1411.39	0	0	ENST00000483767	1611	1433.53	0	0	ENST00000483767	1611	1425.97	0	0	ENST00000483767	1611	1453.45	0	0
ENST00000327044	2790	2590.39	0	0	ENST00000327044	2790	2612.53	1.35746	0.00541553	ENST00000327044	2790	2604.97	0	0	ENST00000327044	2790	2632.45	0.125281	0.000491859
ENST00000477976	4201	4001.39	0	0	ENST00000477976	4201	4023.53	0	0	ENST00000477976	4201	4015.97	0	0	ENST00000477976	4201	4043.45	2623904	0.00487792
ENST00000496938	149	69.104	0	0	ENST00000496938	149	73.8464	0	0	ENST00000496938	149	67.4047	0	0	ENST00000496938	149	62.9084	0	0
ENST00000487214	865	666.123	0	0	ENST00000487214	865	687.957	0.64254	0.00973449	ENST00000487214	865	680.178	0	0	ENST00000487214	865	707.763	0.966317	0.0141107
ENST00000469563	878	679.056	0	0	ENST00000469563	878	700.749	0	0	ENST00000469563	878	693.04	0	0	ENST00000469563	878	720.692	0	0
ENST00000338591	2560	2360.39	0	0	ENST00000338591	2560	2382.53	0	0	ENST00000338591	2560	2374.97	0	0	ENST00000338591	2560	2402.45	0	0
ENST00000622660	1950	1750.39	0	0	ENST00000622660	1950	1772.53	0	0	ENST00000622660	1950	1764.97	0	0	ENST00000622660	1950	1792.45	0	0
ENST00000463212	955	755.775	0	0	ENST00000463212	955	777.527	0	0	ENST00000463212	955	769.97	0	0	ENST00000463212	955	797.616	0	0
ENST00000466300	913	713.85	0	0	ENST00000466300	913	735.676	0	0	ENST00000466300	913	727.97	0	0	ENST00000466300	913	755.692	0	0
ENST00000481067	515	326.237	0	0	ENST00000481067	515	344.701	0	0	ENST00000481067	515	339.2	0	0	ENST00000481067	515	361.437	0	0
ENST00000617073	57	22.1585	0	0	ENST00000617073	57	22.7333	0	0	ENST00000617073	57	18.5628	0	0	ENST00000617073	57	17.5582	0	0
ENST00000379410	2404	2204.39	0	0	ENST00000379410	2404	2226.53	0	0	ENST00000379410	2404	2218.97	0	0	ENST00000379410	2404	2246.45	0	0
ENST00000379409	2455	2255.39	0	0	ENST00000379409	2455	2277.53	0	0	ENST00000379409	2455	2269.97	0	0	ENST00000379409	2455	2297.45	0	0
ENST00000379407	2194	1994.39	0	0	ENST00000379407	2194	2016.53	0	0	ENST00000379407	2194	2008.97	0	0	ENST00000379407	2194	2036.45	0	0
ENST00000480267	464	281.126	0	0	ENST00000480267	464	298.178	0	0	ENST00000480267	464	294.513	0	0	ENST00000480267	464	313.087	0	0
ENST00000491024	698	500.706	0	0	ENST00000491024	698	522.094	0	0	ENST00000491024	698	514.696	0	0	ENST00000491024	698	541.265	0	0
ENST00000341290	3035	2835.39	0	0	ENST00000341290	3035	2857.53	0	0	ENST00000341290	3035	2849.97	0	0	ENST00000341290	3035	2877.45	0	0
ENST00000479361	1208	1008.39	0	0	ENST00000479361	1208	1030.53	0	0	ENST00000479361	1208	1022.97	0	0	ENST00000479361	1208	1050.45	0	0
ENST00000433179	3340	3140.39	0	0	ENST00000433179	3340	3162.53	0	0	ENST00000433179	3340	3154.97	0	0	ENST00000433179	3340	3182.45	0	0
ENST00000606034	2086	1886.39	0	0	ENST00000606034	2086	1908.53	0	0	ENST00000606034	2086	1900.97	0	0	ENST00000606034	2086	1928.45	0	0
ENST00000428771	1040	840.389	0	0	ENST00000428771	1040	862.527	0	0	ENST00000428771	1040	854.97	0	0	ENST00000428771	1040	882.452	0	0
ENST00000304952	899	699.85	0	0	ENST00000304952	899	721.749	0	0	ENST00000304952	899	713.97	0	0	ENST00000304952	899	741.692	0	0
ENST00000481869	1038	838.389	0	0	ENST00000481869	1038	860.527	0	0	ENST00000481869	1038	852.97	0	0	ENST00000481869	1038	880.452	0	0
ENST00000484667	667	470.483	0	0	ENST00000484667	667	491.247	0	0	ENST00000484667	667	484.144	0	0	ENST00000484667	667	510.371	0	0
ENST00000624697	788	589.634	0	0	ENST00000624697	788	611.15	0	0	ENST00000624697	788	603.372	0	0	ENST00000624697	788	631.03	0	0
ENST00000624652	657	460.577	0	0	ENST00000624652	657	481.394	0	0	ENST00000624652	657	474.336	0	0	ENST00000624652	657	500.574	0	0
ENST00000379389	711	513.349	19	0.493521	ENST00000379389	711	535.041	1	0.0194799	ENST00000379389	711	527.381	32	0.626227	ENST00000379389	711	554.265	11	0.205112
ENST00000423619	154	71.7089	0	0	ENST00000423619	154	76.9443	0	0	ENST00000423619	154	70.8149	0	0	ENST00000423619	154	66.2035	0	0
ENST00000458555	471	287.117	0	0	ENST00000458555	471	304.217	0	0	ENST00000458555	471	300.708	0	0	ENST00000458555	471	319.735	0	0
ENST00000379370	7323	7123.39	0	0	ENST00000379370	7323	7145.53	0	0	ENST00000379370	7323	7137.97	0	0	ENST00000379370	7323	7165.45	0	0
ENST00000620552	7394	7194.39	0	0	ENST00000620552	7394	7216.53	0	0	ENST00000620552	7394	7208.97	0	0	ENST00000620552	7394	7236.45	0	0
ENST00000477585	707	509.503	0	0	ENST00000477585	707	531.041	0	0	ENST00000477585	707	523.539	0	0	ENST00000477585	707	550.265	0	0
ENST00000469403	899	699.85	0	0	ENST00000469403	899	721.749	0	0	ENST00000469403	899	713.97	0	0	ENST00000469403	899	741.692	0	0
ENST00000479707	584	390.206	0	0	ENST00000479707	584	410.532	0	0	ENST00000479707	584	403.268	0	0	ENST00000479707	584	428.314	0	0
ENST00000466223	459	276.797	0	0	ENST00000466223	459	293.757	0	0	ENST00000466223	459	290.246	0	0	ENST00000466223	459	308.403	0	0
ENST00000478677	276	140.088	0	0	ENST00000478677	276	150.659	0	0	ENST00000478677	276	149.33	0	0	ENST00000478677	276	149.856	0	0
ENST00000492947	690	492.855	0	0	ENST00000492947	690	514.146	0	0	ENST00000492947	690	506.747	0	0	ENST00000492947	690	533.319	0	0
ENST00000419249	813	614.573	0	0	ENST00000419249	813	636.024	0	0	ENST00000419249	813	628.309	0	0	ENST00000419249	813	655.965	0	0
ENST00000461111	3385	3185.39	0	0	ENST00000461111	3385	3207.53	0	0	ENST00000461111	3385	3199.97	0	0	ENST00000461111	3385	3227.45	0	0
ENST00000418300	402	230.179	0	0	ENST00000418300	402	244.373	0	0	ENST00000418300	402	244.283	0	0	ENST00000418300	402	256.129	0	0
ENST00000427998	977	777.468	0	0	ENST00000427998	977	799.527	0	0	ENST00000427998	977	791.97	0	0	ENST00000427998	977	819.535	0	0
ENST00000394517	397	226.278	0	0	ENST00000394517	397	240.171	0	0	ENST00000394517	397	240.501	0	0	ENST00000394517	397	251.707	0	0
ENST00000456409	750	551.921	0	0	ENST00000456409	750	573.21	0	0	ENST00000456409	750	565.841	0	0	ENST00000456409	750	593.151	0	0
ENST00000412397	1219	1019.39	0	0	ENST00000412397	1219	1041.53	0	0	ENST00000412397	1219	1033.97	0	0	ENST00000412397	1219	1061.45	0	0
ENST00000433695	540	349.346	0	0	ENST00000433695	540	368.222	0	0	ENST00000433695	540	361.809	0	0	ENST00000433695	540	385.605	0	0
ENST00000451054	565	372.589	0	0	ENST00000451054	565	392.222	0	0	ENST00000451054	565	385.26	0	0	ENST00000451054	565	409.774	0	0
ENST00000442292	829	630.447	0	0	ENST00000442292	829	652.024	0	0	ENST00000442292	829	644.246	0	0	ENST00000442292	829	671.832	0	0
ENST00000453464	1902	1702.39	0	0	ENST00000453464	1902	1724.53	0	0	ENST00000453464	1902	1716.97	0	0	ENST00000453464	1902	1744.45	0	0
ENST00000379339	2429	2229.39	0	0	ENST00000379339	2429	2251.53	0	0	ENST00000379339	2429	2243.97	0	0	ENST00000379339	2429	2271.45	0	0
ENST00000465822	1933	1733.39	0	0	ENST00000465822	1933	1755.53	0	0	ENST00000465822	1933	1747.97	0	0	ENST00000465822	1933	1775.45	0	0
ENST00000379325	2010	1810.39	0	0	ENST00000379325	2010	1832.53	0	0	ENST00000379325	2010	1824.97	0	0	ENST00000379325	2010	1852.45	0	0
ENST00000421241	1841	1641.39	0	0	ENST00000421241	1841	1663.53	0	0	ENST00000421241	1841	1655.97	0	0	ENST00000421241	1841	1683.45	0	0
ENST00000487177	3315	3115.39	0	0	ENST00000487177	3315	3137.53	0	0	ENST00000487177	3315	3129.97	0	0	ENST00000487177	3315	3157.45	0	0
ENST00000477196	3214	3014.39	0	0	ENST00000477196	3214	3036.53	0	0	ENST00000477196	3214	3028.97	0	0	ENST00000477196	3214	3056.45	0	0
ENST00000467751	2099	1899.39	0	0	ENST00000467751	2099	1921.53	0	0	ENST00000467751	2099	1913.97	0	0	ENST00000467751	2099	1941.45	0	0
ENST00000464905	650	453.806	0	0	ENST00000464905	650	474.682	0	0	ENST00000464905	650	467.619	0	0	ENST00000464905	650	493.623	0	0
ENST00000379320	2324	2124.39	0	0	ENST00000379320	2324	2146.53	0	0	ENST00000379320	2324	2138.97	0	0	ENST00000379320	2324	2166.45	0	0
ENST00000379319	1097	897.389	0	0	ENST00000379319	1097	919.527	0	0	ENST00000379319	1097	911.97	0	0	ENST00000379319	1097	939.452	0	0
ENST00000434641	842	643.384	0	0	ENST00000434641	842	665.024	0	0	ENST00000434641	842	657.246	0	0	ENST00000434641	842	684.832	0	0
ENST00000482816	982	782.468	0	0	ENST00000482816	982	804.527	0	0	ENST00000482816	982	796.97	0	0	ENST00000482816	982	824.535	0	0
ENST00000462097	836	637.384	0	0	ENST00000462097	836	659.024	0	0	ENST00000462097	836	651.246	0	0	ENST00000462097	836	678.832	0	0
ENST00000473600	793	594.634	0	0	ENST00000473600	793	616.15	0	0	ENST00000473600	793	608.372	0	0	ENST00000473600	793	636.03	0	0
ENST00000475119	740	542.032	0	0	ENST00000475119	740	563.493	0	0	ENST00000475119	740	555.841	0	0	ENST00000475119	740	583.151	0	0
ENST00000442117	554	362.332	0	0	ENST00000442117	554	381.691	0	0	ENST00000442117	554	374.953	0	0	ENST00000442117	554	398.936	0	0
ENST00000427787	575	381.635	0	0	ENST00000427787	575	401.942	0	0	ENST00000427787	575	394.709	0	0	ENST00000427787	575	419.484	0	0
ENST00000472741	661	464.53	0	0	ENST00000472741	661	485.394	0	0	ENST00000472741	661	478.288	0	0	ENST00000472741	661	504.523	0	0
ENST00000480643	579	385.441	0	0	ENST00000480643	579	405.82	0	0	ENST00000480643	579	398.47	0	0	ENST00000480643	579	423.357	0	0
ENST00000416774	1620	1420.39	0	0	ENST00000416774	1620	1442.53	0	0	ENST00000416774	1620	1434.97	0	0	ENST00000416774	1620	1462.45	0	0
ENST00000384997	111	45.4418	0	0	ENST00000384997	111	46.8423	0	0	ENST00000384997	111	40.8998	0	0	ENST00000384997	111	38.6155	0	0
ENST00000384875	111	45.4418	0	0	ENST00000384875	111	46.8423	0	0	ENST00000384875	111	40.8998	0	0	ENST00000384875	111	38.6155	0	0
ENST00000362106	83	28.0273	0	0	ENST00000362106	83	30.8582	0	0	ENST00000362106	83	25.0227	0	0	ENST00000362106	83	23.7285	0	0
ENST00000606993	987	787.389	0	0	ENST00000606993	987	809.527	0	0	ENST00000606993	987	801.97	0	0	ENST00000606993	987	829.452	0	0
ENST00000379317	3532	3332.39	0	0	ENST00000379317	3532	3354.53	0	0	ENST00000379317	3532	3346.97	0	0	ENST00000379317	3532	3374.45	0	0
ENST00000506177	557	365.037	0	0	ENST00000506177	557	384.575	0	0	ENST00000506177	557	377.725	0	0	ENST00000506177	557	401.896	0	0
ENST00000379290	2283	2083.39	0	0	ENST00000379290	2283	2105.53	0	0	ENST00000379290	2283	2097.97	0	0	ENST00000379290	2283	2125.45	0	0
ENST00000379289	2259	2059.39	0	0	ENST00000379289	2259	2081.53	0	0	ENST00000379289	2259	2073.97	0	0	ENST00000379289	2259	2101.45	0	0
ENST00000379288	2114	1914.39	0	0	ENST00000379288	2114	1936.53	0	0	ENST00000379288	2114	1928.97	0	0	ENST00000379288	2114	1956.45	0	0
ENST00000460998	718	520.297	0	0	ENST00000460998	718	541.987	0	0	ENST00000460998	718	534.275	0	0	ENST00000460998	718	561.21	0	0
ENST00000514695	219	108.39	0	0	ENST00000514695	219	117.697	0	0	ENST00000514695	219	112.046	0	0	ENST00000514695	219	107.494	0	0
ENST00000486379	426	249.389	0	0	ENST00000486379	426	264.803	0	0	ENST00000486379	426	263.531	0	0	ENST00000486379	426	278.176	0	0
ENST00000328596	851	652.189	0	0	ENST00000328596	851	673.957	0	0	ENST00000328596	851	666.246	0	0	ENST00000328596	851	693.763	0	0
ENST00000379268	1179	979.389	0	0	ENST00000379268	1179	1001.53	0	0	ENST00000379268	1179	993.97	0	0	ENST00000379268	1179	1021.45	0	0
ENST00000486728	727	529.192	0	0	ENST00000486728	727	550.66	0	0	ENST00000486728	727	543.006	0	0	ENST00000486728	727	570.21	0	0
ENST00000379265	705	507.605	0	0	ENST00000379265	705	529.041	0	0	ENST00000379265	705	521.644	0	0	ENST00000379265	705	548.265	0	0
ENST00000379236	1068	868.389	0	0	ENST00000379236	1068	890.527	0	0	ENST00000379236	1068	882.97	0	0	ENST00000379236	1068	910.452	0	0
ENST00000497869	1707	1507.39	0	0	ENST00000497869	1707	1529.53	0	0	ENST00000497869	1707	1521.97	0	0	ENST00000497869	1707	1549.45	0	0
ENST00000453580	393	223.068	0	0	ENST00000453580	393	236.68	0	0	ENST00000453580	393	237.864	0	0	ENST00000453580	393	248.173	0	0
ENST00000360001	1956	1756.39	0	0	ENST00000360001	1956	1778.53	0	0	ENST00000360001	1956	1770.97	1	0.00582768	ENST00000360001	1956	1798.45	0	0
ENST00000465727	2095	1895.39	0	0	ENST00000465727	2095	1917.53	0	0	ENST00000465727	2095	1909.97	0	0	ENST00000465727	2095	1937.45	0	0
ENST00000263741	2079	1879.39	0	0	ENST00000263741	2079	1901.53	0	0	ENST00000263741	2079	1893.97	0	0	ENST00000263741	2079	1921.45	0	0
ENST00000494748	3516	3316.39	0	0	ENST00000494748	3516	3338.53	0	0	ENST00000494748	3516	3330.97	0	0	ENST00000494748	3516	3358.45	0	0
ENST00000478938	2591	2391.39	0	0	ENST00000478938	2591	2413.53	0	0	ENST00000478938	2591	2405.97	0	0	ENST00000478938	2591	2433.45	0	0
ENST00000403997	728	530.192	0	0	ENST00000403997	728	551.66	0	0	ENST00000403997	728	544.006	0	0	ENST00000403997	728	571.21	0	0
ENST00000459994	604	409.365	0	0	ENST00000459994	604	429.772	0	0	ENST00000459994	604	422.646	0	0	ENST00000459994	604	448.14	0	0
ENST00000379198	2777	2577.39	0	0	ENST00000379198	2777	2599.53	0	0	ENST00000379198	2777	2591.97	0	0	ENST00000379198	2777	2619.45	0	0
ENST00000462849	682	485.051	0	0	ENST00000462849	682	506.197	0	0	ENST00000462849	682	498.747	0	0	ENST00000462849	682	525.319	0	0
ENST00000478606	522	332.564	0	0	ENST00000478606	522	351.207	0	0	ENST00000478606	522	345.535	0	0	ENST00000478606	522	368.327	0	0
ENST00000330388	1036	836.389	0	0	ENST00000330388	1036	858.527	0	0	ENST00000330388	1036	850.97	0	0	ENST00000330388	1036	878.452	0	0
ENST00000468365	647	450.852	0	0	ENST00000468365	647	471.682	0	0	ENST00000468365	647	464.666	0	0	ENST00000468365	647	490.623	0	0
ENST00000486627	639	442.987	0	0	ENST00000486627	639	463.916	0	0	ENST00000486627	639	456.805	0	0	ENST00000486627	639	482.721	0	0
ENST00000565563	1558	1358.39	0	0	ENST00000565563	1558	1380.53	0	0	ENST00000565563	1558	1372.97	0	0	ENST00000565563	1558	1400.45	0	0
ENST00000450390	2455	2255.39	0	0	ENST00000450390	2455	2277.53	0	0	ENST00000450390	2455	2269.97	0	0	ENST00000450390	2455	2297.45	0	0
ENST00000347370	2387	2187.39	0	0	ENST00000347370	2387	2209.53	0	0	ENST00000347370	2387	2201.97	0	0	ENST00000347370	2387	2229.45	0	0
ENST00000349431	1733	1533.39	0	0	ENST00000349431	1733	1555.53	0	0	ENST00000349431	1733	1547.97	0	0	ENST00000349431	1733	1575.45	0	0
ENST00000400929	1057	857.389	0	0	ENST00000400929	1057	879.527	0	0	ENST00000400929	1057	871.97	0	0	ENST00000400929	1057	899.452	0	0
ENST00000464036	1256	1056.39	0	0	ENST00000464036	1256	1078.53	0	0	ENST00000464036	1256	1070.97	0	0	ENST00000464036	1256	1098.45	0	0
ENST00000360466	1047	847.389	0	0	ENST00000360466	1047	869.527	0	0	ENST00000360466	1047	861.97	0	0	ENST00000360466	1047	889.452	0	0
ENST00000400930	1021	821.389	0	0	ENST00000400930	1021	843.527	0	0	ENST00000400930	1021	835.97	0	0	ENST00000400930	1021	863.452	0	0
ENST00000467339	515	326.237	0	0	ENST00000467339	515	344.701	0	0	ENST00000467339	515	339.2	0	0	ENST00000467339	515	361.437	0	0
ENST00000473215	1028	828.389	0	0	ENST00000473215	1028	850.527	0	0	ENST00000473215	1028	842.97	0	0	ENST00000473215	1028	870.452	0	0
ENST00000435198	1056	856.389	0	0	ENST00000435198	1056	878.527	0	0	ENST00000435198	1056	870.97	0	0	ENST00000435198	1056	898.452	0	0
ENST00000509720	472	288.057	0	0	ENST00000509720	472	305.154	0	0	ENST00000509720	472	301.677	0	0	ENST00000509720	472	320.702	0	0
ENST00000491779	611	416.116	0	0	ENST00000491779	611	436.642	0	0	ENST00000491779	611	429.475	0	0	ENST00000491779	611	455.004	0	0
ENST00000466752	886	686.92	0	0	ENST00000466752	886	708.749	0	0	ENST00000466752	886	701.04	0	0	ENST00000466752	886	728.692	0	0
ENST00000503294	814	615.573	0	0	ENST00000503294	814	637.024	0	0	ENST00000503294	814	629.309	0	0	ENST00000503294	814	656.899	0	0
ENST00000477894	767	568.865	0	0	ENST00000477894	767	590.21	0	0	ENST00000477894	767	582.668	0	0	ENST00000477894	767	610.091	0	0
ENST00000471154	336	179.68	0	0	ENST00000471154	336	191.719	0	0	ENST00000471154	336	192.884	0	0	ENST00000471154	336	198.736	0	0
ENST00000422076	643	446.897	0	0	ENST00000422076	643	467.823	0	0	ENST00000422076	643	460.759	0	0	ENST00000422076	643	486.672	0	0
ENST00000502382	530	340.048	0	0	ENST00000502382	530	358.811	0	0	ENST00000502382	530	352.894	0	0	ENST00000502382	530	376.064	0	0
ENST00000461142	837	638.384	0	0	ENST00000461142	837	660.024	0	0	ENST00000461142	837	652.246	0	0	ENST00000461142	837	679.832	0	0
ENST00000488418	750	551.921	0	0	ENST00000488418	750	573.21	0	0	ENST00000488418	750	565.841	0	0	ENST00000488418	750	593.151	0	0
ENST00000434139	268	135.334	0	0	ENST00000434139	268	145.599	0	0	ENST00000434139	268	143.637	0	0	ENST00000434139	268	143.234	0	0
ENST00000453732	389	220.047	0	0	ENST00000453732	389	233.206	0	0	ENST00000453732	389	234.801	0	0	ENST00000453732	389	244.582	0	0
ENST00000379116	3044	2844.39	0	0	ENST00000379116	3044	2866.53	0	0	ENST00000379116	3044	2858.97	0	0	ENST00000379116	3044	2886.45	0	0
ENST00000379101	2268	2068.39	0	0	ENST00000379101	2268	2090.53	0	0	ENST00000379101	2268	2082.97	0	0	ENST00000379101	2268	2110.45	0	0
ENST00000338555	3475	3275.39	0	0	ENST00000338555	3475	3297.53	0	0	ENST00000338555	3475	3289.97	0	0	ENST00000338555	3475	3317.45	0	0
ENST00000616713	2871	2671.39	0	0	ENST00000616713	2871	2693.53	0	0	ENST00000616713	2871	2685.97	0	0	ENST00000616713	2871	2713.45	0	0
ENST00000400928	2731	2531.39	0	0	ENST00000400928	2731	2553.53	0	0	ENST00000400928	2731	2545.97	0	0	ENST00000400928	2731	2573.45	0	0
ENST00000470022	645	448.897	0	0	ENST00000470022	645	469.776	0	0	ENST00000470022	645	462.713	0	0	ENST00000470022	645	488.672	0	0
ENST00000325425	2679	2479.39	0	0	ENST00000325425	2679	2501.53	0	0	ENST00000325425	2679	2493.97	0	0	ENST00000325425	2679	2521.45	0	0
ENST00000467651	204	100.516	0	0	ENST00000467651	204	108.711	0	0	ENST00000467651	204	102.215	0	0	ENST00000467651	204	97.5351	0	0
ENST00000379099	923	723.85	0	0	ENST00000379099	923	745.602	0	0	ENST00000379099	923	737.97	0	0	ENST00000379099	923	765.616	0	0
ENST00000354700	3896	3696.39	0	0	ENST00000354700	3896	3718.53	0	0	ENST00000354700	3896	3710.97	0	0	ENST00000354700	3896	3738.45	0	0
ENST00000492936	5319	5119.39	0	0	ENST00000492936	5319	5141.53	0	0	ENST00000492936	5319	5133.97	0	0	ENST00000492936	5319	5161.45	0	0
ENST00000467278	2725	2525.39	0	0	ENST00000467278	2725	2547.53	0	0	ENST00000467278	2725	2539.97	0	0	ENST00000467278	2725	2567.45	0	0
ENST00000353662	2280	2080.39	0	0	ENST00000353662	2280	2102.53	0	0	ENST00000353662	2280	2094.97	0	0	ENST00000353662	2280	2122.45	0	0
ENST00000470659	421	245.37	0	0	ENST00000470659	421	260.38	0	0	ENST00000470659	421	259.733	0	0	ENST00000470659	421	273.6	0	0
ENST00000379037	492	305.836	0	0	ENST00000379037	492	323.268	0	0	ENST00000379037	492	318.884	0	0	ENST00000379037	492	339.572	0	0
ENST00000476572	819	620.573	0	0	ENST00000476572	819	642.024	0	0	ENST00000476572	819	634.309	0	0	ENST00000476572	819	661.899	0	0
ENST00000493992	326	172.946	0	0	ENST00000493992	326	184.351	0	0	ENST00000493992	326	185.29	0	0	ENST00000493992	326	190.327	0	0
ENST00000472541	1946	1746.39	0	0	ENST00000472541	1946	1768.53	0	0	ENST00000472541	1946	1760.97	0	0	ENST00000472541	1946	1788.45	0	0
ENST00000354980	582	388.246	0	0	ENST00000354980	582	408.655	0	0	ENST00000354980	582	401.349	0	0	ENST00000354980	582	426.314	0	0
ENST00000478065	2393	2193.39	0	0	ENST00000478065	2393	2215.53	0	0	ENST00000478065	2393	2207.97	0	0	ENST00000478065	2393	2235.45	0	0
ENST00000479108	485	299.558	0	0	ENST00000479108	485	316.727	0	0	ENST00000479108	485	312.699	0	0	ENST00000479108	485	332.844	0	0
ENST00000438966	265	133.518	0	0	ENST00000438966	265	143.608	0	0	ENST00000438966	265	141.567	0	0	ENST00000438966	265	140.959	0	0
ENST00000613751	61	23.5987	0	0	ENST00000613751	61	23.9357	0	0	ENST00000613751	61	20.2672	0	0	ENST00000613751	61	18.6764	0	0
ENST00000379031	1287	1087.39	0	0	ENST00000379031	1287	1109.53	0	0	ENST00000379031	1287	1101.97	0	0	ENST00000379031	1287	1129.45	0	0
ENST00000470520	769	570.865	0	0	ENST00000470520	769	592.21	0	0	ENST00000470520	769	584.668	0	0	ENST00000470520	769	612.03	0	0
ENST00000463758	940	740.85	0	0	ENST00000463758	940	762.527	0	0	ENST00000463758	940	754.97	0	0	ENST00000463758	940	782.616	0	0
ENST00000467712	877	678.056	0	0	ENST00000467712	877	699.749	0	0	ENST00000467712	877	692.04	0	0	ENST00000467712	877	719.692	0	0
ENST00000493657	1783	1583.39	0	0	ENST00000493657	1783	1605.53	0	0	ENST00000493657	1783	1597.97	0	0	ENST00000493657	1783	1625.45	0	0
ENST00000470030	2369	2169.39	0	0	ENST00000470030	2369	2191.53	0	0	ENST00000470030	2369	2183.97	0	0	ENST00000470030	2369	2211.45	0	0
ENST00000540437	2629	2429.39	0	0	ENST00000540437	2629	2451.53	0	0	ENST00000540437	2629	2443.97	0	0	ENST00000540437	2629	2471.45	0	0
ENST00000545578	2263	2063.39	0	0	ENST00000545578	2263	2085.53	0	0	ENST00000545578	2263	2077.97	0	0	ENST00000545578	2263	2105.45	0	0
ENST00000620829	1862	1662.39	0	0	ENST00000620829	1862	1684.53	0	0	ENST00000620829	1862	1676.97	0	0	ENST00000620829	1862	1704.45	0	0
ENST00000618806	1523	1323.39	0	0	ENST00000618806	1523	1345.53	0	0	ENST00000618806	1523	1337.97	0	0	ENST00000618806	1523	1365.45	0	0
ENST00000435064	2148	1948.39	0	0	ENST00000435064	2148	1970.53	0	0	ENST00000435064	2148	1962.97	0	0	ENST00000435064	2148	1990.45	0	0
ENST00000497304	932	732.85	0	0	ENST00000497304	932	754.527	0	0	ENST00000497304	932	746.97	0	0	ENST00000497304	932	774.616	0	0
ENST00000323275	2450	2250.39	0	0	ENST00000323275	2450	2272.53	0	0	ENST00000323275	2450	2264.97	0	0	ENST00000323275	2450	2292.45	0	0
ENST00000411962	1832	1632.39	0	0	ENST00000411962	1832	1654.53	0	0	ENST00000411962	1832	1646.97	0	0	ENST00000411962	1832	1674.45	0	0
ENST00000462432	2863	2663.39	0	0	ENST00000462432	2863	2685.53	0	0	ENST00000462432	2863	2677.97	0	0	ENST00000462432	2863	2705.45	0	0
ENST00000478641	3079	2879.39	0	0	ENST00000478641	3079	2901.53	0	0	ENST00000478641	3079	2893.97	0	0	ENST00000478641	3079	2921.45	0	0
ENST00000421495	1868	1668.39	0	0	ENST00000421495	1868	1690.53	0	0	ENST00000421495	1868	1682.97	0	0	ENST00000421495	1868	1710.45	0	0
ENST00000458452	2571	2371.39	0	0	ENST00000458452	2571	2393.53	0	0	ENST00000458452	2571	2385.97	0	0	ENST00000458452	2571	2413.45	0	0
ENST00000419704	1798	1598.39	0	0	ENST00000419704	1798	1620.53	0	0	ENST00000419704	1798	1612.97	0	0	ENST00000419704	1798	1640.45	0	0
ENST00000532772	1618	1418.39	0	0	ENST00000532772	1618	1440.53	0	0	ENST00000532772	1618	1432.97	0	0	ENST00000532772	1618	1460.45	0	0
ENST00000450926	1839	1639.39	0	0	ENST00000450926	1839	1661.53	0	0	ENST00000450926	1839	1653.97	0	0	ENST00000450926	1839	1681.45	0	0
ENST00000527098	2004	1804.39	0	0	ENST00000527098	2004	1826.53	0	0	ENST00000527098	2004	1818.97	0	0	ENST00000527098	2004	1846.45	0	0
ENST00000485710	883	683.92	0	0	ENST00000485710	883	705.749	0	0	ENST00000485710	883	698.04	0	0	ENST00000485710	883	725.692	0	0
ENST00000461514	913	713.85	0	0	ENST00000461514	913	735.676	0	0	ENST00000461514	913	727.97	0	0	ENST00000461514	913	755.692	0	0
ENST00000525164	816	617.573	0	0	ENST00000525164	816	639.024	0	0	ENST00000525164	816	631.309	0	0	ENST00000525164	816	658.899	0	0
ENST00000528879	1524	1324.39	0	0	ENST00000528879	1524	1346.53	0	0	ENST00000528879	1524	1338.97	0	0	ENST00000528879	1524	1366.45	0	0
ENST00000525769	695	497.806	0	0	ENST00000525769	695	519.094	0	0	ENST00000525769	695	511.696	0	0	ENST00000525769	695	538.319	0	0
ENST00000531377	816	617.573	0	0	ENST00000531377	816	639.024	0	0	ENST00000531377	816	631.309	0	0	ENST00000531377	816	658.899	0	0
ENST00000527383	668	471.483	0	0	ENST00000527383	668	492.247	0	0	ENST00000527383	668	485.144	0	0	ENST00000527383	668	511.371	0	0
ENST00000531292	704	506.605	0	0	ENST00000531292	704	528.094	0	0	ENST00000531292	704	520.696	0	0	ENST00000531292	704	547.265	0	0
ENST00000467408	639	442.987	0	0	ENST00000467408	639	463.916	0	0	ENST00000467408	639	456.805	0	0	ENST00000467408	639	482.721	0	0
ENST00000434694	1056	856.389	0	0	ENST00000434694	1056	878.527	0	0	ENST00000434694	1056	870.97	0	0	ENST00000434694	1056	898.452	0	0
ENST00000531020	548	356.662	0	0	ENST00000531020	548	375.921	0	0	ENST00000531020	548	369.103	0	0	ENST00000531020	548	393.175	0	0
ENST00000533916	405	232.499	0	0	ENST00000533916	405	246.749	0	0	ENST00000533916	405	246.776	0	0	ENST00000533916	405	258.943	0	0
ENST00000488042	1134	934.389	0	0	ENST00000488042	1134	956.527	0	0	ENST00000488042	1134	948.97	0	0	ENST00000488042	1134	976.452	0	0
ENST00000526797	659	462.577	0	0	ENST00000526797	659	483.394	0	0	ENST00000526797	659	476.288	0	0	ENST00000526797	659	502.574	0	0
ENST00000526332	579	385.441	0	0	ENST00000526332	579	405.82	0	0	ENST00000526332	579	398.47	0	0	ENST00000526332	579	423.357	0	0
ENST00000430786	849	650.189	0	0	ENST00000430786	849	671.957	0	0	ENST00000430786	849	664.246	0	0	ENST00000430786	849	691.763	0	0
ENST00000527719	750	551.921	0	0	ENST00000527719	750	573.21	0	0	ENST00000527719	750	565.841	0	0	ENST00000527719	750	593.151	0	0
ENST00000530031	800	601.634	0	0	ENST00000530031	800	623.15	0	0	ENST00000530031	800	615.372	0	0	ENST00000530031	800	643.03	0	0
ENST00000526113	591	396.69	0	0	ENST00000526113	591	417.364	0	0	ENST00000526113	591	409.94	0	0	ENST00000526113	591	435.228	0	0
ENST00000526904	551	359.626	0	0	ENST00000526904	551	378.921	0	0	ENST00000526904	551	371.953	0	0	ENST00000526904	551	396.016	0	0
ENST00000525603	738	540.032	0	0	ENST00000525603	738	561.493	0	0	ENST00000525603	738	553.841	0	0	ENST00000525603	738	581.21	0	0
ENST00000429572	1104	904.389	0	0	ENST00000429572	1104	926.527	0	0	ENST00000429572	1104	918.97	0	0	ENST00000429572	1104	946.452	0	0
ENST00000498173	1589	1389.39	0	0	ENST00000498173	1589	1411.53	0	0	ENST00000498173	1589	1403.97	0	0	ENST00000498173	1589	1431.45	0	0
ENST00000496353	2428	2228.39	0	0	ENST00000496353	2428	2250.53	0	0	ENST00000496353	2428	2242.97	0	0	ENST00000496353	2428	2270.45	0	0
ENST00000493534	896	696.92	0	0	ENST00000493534	896	718.749	0	0	ENST00000493534	896	710.97	0	0	ENST00000493534	896	738.692	0	0
ENST00000534345	485	299.558	0	0	ENST00000534345	485	316.727	0	0	ENST00000534345	485	312.699	0	0	ENST00000534345	485	332.844	0	0
ENST00000532952	773	574.808	0	0	ENST00000532952	773	596.21	0	0	ENST00000532952	773	588.61	0	0	ENST00000532952	773	616.03	0	0
ENST00000490853	704	506.605	0	0	ENST00000490853	704	528.094	0	0	ENST00000490853	704	520.696	0	0	ENST00000490853	704	547.265	0	0
ENST00000531019	549	357.662	0	0	ENST00000531019	549	376.921	0	0	ENST00000531019	549	369.991	0	0	ENST00000531019	549	394.096	0	0
ENST00000498476	554	362.332	0	0	ENST00000498476	554	381.691	0	0	ENST00000498476	554	374.953	0	0	ENST00000498476	554	398.936	0	0
ENST00000470679	584	390.206	0	0	ENST00000470679	584	410.532	0	0	ENST00000470679	584	403.268	0	0	ENST00000470679	584	428.314	0	0
ENST00000525285	579	385.441	0	0	ENST00000525285	579	405.82	0	0	ENST00000525285	579	398.47	0	0	ENST00000525285	579	423.357	1	0.0244124
ENST00000627245	138	62.7786	0	0	ENST00000627245	138	66.4765	0	0	ENST00000627245	138	60.4442	0	0	ENST00000627245	138	56.5407	0	0
ENST00000530233	595	400.569	0	0	ENST00000530233	595	420.943	0	0	ENST00000530233	595	413.899	0	0	ENST00000530233	595	439.184	0	0
ENST00000620702	65	24.4562	0	0	ENST00000620702	65	25.1536	0	0	ENST00000620702	65	20.8616	0	0	ENST00000620702	65	19.153	0	0
ENST00000444968	386	217.775	0	0	ENST00000444968	386	230.778	0	0	ENST00000444968	386	232.499	0	0	ENST00000444968	386	242.089	0	0
ENST00000464957	1101	901.389	0	0	ENST00000464957	1101	923.527	0	0	ENST00000464957	1101	915.97	0	0	ENST00000464957	1101	943.452	0	0
ENST00000343938	2190	1990.39	0	0	ENST00000343938	2190	2012.53	0	0	ENST00000343938	2190	2004.97	0	0	ENST00000343938	2190	2032.45	0	0
ENST00000488011	783	584.692	0	0	ENST00000488011	783	606.15	0	0	ENST00000488011	783	598.432	0	0	ENST00000488011	783	626.03	0	0
ENST00000339381	3433	3233.39	0	0	ENST00000339381	3433	3255.53	0	0	ENST00000339381	3433	3247.97	0	0	ENST00000339381	3433	3275.45	0	0
ENST00000378891	2926	2726.39	0	0	ENST00000378891	2926	2748.53	0	0	ENST00000378891	2926	2740.97	0	0	ENST00000378891	2926	2768.45	0	0
ENST00000378888	3239	3039.39	0	0	ENST00000378888	3239	3061.53	0	0	ENST00000378888	3239	3053.97	0	0	ENST00000378888	3239	3081.45	0	0
ENST00000610709	2268	2068.39	0	0	ENST00000610709	2268	2090.53	0	0	ENST00000610709	2268	2082.97	0	0	ENST00000610709	2268	2110.45	0	0
ENST00000632445	785	586.634	0	0	ENST00000632445	785	608.15	0	0	ENST00000632445	785	600.432	0	0	ENST00000632445	785	628.03	0	0
ENST00000631679	778	579.692	0	0	ENST00000631679	778	601.21	0	0	ENST00000631679	778	593.491	0	0	ENST00000631679	778	621.03	0	0
ENST00000634054	828	629.447	0	0	ENST00000634054	828	651.024	0	0	ENST00000634054	828	643.246	0	0	ENST00000634054	828	670.832	0	0
ENST00000633096	580	386.402	0	0	ENST00000633096	580	406.82	0	0	ENST00000633096	580	399.389	0	0	ENST00000633096	580	424.357	0	0
ENST00000472445	639	442.987	0	0	ENST00000472445	639	463.916	0	0	ENST00000472445	639	456.805	0	0	ENST00000472445	639	482.721	0	0
ENST00000616525	59	22.5057	0	0	ENST00000616525	59	22.8519	0	0	ENST00000616525	59	18.6383	0	0	ENST00000616525	59	17.632	0	0
ENST00000474033	1171	971.389	0	0	ENST00000474033	1171	993.527	0	0	ENST00000474033	1171	985.97	0	0	ENST00000474033	1171	1013.45	0	0
ENST00000342753	2231	2031.39	0	0	ENST00000342753	2231	2053.53	0	0	ENST00000342753	2231	2045.97	0	0	ENST00000342753	2231	2073.45	0	0
ENST00000309212	2273	2073.39	0	0	ENST00000309212	2273	2095.53	0	0	ENST00000309212	2273	2087.97	0	0	ENST00000309212	2273	2115.45	0	0
ENST00000445648	2001	1801.39	0	0	ENST00000445648	2001	1823.53	0	0	ENST00000445648	2001	1815.97	0	0	ENST00000445648	2001	1843.45	0	0
ENST00000477278	2728	2528.39	0	0	ENST00000477278	2728	2550.53	0	0	ENST00000477278	2728	2542.97	0	0	ENST00000477278	2728	2570.45	0	0
ENST00000473097	975	775.468	0	0	ENST00000473097	975	797.527	0	0	ENST00000473097	975	789.97	0	0	ENST00000473097	975	817.535	0	0
ENST00000478517	846	647.384	0	0	ENST00000478517	846	669.024	0	0	ENST00000478517	846	661.246	0	0	ENST00000478517	846	688.832	0	0
ENST00000476718	1001	801.389	0	0	ENST00000476718	1001	823.527	0	0	ENST00000476718	1001	815.97	0	0	ENST00000476718	1001	843.452	0	0
ENST00000464351	405	232.499	0	0	ENST00000464351	405	246.749	0	0	ENST00000464351	405	246.776	0	0	ENST00000464351	405	258.943	0	0
ENST00000460473	339	181.958	0	0	ENST00000460473	339	193.937	0	0	ENST00000460473	339	195.433	0	0	ENST00000460473	339	201.393	0	0
ENST00000338370	1072	872.389	0	0	ENST00000338370	1072	894.527	0	0	ENST00000338370	1072	886.97	0	0	ENST00000338370	1072	914.452	0	0
ENST00000338338	1047	847.389	0	0	ENST00000338338	1047	869.527	0	0	ENST00000338338	1047	861.97	0	0	ENST00000338338	1047	889.452	0	0
ENST00000321751	798	599.634	0	0	ENST00000321751	798	621.15	0	0	ENST00000321751	798	613.372	0	0	ENST00000321751	798	641.03	0	0
ENST00000378853	875	676.056	0	0	ENST00000378853	875	697.749	0	0	ENST00000378853	875	690.11	0	0	ENST00000378853	875	717.692	0	0
ENST00000489799	695	497.806	0	0	ENST00000489799	695	519.094	0	0	ENST00000489799	695	511.696	0	0	ENST00000489799	695	538.319	0	0
ENST00000496905	608	413.157	0	0	ENST00000496905	608	433.642	0	0	ENST00000496905	608	426.518	0	0	ENST00000496905	608	452.094	0	0
ENST00000435351	367	203.301	0	0	ENST00000435351	367	215.393	0	0	ENST00000435351	367	217.043	0	0	ENST00000435351	367	225.516	0	0
ENST00000480479	2792	2592.39	0	0	ENST00000480479	2792	2614.53	0	0	ENST00000480479	2792	2606.97	0	0	ENST00000480479	2792	2634.45	0	0
ENST00000482621	2059	1859.39	0	0	ENST00000482621	2059	1881.53	0	0	ENST00000482621	2059	1873.97	0	0	ENST00000482621	2059	1901.45	0	0
ENST00000463260	1941	1741.39	0	0	ENST00000463260	1941	1763.53	0	0	ENST00000463260	1941	1755.97	0	0	ENST00000463260	1941	1783.45	0	0
ENST00000400809	2305	2105.39	0	0	ENST00000400809	2305	2127.53	0	0	ENST00000400809	2305	2119.97	0	0	ENST00000400809	2305	2147.45	0	0
ENST00000496007	4452	4252.39	0	0	ENST00000496007	4452	4274.53	0	0	ENST00000496007	4452	4266.97	0	0	ENST00000496007	4452	4294.45	0	0
ENST00000482365	2620	2420.39	0	0	ENST00000482365	2620	2442.53	0	0	ENST00000482365	2620	2434.97	0	0	ENST00000482365	2620	2462.45	0	0
ENST00000408952	1857	1657.39	0	0	ENST00000408952	1857	1679.53	0	0	ENST00000408952	1857	1671.97	0	0	ENST00000408952	1857	1699.45	0	0
ENST00000481223	2815	2615.39	0	0	ENST00000481223	2815	2637.53	0	0	ENST00000481223	2815	2629.97	0	0	ENST00000481223	2815	2657.45	0	0
ENST00000418865	3082	2882.39	0	0	ENST00000418865	3082	2904.53	0	0	ENST00000418865	3082	2896.97	0	0	ENST00000418865	3082	2924.45	0	0
ENST00000505849	1503	1303.39	0	0	ENST00000505849	1503	1325.53	0	0	ENST00000505849	1503	1317.97	0	0	ENST00000505849	1503	1345.45	0	0
ENST00000488340	1598	1398.39	0	0	ENST00000488340	1598	1420.53	0	0	ENST00000488340	1598	1412.97	0	0	ENST00000488340	1598	1440.45	0	0
ENST00000492998	745	547.032	0	0	ENST00000492998	745	568.21	0	0	ENST00000492998	745	560.841	0	0	ENST00000492998	745	588.151	0	0
ENST00000469113	707	509.503	0	0	ENST00000469113	707	531.041	0	0	ENST00000469113	707	523.539	0	0	ENST00000469113	707	550.265	0	0
ENST00000480646	614	418.99	0	0	ENST00000480646	614	439.598	0	0	ENST00000480646	614	432.431	0	0	ENST00000480646	614	458.004	0	0
ENST00000471930	846	647.384	0	0	ENST00000471930	846	669.024	0	0	ENST00000471930	846	661.246	0	0	ENST00000471930	846	688.832	0	0
ENST00000408918	1186	986.389	0	0	ENST00000408918	1186	1008.53	0	0	ENST00000408918	1186	1000.97	0	0	ENST00000408918	1186	1028.45	0	0
ENST00000473872	557	365.037	0	0	ENST00000473872	557	384.575	0	0	ENST00000473872	557	377.725	0	0	ENST00000473872	557	401.896	0	0
ENST00000425598	661	464.53	0	0	ENST00000425598	661	485.394	0	0	ENST00000425598	661	478.288	0	0	ENST00000425598	661	504.523	0	0
ENST00000463895	385	217.064	0	0	ENST00000463895	385	229.976	0	0	ENST00000463895	385	231.679	0	0	ENST00000463895	385	241.164	0	0
ENST00000497013	548	356.662	0	0	ENST00000497013	548	375.921	0	0	ENST00000497013	548	369.103	0	0	ENST00000497013	548	393.175	0	0
ENST00000448629	797	598.634	0	0	ENST00000448629	797	620.15	0	0	ENST00000448629	797	612.372	0	0	ENST00000448629	797	640.03	0	0
ENST00000444362	1747	1547.39	0	0	ENST00000444362	1747	1569.53	0	0	ENST00000444362	1747	1561.97	0	0	ENST00000444362	1747	1589.45	0	0
ENST00000418833	2196	1996.39	0	0	ENST00000418833	2196	2018.53	0	0	ENST00000418833	2196	2010.97	0	0	ENST00000418833	2196	2038.45	0	0
ENST00000576232	585	391.167	0	0	ENST00000576232	585	411.532	0	0	ENST00000576232	585	404.227	0	0	ENST00000576232	585	429.314	0	0
ENST00000570344	515	326.237	0	0	ENST00000570344	515	344.701	0	0	ENST00000570344	515	339.2	0	0	ENST00000570344	515	361.437	0	0
ENST00000447725	1843	1643.39	0	0	ENST00000447725	1843	1665.53	0	0	ENST00000447725	1843	1657.97	0	0	ENST00000447725	1843	1685.45	0	0
ENST00000572242	2228	2028.39	0	0	ENST00000572242	2228	2050.53	0	0	ENST00000572242	2228	2042.97	0	0	ENST00000572242	2228	2070.45	0	0
ENST00000453521	858	659.189	0	0	ENST00000453521	858	680.957	0	0	ENST00000453521	858	673.246	0	0	ENST00000453521	858	700.763	0	0
ENST00000344843	721	523.297	5	0.127405	ENST00000344843	721	544.824	0	0	ENST00000344843	721	537.114	0	0	ENST00000344843	721	564.21	0	0
ENST00000493287	504	316.46	0	0	ENST00000493287	504	334.495	0	0	ENST00000493287	504	329.189	0	0	ENST00000493287	504	351.118	0	0
ENST00000487659	1693	1493.39	0	0	ENST00000487659	1693	1515.53	0	0	ENST00000487659	1693	1507.97	0	0	ENST00000487659	1693	1535.45	0	0
ENST00000492508	588	393.929	0	0	ENST00000492508	588	414.532	0	0	ENST00000492508	588	407.105	0	0	ENST00000492508	588	432.271	0	0
ENST00000482352	1049	849.389	0	0	ENST00000482352	1049	871.527	0	0	ENST00000482352	1049	863.97	0	0	ENST00000482352	1049	891.452	0	0
ENST00000477686	314	164.379	0	0	ENST00000477686	314	176.12	0	0	ENST00000477686	314	176.496	0	0	ENST00000477686	314	180.439	0	0
ENST00000582431	293	150.863	0	0	ENST00000582431	293	161.901	0	0	ENST00000582431	293	161.21	0	0	ENST00000582431	293	163.594	0	0
ENST00000607307	1523	1323.39	0	0	ENST00000607307	1523	1345.53	0	0	ENST00000607307	1523	1337.97	0	0	ENST00000607307	1523	1365.45	0	0
ENST00000520296	1632	1432.39	0	0	ENST00000520296	1632	1454.53	0	0	ENST00000520296	1632	1446.97	0	0	ENST00000520296	1632	1474.45	0	0
ENST00000427211	1976	1776.39	0	0	ENST00000427211	1976	1798.53	0	0	ENST00000427211	1976	1790.97	0	0	ENST00000427211	1976	1818.45	0	0
ENST00000537107	2190	1990.39	0	0	ENST00000537107	2190	2012.53	0	0	ENST00000537107	2190	2004.97	0	0	ENST00000537107	2190	2032.45	0	0
ENST00000454272	1506	1306.39	0	0	ENST00000454272	1506	1328.53	0	0	ENST00000454272	1506	1320.97	0	0	ENST00000454272	1506	1348.45	0	0
ENST00000442470	876	677.056	0	0	ENST00000442470	876	698.749	0	0	ENST00000442470	876	691.11	0	0	ENST00000442470	876	718.692	0	0
ENST00000428932	543	352.167	0	0	ENST00000428932	543	371.072	0	0	ENST00000428932	543	364.735	0	0	ENST00000428932	543	388.371	0	0
ENST00000378821	492	305.836	0	0	ENST00000378821	492	323.268	0	0	ENST00000378821	492	318.884	0	0	ENST00000378821	492	339.572	0	0
ENST00000430109	510	321.936	0	0	ENST00000430109	510	340.188	0	0	ENST00000430109	510	334.578	0	0	ENST00000430109	510	356.69	0	0
ENST00000434150	444	263.953	0	0	ENST00000434150	444	280.422	0	0	ENST00000434150	444	277.86	0	0	ENST00000434150	444	294.539	0	0
ENST00000454562	424	247.814	0	0	ENST00000454562	424	262.997	0	0	ENST00000454562	424	261.868	0	0	ENST00000454562	424	276.261	0	0
ENST00000417917	634	438.341	0	0	ENST00000417917	634	459.009	0	0	ENST00000417917	634	452.033	0	0	ENST00000417917	634	477.721	0	0
ENST00000495558	819	620.573	0	0	ENST00000495558	819	642.024	0	0	ENST00000495558	819	634.309	0	0	ENST00000495558	819	661.899	0	0
ENST00000338660	2147	1947.39	0	0	ENST00000338660	2147	1969.53	0	0	ENST00000338660	2147	1961.97	0	0	ENST00000338660	2147	1989.45	0	0
ENST00000476993	4511	4311.39	0	0	ENST00000476993	4511	4333.53	0	0	ENST00000476993	4511	4325.97	0	0	ENST00000476993	4511	4353.45	0	0
ENST00000471398	458	275.884	0	0	ENST00000471398	458	292.908	0	0	ENST00000471398	458	289.337	0	0	ENST00000471398	458	307.403	0	0
ENST00000378785	3859	3659.39	0	0	ENST00000378785	3859	3681.53	0	0	ENST00000378785	3859	3673.97	0	0	ENST00000378785	3859	3701.45	1.91768	0.00535453
ENST00000475091	525	335.427	0	0	ENST00000475091	525	354.028	0	0	ENST00000475091	525	348.394	0	0	ENST00000475091	525	371.252	0	0
ENST00000484537	506	318.232	0	0	ENST00000484537	506	336.257	0	0	ENST00000484537	506	331.02	0	0	ENST00000484537	506	352.869	0	0
ENST00000308647	2448	2248.39	0	0	ENST00000308647	2448	2270.53	0	0	ENST00000308647	2448	2262.97	0	0	ENST00000308647	2448	2290.45	0	0
ENST00000472194	4314	4114.39	0	0	ENST00000472194	4314	4136.53	0	0	ENST00000472194	4314	4128.97	0	0	ENST00000472194	4314	4156.45	0	0
ENST00000378736	414	239.781	0	0	ENST00000378736	414	254.189	0	0	ENST00000378736	414	254.256	0	0	ENST00000378736	414	267.103	0	0
ENST00000485748	3233	3033.39	0	0	ENST00000485748	3233	3055.53	0	0	ENST00000485748	3233	3047.97	0	0	ENST00000485748	3233	3075.45	0	0
ENST00000474481	3367	3167.39	0	0	ENST00000474481	3367	3189.53	0	0	ENST00000474481	3367	3181.97	0	0	ENST00000474481	3367	3209.45	0	0
ENST00000378756	2492	2292.39	0	0	ENST00000378756	2492	2314.53	0	0	ENST00000378756	2492	2306.97	0	0	ENST00000378756	2492	2334.45	0	0
ENST00000378755	2612	2412.39	0	0	ENST00000378755	2612	2434.53	0	0	ENST00000378755	2612	2426.97	0	0	ENST00000378755	2612	2454.45	0	0
ENST00000339113	2330	2130.39	0	0	ENST00000339113	2330	2152.53	0	0	ENST00000339113	2330	2144.97	0	0	ENST00000339113	2330	2172.45	0	0
ENST00000536055	2332	2132.39	0	0	ENST00000536055	2332	2154.53	0	0	ENST00000536055	2332	2146.97	0	0	ENST00000536055	2332	2174.45	0	0
ENST00000439513	403	231.003	0	0	ENST00000439513	403	245.139	0	0	ENST00000439513	403	245.07	0	0	ENST00000439513	403	257.023	0	0
ENST00000429957	498	311.008	0	0	ENST00000429957	498	328.934	0	0	ENST00000429957	498	323.894	0	0	ENST00000429957	498	345.434	0	0
ENST00000400830	603	408.406	0	0	ENST00000400830	603	428.772	0	0	ENST00000400830	603	421.688	0	0	ENST00000400830	603	447.14	0	0
ENST00000378733	718	520.297	0	0	ENST00000378733	718	541.987	0	0	ENST00000378733	718	534.275	0	0	ENST00000378733	718	561.21	0	0
ENST00000425828	717	519.297	0	0	ENST00000425828	717	540.987	0	0	ENST00000425828	717	533.275	0	0	ENST00000425828	717	560.21	0	0
ENST00000624426	796	597.634	0	0	ENST00000624426	796	619.15	0	0	ENST00000624426	796	611.372	0	0	ENST00000624426	796	639.03	0	0
ENST00000291386	1290	1090.39	1	0.0122288	ENST00000291386	1290	1112.53	4.89301	0.0458395	ENST00000291386	1290	1104.97	0	0	ENST00000291386	1290	1132.45	0	0
ENST00000378726	2238	2038.39	0	0	ENST00000378726	2238	2060.53	0	0	ENST00000378726	2238	2052.97	0	0	ENST00000378726	2238	2080.45	0	0
ENST00000378725	619	423.862	0	0	ENST00000378725	619	444.553	0	0	ENST00000378725	619	437.301	0	0	ENST00000378725	619	462.911	0	0
ENST00000359060	4176	3976.39	2	0.00670665	ENST00000359060	4176	3998.53	2.10699	0.00549209	ENST00000359060	4176	3990.97	1	0.002586	ENST00000359060	4176	4018.45	13	0.033435
ENST00000366221	2101	1901.39	0	0	ENST00000366221	2101	1923.53	0	0	ENST00000366221	2101	1915.97	0	0	ENST00000366221	2101	1943.45	0	0
ENST00000624594	276	140.088	0	0	ENST00000624594	276	150.659	0	0	ENST00000624594	276	149.33	0	0	ENST00000624594	276	149.856	0	0
ENST00000621860	400	228.655	0	0	ENST00000621860	400	242.709	0	0	ENST00000621860	400	242.867	0	0	ENST00000621860	400	254.261	0	0
ENST00000629197	286	146.242	0	0	ENST00000629197	286	156.991	0	0	ENST00000629197	286	156.331	0	0	ENST00000629197	286	157.918	0	0
ENST00000422725	2085	1885.39	0	0	ENST00000422725	2085	1907.53	0	0	ENST00000422725	2085	1899.97	0	0	ENST00000422725	2085	1927.45	0	0
ENST00000607222	2038	1838.39	0	0	ENST00000607222	2038	1860.53	0	0	ENST00000607222	2038	1852.97	0	0	ENST00000607222	2038	1880.45	0	0
ENST00000520777	3321	3121.39	0	0	ENST00000520777	3321	3143.53	0	0	ENST00000520777	3321	3135.97	0	0	ENST00000520777	3321	3163.45	0	0
ENST00000355826	3290	3090.39	0	0	ENST00000355826	3290	3112.53	0	0	ENST00000355826	3290	3104.97	0	0	ENST00000355826	3290	3132.45	0	0
ENST00000518681	3116	2916.39	0	0	ENST00000518681	3116	2938.53	0	0	ENST00000518681	3116	2930.97	0	0	ENST00000518681	3116	2958.45	0	0
ENST00000505820	3305	3105.39	0	0	ENST00000505820	3305	3127.53	0	0	ENST00000505820	3305	3119.97	0	0	ENST00000505820	3305	3147.45	0	0
ENST00000479659	4247	4047.39	0	0	ENST00000479659	4247	4069.53	0	0	ENST00000479659	4247	4061.97	0	0	ENST00000479659	4247	4089.45	0	0
ENST00000489635	3034	2834.39	0	0	ENST00000489635	3034	2856.53	0	0	ENST00000489635	3034	2848.97	0	0	ENST00000489635	3034	2876.45	0	0
ENST00000511502	3326	3126.39	0	0	ENST00000511502	3326	3148.53	0	0	ENST00000511502	3326	3140.97	0	0	ENST00000511502	3326	3168.45	0	0
ENST00000477990	2821	2621.39	0	0	ENST00000477990	2821	2643.53	0	0	ENST00000477990	2821	2635.97	0	0	ENST00000477990	2821	2663.45	0	0
ENST00000514363	592	397.649	0	0	ENST00000514363	592	418.28	0	0	ENST00000514363	592	410.94	0	0	ENST00000514363	592	436.184	0	0
ENST00000487053	3252	3052.39	0	0	ENST00000487053	3252	3074.53	0	0	ENST00000487053	3252	3066.97	0	0	ENST00000487053	3252	3094.45	0	0
ENST00000502470	780	581.692	0	0	ENST00000502470	780	603.15	0	0	ENST00000502470	780	595.432	0	0	ENST00000502470	780	623.03	0	0
ENST00000378712	2890	2690.39	0	0	ENST00000378712	2890	2712.53	0	0	ENST00000378712	2890	2704.97	0	0	ENST00000378712	2890	2732.45	0	0
ENST00000507082	1578	1378.39	0	0	ENST00000507082	1578	1400.53	0	0	ENST00000507082	1578	1392.97	0	0	ENST00000507082	1578	1420.45	0	0
ENST00000463492	486	300.496	0	0	ENST00000463492	486	317.727	0	0	ENST00000463492	486	313.634	0	0	ENST00000463492	486	333.844	0	0
ENST00000510793	889	689.92	0	0	ENST00000510793	889	711.749	0	0	ENST00000510793	889	704.04	0	0	ENST00000510793	889	731.692	0	0
ENST00000504599	3311	3111.39	0	0	ENST00000504599	3311	3133.53	0	0	ENST00000504599	3311	3125.97	0	0	ENST00000504599	3311	3153.45	0	0
ENST00000507229	2582	2382.39	0	0	ENST00000507229	2582	2404.53	0	0	ENST00000507229	2582	2396.97	0	0	ENST00000507229	2582	2424.45	0	0
ENST00000503789	576	382.635	0	0	ENST00000503789	576	402.861	0	0	ENST00000503789	576	395.59	0	0	ENST00000503789	576	420.484	0	0
ENST00000378708	3012	2812.39	0	0	ENST00000378708	3012	2834.53	0	0	ENST00000378708	3012	2826.97	0	0	ENST00000378708	3012	2854.45	0	0
ENST00000506488	2997	2797.39	0	0	ENST00000506488	2997	2819.53	0	0	ENST00000506488	2997	2811.97	0	0	ENST00000506488	2997	2839.45	0	0
ENST00000512004	598	403.447	0	0	ENST00000512004	598	423.858	0	0	ENST00000512004	598	416.857	0	0	ENST00000512004	598	442.14	0	0
ENST00000508455	555	363.222	0	0	ENST00000508455	555	382.691	0	0	ENST00000508455	555	375.877	0	0	ENST00000508455	555	399.936	0	0
ENST00000514234	2562	2362.39	0	0	ENST00000514234	2562	2384.53	0	0	ENST00000514234	2562	2376.97	0	0	ENST00000514234	2562	2404.45	0	0
ENST00000467597	776	577.75	0	0	ENST00000467597	776	599.21	0	0	ENST00000467597	776	591.55	0	0	ENST00000467597	776	619.03	0	0
ENST00000508148	577	383.519	0	0	ENST00000508148	577	403.861	0	0	ENST00000508148	577	396.55	0	0	ENST00000508148	577	421.399	0	0
ENST00000486072	568	375.21	0	0	ENST00000486072	568	395.182	0	0	ENST00000486072	568	388.065	0	0	ENST00000486072	568	412.692	0	0
ENST00000505370	809	610.573	0	0	ENST00000505370	809	632.024	0	0	ENST00000505370	809	624.309	0	0	ENST00000505370	809	651.965	0	0
ENST00000473511	1332	1132.39	0	0	ENST00000473511	1332	1154.53	0	0	ENST00000473511	1332	1146.97	0	0	ENST00000473511	1332	1174.45	0	0
ENST00000464570	968	768.622	0	0	ENST00000464570	968	790.527	0	0	ENST00000464570	968	782.97	0	0	ENST00000464570	968	810.616	0	0
ENST00000483015	1058	858.389	0	0	ENST00000483015	1058	880.527	0	0	ENST00000483015	1058	872.97	0	0	ENST00000483015	1058	900.452	0	0
ENST00000511910	584	390.206	0	0	ENST00000511910	584	410.532	0	0	ENST00000511910	584	403.268	0	0	ENST00000511910	584	428.314	0	0
ENST00000470373	546	354.915	0	0	ENST00000470373	546	373.997	0	0	ENST00000470373	546	367.327	0	0	ENST00000470373	546	391.253	0	0
ENST00000356026	1326	1126.39	0	0	ENST00000356026	1326	1148.53	0	0	ENST00000356026	1326	1140.97	0	0	ENST00000356026	1326	1168.45	0	0
ENST00000472264	556	364.148	0	0	ENST00000472264	556	383.613	0	0	ENST00000472264	556	376.801	0	0	ENST00000472264	556	400.936	0	0
ENST00000512731	1531	1331.39	0	0	ENST00000512731	1531	1353.53	0	0	ENST00000512731	1531	1345.97	0	0	ENST00000512731	1531	1373.45	0	0
ENST00000378675	1309	1109.39	0	0	ENST00000378675	1309	1131.53	0	0	ENST00000378675	1309	1123.97	0	0	ENST00000378675	1309	1151.45	0	0
ENST00000618459	1308	1108.39	0	0	ENST00000618459	1308	1130.53	0	0	ENST00000618459	1308	1122.97	0	0	ENST00000618459	1308	1150.45	0	0
ENST00000412810	1239	1039.39	0	0	ENST00000412810	1239	1061.53	0	0	ENST00000412810	1239	1053.97	0	0	ENST00000412810	1239	1081.45	0	0
ENST00000479814	903	703.85	0	0	ENST00000479814	903	725.749	0	0	ENST00000479814	903	717.97	0	0	ENST00000479814	903	745.692	0	0
ENST00000435358	750	551.921	0	0	ENST00000435358	750	573.21	0	0	ENST00000435358	750	565.841	0	0	ENST00000435358	750	593.151	0	0
ENST00000503792	799	600.634	0	0	ENST00000503792	799	622.15	0	0	ENST00000503792	799	614.372	0	0	ENST00000503792	799	642.03	0	0
ENST00000489782	626	430.647	0	0	ENST00000489782	626	451.373	0	0	ENST00000489782	626	444.169	0	0	ENST00000489782	626	469.911	0	0
ENST00000486400	485	299.558	0	0	ENST00000486400	485	316.727	0	0	ENST00000486400	485	312.699	0	0	ENST00000486400	485	332.844	0	0
ENST00000490017	530	340.048	0	0	ENST00000490017	530	358.811	0	0	ENST00000490017	530	352.894	0	0	ENST00000490017	530	376.064	0	0
ENST00000341832	2998	2798.39	0	0	ENST00000341832	2998	2820.53	0	0	ENST00000341832	2998	2812.97	0	0	ENST00000341832	2998	2840.45	0	0
ENST00000407249	2677	2477.39	20.2578	0.109034	ENST00000407249	2677	2499.53	0	0	ENST00000407249	2677	2491.97	0	0	ENST00000407249	2677	2519.45	22.5469	0.0924907
ENST00000615951	2227	2027.39	0	0	ENST00000615951	2227	2049.53	21.321	0.108425	ENST00000615951	2227	2041.97	0	0	ENST00000615951	2227	2069.45	0	0
ENST00000340677	2534	2334.39	0	0	ENST00000340677	2534	2356.53	0	0	ENST00000340677	2534	2348.97	0	0	ENST00000340677	2534	2376.45	0	0
ENST00000611150	2350	2150.39	0	0	ENST00000611150	2350	2172.53	0	0	ENST00000611150	2350	2164.97	0	0	ENST00000611150	2350	2192.45	9.46194	0.0446033
ENST00000629289	2490	2290.39	0	0	ENST00000629289	2490	2312.53	0	0	ENST00000629289	2490	2304.97	0	0	ENST00000629289	2490	2332.45	0	0
ENST00000626918	2457	2257.39	0	0	ENST00000626918	2457	2279.53	0	0	ENST00000626918	2457	2271.97	0	0	ENST00000626918	2457	2299.45	0	0
ENST00000629312	2496	2296.39	0	0	ENST00000629312	2496	2318.53	0	0	ENST00000629312	2496	2310.97	0	0	ENST00000629312	2496	2338.45	0	0
ENST00000341028	881	681.988	6.30748	0.123323	ENST00000341028	881	703.749	19.896	0.294661	ENST00000341028	881	696.04	6	0.0889658	ENST00000341028	881	723.692	29.2879	0.418264
ENST00000607013	400	228.655	0	0	ENST00000607013	400	242.709	0	0	ENST00000607013	400	242.867	0	0	ENST00000607013	400	254.261	0	0
ENST00000614300	2156	1956.39	0	0	ENST00000614300	2156	1978.53	0	0	ENST00000614300	2156	1970.97	0	0	ENST00000614300	2156	1998.45	0	0
ENST00000617444	6283	6083.39	0	0	ENST00000617444	6283	6105.53	0	0	ENST00000617444	6283	6097.97	0	0	ENST00000617444	6283	6125.45	0	0
ENST00000611123	5948	5748.39	0	0	ENST00000611123	5948	5770.53	0	0	ENST00000611123	5948	5762.97	0	0	ENST00000611123	5948	5790.45	0	0
ENST00000480991	2860	2660.39	0	0	ENST00000480991	2860	2682.53	0	0	ENST00000480991	2860	2674.97	0	0	ENST00000480991	2860	2702.45	0	0
ENST00000481276	2199	1999.39	0	0	ENST00000481276	2199	2021.53	0	0	ENST00000481276	2199	2013.97	0	0	ENST00000481276	2199	2041.45	0	0
ENST00000596308	1422	1222.39	0	0	ENST00000596308	1422	1244.53	0	0	ENST00000596308	1422	1236.97	0	0	ENST00000596308	1422	1264.45	1	0.00817362
ENST00000597891	502	314.59	0	0	ENST00000597891	502	332.699	0	0	ENST00000597891	502	327.492	0	0	ENST00000597891	502	349.188	0	0
ENST00000234610	1017	817.389	0	0	ENST00000234610	1017	839.527	0	0	ENST00000234610	1017	831.97	0	0	ENST00000234610	1017	859.452	0	0
ENST00000356200	2653	2453.39	0	0	ENST00000356200	2653	2475.53	0	0	ENST00000356200	2653	2467.97	0	0	ENST00000356200	2653	2495.45	0	0
ENST00000463652	1028	828.389	0	0	ENST00000463652	1028	850.527	0	0	ENST00000463652	1028	842.97	0	0	ENST00000463652	1028	870.452	0	0
ENST00000356937	2275	2075.39	0	0	ENST00000356937	2275	2097.53	0	0	ENST00000356937	2275	2089.97	0	0	ENST00000356937	2275	2117.45	0	0
ENST00000378638	2429	2229.39	5.27329	0.0315399	ENST00000378638	2429	2251.53	0	0	ENST00000378638	2429	2243.97	5.58243	0.0256751	ENST00000378638	2429	2271.45	3.24704	0.0147741
ENST00000509982	2306	2106.39	0	0	ENST00000509982	2306	2128.53	18.5728	0.0909438	ENST00000509982	2306	2120.97	7.94406	0.0386558	ENST00000509982	2306	2148.45	0	0
ENST00000404249	2449	2249.39	0	0	ENST00000404249	2449	2271.53	1.41205e-07	6.47898e-10	ENST00000404249	2449	2263.97	0	0	ENST00000404249	2449	2291.45	0	0
ENST00000460465	2333	2133.39	0	0	ENST00000460465	2333	2155.53	0.00032899	1.59076e-06	ENST00000460465	2333	2147.97	0.000251602	1.2089e-06	ENST00000460465	2333	2175.45	25.0356	0.118939
ENST00000357760	2446	2246.39	0	0	ENST00000357760	2446	2268.53	0	0	ENST00000357760	2446	2260.97	0	0	ENST00000357760	2446	2288.45	0	0
ENST00000358779	2419	2219.39	4.31315e-06	2.59135e-08	ENST00000358779	2419	2241.53	0	0	ENST00000358779	2419	2233.97	0	0	ENST00000358779	2419	2261.45	0	0
ENST00000378633	2458	2258.39	0	0	ENST00000378633	2458	2280.53	0	0	ENST00000378633	2458	2272.97	0	0	ENST00000378633	2458	2300.45	0	0
ENST00000478901	931	731.85	0	0	ENST00000478901	931	753.527	0	0	ENST00000478901	931	745.97	0	0	ENST00000478901	931	773.616	0	0
ENST00000468397	836	637.384	0	0	ENST00000468397	836	659.024	0	0	ENST00000468397	836	651.246	0	0	ENST00000468397	836	678.832	0	0
ENST00000491311	626	430.647	0	0	ENST00000491311	626	451.373	0	0	ENST00000491311	626	444.169	0	0	ENST00000491311	626	469.911	0	0
ENST00000495016	286	146.242	0	0	ENST00000495016	286	156.991	0	0	ENST00000495016	286	156.331	0	0	ENST00000495016	286	157.918	0	0
ENST00000468800	897	697.92	0	0	ENST00000468800	897	719.749	0	0	ENST00000468800	897	711.97	0	0	ENST00000468800	897	739.692	0	0
ENST00000464748	381	214.072	0	0	ENST00000464748	381	226.761	0	0	ENST00000464748	381	228.497	0	0	ENST00000464748	381	237.664	0	0
ENST00000489300	577	383.519	0	0	ENST00000489300	577	403.861	0	0	ENST00000489300	577	396.55	0	0	ENST00000489300	577	421.399	0	0
ENST00000492390	976	776.468	0	0	ENST00000492390	976	798.527	0	0	ENST00000492390	976	790.97	0	0	ENST00000492390	976	818.535	0	0
ENST00000474916	752	553.921	0	0	ENST00000474916	752	575.21	0	0	ENST00000474916	752	567.841	0	0	ENST00000474916	752	595.151	0	0
ENST00000479362	700	502.655	3.16146	0.0838654	ENST00000479362	700	524.094	8.46563	0.168354	ENST00000479362	700	516.696	5.47326	0.109325	ENST00000479362	700	543.265	36.4899	0.694189
ENST00000498810	574	380.751	0	0	ENST00000498810	574	400.942	1.74415	0.0453396	ENST00000498810	574	393.749	0	0	ENST00000498810	574	418.484	0	0
ENST00000487462	437	258.474	0	0	ENST00000487462	437	274.375	0	0	ENST00000487462	437	272.195	0	0	ENST00000487462	437	287.985	0	0
ENST00000401096	450	268.915	0	0	ENST00000401096	450	285.718	0	0	ENST00000401096	450	282.564	0	0	ENST00000401096	450	300.207	0	0
ENST00000598846	5079	4879.39	0	0	ENST00000598846	5079	4901.53	0	0	ENST00000598846	5079	4893.97	0	0	ENST00000598846	5079	4921.45	2.93068	0.00615448
ENST00000577672	409	235.864	0	0	ENST00000577672	409	249.986	0	0	ENST00000577672	409	250.048	0	0	ENST00000577672	409	262.567	0	0
ENST00000417099	1808	1608.39	0	0	ENST00000417099	1808	1630.53	0	0	ENST00000417099	1808	1622.97	0	0	ENST00000417099	1808	1650.45	0	0
ENST00000424604	450	268.915	0	0	ENST00000424604	450	285.718	0	0	ENST00000424604	450	282.564	0	0	ENST00000424604	450	300.207	0	0
ENST00000418950	497	310.104	0	0	ENST00000418950	497	328.102	0	0	ENST00000418950	497	323.193	0	0	ENST00000418950	497	344.434	0	0
ENST00000355439	2078	1878.39	0	0	ENST00000355439	2078	1900.53	0	0	ENST00000355439	2078	1892.97	0	0	ENST00000355439	2078	1920.45	0	0
ENST00000475229	1259	1059.39	2	0.0251732	ENST00000475229	1259	1081.53	0	0	ENST00000475229	1259	1073.97	0	0	ENST00000475229	1259	1101.45	0	0
ENST00000246421	1430	1230.39	0	0	ENST00000246421	1430	1252.53	0	0	ENST00000246421	1430	1244.97	0	0	ENST00000246421	1430	1272.45	5	0.0406111
ENST00000341426	3235	3035.39	0	0	ENST00000341426	3235	3057.53	0	0	ENST00000341426	3235	3049.97	0	0	ENST00000341426	3235	3077.45	0	0
ENST00000341991	3098	2898.39	0	0	ENST00000341991	3098	2920.53	0	0	ENST00000341991	3098	2912.97	0	0	ENST00000341991	3098	2940.45	0	0
ENST00000378625	3653	3453.39	0	0	ENST00000378625	3653	3475.53	0	0	ENST00000378625	3653	3467.97	0	0	ENST00000378625	3653	3495.45	0	0
ENST00000342348	1722	1522.39	0	0	ENST00000342348	1722	1544.53	0	0	ENST00000342348	1722	1536.97	0	0	ENST00000342348	1722	1564.45	0	0
ENST00000498806	269	135.999	0	0	ENST00000498806	269	146.167	0	0	ENST00000498806	269	144.244	0	0	ENST00000498806	269	143.986	0	0
ENST00000469045	890	690.92	0	0	ENST00000469045	890	712.749	0	0	ENST00000469045	890	705.04	0	0	ENST00000469045	890	732.692	0	0
ENST00000480499	549	357.662	0	0	ENST00000480499	549	376.921	0	0	ENST00000480499	549	369.991	0	0	ENST00000480499	549	394.096	0	0
ENST00000497747	467	283.801	0	0	ENST00000497747	467	300.839	0	0	ENST00000497747	467	297.112	0	0	ENST00000497747	467	315.896	0	0
ENST00000477235	1004	804.389	0	0	ENST00000477235	1004	826.527	0	0	ENST00000477235	1004	818.97	0	0	ENST00000477235	1004	846.452	0	0
ENST00000489538	475	290.787	0	0	ENST00000489538	475	307.651	0	0	ENST00000489538	475	304.457	0	0	ENST00000489538	475	323.441	0	0
ENST00000497615	534	343.628	0	0	ENST00000497615	534	362.592	0	0	ENST00000497615	534	356.355	0	0	ENST00000497615	534	379.874	0	0
ENST00000497186	683	486.051	0	0	ENST00000497186	683	507.197	0	0	ENST00000497186	683	499.747	0	0	ENST00000497186	683	526.319	0	0
ENST00000492845	937	737.85	0	0	ENST00000492845	937	759.527	0	0	ENST00000492845	937	751.97	0	0	ENST00000492845	937	779.616	0	0
ENST00000492768	859	660.189	0	0	ENST00000492768	859	681.957	0	0	ENST00000492768	859	674.246	0	0	ENST00000492768	859	701.763	0	0
ENST00000460602	974	774.468	0	0	ENST00000460602	974	796.527	0	0	ENST00000460602	974	788.97	0	0	ENST00000460602	974	816.535	0	0
ENST00000464373	722	524.297	0	0	ENST00000464373	722	545.77	0	0	ENST00000464373	722	538.114	0	0	ENST00000464373	722	565.21	0	0
ENST00000480542	341	183.573	0	0	ENST00000480542	341	195.565	0	0	ENST00000480542	341	196.843	0	0	ENST00000480542	341	203.046	0	0
ENST00000610897	3145	2945.39	0.0185157	8.38228e-05	ENST00000610897	3145	2967.53	0	0	ENST00000610897	3145	2959.97	0	0	ENST00000610897	3145	2987.45	0	0
ENST00000615252	3048	2848.39	0	0	ENST00000615252	3048	2870.53	4	0.0145236	ENST00000615252	3048	2862.97	12	0.0432585	ENST00000615252	3048	2890.45	4	0.0143025
ENST00000378609	3132	2932.39	1.14284	0.00519671	ENST00000378609	3132	2954.53	0	0	ENST00000378609	3132	2946.97	0	0	ENST00000378609	3132	2974.45	0	0
ENST00000461893	2438	2238.39	0	0	ENST00000461893	2438	2260.53	0	0	ENST00000461893	2438	2252.97	0	0	ENST00000461893	2438	2280.45	0	0
ENST00000471354	1512	1312.39	0	0	ENST00000471354	1512	1334.53	0	0	ENST00000471354	1512	1326.97	0	0	ENST00000471354	1512	1354.45	1	0.0076305
ENST00000439272	602	407.447	1.83864	0.0601716	ENST00000439272	602	427.772	0	0	ENST00000439272	602	420.688	0	0	ENST00000439272	602	446.14	0	0
ENST00000434686	684	487.051	0	0	ENST00000434686	684	508.197	0	0	ENST00000434686	684	500.747	0	0	ENST00000434686	684	527.319	0	0
ENST00000437146	423	246.947	0	0	ENST00000437146	423	262.107	0	0	ENST00000437146	423	261.12	0	0	ENST00000437146	423	275.431	0	0
ENST00000607589	567	374.21	0	0	ENST00000607589	567	394.182	0	0	ENST00000607589	567	387.104	0	0	ENST00000607589	567	411.692	0	0
ENST00000472614	708	510.503	0	0	ENST00000472614	708	532.041	0	0	ENST00000472614	708	524.487	0	0	ENST00000472614	708	551.265	0	0
ENST00000412228	906	706.85	0	0	ENST00000412228	906	728.749	0	0	ENST00000412228	906	720.97	0	0	ENST00000412228	906	748.692	0	0
ENST00000307786	1101	901.389	0	0	ENST00000307786	1101	923.527	0	0	ENST00000307786	1101	915.97	0	0	ENST00000307786	1101	943.452	0	0
ENST00000378604	769	570.865	0	0	ENST00000378604	769	592.21	0	0	ENST00000378604	769	584.668	0	0	ENST00000378604	769	612.03	0	0
ENST00000482402	1882	1682.39	0	0	ENST00000482402	1882	1704.53	0	0	ENST00000482402	1882	1696.97	0	0	ENST00000482402	1882	1724.45	0	0
ENST00000462293	570	377.134	0	0	ENST00000462293	570	397.063	0	0	ENST00000462293	570	390.065	0	0	ENST00000462293	570	414.609	0	0
ENST00000378602	1118	918.389	0	0	ENST00000378602	1118	940.527	0	0	ENST00000378602	1118	932.97	0	0	ENST00000378602	1118	960.452	0	0
ENST00000310991	929	729.85	0	0	ENST00000310991	929	751.602	0	0	ENST00000310991	929	743.97	0	0	ENST00000310991	929	771.616	0	0
ENST00000378598	483	297.929	0	0	ENST00000378598	483	314.856	0	0	ENST00000378598	483	311.214	0	0	ENST00000378598	483	330.978	0	0
ENST00000470931	690	492.855	0	0	ENST00000470931	690	514.146	0	0	ENST00000470931	690	506.747	0	0	ENST00000470931	690	533.319	0	0
ENST00000602604	878	679.056	0	0	ENST00000602604	878	700.749	0	0	ENST00000602604	878	693.04	0	0	ENST00000602604	878	720.692	0	0
ENST00000416272	313	163.721	0	0	ENST00000416272	313	175.491	0	0	ENST00000416272	313	175.686	0	0	ENST00000416272	313	179.636	0	0
ENST00000493964	5247	5047.39	0	0	ENST00000493964	5247	5069.53	0	0	ENST00000493964	5247	5061.97	0	0	ENST00000493964	5247	5089.45	0	0
ENST00000464311	2756	2556.39	0	0	ENST00000464311	2756	2578.53	0	0	ENST00000464311	2756	2570.97	0	0	ENST00000464311	2756	2598.45	0	0
ENST00000412120	1972	1772.39	0	0	ENST00000412120	1972	1794.53	0	0	ENST00000412120	1972	1786.97	0	0	ENST00000412120	1972	1814.45	0	0
ENST00000493316	550	358.662	0	0	ENST00000493316	550	377.921	0	0	ENST00000493316	550	370.953	0	0	ENST00000493316	550	395.096	0	0
ENST00000270720	4710	4510.39	0	0	ENST00000270720	4710	4532.53	0	0	ENST00000270720	4710	4524.97	0	0	ENST00000270720	4710	4552.45	0	0
ENST00000468610	2585	2385.39	0	0	ENST00000468610	2585	2407.53	0	0	ENST00000468610	2585	2399.97	0	0	ENST00000468610	2585	2427.45	0	0
ENST00000461752	540	349.346	0	0	ENST00000461752	540	368.222	0	0	ENST00000461752	540	361.809	0	0	ENST00000461752	540	385.605	0	0
ENST00000378592	2145	1945.39	0	0	ENST00000378592	2145	1967.53	0	0	ENST00000378592	2145	1959.97	0	0	ENST00000378592	2145	1987.45	0	0
ENST00000378590	441	261.592	0	0	ENST00000378590	441	277.886	0	0	ENST00000378590	441	275.297	0	0	ENST00000378590	441	291.689	1	0.0354321
ENST00000443930	1954	1754.39	0	0	ENST00000443930	1954	1776.53	0	0	ENST00000443930	1954	1768.97	0	0	ENST00000443930	1954	1796.45	0	0
ENST00000378585	1928	1728.39	0	0	ENST00000378585	1928	1750.53	0	0	ENST00000378585	1928	1742.97	0	0	ENST00000378585	1928	1770.45	0	0
ENST00000445600	320	168.82	0	0	ENST00000445600	320	180.155	0	0	ENST00000445600	320	180.957	0	0	ENST00000445600	320	185.324	0	0
ENST00000449154	437	258.474	0	0	ENST00000449154	437	274.375	0	0	ENST00000449154	437	272.195	0	0	ENST00000449154	437	287.985	0	0
ENST00000378567	2326	2126.39	0	0	ENST00000378567	2326	2148.53	0	0	ENST00000378567	2326	2140.97	0	0	ENST00000378567	2326	2168.45	0	0
ENST00000468310	690	492.855	0	0	ENST00000468310	690	514.146	0	0	ENST00000468310	690	506.747	0	0	ENST00000468310	690	533.319	0	0
ENST00000484419	519	329.801	0	0	ENST00000484419	519	348.419	0	0	ENST00000484419	519	342.887	0	0	ENST00000484419	519	365.364	0	0
ENST00000503297	468	284.594	0	0	ENST00000503297	468	301.839	0	0	ENST00000503297	468	298.02	0	0	ENST00000503297	468	316.864	0	0
ENST00000479566	501	313.622	0	0	ENST00000479566	501	331.766	0	0	ENST00000479566	501	326.76	0	0	ENST00000479566	501	348.259	0	0
ENST00000466651	425	248.549	0	0	ENST00000466651	425	263.886	0	0	ENST00000466651	425	262.7	0	0	ENST00000466651	425	277.261	0	0
ENST00000400921	2294	2094.39	0	0	ENST00000400921	2294	2116.53	0	0	ENST00000400921	2294	2108.97	0	0	ENST00000400921	2294	2136.45	0	0
ENST00000495347	698	500.706	0	0	ENST00000495347	698	522.094	0	0	ENST00000495347	698	514.696	0	0	ENST00000495347	698	541.265	0	0
ENST00000461106	1916	1716.39	0	0	ENST00000461106	1916	1738.53	0	0	ENST00000461106	1916	1730.97	0	0	ENST00000461106	1916	1758.45	0	0
ENST00000461465	480	295.298	0	0	ENST00000461465	480	312.112	0	0	ENST00000461465	480	308.663	0	0	ENST00000461465	480	328.112	0	0
ENST00000470596	788	589.634	0	0	ENST00000470596	788	611.15	0	0	ENST00000470596	788	603.372	0	0	ENST00000470596	788	631.03	0	0
ENST00000496325	563	370.664	0	0	ENST00000496325	563	390.301	0	0	ENST00000496325	563	383.493	0	0	ENST00000496325	563	407.774	0	0
ENST00000481140	713	515.297	0	0	ENST00000481140	713	537.041	0	0	ENST00000481140	713	529.328	0	0	ENST00000481140	713	556.21	0	0
ENST00000482686	614	418.99	0	0	ENST00000482686	614	439.598	0	0	ENST00000482686	614	432.431	0	0	ENST00000482686	614	458.004	0	0
ENST00000400920	2009	1809.39	0	0	ENST00000400920	2009	1831.53	0	0	ENST00000400920	2009	1823.97	0	0	ENST00000400920	2009	1851.45	0	0
ENST00000486681	966	766.699	0	0	ENST00000486681	966	788.527	0	0	ENST00000486681	966	780.97	0	0	ENST00000486681	966	808.616	0	0
ENST00000470986	706	508.605	0	0	ENST00000470986	706	530.041	0	0	ENST00000470986	706	522.644	0	0	ENST00000470986	706	549.265	0	0
ENST00000470511	567	374.21	0	0	ENST00000470511	567	394.182	0	0	ENST00000470511	567	387.104	0	0	ENST00000470511	567	411.692	0	0
ENST00000471018	716	518.297	0	0	ENST00000471018	716	539.987	0	0	ENST00000471018	716	532.328	0	0	ENST00000471018	716	559.21	0	0
ENST00000466352	564	371.589	0	0	ENST00000466352	564	391.222	0	0	ENST00000466352	564	384.377	0	0	ENST00000466352	564	408.774	0	0
ENST00000497183	763	564.865	0	0	ENST00000497183	763	586.21	0	0	ENST00000497183	763	578.726	0	0	ENST00000497183	763	606.151	0	0
ENST00000419838	347	188.103	0	0	ENST00000419838	347	200.039	0	0	ENST00000419838	347	201.533	0	0	ENST00000419838	347	208.125	0	0
ENST00000479263	1747	1547.39	0	0	ENST00000479263	1747	1569.53	0	0	ENST00000479263	1747	1561.97	0	0	ENST00000479263	1747	1589.45	0	0
ENST00000503672	1213	1013.39	0	0	ENST00000503672	1213	1035.53	0	0	ENST00000503672	1213	1027.97	0	0	ENST00000503672	1213	1055.45	0	0
ENST00000478770	1542	1342.39	0	0	ENST00000478770	1542	1364.53	0	0	ENST00000478770	1542	1356.97	0	0	ENST00000478770	1542	1384.45	0	0
ENST00000505322	1859	1659.39	0	0	ENST00000505322	1859	1681.53	0	0	ENST00000505322	1859	1673.97	0	0	ENST00000505322	1859	1701.45	0	0
ENST00000472017	602	407.447	0	0	ENST00000472017	602	427.772	0	0	ENST00000472017	602	420.688	0	0	ENST00000472017	602	446.14	0	0
ENST00000606533	4196	3996.39	0	0	ENST00000606533	4196	4018.53	0	0	ENST00000606533	4196	4010.97	0	0	ENST00000606533	4196	4038.45	0	0
ENST00000333854	1253	1053.39	0	0	ENST00000333854	1253	1075.53	0	0	ENST00000333854	1253	1067.97	0	0	ENST00000333854	1253	1095.45	0	0
ENST00000444529	622	426.776	0	0	ENST00000444529	622	447.464	0	0	ENST00000444529	622	440.169	0	0	ENST00000444529	622	465.911	0	0
ENST00000400919	1413	1213.39	0	0	ENST00000400919	1413	1235.53	0	0	ENST00000400919	1413	1227.97	0	0	ENST00000400919	1413	1255.45	0	0
ENST00000469733	2280	2080.39	0	0	ENST00000469733	2280	2102.53	0	0	ENST00000469733	2280	2094.97	0	0	ENST00000469733	2280	2122.45	0	0
ENST00000428120	2313	2113.39	0	0	ENST00000428120	2313	2135.53	0	0	ENST00000428120	2313	2127.97	0	0	ENST00000428120	2313	2155.45	0	0
ENST00000414253	2216	2016.39	0	0	ENST00000414253	2216	2038.53	0	0	ENST00000414253	2216	2030.97	0	0	ENST00000414253	2216	2058.45	0	0
ENST00000400918	811	612.573	0	0	ENST00000400918	811	634.024	0	0	ENST00000400918	811	626.309	0	0	ENST00000400918	811	653.965	0	0
ENST00000497675	4478	4278.39	0	0	ENST00000497675	4478	4300.53	0	0	ENST00000497675	4478	4292.97	0	0	ENST00000497675	4478	4320.45	0	0
ENST00000378543	569	376.134	0	0	ENST00000378543	569	396.103	0	0	ENST00000378543	569	389.065	0	0	ENST00000378543	569	413.651	0	0
ENST00000378546	729	531.192	0	0	ENST00000378546	729	552.66	0	0	ENST00000378546	729	545.006	0	0	ENST00000378546	729	572.21	0	0
ENST00000401813	2543	2343.39	0	0	ENST00000401813	2543	2365.53	0	0	ENST00000401813	2543	2357.97	0	0	ENST00000401813	2543	2385.45	0	0
ENST00000487186	3576	3376.39	0	0	ENST00000487186	3576	3398.53	0	0	ENST00000487186	3576	3390.97	0	0	ENST00000487186	3576	3418.45	0	0
ENST00000476803	701	503.655	0	0	ENST00000476803	701	525.094	0	0	ENST00000476803	701	517.696	0	0	ENST00000476803	701	544.265	0	0
ENST00000440825	855	656.189	0	0	ENST00000440825	855	677.957	0	0	ENST00000440825	855	670.246	0	0	ENST00000440825	855	697.763	0	0
ENST00000420515	1544	1344.39	0	0	ENST00000420515	1544	1366.53	0	0	ENST00000420515	1544	1358.97	0	0	ENST00000420515	1544	1386.45	0	0
ENST00000514625	703	505.605	0	0	ENST00000514625	703	527.094	0	0	ENST00000514625	703	519.696	0	0	ENST00000514625	703	546.265	0	0
ENST00000420964	314	164.379	0	0	ENST00000420964	314	176.12	0	0	ENST00000420964	314	176.496	0	0	ENST00000420964	314	180.439	0	0
ENST00000442483	326	172.946	0	0	ENST00000442483	326	184.351	0	0	ENST00000442483	326	185.29	0	0	ENST00000442483	326	190.327	0	0
ENST00000621422	74	24.6244	0	0	ENST00000621422	74	28.6936	0	0	ENST00000621422	74	24.1892	0	0	ENST00000621422	74	22.4114	0	0
ENST00000378536	5613	5413.39	0	0	ENST00000378536	5613	5435.53	0	0	ENST00000378536	5613	5427.97	0	0	ENST00000378536	5613	5455.45	0	0
ENST00000508416	252	125.921	0	0	ENST00000508416	252	135.855	0	0	ENST00000508416	252	132.853	0	0	ENST00000508416	252	131.049	0	0
ENST00000478223	294	151.457	0	0	ENST00000478223	294	162.625	0	0	ENST00000478223	294	161.93	0	0	ENST00000478223	294	164.41	0	0
ENST00000507179	539	348.382	0	0	ENST00000507179	539	367.297	0	0	ENST00000507179	539	360.919	0	0	ENST00000507179	539	384.605	0	0
ENST00000378531	1798	1598.39	0	0	ENST00000378531	1798	1620.53	0	0	ENST00000378531	1798	1612.97	0	0	ENST00000378531	1798	1640.45	0	0
ENST00000606372	1960	1760.39	0	0	ENST00000606372	1960	1782.53	0	0	ENST00000606372	1960	1774.97	0	0	ENST00000606372	1960	1802.45	0	0
ENST00000378529	1500	1300.39	0	0	ENST00000378529	1500	1322.53	0	0	ENST00000378529	1500	1314.97	0	0	ENST00000378529	1500	1342.45	0	0
ENST00000607342	566	373.4	0	0	ENST00000607342	566	393.222	0	0	ENST00000607342	566	386.143	0	0	ENST00000607342	566	410.733	0	0
ENST00000469374	1907	1707.39	0	0	ENST00000469374	1907	1729.53	0	0	ENST00000469374	1907	1721.97	0	0	ENST00000469374	1907	1749.45	0	0
ENST00000419785	582	388.246	0	0	ENST00000419785	582	408.655	0	0	ENST00000419785	582	401.349	0	0	ENST00000419785	582	426.314	0	0
ENST00000449373	4764	4564.39	0	0	ENST00000449373	4764	4586.53	0	0	ENST00000449373	4764	4578.97	0	0	ENST00000449373	4764	4606.45	0	0
ENST00000378525	1648	1448.39	0	0	ENST00000378525	1648	1470.53	0	0	ENST00000378525	1648	1462.97	0	0	ENST00000378525	1648	1490.45	0	0
ENST00000607031	3138	2938.39	0	0	ENST00000607031	3138	2960.53	0	0	ENST00000607031	3138	2952.97	0	0	ENST00000607031	3138	2980.45	0	0
ENST00000475812	552	360.443	0	0	ENST00000475812	552	379.883	0	0	ENST00000475812	552	372.953	0	0	ENST00000475812	552	396.976	0	0
ENST00000494279	406	233.245	0	0	ENST00000494279	406	247.566	0	0	ENST00000494279	406	247.696	0	0	ENST00000494279	406	259.836	0	0
ENST00000607720	493	306.678	0	0	ENST00000607720	493	324.201	0	0	ENST00000607720	493	319.72	0	0	ENST00000607720	493	340.572	0	0
ENST00000602865	2407	2207.39	0	0	ENST00000602865	2407	2229.53	0	0	ENST00000602865	2407	2221.97	0	0	ENST00000602865	2407	2249.45	0	0
ENST00000417061	214	105.797	0	0	ENST00000417061	214	114.682	0	0	ENST00000417061	214	108.706	0	0	ENST00000417061	214	104.015	0	0
ENST00000607858	568	375.21	0	0	ENST00000607858	568	395.182	0	0	ENST00000607858	568	388.065	0	0	ENST00000607858	568	412.692	0	0
ENST00000378513	3000	2800.39	0	0	ENST00000378513	3000	2822.53	0	0	ENST00000378513	3000	2814.97	0	0	ENST00000378513	3000	2842.45	0	0
ENST00000378518	522	332.564	0	0	ENST00000378518	522	351.207	0	0	ENST00000378518	522	345.535	2	0.0597371	ENST00000378518	522	368.327	0	0
ENST00000630837	1348	1148.39	0	0	ENST00000630837	1348	1170.53	0	0	ENST00000630837	1348	1162.97	0	0	ENST00000630837	1348	1190.45	0	0
ENST00000605895	3044	2844.39	0	0	ENST00000605895	3044	2866.53	0	0	ENST00000605895	3044	2858.97	0	0	ENST00000605895	3044	2886.45	0	0
ENST00000306256	695	497.806	0	0	ENST00000306256	695	519.094	0	0	ENST00000306256	695	511.696	0	0	ENST00000306256	695	538.319	0	0
ENST00000493207	686	488.904	0	0	ENST00000493207	686	510.146	0	0	ENST00000493207	686	502.747	0	0	ENST00000493207	686	529.319	0	0
ENST00000378512	1404	1204.39	0	0	ENST00000378512	1404	1226.53	1	0.00849762	ENST00000378512	1404	1218.97	0	0	ENST00000378512	1404	1246.45	0	0
ENST00000443438	540	349.346	0	0	ENST00000443438	540	368.222	0	0	ENST00000443438	540	361.809	0	0	ENST00000443438	540	385.605	0	0
ENST00000488353	2469	2269.39	0	0	ENST00000488353	2469	2291.53	0	0	ENST00000488353	2469	2283.97	0	0	ENST00000488353	2469	2311.45	0	0
ENST00000462129	585	391.167	0	0	ENST00000462129	585	411.532	0	0	ENST00000462129	585	404.227	0	0	ENST00000462129	585	429.314	0	0
ENST00000288774	2871	2671.39	0	0	ENST00000288774	2871	2693.53	0	0	ENST00000288774	2871	2685.97	0	0	ENST00000288774	2871	2713.45	0	0
ENST00000447513	1997	1797.39	0	0	ENST00000447513	1997	1819.53	0	0	ENST00000447513	1997	1811.97	0	0	ENST00000447513	1997	1839.45	0	0
ENST00000507596	1941	1741.39	0	0	ENST00000507596	1941	1763.53	0	0	ENST00000507596	1941	1755.97	0	0	ENST00000507596	1941	1783.45	0	0
ENST00000510434	907	707.85	0	0	ENST00000510434	907	729.749	0	0	ENST00000510434	907	721.97	0	0	ENST00000510434	907	749.692	0	0
ENST00000508384	611	416.116	0	0	ENST00000508384	611	436.642	0	0	ENST00000508384	611	429.475	0	0	ENST00000508384	611	455.004	0	0
ENST00000515760	603	408.406	0	0	ENST00000515760	603	428.772	0	0	ENST00000515760	603	421.688	0	0	ENST00000515760	603	447.14	0	0
ENST00000502666	653	456.623	0	0	ENST00000502666	653	477.586	0	0	ENST00000502666	653	470.478	0	0	ENST00000502666	653	496.574	0	0
ENST00000514502	548	356.662	0	0	ENST00000514502	548	375.921	0	0	ENST00000514502	548	369.103	0	0	ENST00000514502	548	393.175	0	0
ENST00000609981	568	375.21	0	0	ENST00000609981	568	395.182	0	0	ENST00000609981	568	388.065	0	0	ENST00000609981	568	412.692	0	0
ENST00000449969	5450	5250.39	0	0	ENST00000449969	5450	5272.53	0	0	ENST00000449969	5450	5264.97	0	0	ENST00000449969	5450	5292.45	0	0
ENST00000419816	4837	4637.39	0	0	ENST00000419816	4837	4659.53	0	0	ENST00000419816	4837	4651.97	0	0	ENST00000419816	4837	4679.45	0	0
ENST00000378486	4837	4637.39	0	0	ENST00000378486	4837	4659.53	0	0	ENST00000378486	4837	4651.97	0	0	ENST00000378486	4837	4679.45	0	0
ENST00000343889	6453	6253.39	0	0	ENST00000343889	6453	6275.53	0	0	ENST00000343889	6453	6267.97	0	0	ENST00000343889	6453	6295.45	0	0
ENST00000278878	3781	3581.39	0	0	ENST00000278878	3781	3603.53	0	0	ENST00000278878	3781	3595.97	0	0	ENST00000278878	3781	3623.45	0	0
ENST00000473964	6986	6786.39	0	0	ENST00000473964	6986	6808.53	0	0	ENST00000473964	6986	6800.97	0	0	ENST00000473964	6986	6828.45	0	0
ENST00000462379	2341	2141.39	0	0	ENST00000462379	2341	2163.53	0	0	ENST00000462379	2341	2155.97	0	0	ENST00000462379	2341	2183.45	0	0
ENST00000424657	455	273.23	0	0	ENST00000424657	455	290.33	0	0	ENST00000424657	455	286.758	0	0	ENST00000424657	455	304.714	0	0
ENST00000442305	514	325.304	0	0	ENST00000442305	514	343.841	0	0	ENST00000442305	514	338.269	0	0	ENST00000442305	514	360.473	0	0
ENST00000378466	2677	2477.39	0	0	ENST00000378466	2677	2499.53	0	0	ENST00000378466	2677	2491.97	0	0	ENST00000378466	2677	2519.45	0	0
ENST00000435556	2524	2324.39	0	0	ENST00000435556	2524	2346.53	0	0	ENST00000435556	2524	2338.97	0	0	ENST00000435556	2524	2366.45	0	0
ENST00000505228	1913	1713.39	0	0	ENST00000505228	1913	1735.53	0	0	ENST00000505228	1913	1727.97	0	0	ENST00000505228	1913	1755.45	0	0
ENST00000502512	706	508.605	0	0	ENST00000502512	706	530.041	0	0	ENST00000502512	706	522.644	0	0	ENST00000502512	706	549.265	0	0
ENST00000471361	722	524.297	0	0	ENST00000471361	722	545.77	0	0	ENST00000471361	722	538.114	0	0	ENST00000471361	722	565.21	0	0
ENST00000487804	718	520.297	0	0	ENST00000487804	718	541.987	0	0	ENST00000487804	718	534.275	0	0	ENST00000487804	718	561.21	0	0
ENST00000515423	430	252.506	0	0	ENST00000515423	430	268.08	0	0	ENST00000515423	430	266.655	0	0	ENST00000515423	430	281.774	0	0
ENST00000468002	670	473.436	0	0	ENST00000468002	670	494.247	0	0	ENST00000468002	670	487.144	0	0	ENST00000468002	670	513.371	0	0
ENST00000486396	879	680.056	0	0	ENST00000486396	879	701.749	0	0	ENST00000486396	879	694.04	0	0	ENST00000486396	879	721.692	0	0
ENST00000502770	1041	841.389	0	0	ENST00000502770	1041	863.527	0	0	ENST00000502770	1041	855.97	0	0	ENST00000502770	1041	883.452	0	0
ENST00000491212	725	527.245	0	0	ENST00000491212	725	548.66	0	0	ENST00000491212	725	541.06	0	0	ENST00000491212	725	568.21	0	0
ENST00000514922	568	375.21	0	0	ENST00000514922	568	395.182	0	0	ENST00000514922	568	388.065	0	0	ENST00000514922	568	412.692	0	0
ENST00000378453	1306	1106.39	0	0	ENST00000378453	1306	1128.53	0	0	ENST00000378453	1306	1120.97	0	0	ENST00000378453	1306	1148.45	0	0
ENST00000606645	996	796.389	0	0	ENST00000606645	996	818.527	0	0	ENST00000606645	996	810.97	0	0	ENST00000606645	996	838.452	0	0
ENST00000449660	1629	1429.39	0	0	ENST00000449660	1629	1451.53	0	0	ENST00000449660	1629	1443.97	0	0	ENST00000449660	1629	1471.45	0	0
ENST00000443892	500	312.719	0	0	ENST00000443892	500	330.8	0	0	ENST00000443892	500	325.827	0	0	ENST00000443892	500	347.294	0	0
ENST00000416860	3522	3322.39	0	0	ENST00000416860	3522	3344.53	0	0	ENST00000416860	3522	3336.97	0	0	ENST00000416860	3522	3364.45	0	0
ENST00000448624	808	609.573	0	0	ENST00000448624	808	631.024	0	0	ENST00000448624	808	623.309	0	0	ENST00000448624	808	650.965	0	0
ENST00000432521	3608	3408.39	0	0	ENST00000432521	3608	3430.53	0	0	ENST00000432521	3608	3422.97	0	0	ENST00000432521	3608	3450.45	0	0
ENST00000452793	569	376.134	0	0	ENST00000452793	569	396.103	0	0	ENST00000452793	569	389.065	0	0	ENST00000452793	569	413.651	0	0
ENST00000426449	660	463.53	0	0	ENST00000426449	660	484.394	0	0	ENST00000426449	660	477.288	0	0	ENST00000426449	660	503.574	0	0
ENST00000434817	834	635.384	0	0	ENST00000434817	834	657.024	0	0	ENST00000434817	834	649.246	0	0	ENST00000434817	834	676.832	0	0
ENST00000435221	1225	1025.39	0	0	ENST00000435221	1225	1047.53	0	0	ENST00000435221	1225	1039.97	0	0	ENST00000435221	1225	1067.45	0	0
ENST00000451778	827	628.447	0	0	ENST00000451778	827	650.024	0	0	ENST00000451778	827	642.246	0	0	ENST00000451778	827	669.832	0	0
ENST00000409119	896	696.92	0	0	ENST00000409119	896	718.749	0	0	ENST00000409119	896	710.97	0	0	ENST00000409119	896	738.692	0	0
ENST00000355716	1707	1507.39	0	0	ENST00000355716	1707	1529.53	0	0	ENST00000355716	1707	1521.97	0	0	ENST00000355716	1707	1549.45	0	0
ENST00000475523	1645	1445.39	0	0	ENST00000475523	1645	1467.53	0	0	ENST00000475523	1645	1459.97	0	0	ENST00000475523	1645	1487.45	0	0
ENST00000442392	840	641.384	0	0	ENST00000442392	840	663.024	0	0	ENST00000442392	840	655.246	0	0	ENST00000442392	840	682.832	0	0
ENST00000482074	957	757.775	0	0	ENST00000482074	957	779.527	0	0	ENST00000482074	957	771.97	0	0	ENST00000482074	957	799.616	0	0
ENST00000496064	1480	1280.39	0	0	ENST00000496064	1480	1302.53	0	0	ENST00000496064	1480	1294.97	0	0	ENST00000496064	1480	1322.45	0	0
ENST00000463471	4255	4055.39	0	0	ENST00000463471	4255	4077.53	0	0	ENST00000463471	4255	4069.97	0	0	ENST00000463471	4255	4097.45	0	0
ENST00000466750	2603	2403.39	0	0	ENST00000466750	2603	2425.53	0	0	ENST00000466750	2603	2417.97	0	0	ENST00000466750	2603	2445.45	0	0
ENST00000471768	539	348.382	0	0	ENST00000471768	539	367.297	0	0	ENST00000471768	539	360.919	0	0	ENST00000471768	539	384.605	0	0
ENST00000463835	872	673.056	0	0	ENST00000463835	872	694.888	0	0	ENST00000463835	872	687.11	0	0	ENST00000463835	872	714.692	0	0
ENST00000482602	434	255.938	0	0	ENST00000482602	434	271.545	0	0	ENST00000482602	434	269.856	0	0	ENST00000482602	434	285.542	0	0
ENST00000480305	494	307.551	0	0	ENST00000480305	494	325.168	0	0	ENST00000480305	494	320.523	0	0	ENST00000480305	494	341.503	0	0
ENST00000456687	1297	1097.39	0	0	ENST00000456687	1297	1119.53	0	0	ENST00000456687	1297	1111.97	0	0	ENST00000456687	1297	1139.45	0	0
ENST00000424215	626	430.647	0	0	ENST00000424215	626	451.373	0	0	ENST00000424215	626	444.169	0	0	ENST00000424215	626	469.911	0	0
ENST00000493183	840	641.384	0	0	ENST00000493183	840	663.024	0	0	ENST00000493183	840	655.246	0	0	ENST00000493183	840	682.832	0	0
ENST00000474659	785	586.634	0	0	ENST00000474659	785	608.15	0	0	ENST00000474659	785	600.432	0	0	ENST00000474659	785	628.03	0	0
ENST00000378425	2665	2465.39	0	0	ENST00000378425	2665	2487.53	0	0	ENST00000378425	2665	2479.97	0	0	ENST00000378425	2665	2507.45	0	0
ENST00000444521	2827	2627.39	0	0	ENST00000444521	2827	2649.53	0	0	ENST00000444521	2827	2641.97	0	0	ENST00000444521	2827	2669.45	0	0
ENST00000419916	2749	2549.39	0	0	ENST00000419916	2749	2571.53	0	0	ENST00000419916	2749	2563.97	0	0	ENST00000419916	2749	2591.45	0	0
ENST00000378424	2765	2565.39	0	0	ENST00000378424	2765	2587.53	0	0	ENST00000378424	2765	2579.97	0	0	ENST00000378424	2765	2607.45	0	0
ENST00000537325	1096	896.389	0	0	ENST00000537325	1096	918.527	0	0	ENST00000537325	1096	910.97	0	0	ENST00000537325	1096	938.452	0	0
ENST00000378427	2689	2489.39	0	0	ENST00000378427	2689	2511.53	0	0	ENST00000378427	2689	2503.97	0	0	ENST00000378427	2689	2531.45	0	0
ENST00000464043	946	746.85	0	0	ENST00000464043	946	768.527	0	0	ENST00000464043	946	760.97	0	0	ENST00000464043	946	788.616	0	0
ENST00000465233	589	394.769	0	0	ENST00000465233	589	415.49	0	0	ENST00000465233	589	408.064	0	0	ENST00000465233	589	433.271	0	0
ENST00000498083	464	281.126	0	0	ENST00000498083	464	298.178	0	0	ENST00000498083	464	294.513	0	0	ENST00000498083	464	313.087	0	0
ENST00000481683	689	491.855	0	0	ENST00000481683	689	513.146	0	0	ENST00000481683	689	505.747	0	0	ENST00000481683	689	532.319	0	0
ENST00000484099	2577	2377.39	0	0	ENST00000484099	2577	2399.53	0	0	ENST00000484099	2577	2391.97	0	0	ENST00000484099	2577	2419.45	0	0
ENST00000477045	619	423.862	0	0	ENST00000477045	619	444.553	0	0	ENST00000477045	619	437.301	0	0	ENST00000477045	619	462.911	0	0
ENST00000476686	2506	2306.39	0	0	ENST00000476686	2506	2328.53	0	0	ENST00000476686	2506	2320.97	0	0	ENST00000476686	2506	2348.45	0	0
ENST00000471840	552	360.443	0	0	ENST00000471840	552	379.883	0	0	ENST00000471840	552	372.953	0	0	ENST00000471840	552	396.976	0	0
ENST00000378412	2849	2649.39	0	0	ENST00000378412	2849	2671.53	0	0	ENST00000378412	2849	2663.97	0	0	ENST00000378412	2849	2691.45	0	0
ENST00000502556	1943	1743.39	0	0	ENST00000502556	1943	1765.53	0	0	ENST00000502556	1943	1757.97	0	0	ENST00000502556	1943	1785.45	0	0
ENST00000504800	2443	2243.39	0	0	ENST00000504800	2443	2265.53	0	0	ENST00000504800	2443	2257.97	0	0	ENST00000504800	2443	2285.45	0	0
ENST00000491941	482	297.053	0	0	ENST00000491941	482	313.856	0	0	ENST00000491941	482	310.375	0	0	ENST00000491941	482	330.045	0	0
ENST00000464195	559	366.888	0	0	ENST00000464195	559	386.497	0	0	ENST00000464195	559	379.686	0	0	ENST00000464195	559	403.815	0	0
ENST00000469962	460	277.681	0	0	ENST00000469962	460	294.696	0	0	ENST00000469962	460	291.155	0	0	ENST00000469962	460	309.371	0	0
ENST00000509374	546	354.915	0	0	ENST00000509374	546	373.997	0	0	ENST00000509374	546	367.327	0	0	ENST00000509374	546	391.253	0	0
ENST00000511099	554	362.332	0	0	ENST00000511099	554	381.691	0	0	ENST00000511099	554	374.953	0	0	ENST00000511099	554	398.936	0	0
ENST00000427302	373	207.769	0	0	ENST00000427302	373	220.258	0	0	ENST00000427302	373	222.107	0	0	ENST00000427302	373	230.891	0	0
ENST00000401095	7257	7057.39	0	0	ENST00000401095	7257	7079.53	0	0	ENST00000401095	7257	7071.97	0	0	ENST00000401095	7257	7099.45	0	0
ENST00000457440	607	412.241	0	0	ENST00000457440	607	432.685	0	0	ENST00000457440	607	425.518	0	0	ENST00000457440	607	451.14	0	0
ENST00000429389	429	251.667	0	0	ENST00000429389	429	267.192	0	0	ENST00000429389	429	265.882	0	0	ENST00000429389	429	280.889	0	0
ENST00000378404	1421	1221.39	0	0	ENST00000378404	1421	1243.53	0	0	ENST00000378404	1421	1235.97	0	0	ENST00000378404	1421	1263.45	0	0
ENST00000606861	2917	2717.39	0	0	ENST00000606861	2917	2739.53	0	0	ENST00000606861	2917	2731.97	0	0	ENST00000606861	2917	2759.45	0	0
ENST00000321399	2226	2026.39	0	0	ENST00000321399	2226	2048.53	0	0	ENST00000321399	2226	2040.97	0	0	ENST00000321399	2226	2068.45	0	0
ENST00000413472	561	368.777	0	0	ENST00000413472	561	388.458	0	0	ENST00000413472	561	381.648	0	0	ENST00000413472	561	405.774	0	0
ENST00000453118	1697	1497.39	0	0	ENST00000453118	1697	1519.53	0	0	ENST00000453118	1697	1511.97	0	0	ENST00000453118	1697	1539.45	0	0
ENST00000445317	4247	4047.39	0	0	ENST00000445317	4247	4069.53	0	0	ENST00000445317	4247	4061.97	0	0	ENST00000445317	4247	4089.45	0	0
ENST00000415573	280	142.653	0	0	ENST00000415573	280	152.7	0	0	ENST00000415573	280	152.081	0	0	ENST00000415573	280	153.08	0	0
ENST00000420957	435	256.747	0	0	ENST00000420957	435	272.489	0	0	ENST00000420957	435	270.712	0	0	ENST00000420957	435	286.249	0	0
ENST00000321336	664	467.53	0	0	ENST00000321336	664	488.345	0	0	ENST00000321336	664	481.144	0	0	ENST00000321336	664	507.473	0	0
ENST00000511072	4282	4082.39	0	0	ENST00000511072	4282	4104.53	0	0	ENST00000511072	4282	4096.97	0	0	ENST00000511072	4282	4124.45	0	0
ENST00000607632	581	387.324	0	0	ENST00000607632	581	407.779	0	0	ENST00000607632	581	400.349	0	0	ENST00000607632	581	425.357	0	0
ENST00000378391	5447	5247.39	0	0	ENST00000378391	5447	5269.53	0	0	ENST00000378391	5447	5261.97	0	0	ENST00000378391	5447	5289.45	0	0
ENST00000514189	4236	4036.39	0	0	ENST00000514189	4236	4058.53	0	0	ENST00000514189	4236	4050.97	0	0	ENST00000514189	4236	4078.45	0	0
ENST00000270722	8690	8490.39	0	0	ENST00000270722	8690	8512.53	0	0	ENST00000270722	8690	8504.97	0	0	ENST00000270722	8690	8532.45	0	0
ENST00000512462	3723	3523.39	0	0	ENST00000512462	3723	3545.53	0	0	ENST00000512462	3723	3537.97	0	0	ENST00000512462	3723	3565.45	0	0
ENST00000463591	384	216.305	0	0	ENST00000463591	384	229.197	0	0	ENST00000463591	384	230.884	0	0	ENST00000463591	384	240.315	0	0
ENST00000509860	3737	3537.39	0	0	ENST00000509860	3737	3559.53	0	0	ENST00000509860	3737	3551.97	0	0	ENST00000509860	3737	3579.45	0	0
ENST00000378389	1142	942.389	0	0	ENST00000378389	1142	964.527	0	0	ENST00000378389	1142	956.97	0	0	ENST00000378389	1142	984.452	0	0
ENST00000606170	557	365.037	0	0	ENST00000606170	557	384.575	0	0	ENST00000606170	557	377.725	0	0	ENST00000606170	557	401.896	0	0
ENST00000440516	469	285.445	0	0	ENST00000440516	469	302.621	0	0	ENST00000440516	469	298.895	0	0	ENST00000440516	469	317.799	0	0
ENST00000624175	2677	2477.39	0	0	ENST00000624175	2677	2499.53	0	0	ENST00000624175	2677	2491.97	0	0	ENST00000624175	2677	2519.45	0	0
ENST00000607061	3461	3261.39	0	0	ENST00000607061	3461	3283.53	0	0	ENST00000607061	3461	3275.97	0	0	ENST00000607061	3461	3303.45	0	0
ENST00000378378	3061	2861.39	0	0	ENST00000378378	3061	2883.53	0	0	ENST00000378378	3061	2875.97	0	0	ENST00000378378	3061	2903.45	0	0
ENST00000378373	2211	2011.39	0	0	ENST00000378373	2211	2033.53	0	0	ENST00000378373	2211	2025.97	0	0	ENST00000378373	2211	2053.45	0	0
ENST00000378371	2219	2019.39	0	0	ENST00000378371	2219	2041.53	0	0	ENST00000378371	2219	2033.97	0	0	ENST00000378371	2219	2061.45	0	0
ENST00000445297	836	637.384	0	0	ENST00000445297	836	659.024	0	0	ENST00000445297	836	651.246	0	0	ENST00000445297	836	678.832	0	0
ENST00000464620	1403	1203.39	0	0	ENST00000464620	1403	1225.53	0	0	ENST00000464620	1403	1217.97	0	0	ENST00000464620	1403	1245.45	0	0
ENST00000418137	576	382.635	0	0	ENST00000418137	576	402.861	0	0	ENST00000418137	576	395.59	0	0	ENST00000418137	576	420.484	0	0
ENST00000485984	2340	2140.39	0	0	ENST00000485984	2340	2162.53	0	0	ENST00000485984	2340	2154.97	0	0	ENST00000485984	2340	2182.45	0	0
ENST00000606489	382	214.905	0	0	ENST00000606489	382	227.541	0	0	ENST00000606489	382	229.344	0	0	ENST00000606489	382	238.564	0	0
ENST00000294599	4501	4301.39	0	0	ENST00000294599	4501	4323.53	0	0	ENST00000294599	4501	4315.97	0	0	ENST00000294599	4501	4343.45	0	0
ENST00000356575	5455	5255.39	0	0	ENST00000356575	5455	5277.53	0	0	ENST00000356575	5455	5269.97	0	0	ENST00000356575	5455	5297.45	0	0
ENST00000494257	1174	974.389	0	0	ENST00000494257	1174	996.527	0	0	ENST00000494257	1174	988.97	0	0	ENST00000494257	1174	1016.45	0	0
ENST00000485002	4705	4505.39	0	0	ENST00000485002	4705	4527.53	0	0	ENST00000485002	4705	4519.97	0	0	ENST00000485002	4705	4547.45	0	0
ENST00000491842	743	545.032	0	0	ENST00000491842	743	566.267	0	0	ENST00000491842	743	558.841	0	0	ENST00000491842	743	586.151	0	0
ENST00000475790	883	683.92	0	0	ENST00000475790	883	705.749	0	0	ENST00000475790	883	698.04	0	0	ENST00000475790	883	725.692	0	0
ENST00000461795	418	242.869	0	0	ENST00000461795	418	257.625	0	0	ENST00000461795	418	257.428	0	0	ENST00000461795	418	270.881	0	0
ENST00000385042	96	34.6747	0	0	ENST00000385042	96	35.3614	0	0	ENST00000385042	96	29.3548	0	0	ENST00000385042	96	28.5853	0	0
ENST00000435049	622	426.776	0	0	ENST00000435049	622	447.464	0	0	ENST00000435049	622	440.169	0	0	ENST00000435049	622	465.911	0	0
ENST00000378344	2414	2214.39	2	0.0120432	ENST00000378344	2414	2236.53	0	0	ENST00000378344	2414	2228.97	0	0	ENST00000378344	2414	2256.45	0	0
ENST00000344579	2189	1989.39	0	0	ENST00000344579	2189	2011.53	3	0.0155443	ENST00000344579	2189	2003.97	0	0	ENST00000344579	2189	2031.45	1	0.00508757
ENST00000378322	1998	1798.39	0	0	ENST00000378322	1998	1820.53	0	0	ENST00000378322	1998	1812.97	0	0	ENST00000378322	1998	1840.45	0	0
ENST00000270708	1665	1465.39	0	0	ENST00000270708	1665	1487.53	0	0	ENST00000270708	1665	1479.97	0	0	ENST00000270708	1665	1507.45	0	0
ENST00000471223	6089	5889.39	0	0	ENST00000471223	6089	5911.53	0	0	ENST00000471223	6089	5903.97	0	0	ENST00000471223	6089	5931.45	0	0
ENST00000424367	940	740.85	0	0	ENST00000424367	940	762.527	0	0	ENST00000424367	940	754.97	0	0	ENST00000424367	940	782.616	0	0
ENST00000497940	1101	901.389	0	0	ENST00000497940	1101	923.527	0	0	ENST00000497940	1101	915.97	0	0	ENST00000497940	1101	943.452	0	0
ENST00000469643	563	370.664	0	0	ENST00000469643	563	390.301	0	0	ENST00000469643	563	383.493	0	0	ENST00000469643	563	407.774	0	0
ENST00000494884	433	254.992	0	0	ENST00000494884	433	270.658	0	0	ENST00000494884	433	269.142	0	0	ENST00000494884	433	284.571	0	0
ENST00000465916	779	580.692	0	0	ENST00000465916	779	602.15	0	0	ENST00000465916	779	594.432	0	0	ENST00000465916	779	622.03	0	0
ENST00000419924	603	408.406	0	0	ENST00000419924	603	428.772	0	0	ENST00000419924	603	421.688	0	0	ENST00000419924	603	447.14	0	0
ENST00000479331	446	265.674	0	0	ENST00000479331	446	282.218	0	0	ENST00000479331	446	279.449	0	0	ENST00000479331	446	296.298	0	0
ENST00000378295	5188	4988.39	0	0	ENST00000378295	5188	5010.53	0	0	ENST00000378295	5188	5002.97	0	0	ENST00000378295	5188	5030.45	0	0
ENST00000604074	4806	4606.39	0	0	ENST00000604074	4806	4628.53	0	0	ENST00000604074	4806	4620.97	0	0	ENST00000604074	4806	4648.45	0	0
ENST00000354437	2140	1940.39	0	0	ENST00000354437	2140	1962.53	0	0	ENST00000354437	2140	1954.97	0	0	ENST00000354437	2140	1982.45	0	0
ENST00000357733	4899	4699.39	0	0	ENST00000357733	4899	4721.53	0	0	ENST00000357733	4899	4713.97	0	0	ENST00000357733	4899	4741.45	0	0
ENST00000346387	4854	4654.39	0	0	ENST00000346387	4854	4676.53	0	0	ENST00000346387	4854	4668.97	0	0	ENST00000346387	4854	4696.45	0	0
ENST00000603362	1668	1468.39	0	0	ENST00000603362	1668	1490.53	0	0	ENST00000603362	1668	1482.97	0	0	ENST00000603362	1668	1510.45	0	0
ENST00000604479	1623	1423.39	0	0	ENST00000604479	1623	1445.53	0	0	ENST00000604479	1623	1437.97	0	0	ENST00000604479	1623	1465.45	0	0
ENST00000378285	2117	1917.39	0	0	ENST00000378285	2117	1939.53	0	0	ENST00000378285	2117	1931.97	0	0	ENST00000378285	2117	1959.45	0	0
ENST00000378280	2062	1862.39	0	0	ENST00000378280	2062	1884.53	0	0	ENST00000378280	2062	1876.97	0	0	ENST00000378280	2062	1904.45	0	0
ENST00000378288	5120	4920.39	0	0	ENST00000378288	5120	4942.53	0	0	ENST00000378288	5120	4934.97	0	0	ENST00000378288	5120	4962.45	0	0
ENST00000603364	1551	1351.39	0	0	ENST00000603364	1551	1373.53	0	0	ENST00000603364	1551	1365.97	0	0	ENST00000603364	1551	1393.45	0	0
ENST00000604194	1092	892.389	0	0	ENST00000604194	1092	914.527	0	0	ENST00000604194	1092	906.97	0	0	ENST00000604194	1092	934.452	0	0
ENST00000378290	1831	1631.39	0	0	ENST00000378290	1831	1653.53	0	0	ENST00000378290	1831	1645.97	0	0	ENST00000378290	1831	1673.45	0	0
ENST00000604566	1358	1158.39	0	0	ENST00000604566	1358	1180.53	0	0	ENST00000604566	1358	1172.97	0	0	ENST00000604566	1358	1200.45	0	0
ENST00000443034	754	555.921	0	0	ENST00000443034	754	577.21	0	0	ENST00000443034	754	569.784	0	0	ENST00000443034	754	597.151	0	0
ENST00000416554	351	191.095	0	0	ENST00000416554	351	202.831	0	0	ENST00000416554	351	204.533	0	0	ENST00000416554	351	211.411	0	0
ENST00000624167	988	788.389	0	0	ENST00000624167	988	810.527	0	0	ENST00000624167	988	802.97	0	0	ENST00000624167	988	830.452	0	0
ENST00000418088	3329	3129.39	0	0	ENST00000418088	3329	3151.53	0	0	ENST00000418088	3329	3143.97	0	0	ENST00000418088	3329	3171.45	0	0
ENST00000452079	6358	6158.39	0	0	ENST00000452079	6358	6180.53	0	0	ENST00000452079	6358	6172.97	0	0	ENST00000452079	6358	6200.45	0	0
ENST00000419973	657	460.577	0	0	ENST00000419973	657	481.394	0	0	ENST00000419973	657	474.336	0	0	ENST00000419973	657	500.574	0	0
ENST00000423764	2875	2675.39	0	0	ENST00000423764	2875	2697.53	0	0	ENST00000423764	2875	2689.97	0	0	ENST00000423764	2875	2717.45	0	0
ENST00000587071	737	539.032	0	0	ENST00000587071	737	560.549	0	0	ENST00000587071	737	552.841	0	0	ENST00000587071	737	580.21	0	0
ENST00000608600	597	402.488	0	0	ENST00000608600	597	422.9	0	0	ENST00000608600	597	415.899	0	0	ENST00000608600	597	441.14	0	0
ENST00000624948	714	516.297	0	0	ENST00000624948	714	537.987	0	0	ENST00000624948	714	530.328	0	0	ENST00000624948	714	557.21	0	0
ENST00000611447	161	75.9873	0	0	ENST00000611447	161	81.7756	0	0	ENST00000611447	161	75.0546	0	0	ENST00000611447	161	70.3442	0	0
ENST00000294600	2176	1976.39	1	0.00674671	ENST00000294600	2176	1998.53	0	0	ENST00000294600	2176	1990.97	0	0	ENST00000294600	2176	2018.45	0	0
ENST00000462521	2252	2052.39	0	0	ENST00000462521	2252	2074.53	0	0	ENST00000462521	2252	2066.97	0	0	ENST00000462521	2252	2094.45	0	0
ENST00000444870	546	354.915	6	0.225419	ENST00000444870	546	373.997	2	0.055736	ENST00000444870	546	367.327	45	1.26435	ENST00000444870	546	391.253	5	0.132077
ENST00000452264	447	266.562	0	0	ENST00000452264	447	283.072	0	0	ENST00000452264	447	280.184	0	0	ENST00000452264	447	297.268	0	0
ENST00000561886	491	305.025	0	0	ENST00000561886	491	322.432	0	0	ENST00000561886	491	317.983	0	0	ENST00000561886	491	338.572	0	0
ENST00000378251	4310	4110.39	0	0	ENST00000378251	4310	4132.53	0	0	ENST00000378251	4310	4124.97	1.30384	0.00326221	ENST00000378251	4310	4152.45	0	0
ENST00000462356	575	381.635	0	0	ENST00000462356	575	401.942	0	0	ENST00000462356	575	394.709	0.875238	0.0228852	ENST00000462356	575	419.484	0	0
ENST00000479239	434	255.938	0	0	ENST00000479239	434	271.545	0	0	ENST00000479239	434	269.856	0	0	ENST00000479239	434	285.542	0	0
ENST00000581512	297	153.523	0	0	ENST00000581512	297	164.557	0	0	ENST00000581512	297	164.206	0	0	ENST00000581512	297	166.818	0	0
ENST00000607459	531	340.943	0	0	ENST00000607459	531	359.738	0	0	ENST00000607459	531	353.607	0	0	ENST00000607459	531	377.064	0	0
ENST00000378230	6424	6224.39	0	0	ENST00000378230	6424	6246.53	2.98339	0.0049779	ENST00000378230	6424	6238.97	0	0	ENST00000378230	6424	6266.45	0	0
ENST00000484420	458	275.884	0	0	ENST00000484420	458	292.908	0	0	ENST00000484420	458	289.337	1	0.03567	ENST00000484420	458	307.403	0	0
ENST00000438539	683	486.051	0	0	ENST00000438539	683	507.197	0	0	ENST00000438539	683	499.747	0	0	ENST00000438539	683	526.319	0	0
ENST00000461667	926	726.85	0	0	ENST00000461667	926	748.602	0	0	ENST00000461667	926	740.97	0	0	ENST00000461667	926	768.616	0	0
ENST00000495701	485	299.558	0	0	ENST00000495701	485	316.727	0	0	ENST00000495701	485	312.699	0	0	ENST00000495701	485	332.844	0	0
ENST00000460038	696	498.756	0	0	ENST00000460038	696	520.094	8.07804	0.161882	ENST00000460038	696	512.696	0	0	ENST00000460038	696	539.319	0	0
ENST00000494653	2174	1974.39	0	0	ENST00000494653	2174	1996.53	2.93857	0.0153404	ENST00000494653	2174	1988.97	0	0	ENST00000494653	2174	2016.45	0	0
ENST00000443466	430	252.506	0	0	ENST00000443466	430	268.08	0	0	ENST00000443466	430	266.655	0	0	ENST00000443466	430	281.774	0	0
ENST00000428079	918	718.85	0	0	ENST00000428079	918	740.602	0	0	ENST00000428079	918	732.97	0	0	ENST00000428079	918	760.616	0	0
ENST00000494951	390	220.974	0	0	ENST00000494951	390	234.057	0	0	ENST00000494951	390	235.568	0	0	ENST00000494951	390	245.557	0	0
ENST00000378223	1121	921.389	0	0	ENST00000378223	1121	943.527	0	0	ENST00000378223	1121	935.97	0	0	ENST00000378223	1121	963.452	0	0
ENST00000625756	649	452.852	0	0	ENST00000625756	649	473.682	0	0	ENST00000625756	649	466.666	0	0	ENST00000625756	649	492.623	0	0
ENST00000338895	3105	2905.39	0	0	ENST00000338895	3105	2927.53	0	0	ENST00000338895	3105	2919.97	0	0	ENST00000338895	3105	2947.45	0	0
ENST00000378209	3028	2828.39	0	0	ENST00000378209	3028	2850.53	0	0	ENST00000378209	3028	2842.97	0	0	ENST00000378209	3028	2870.45	0	0
ENST00000491998	3152	2952.39	0	0	ENST00000491998	3152	2974.53	0	0	ENST00000491998	3152	2966.97	0	0	ENST00000491998	3152	2994.45	0	0
ENST00000468793	2986	2786.39	0	0	ENST00000468793	2986	2808.53	0	0	ENST00000468793	2986	2800.97	0	0	ENST00000468793	2986	2828.45	0	0
ENST00000477548	2923	2723.39	0	0	ENST00000477548	2923	2745.53	0	0	ENST00000477548	2923	2737.97	0	0	ENST00000477548	2923	2765.45	0	0
ENST00000339350	3005	2805.39	0	0	ENST00000339350	3005	2827.53	0	0	ENST00000339350	3005	2819.97	0	0	ENST00000339350	3005	2847.45	0	0
ENST00000378206	2842	2642.39	0	0	ENST00000378206	2842	2664.53	0	0	ENST00000378206	2842	2656.97	0	0	ENST00000378206	2842	2684.45	0	0
ENST00000475969	2731	2531.39	0	0	ENST00000475969	2731	2553.53	0	0	ENST00000475969	2731	2545.97	0	0	ENST00000475969	2731	2573.45	0	0
ENST00000341385	572	378.828	0	0	ENST00000341385	572	399.022	0	0	ENST00000341385	572	391.828	0	0	ENST00000341385	572	416.567	0	0
ENST00000481945	636	440.208	0	0	ENST00000481945	636	460.963	0	0	ENST00000481945	636	453.988	0	0	ENST00000481945	636	479.721	0	0
ENST00000461150	686	488.904	0	0	ENST00000461150	686	510.146	0	0	ENST00000461150	686	502.747	0	0	ENST00000461150	686	529.319	0	0
ENST00000486765	2517	2317.39	0	0	ENST00000486765	2517	2339.53	0	0	ENST00000486765	2517	2331.97	0	0	ENST00000486765	2517	2359.45	0	0
ENST00000361605	1666	1466.39	0	0	ENST00000361605	1666	1488.53	0	0	ENST00000361605	1666	1480.97	0	0	ENST00000361605	1666	1508.45	0	0
ENST00000474140	3499	3299.39	0	0	ENST00000474140	3499	3321.53	0	0	ENST00000474140	3499	3313.97	0	0	ENST00000474140	3499	3341.45	0	0
ENST00000413332	634	438.341	0	0	ENST00000413332	634	459.009	0	0	ENST00000413332	634	452.033	0	0	ENST00000413332	634	477.721	0	0
ENST00000442673	3059	2859.39	0	0	ENST00000442673	3059	2881.53	0	0	ENST00000442673	3059	2873.97	0	0	ENST00000442673	3059	2901.45	0	0
ENST00000439488	1940	1740.39	0	0	ENST00000439488	1940	1762.53	0	0	ENST00000439488	1940	1754.97	0	0	ENST00000439488	1940	1782.45	0	0
ENST00000635619	559	366.888	0	0	ENST00000635619	559	386.497	0	0	ENST00000635619	559	379.686	0	0	ENST00000635619	559	403.815	0	0
ENST00000456897	561	368.777	0	0	ENST00000456897	561	388.458	0	0	ENST00000456897	561	381.648	0	0	ENST00000456897	561	405.774	0	0
ENST00000412674	3242	3042.39	0	0	ENST00000412674	3242	3064.53	0	0	ENST00000412674	3242	3056.97	0	0	ENST00000412674	3242	3084.45	0	0
ENST00000635247	1646	1446.39	0	0	ENST00000635247	1646	1468.53	0	0	ENST00000635247	1646	1460.97	0	0	ENST00000635247	1646	1488.45	0	0
ENST00000635127	1402	1202.39	0	0	ENST00000635127	1402	1224.53	0	0	ENST00000635127	1402	1216.97	0	0	ENST00000635127	1402	1244.45	0	0
ENST00000425194	937	737.85	0	0	ENST00000425194	937	759.527	0	0	ENST00000425194	937	751.97	0	0	ENST00000425194	937	779.616	0	0
ENST00000449232	372	207.026	0	0	ENST00000449232	372	219.401	0	0	ENST00000449232	372	221.231	0	0	ENST00000449232	372	230.085	0	0
ENST00000635002	1392	1192.39	0	0	ENST00000635002	1392	1214.53	0	0	ENST00000635002	1392	1206.97	0	0	ENST00000635002	1392	1234.45	0	0
ENST00000423197	2077	1877.39	0	0	ENST00000423197	2077	1899.53	0	0	ENST00000423197	2077	1891.97	0	0	ENST00000423197	2077	1919.45	0	0
ENST00000635312	1427	1227.39	0	0	ENST00000635312	1427	1249.53	0	0	ENST00000635312	1427	1241.97	0	0	ENST00000635312	1427	1269.45	0	0
ENST00000633821	579	385.441	0	0	ENST00000633821	579	405.82	0	0	ENST00000633821	579	398.47	0	0	ENST00000633821	579	423.357	0	0
ENST00000635642	1347	1147.39	0	0	ENST00000635642	1347	1169.53	0	0	ENST00000635642	1347	1161.97	0	0	ENST00000635642	1347	1189.45	0	0
ENST00000438791	356	194.654	0	0	ENST00000438791	356	206.498	0	0	ENST00000438791	356	208.473	0	0	ENST00000438791	356	215.868	0	0
ENST00000634256	1107	907.389	0	0	ENST00000634256	1107	929.527	0	0	ENST00000634256	1107	921.97	0	0	ENST00000634256	1107	949.452	0	0
ENST00000635556	914	714.85	0	0	ENST00000635556	914	736.676	0	0	ENST00000635556	914	728.97	0	0	ENST00000635556	914	756.616	0	0
ENST00000420522	682	485.051	0	0	ENST00000420522	682	506.197	0	0	ENST00000420522	682	498.747	0	0	ENST00000420522	682	525.319	0	0
ENST00000378190	2383	2183.39	0	0	ENST00000378190	2383	2205.53	0	0	ENST00000378190	2383	2197.97	0	0	ENST00000378190	2383	2225.45	0	0
ENST00000378191	11666	11466.4	0	0	ENST00000378191	11666	11488.5	0	0	ENST00000378191	11666	11481	0	0	ENST00000378191	11666	11508.5	0	0
ENST00000466761	298	154.249	0	0	ENST00000466761	298	165.12	0	0	ENST00000466761	298	164.922	0	0	ENST00000466761	298	167.706	0	0
ENST00000618671	95	33.9491	0	0	ENST00000618671	95	34.5433	0	0	ENST00000618671	95	28.4717	0	0	ENST00000618671	95	27.8104	0	0
ENST00000443270	449	268.028	0	0	ENST00000443270	449	284.836	0	0	ENST00000443270	449	281.801	0	0	ENST00000443270	449	299.237	0	0
ENST00000564261	1697	1497.39	0	0	ENST00000564261	1697	1519.53	0	0	ENST00000564261	1697	1511.97	0	0	ENST00000564261	1697	1539.45	0	0
ENST00000579887	73	27.2298	0	0	ENST00000579887	73	28.8922	0	0	ENST00000579887	73	24.9098	0	0	ENST00000579887	73	22.8062	0	0
ENST00000413887	363	200.01	0	0	ENST00000413887	363	212.373	0	0	ENST00000413887	363	213.965	0	0	ENST00000413887	363	221.917	0	0
ENST00000401226	89	31.1958	0	0	ENST00000401226	89	32.9915	0	0	ENST00000401226	89	27.5193	0	0	ENST00000401226	89	26.1291	0	0
ENST00000582517	70	25.9848	0	0	ENST00000582517	70	27.4131	0	0	ENST00000582517	70	23.0443	0	0	ENST00000582517	70	21.2706	0	0
ENST00000460696	3967	3767.39	0	0	ENST00000460696	3967	3789.53	0	0	ENST00000460696	3967	3781.97	0	0	ENST00000460696	3967	3809.45	0	0
ENST00000378161	4370	4170.39	0	0	ENST00000378161	4370	4192.53	0	0	ENST00000378161	4370	4184.97	0	0	ENST00000378161	4370	4212.45	0	0
ENST00000478423	4467	4267.39	0	0	ENST00000478423	4467	4289.53	0	0	ENST00000478423	4467	4281.97	0	0	ENST00000478423	4467	4309.45	0	0
ENST00000489180	5548	5348.39	0	0	ENST00000489180	5548	5370.53	0	0	ENST00000489180	5548	5362.97	0	0	ENST00000489180	5548	5390.45	0	0
ENST00000378156	4994	4794.39	0	0	ENST00000378156	4994	4816.53	0	0	ENST00000378156	4994	4808.97	0	0	ENST00000378156	4994	4836.45	0	0
ENST00000378169	4213	4013.39	0	0	ENST00000378169	4213	4035.53	0	0	ENST00000378169	4213	4027.97	0	0	ENST00000378169	4213	4055.45	0	0
ENST00000468253	781	582.692	0	0	ENST00000468253	781	604.15	0	0	ENST00000468253	781	596.432	0	0	ENST00000468253	781	624.03	0	0
ENST00000506941	570	377.134	0	0	ENST00000506941	570	397.063	0	0	ENST00000506941	570	390.065	0	0	ENST00000506941	570	414.609	0	0
ENST00000470763	3156	2956.39	0	0	ENST00000470763	3156	2978.53	0	0	ENST00000470763	3156	2970.97	0	0	ENST00000470763	3156	2998.45	0	0
ENST00000622020	3004	2804.39	0	0	ENST00000622020	3004	2826.53	0	0	ENST00000622020	3004	2818.97	0	0	ENST00000622020	3004	2846.45	0	0
ENST00000466897	1192	992.389	0	0	ENST00000466897	1192	1014.53	0	0	ENST00000466897	1192	1006.97	0	0	ENST00000466897	1192	1034.45	0	0
ENST00000585151	86	30	0	0	ENST00000585151	86	32.3942	0	0	ENST00000585151	86	26.8672	0	0	ENST00000585151	86	25.5503	0	0
ENST00000378111	822	623.573	0	0	ENST00000378111	822	645.024	0	0	ENST00000378111	822	637.309	0	0	ENST00000378111	822	664.899	0	0
ENST00000378097	4201	4001.39	0	0	ENST00000378097	4201	4023.53	0	0	ENST00000378097	4201	4015.97	0	0	ENST00000378097	4201	4043.45	0	0
ENST00000493807	560	367.777	0	0	ENST00000493807	560	387.497	0	0	ENST00000493807	560	380.686	0	0	ENST00000493807	560	404.815	0	0
ENST00000378092	1202	1002.39	0	0	ENST00000378092	1202	1024.53	0	0	ENST00000378092	1202	1016.97	0	0	ENST00000378092	1202	1044.45	0	0
ENST00000478098	413	239.143	0	0	ENST00000478098	413	253.35	0	0	ENST00000478098	413	253.53	0	0	ENST00000478098	413	266.24	0	0
ENST00000445501	486	300.496	0	0	ENST00000445501	486	317.727	0	0	ENST00000445501	486	313.634	0	0	ENST00000445501	486	333.844	0	0
ENST00000352527	4165	3965.39	0	0	ENST00000352527	4165	3987.53	0	0	ENST00000352527	4165	3979.97	0	0	ENST00000352527	4165	4007.45	0	0
ENST00000341524	4207	4007.39	0	0	ENST00000341524	4207	4029.53	0	0	ENST00000341524	4207	4021.97	0	0	ENST00000341524	4207	4049.45	0	0
ENST00000389632	959	759.775	0	0	ENST00000389632	959	781.527	0	0	ENST00000389632	959	773.97	0	0	ENST00000389632	959	801.616	0	0
ENST00000428161	961	761.699	0	0	ENST00000428161	961	783.527	0	0	ENST00000428161	961	775.97	0	0	ENST00000428161	961	803.616	0	0
ENST00000602612	2396	2196.39	0	0	ENST00000602612	2396	2218.53	0	0	ENST00000602612	2396	2210.97	0	0	ENST00000602612	2396	2238.45	0	0
ENST00000435937	500	312.719	0	0	ENST00000435937	500	330.8	0	0	ENST00000435937	500	325.827	0	0	ENST00000435937	500	347.294	0	0
ENST00000164247	4273	4073.39	0	0	ENST00000164247	4273	4095.53	0	0	ENST00000164247	4273	4087.97	0	0	ENST00000164247	4273	4115.45	0	0
ENST00000459822	856	657.189	0	0	ENST00000459822	856	678.957	0	0	ENST00000459822	856	671.246	0	0	ENST00000459822	856	698.763	0	0
ENST00000472700	536	345.558	0	0	ENST00000472700	536	364.445	0	0	ENST00000472700	536	358.064	0	0	ENST00000472700	536	381.759	0	0
ENST00000378083	4142	3942.39	0	0	ENST00000378083	4142	3964.53	0	0	ENST00000378083	4142	3956.97	0	0	ENST00000378083	4142	3984.45	0	0
ENST00000458166	1336	1136.39	0	0	ENST00000458166	1336	1158.53	0	0	ENST00000458166	1336	1150.97	0	0	ENST00000458166	1336	1178.45	0	0
ENST00000462676	683	486.051	0	0	ENST00000462676	683	507.197	0	0	ENST00000462676	683	499.747	0	0	ENST00000462676	683	526.319	0	0
ENST00000481789	916	716.85	0	0	ENST00000481789	916	738.602	0	0	ENST00000481789	916	730.97	0	0	ENST00000481789	916	758.616	0	0
ENST00000262450	9646	9446.39	0	0	ENST00000262450	9646	9468.53	0	0	ENST00000262450	9646	9460.97	0	0	ENST00000262450	9646	9488.45	0	0
ENST00000475121	558	365.926	0	0	ENST00000475121	558	385.497	0	0	ENST00000475121	558	378.725	0	0	ENST00000475121	558	402.856	0	0
ENST00000462991	4396	4196.39	0	0	ENST00000462991	4396	4218.53	0	0	ENST00000462991	4396	4210.97	0	0	ENST00000462991	4396	4238.45	0	0
ENST00000377999	3044	2844.39	0	0	ENST00000377999	3044	2866.53	0	0	ENST00000377999	3044	2858.97	0	0	ENST00000377999	3044	2886.45	0	0
ENST00000496404	4966	4766.39	0	0	ENST00000496404	4966	4788.53	0	0	ENST00000496404	4966	4780.97	0	0	ENST00000496404	4966	4808.45	0	0
ENST00000491020	646	449.897	0	0	ENST00000491020	646	470.682	0	0	ENST00000491020	646	463.713	0	0	ENST00000491020	646	489.672	0	0
ENST00000484532	449	268.028	0	0	ENST00000484532	449	284.836	0	0	ENST00000484532	449	281.801	0	0	ENST00000484532	449	299.237	0	0
ENST00000234875	2078	1878.39	8.73158	0.0619829	ENST00000234875	2078	1900.53	26.4907	0.145276	ENST00000234875	2078	1892.97	38.1074	0.207765	ENST00000234875	2078	1920.45	19.3321	0.104038
ENST00000480661	2279	2079.39	0	0	ENST00000480661	2279	2101.53	0	0	ENST00000480661	2279	2093.97	0	0	ENST00000480661	2279	2121.45	0	0
ENST00000497965	786	587.634	19.2684	0.437224	ENST00000497965	786	609.15	3.40934	0.0583339	ENST00000497965	786	601.432	2.59378	0.0445096	ENST00000497965	786	629.03	27.7086	0.455261
ENST00000471204	524	334.495	0	0	ENST00000471204	524	353.064	0	0	ENST00000471204	524	347.43	10.1014	0.30007	ENST00000471204	524	370.327	6.95933	0.194222
ENST00000465387	508	320.035	0	0	ENST00000465387	508	338.222	0	0	ENST00000465387	508	332.714	0	0	ENST00000465387	508	354.726	0	0
ENST00000462296	600	405.447	0	0	ENST00000462296	600	425.815	0	0	ENST00000462296	600	418.772	0	0	ENST00000462296	600	444.14	0	0
ENST00000465335	806	607.573	0	0	ENST00000465335	806	629.024	0	0	ENST00000465335	806	621.372	0	0	ENST00000465335	806	649.03	0	0
ENST00000455744	378	211.596	0	0	ENST00000455744	378	224.296	0	0	ENST00000455744	378	226.18	0	0	ENST00000455744	378	235.256	0	0
ENST00000466994	1854	1654.39	0	0	ENST00000466994	1854	1676.53	0	0	ENST00000466994	1854	1668.97	0	0	ENST00000466994	1854	1696.45	0	0
ENST00000484435	551	359.626	0	0	ENST00000484435	551	378.921	0	0	ENST00000484435	551	371.953	0	0	ENST00000484435	551	396.016	0	0
ENST00000377939	3924	3724.39	0	0	ENST00000377939	3924	3746.53	0	0	ENST00000377939	3924	3738.97	0	0	ENST00000377939	3924	3766.45	0	0
ENST00000485539	1413	1213.39	0	0	ENST00000485539	1413	1235.53	0	0	ENST00000485539	1413	1227.97	0	0	ENST00000485539	1413	1255.45	0	0
ENST00000496676	3020	2820.39	0	0	ENST00000496676	3020	2842.53	0	0	ENST00000496676	3020	2834.97	0	0	ENST00000496676	3020	2862.45	0	0
ENST00000463453	266	134.112	0	0	ENST00000463453	266	144.254	0	0	ENST00000463453	266	142.196	0	0	ENST00000463453	266	141.795	0	0
ENST00000496329	231	114.944	0	0	ENST00000496329	231	124.25	0	0	ENST00000496329	231	119.559	0	0	ENST00000496329	231	115.631	0	0
ENST00000492476	612	416.99	0	0	ENST00000492476	612	437.642	0	0	ENST00000492476	612	430.431	0	0	ENST00000492476	612	456.004	0	0
ENST00000483336	473	288.907	0	0	ENST00000483336	473	306.029	0	0	ENST00000483336	473	302.552	0	0	ENST00000483336	473	321.539	0	0
ENST00000343813	4771	4571.39	0	0	ENST00000343813	4771	4593.53	0	0	ENST00000343813	4771	4585.97	0	0	ENST00000343813	4771	4613.45	0	0
ENST00000495791	328	174.074	0	0	ENST00000495791	328	185.885	0	0	ENST00000495791	328	186.59	0	0	ENST00000495791	328	191.914	0	0
ENST00000489498	2612	2412.39	0	0	ENST00000489498	2612	2434.53	0	0	ENST00000489498	2612	2426.97	0	0	ENST00000489498	2612	2454.45	0	0
ENST00000474756	1227	1027.39	0	0	ENST00000474756	1227	1049.53	0	0	ENST00000474756	1227	1041.97	0	0	ENST00000474756	1227	1069.45	0	0
ENST00000441724	1138	938.389	0	0	ENST00000441724	1138	960.527	0	0	ENST00000441724	1138	952.97	0	0	ENST00000441724	1138	980.452	0	0
ENST00000429480	1302	1102.39	0	0	ENST00000429480	1302	1124.53	0	0	ENST00000429480	1302	1116.97	0	0	ENST00000429480	1302	1144.45	0	0
ENST00000377898	697	499.756	0	0	ENST00000377898	697	521.094	0	0	ENST00000377898	697	513.696	0	0	ENST00000377898	697	540.265	0	0
ENST00000377893	4082	3882.39	0	0	ENST00000377893	4082	3904.53	0	0	ENST00000377893	4082	3896.97	0	0	ENST00000377893	4082	3924.45	0	0
ENST00000608083	1403	1203.39	0	0	ENST00000608083	1403	1225.53	0	0	ENST00000608083	1403	1217.97	0	0	ENST00000608083	1403	1245.45	0	0
ENST00000377842	1813	1613.39	0	0	ENST00000377842	1813	1635.53	0	0	ENST00000377842	1813	1627.97	0	0	ENST00000377842	1813	1655.45	0	0
ENST00000377845	1432	1232.39	0	0	ENST00000377845	1432	1254.53	0	0	ENST00000377845	1432	1246.97	0	0	ENST00000377845	1432	1274.45	0	0
ENST00000377855	1614	1414.39	0	0	ENST00000377855	1614	1436.53	0	0	ENST00000377855	1614	1428.97	0	0	ENST00000377855	1614	1456.45	0	0
ENST00000377860	1472	1272.39	0	0	ENST00000377860	1472	1294.53	0	0	ENST00000377860	1472	1286.97	0	0	ENST00000377860	1472	1314.45	0	0
ENST00000418124	1564	1364.39	0	0	ENST00000418124	1564	1386.53	0	0	ENST00000418124	1564	1378.97	0	0	ENST00000418124	1564	1406.45	0	0
ENST00000545482	1804	1604.39	0	0	ENST00000545482	1804	1626.53	0	0	ENST00000545482	1804	1618.97	0	0	ENST00000545482	1804	1646.45	0	0
ENST00000361521	2429	2229.39	0	0	ENST00000361521	2429	2251.53	0	0	ENST00000361521	2429	2243.97	0	0	ENST00000361521	2429	2271.45	0	0
ENST00000473466	868	669.056	0	0	ENST00000473466	868	690.888	0	0	ENST00000473466	868	683.178	0	0	ENST00000473466	868	710.763	0	0
ENST00000481175	748	550.032	0	0	ENST00000481175	748	571.21	0	0	ENST00000481175	748	563.841	0	0	ENST00000481175	748	591.151	0	0
ENST00000607670	837	638.384	0	0	ENST00000607670	837	660.024	0	0	ENST00000607670	837	652.246	0	0	ENST00000607670	837	679.832	0	0
ENST00000377837	1222	1022.39	0	0	ENST00000377837	1222	1044.53	0	0	ENST00000377837	1222	1036.97	0	0	ENST00000377837	1222	1064.45	0	0
ENST00000377836	507	319.101	0	0	ENST00000377836	507	337.257	0	0	ENST00000377836	507	331.918	0	0	ENST00000377836	507	353.833	0	0
ENST00000471190	349	189.512	0	0	ENST00000471190	349	201.481	1	0.0517297	ENST00000471190	349	203.046	1	0.0508291	ENST00000471190	349	209.814	0	0
ENST00000377834	4262	4062.39	0	0	ENST00000377834	4262	4084.53	0	0	ENST00000377834	4262	4076.97	0	0	ENST00000377834	4262	4104.45	0	0
ENST00000487437	968	768.622	0	0	ENST00000487437	968	790.527	0	0	ENST00000487437	968	782.97	0	0	ENST00000487437	968	810.616	0	0
ENST00000489730	730	532.138	0	0	ENST00000489730	730	553.605	0	0	ENST00000489730	730	546.006	0	0	ENST00000489730	730	573.21	0	0
ENST00000377828	3531	3331.39	1	0.00400257	ENST00000377828	3531	3353.53	0	0	ENST00000377828	3531	3345.97	0	0	ENST00000377828	3531	3373.45	0	0
ENST00000633651	566	373.4	0	0	ENST00000633651	566	393.222	0	0	ENST00000633651	566	386.143	0	0	ENST00000633651	566	410.733	0	0
ENST00000632142	564	371.589	0	0	ENST00000632142	564	391.222	0	0	ENST00000632142	564	384.377	0	0	ENST00000632142	564	408.774	0	0
ENST00000418286	641	444.987	0	0	ENST00000418286	641	465.823	0	0	ENST00000418286	641	458.759	0	0	ENST00000418286	641	484.672	0	0
ENST00000632803	455	273.23	0	0	ENST00000632803	455	290.33	0	0	ENST00000632803	455	286.758	0	0	ENST00000632803	455	304.714	0	0
ENST00000632593	506	318.232	0	0	ENST00000632593	506	336.257	0	0	ENST00000632593	506	331.02	0	0	ENST00000632593	506	352.869	0	0
ENST00000416731	1338	1138.39	0	0	ENST00000416731	1338	1160.53	0	0	ENST00000416731	1338	1152.97	0	0	ENST00000416731	1338	1180.45	0	0
ENST00000461727	1869	1669.39	0	0	ENST00000461727	1869	1691.53	0	0	ENST00000461727	1869	1683.97	0	0	ENST00000461727	1869	1711.45	0	0
ENST00000475228	813	614.573	0	0	ENST00000475228	813	636.024	0	0	ENST00000475228	813	628.309	0	0	ENST00000475228	813	655.965	0	0
ENST00000478323	270	136.479	0	0	ENST00000478323	270	146.716	0	0	ENST00000478323	270	145.037	0	0	ENST00000478323	270	144.836	0	0
ENST00000633239	1494	1294.39	0	0	ENST00000633239	1494	1316.53	0	0	ENST00000633239	1494	1308.97	7.90607	0.0623358	ENST00000633239	1494	1336.45	0	0
ENST00000475479	360	197.757	0	0	ENST00000475479	360	209.858	0	0	ENST00000475479	360	211.639	0	0	ENST00000475479	360	219.499	0	0
ENST00000434576	750	551.921	0	0	ENST00000434576	750	573.21	0	0	ENST00000434576	750	565.841	0	0	ENST00000434576	750	593.151	0	0
ENST00000477679	885	685.92	0	0	ENST00000477679	885	707.749	0	0	ENST00000477679	885	700.04	0	0	ENST00000477679	885	727.692	0	0
ENST00000468561	664	467.53	0	0	ENST00000468561	664	488.345	0	0	ENST00000468561	664	481.144	1.09393	0.0234651	ENST00000468561	664	507.473	0	0
ENST00000585139	63	23.8282	0	0	ENST00000585139	63	24.6406	0	0	ENST00000585139	63	20.7526	0	0	ENST00000585139	63	19.0757	0	0
ENST00000419034	351	191.095	0	0	ENST00000419034	351	202.831	0	0	ENST00000419034	351	204.533	0	0	ENST00000419034	351	211.411	0	0
ENST00000473343	1591	1391.39	0	0	ENST00000473343	1591	1413.53	0	0	ENST00000473343	1591	1405.97	0	0	ENST00000473343	1591	1433.45	0	0
[truncated: 198,146 more rows]

## Sheet: Supplementary Table 5
Supplementary Table S5. Estimates for transcript abundances in EVs (n = 4), reported as transcripts per million (TPM), were produced by Kallisto algorithm.
[truncated: 199,171 more rows]

[truncated: 6 more sheets: Supplementary Table 6, Supplementary Table 7, Supplementary Table 8, Supplementary Table 9, Supplementary Table 10, Supplementary Table 11]
